# Supplementary material
Source: Research Square preprint supplement (doi:10.21203/rs.3.rs-8865396/v1)
Supplement: Supplementary file 1 [file 487826487ab252be3f709bf1.xlsx]

## Sheet: Table_S1_isolates
Supplementary table S1: Isolate genomes used in this study
pubMLST	id	isolate	country	region	town_or_city	year	source	epidemiology	ST (MLST)	clonal_complex (MLST)	MAL-ED severity score
24254	24254_F79015	F79015	UK			2003	human	REFERENCE	867	ST-828 complex	0
24266	24266_8808	8808	UK			2007	Duck	REFERENCE	Cc2	C. coli clade 2	0
24269	24269_dfvf1656	dfvf1656	Denmark	Scotland		2006	Duck	REFERENCE	1572	C. coli clade 2	0
24270	24270_FSA05_280042	FSA05.280042	UK			2005	Environmental waters	REFERENCE	1992	C. coli clade 3	0
24272	24272_dfvf1912	dfvf1912	Denmark			2002	chicken	REFERENCE	1576	C. coli clade 3	0
57756	57756_CAMP1090	CAMP1090	UK	England	Oxford	2003	chicken	REFERENCE	828	ST-828 complex	0
57757	57757_CAMP2588	CAMP2588	UK			2007	Duck	REFERENCE	867	ST-828 complex	0
57758	57758_CAMP2681	CAMP2681	UK	Scotland		2006	chicken	REFERENCE	7243	C. coli clade 3	0
57760	57760_CAMP828	CAMP828	UK	England	Oxford	2003	chicken	REFERENCE	828	ST-828 complex	0
60467	60467_CAMP2016	CAMP2016	UK			2006	human	REFERENCE	2016	C. coli clade 2	0
60471	60471_CAMP2326	CAMP2326	UK	Scotland		2001	chicken	REFERENCE	2326	C. coli clade 2	0
60484	60484_CAMP886	CAMP886	UK	England	Oxford	2004	pig	REFERENCE	887	ST-828 complex	0
60485	60485_CAMP3667	CAMP3667	UK	England		2005	chicken	REFERENCE	3667	ST-1150 complex	0
60486	60486_CAMP3129	CAMP3129	UK	England	Oxford	2004	chicken	REFERENCE	8320	ST-828 complex	0
60488	60488_CAMP1487	CAMP1487	UK	Scotland		2006	human	REFERENCE		ST-1150 complex	0
60535	60535_CAMP3311	CAMP3311	UK			2003	chicken	REFERENCE	3311	ST-828 complex clade 1	0
60618	60618_CAMP3136	CAMP3136	UK	Scotland		2005	human	REFERENCE		ST-1150 complex	0
60628	60628_CAMP2696	CAMP2696	UK	Scotland		2006	pig	REFERENCE	2696	ST-828 complex	0
60641	60641_CAMP1670	CAMP1670	USA			2001	human	REFERENCE	1670	C. coli clade 3	0
60647	60647_CAMP1643	CAMP1643	USA			2000	human	REFERENCE	1643	C. coli clade 3	0
105577	105577_PA010	PA010	Peru	Loreto	Iquitos	2019	chicken	commercial	10234	ST-828 complex	0
105578	105578_PA017	PA017	Peru	Loreto	Iquitos	2019	chicken	commercial	10294	ST-828 complex	0
105579	105579_PA026	PA026	Peru	Loreto	Iquitos	2019	chicken	commercial	10295	ST-828 complex	0
105580	105580_PA028	PA028	Peru	Loreto	Iquitos	2019	chicken	commercial	10295	ST-828 complex	0
105581	105581_PA029	PA029	Peru	Loreto	Iquitos	2019	chicken	commercial	10295	ST-828 complex	0
105583	105583_PA031	PA031	Peru	Loreto	Iquitos	2019	chicken	commercial	10299	ST-1150 complex	0
105584	105584_PA032	PA032	Peru	Loreto	Iquitos	2019	chicken	commercial	8408	ST-828 complex	0
105585	105585_PA033	PA033	Peru	Loreto	Iquitos	2019	chicken	commercial	10299	ST-1150 complex	0
105586	105586_PA034	PA034	Peru	Loreto	Iquitos	2019	chicken	commercial	8408	ST-828 complex	0
105587	105587_PA040	PA040	Peru	Loreto	Iquitos	2019	chicken	commercial	10301	ST-1150 complex	0
105590	105590_PA048	PA048	Peru	Loreto	Iquitos	2019	chicken	commercial	10295	ST-828 complex	0
105593	105593_PA061	PA061	Peru	Loreto	Iquitos	2019	chicken	commercial	10295	ST-828 complex	0
105594	105594_PA062	PA062	Peru	Loreto	Iquitos	2019	chicken	commercial	10295	ST-828 complex	0
105597	105597_PA065	PA065	Peru	Loreto	Iquitos	2019	chicken	commercial	10295	ST-828 complex	0
105601	105601_PA070	PA070	Peru	Loreto	Iquitos	2019	chicken	commercial	10295	ST-828 complex	0
105614	105614_PA093	PA093	Peru	Loreto	Iquitos	2019	chicken	commercial	825	ST-828 complex	0
105616	105616_PV004	PV004	Peru	Loreto	Iquitos	2019	chicken	backyard	10234	ST-828 complex	0
105636	105636_PV086	PV086	Peru	Loreto	Iquitos	2019	chicken	backyard	1173	ST-828 complex	0
105640	105640_PV091	PV091	Peru	Loreto	Iquitos	2019	chicken	backyard	1055	ST-828 complex	0
105642	105642_PV093	PV093	Peru	Loreto	Iquitos	2019	chicken	backyard	1055	ST-828 complex	0
105746	105746_cerdo_0_1_C1	cerdo_0.1_C1	Peru	Loreto	Iquitos	2019	pig	commercial	1826	ST-828 complex	0
105747	105747_cerdo_0_1_C2	cerdo_0.1_C2	Peru	Loreto	Iquitos	2019	pig	commercial	1826	ST-828 complex	0
108479	108479_3070	SHI007318	Peru	Loreto	Iquitos	2013	human	asymptomatic	1173	ST-828 complex	0
108481	108481_3072	SHI007480	Peru	Loreto	Iquitos	2013	human	gastroenteritis	1173	ST-828 complex	0
108483	108483_3074	SHI008707	Peru	Loreto	Iquitos	2013	human	Unknown	1173	ST-828 complex	0
108486	108486_3077	SHI009257	Peru	Loreto	Iquitos	2013	human	asymptomatic	1173	ST-828 complex	0
108491	108491_3082	SHI010196	Peru	Loreto	Iquitos	2013	human	gastroenteritis	1173	ST-828 complex	0
108492	108492_3083	SHI010245	Peru	Loreto	Iquitos	2013	human	gastroenteritis	1173	ST-828 complex	0
108494	108494_3085	SHI010658	Peru	Loreto	Iquitos	2013	human	asymptomatic	1055	ST-828 complex	0
108498	108498_3089	SHI007637	Peru	Loreto	Iquitos	2013	human	asymptomatic	825	ST-828 complex	0
108504	108504_3095	SHI003674	Peru	Loreto	Iquitos	2013	human	gastroenteritis	829	ST-828 complex	0
108508	108508_3099	SHI008867	Peru	Loreto	Iquitos	2013	human	gastroenteritis	1173	ST-828 complex	0
108524	108524_3325	SHI004947	Peru	Loreto	Iquitos	2013	human	asymptomatic	829	ST-828 complex	0
108528	108528_3330	SHI006326	Peru	Loreto	Iquitos	2013	human	asymptomatic	12696	ST-1150 complex	0
108546	108546_3348	SHI010168	Peru	Loreto	Iquitos	2013	human	gastroenteritis	2256	ST-828 complex	0
112371	112371_CAM000139_1663	CAM000139-1663	Peru	Loreto	Iquitos	2021	human	gastroenteritis	11957	ST-828 complex	2
112373	112373_CAM000172_1677	CAM000172-1677	Peru	Loreto	Iquitos	2021	chicken	backyard	11957	ST-828 complex	0
112375	112375_CAM000174_1681	CAM000174-1681	Peru	Loreto	Iquitos	2021	chicken	backyard	11957	ST-828 complex	0
112382	112382_CAM000431_2057	CAM000431-2057	Peru	Loreto	Iquitos	2021	human	gastroenteritis	11959	ST-1150 complex	1
112386	112386_CAM000610_3274	CAM000610-3274	Peru	Loreto	Iquitos	2021	chicken	backyard	11960	ST-828 complex	0
112388	112388_CAM000646_3224	CAM000646-3224	Peru	Loreto	Iquitos	2021	human	gastroenteritis	11961	ST-1150 complex	0
112390	112390_CAM000717_3776	CAM000717-3776	Peru	Loreto	Iquitos	2022	human	gastroenteritis	11963	ST-1150 complex	3
112397	112397_CAM000968_4777	CAM000968-4777	Peru	Loreto	Iquitos	2022	human	asymptomatic	829	ST-828 complex	0
112398	112398_CAM000974_4799	CAM000974-4799	Peru	Loreto	Iquitos	2022	chicken	backyard	11965	ST-828 complex	0
112421	112421_CAA00143_00202	CAA00143-00202	Peru	Loreto	Iquitos	2022	chicken	commercial	8408	ST-828 complex	0
112422	112422_CAA00151_00250	CAA00151-00250	Peru	Loreto	Iquitos	2022	chicken	commercial	11961	ST-1150 complex	0
112424	112424_CAA00154_00272	CAA00154-00272	Peru	Loreto	Iquitos	2022	chicken	commercial	11967	ST-1150 complex	0
112425	112425_CAA00165_00386	CAA00165-00386	Peru	Loreto	Iquitos	2022	chicken	commercial	11968	ST-1150 complex	0
112427	112427_DVHRF0105_002720	DVHRF0105-002720	Peru	Loreto	Iquitos	2019	human	gastroenteritis	829	ST-828 complex	0
112431	112431_DVHRF0580_002745	DVHRF0580-002745	Peru	Loreto	Iquitos	2021	human	gastroenteritis	3858	ST-828 complex	0
112432	112432_DVHRF0731_002798	DVHRF0731-002798	Peru	Loreto	Iquitos	2021	human	gastroenteritis	10266	ST-828 complex	0
112434	112434_DVHRF0741_002767	DVHRF0741-002767	Peru	Loreto	Iquitos	2021	human	gastroenteritis	1082	ST-828 complex	0
112436	112436_DVHRF0814_002875	DVHRF0814-002875	Peru	Loreto	Iquitos	2021	human	gastroenteritis	11963	ST-1150 complex	0
112437	112437_DVHRF0816_002867	DVHRF0816-002867	Peru	Loreto	Iquitos	2021	human	gastroenteritis	11963	ST-1150 complex	0
112451	112451_PE1008428	PE1008428	Peru	Loreto	Iquitos	2012	human	asymptomatic	10266	ST-828 complex	0
112453	112453_PE1012031	PE1012031	Peru	Loreto	Iquitos	2013	human	asymptomatic	10250	ST-828 complex	0
112454	112454_PE1012321	PE1012321	Peru	Loreto	Iquitos	2013	human	gastroenteritis	10234	ST-828 complex	2
112455	112455_PE1013722	PE1013722	Peru	Loreto	Iquitos	2013	human	asymptomatic	829	ST-828 complex	0
113204	113204_CAM001347_007288	CAM001347-007288	Peru	Loreto	Iquitos	2022	human	asymptomatic	1055	ST-828 complex	0
113205	113205_CAM001351_007295	CAM001351-007295	Peru	Loreto	Iquitos	2022	human	gastroenteritis	1055	ST-828 complex	1
113212	113212_CAM001500_007360	CAM001500-007360	Peru	Loreto	Iquitos	2022	human	asymptomatic	1055	ST-828 complex	0
113214	113214_CAM001567_007762	CAM001567-007762	Peru	Loreto	Iquitos	2022	human	asymptomatic	10266	ST-828 complex	0
113217	113217_CAM001627_007784	CAM001627-007784	Peru	Loreto	Iquitos	2022	human	asymptomatic	11961	ST-1150 complex	0
113218	113218_CAM001640_008116	CAM001640-008116	Peru	Loreto	Iquitos	2022	human	asymptomatic	12285	ST-828 complex	0
113220	113220_CAM001666_008132	CAM001666-008132	Peru	Loreto	Iquitos	2022	human	asymptomatic	1055	ST-828 complex	0
113221	113221_CAM001698_008146	CAM001698-008146	Peru	Loreto	Iquitos	2022	human	asymptomatic	12285	ST-828 complex	0
113222	113222_CAM001710_008155	CAM001710-008155	Peru	Loreto	Iquitos	2022	human	asymptomatic	1055	ST-828 complex	0
113223	113223_CAM001748_009681	CAM001748-009681	Peru	Loreto	Iquitos	2022	human	gastroenteritis	11961	ST-1150 complex	2
114263	114263_CAA00292_000675	CAA00292-000675	Peru	Loreto	Iquitos	2022	chicken	commercial	825	ST-828 complex	0
114264	114264_CAA00293_000668	CAA00293-000668	Peru	Loreto	Iquitos	2022	chicken	commercial	825	ST-828 complex	0
114267	114267_CAA00297_000740	CAA00297-000740	Peru	Loreto	Iquitos	2022	chicken	commercial	825	ST-828 complex	0
114268	114268_CAA00299_000757	CAA00299-000757	Peru	Loreto	Iquitos	2022	chicken	commercial	11961	ST-1150 complex	0
114270	114270_CAA00300_000766	CAA00300-000766	Peru	Loreto	Iquitos	2022	chicken	commercial	12297	ST-1150 complex	0
114272	114272_CAA00303_000795	CAA00303-000795	Peru	Loreto	Iquitos	2022	chicken	commercial	12298	ST-1150 complex	0
114273	114273_CAA00304_000816	CAA00304-000816	Peru	Loreto	Iquitos	2022	chicken	commercial	12298	ST-1150 complex	0
114275	114275_CAA00306_000830	CAA00306-000830	Peru	Loreto	Iquitos	2022	chicken	commercial	10617	ST-828 complex	0
114277	114277_CAA00311_000862	CAA00311-000862	Peru	Loreto	Iquitos	2022	chicken	commercial	12298	ST-1150 complex	0
114279	114279_CAA00316_001083	CAA00316-001083	Peru	Loreto	Iquitos	2022	chicken	commercial	8408	ST-828 complex	0
114280	114280_CAA00318_001091	CAA00318-001091	Peru	Loreto	Iquitos	2022	chicken	commercial	10617	ST-828 complex	0
114281	114281_CAA00319_001095	CAA00319-001095	Peru	Loreto	Iquitos	2022	chicken	commercial	10617	ST-828 complex	0
114282	114282_CAA00322_001096	CAA00322-001096	Peru	Loreto	Iquitos	2022	chicken	commercial	10617	ST-828 complex	0
114292	114292_CAA00335_001194	CAA00335-001194	Peru	Loreto	Iquitos	2022	chicken	commercial	825	ST-828 complex	0
114293	114293_CAA00336_001202	CAA00336-001202	Peru	Loreto	Iquitos	2022	chicken	commercial	12285	ST-828 complex	0
115883	115883_CAM001343_007282	CAM001343-007282	Peru	Loreto	Iquitos	2022	human	gastroenteritis	1055	ST-828 complex	0
115928	115928_PE1002465	PE1002465	Peru	Loreto	Iquitos	2011	human	asymptomatic	829	ST-828 complex	0
115929	115929_PE1002984	PE1002984	Peru	Loreto	Iquitos	2011	human	asymptomatic	10236	ST-1150 complex	0
115930	115930_PE1003845	PE1003845	Peru	Loreto	Iquitos	2011	human	asymptomatic	829	ST-828 complex	0
115931	115931_PE1004094	PE1004094	Peru	Loreto	Iquitos	2011	human	asymptomatic	825	ST-828 complex	0
115932	115932_PE1004747	PE1004747	Peru	Loreto	Iquitos	2011	human	asymptomatic	10234	ST-828 complex	0
115933	115933_PE1006339	PE1006339	Peru	Loreto	Iquitos	2012	human	asymptomatic	10250	ST-828 complex	0
115934	115934_PE1006365	PE1006365	Peru	Loreto	Iquitos	2012	human	asymptomatic	12394	ST-828 complex	0
115935	115935_PE1006426	PE1006426	Peru	Loreto	Iquitos	2012	human	asymptomatic	10266	ST-828 complex	0
115936	115936_PE1006490	PE1006490	Peru	Loreto	Iquitos	2012	human	asymptomatic	902	ST-828 complex	0
115937	115937_PE1006723	PE1006723	Peru	Loreto	Iquitos	2012	human	asymptomatic	825	ST-828 complex	0
115938	115938_PE1006864	PE1006864	Peru	Loreto	Iquitos	2012	human	asymptomatic	825	ST-828 complex	0
115939	115939_PE1007082	PE1007082	Peru	Loreto	Iquitos	2012	human	asymptomatic	1497	ST-828 complex	0
115940	115940_PE1007356	PE1007356	Peru	Loreto	Iquitos	2012	human	asymptomatic	10248	ST-828 complex	0
115941	115941_PE1007381	PE1007381	Peru	Loreto	Iquitos	2012	human	asymptomatic	10234	ST-828 complex	0
115942	115942_PE1007449	PE1007449	Peru	Loreto	Iquitos	2012	human	asymptomatic	825	ST-828 complex	0
115943	115943_PE1007476	PE1007476	Peru	Loreto	Iquitos	2012	human	asymptomatic	825	ST-828 complex	0
115944	115944_PE1007691	PE1007691	Peru	Loreto	Iquitos	2012	human	asymptomatic	10259	ST-1150 complex	0
115945	115945_PE1007966	PE1007966	Peru	Loreto	Iquitos	2012	human	asymptomatic	1497	ST-828 complex	0
115946	115946_PE1008376	PE1008376	Peru	Loreto	Iquitos	2012	human	gastroenteritis	10266	ST-828 complex	4
115947	115947_PE1008575	PE1008575	Peru	Loreto	Iquitos	2012	human	gastroenteritis	10252	ST-1150 complex	2
115948	115948_PE1008592	PE1008592	Peru	Loreto	Iquitos	2012	human	asymptomatic	825	ST-828 complex	0
115949	115949_PE1008668	PE1008668	Peru	Loreto	Iquitos	2012	human	asymptomatic	831	ST-828 complex	0
115950	115950_PE1008723	PE1008723	Peru	Loreto	Iquitos	2012	human	asymptomatic	829	ST-828 complex	0
115951	115951_PE1008776	PE1008776	Peru	Loreto	Iquitos	2012	human	asymptomatic	6275	ST-828 complex	0
115952	115952_PE1008805	PE1008805	Peru	Loreto	Iquitos	2012	human	asymptomatic	830	ST-828 complex	0
115953	115953_PE1008831	PE1008831	Peru	Loreto	Iquitos	2012	human	gastroenteritis	825	ST-828 complex	6
115954	115954_PE1008862	PE1008862	Peru	Loreto	Iquitos	2012	human	asymptomatic	10257	ST-1150 complex	0
115955	115955_PE1008890	PE1008890	Peru	Loreto	Iquitos	2012	human	asymptomatic	825	ST-828 complex	0
115956	115956_PE1008972	PE1008972	Peru	Loreto	Iquitos	2012	human	asymptomatic	825	ST-828 complex	0
115957	115957_PE1009079	PE1009079	Peru	Loreto	Iquitos	2012	human	asymptomatic	10234	ST-828 complex	0
115958	115958_PE1009156	PE1009156	Peru	Loreto	Iquitos	2012	human	asymptomatic	1497	ST-828 complex	0
115959	115959_PE1009159	PE1009159	Peru	Loreto	Iquitos	2012	human	asymptomatic	829	ST-828 complex	0
115960	115960_PE1009160	PE1009160	Peru	Loreto	Iquitos	2012	human	asymptomatic	1173	ST-828 complex	0
115961	115961_PE1009428	PE1009428	Peru	Loreto	Iquitos	2012	human	asymptomatic	10234	ST-828 complex	0
115962	115962_PE1009439	PE1009439	Peru	Loreto	Iquitos	2012	human	asymptomatic	1497	ST-828 complex	0
115963	115963_PE1009684	PE1009684	Peru	Loreto	Iquitos	2012	human	asymptomatic	10240	ST-1150 complex	0
115964	115964_PE1009978	PE1009978	Peru	Loreto	Iquitos	2012	human	asymptomatic	1497	ST-828 complex	0
115965	115965_PE1010102	PE1010102	Peru	Loreto	Iquitos	2012	human	asymptomatic	10238	ST-1150 complex	0
115966	115966_PE1010256	PE1010256	Peru	Loreto	Iquitos	2012	human	asymptomatic	10234	ST-828 complex	0
115967	115967_PE1011000	PE1011000	Peru	Loreto	Iquitos	2013	human	gastroenteritis	825	ST-828 complex	3
115968	115968_PE1011016	PE1011016	Peru	Loreto	Iquitos	2013	human	asymptomatic	8737	ST-828 complex	0
115969	115969_PE1011046	PE1011046	Peru	Loreto	Iquitos	2013	human	gastroenteritis	10260	ST-828 complex
115970	115970_PE1011852	PE1011852	Peru	Loreto	Iquitos	2013	human	gastroenteritis	10260	ST-828 complex
115971	115971_PE1011946	PE1011946	Peru	Loreto	Iquitos	2013	human	asymptomatic	829	ST-828 complex	0
115972	115972_PE1012319	PE1012319	Peru	Loreto	Iquitos	2013	human	asymptomatic	10234	ST-828 complex	0
115973	115973_PE1012587	PE1012587	Peru	Loreto	Iquitos	2013	human	asymptomatic	825	ST-828 complex	0
115974	115974_PE1012753	PE1012753	Peru	Loreto	Iquitos	2013	human	asymptomatic	10234	ST-828 complex	0
115975	115975_PE1013325	PE1013325	Peru	Loreto	Iquitos	2013	human	asymptomatic	12395	ST-828 complex	0
115976	115976_PE1014576	PE1014576	Peru	Loreto	Iquitos	2014	human	asymptomatic	10274	ST-1150 complex	0
115977	115977_CAM000968_4783	CAM000968-4783	Peru	Loreto	Iquitos	2022	human	asymptomatic	829	ST-828 complex	0
115982	115982_CAM001666_008139	CAM001666-008139	Peru	Loreto	Iquitos	2022	human	asymptomatic	1055	ST-828 complex	0
115990	115990_CAM002101_010371	CAM002101-010371	Peru	Loreto	Iquitos	2022	human	asymptomatic	12397	ST-828 complex	0
115999	115999_CAM002734_017531	CAM002734-017531	Peru	Loreto	Iquitos	2022	human	asymptomatic	10234	ST-828 complex	0
116009	116009_CAM002448_012677	CAM002448-012677	Peru	Loreto	Iquitos	2022	chicken	backyard	10234	ST-828 complex	0
116313	116313_PE1008355_2	PE1008355_2	Peru	Loreto	Iquitos	2012	human	asymptomatic	825	ST-828 complex	0
118045	118045_CAA00837_002885	CAA00837-002885	Peru	Loreto	Iquitos	2023	chicken	commercial	13415	ST-828 complex	0
118046	118046_CAA00824_002909	CAA00824-002909	Peru	Loreto	Iquitos	2023	pig	commercial	13411	ST-828 complex	0
118049	118049_CAA01119_003666	CAA01119-003666	Peru	Loreto	Iquitos	2023	chicken	commercial	13415	ST-828 complex	0
118051	118051_CAA01203_003838	CAA01203-003838	Peru	Loreto	Iquitos	2023	chicken	commercial	13417	ST-1150 complex	0
118693	118693_EF0001035_001966	EF0001035-001966	Peru	Loreto	Iquitos	2022	human	gastroenteritis	13466	ST-828 complex	8
118694	118694_EF0001656_002930	EF0001656-002930	Peru	Loreto	Iquitos	2023	human	gastroenteritis	13467	ST-828 complex	6
143446	143446_CAA01206_003861	CAA01206-003861	Peru	Loreto	Iquitos	2023	chicken	commercial	13417	ST-1150 complex	0
143447	143447_CAA01206_003863	CAA01206-003863	Peru	Loreto	Iquitos	2023	chicken	commercial	13417	ST-1150 complex	0
143448	143448_CAA01210_003906	CAA01210-003906	Peru	Loreto	Iquitos	2023	chicken	commercial	13417	ST-1150 complex	0
143452	143452_CAA00738_002538	CAA00738-002538	Peru	Loreto	Iquitos	2022	chicken	commercial	13536	ST-828 complex	0
143453	143453_CAA00776_002664	CAA00776-002664	Peru	Loreto	Iquitos	2022	chicken	commercial	13537	ST-1150 complex	0
143464	143464_DVHRF0929_003378	DVHRF0929-003378	Peru	Loreto	Iquitos	2022	human	gastroenteritis	1055	ST-828 complex	0
143475	143475_CAA01135_003680	CAA01135-003680	Peru	Loreto	Iquitos	2023	pig	commercial	13415	ST-828 complex	0
143476	143476_CAA01136_003682	CAA01136-003682	Peru	Loreto	Iquitos	2023	pig	commercial	13415	ST-828 complex	0
143477	143477_CAA01136_003684	CAA01136-003684	Peru	Loreto	Iquitos	2023	pig	commercial	13415	ST-828 complex	0
143478	143478_CAA01136_003688	CAA01136-003688	Peru	Loreto	Iquitos	2023	pig	commercial	13415	ST-828 complex	0
143479	143479_CAM007473_41029	CAM007473-41029	Peru	Loreto	Iquitos	2023	chicken	backyard	13542	ST-1150 complex	0
143480	143480_CAM007473_41031	CAM007473-41031	Peru	Loreto	Iquitos	2023	chicken	backyard	13542	ST-1150 complex	0
143481	143481_CAM007473_41032	CAM007473-41032	Peru	Loreto	Iquitos	2023	chicken	backyard	13542	ST-1150 complex	0
143482	143482_CAM007739_41904	CAM007739-41904	Peru	Loreto	Iquitos	2023	chicken	backyard	13543	ST-828 complex	0
143483	143483_CAM007740_41919	CAM007740-41919	Peru	Loreto	Iquitos	2023	chicken	backyard	13543	ST-828 complex	0
143484	143484_CAM007741_41913	CAM007741-41913	Peru	Loreto	Iquitos	2023	chicken	backyard	13543	ST-828 complex	0
143485	143485_CAA00774_002646	CAA00774-002646	Peru	Loreto	Iquitos	2023	chicken	commercial	13537	ST-1150 complex	0
143486	143486_CAA00785_002800	CAA00785-002800	Peru	Loreto	Iquitos	2023	chicken	commercial	13537	ST-1150 complex	0
143821	143821_CAM000431_042966	CAM000431-042966	Peru	Loreto	Iquitos	2021	human	gastroenteritis	11959	ST-1150 complex	1
143822	143822_CAM000431_042967	CAM000431-042967	Peru	Loreto	Iquitos	2021	human	gastroenteritis	11959	ST-1150 complex	1
143823	143823_CAM000431_042968	CAM000431-042968	Peru	Loreto	Iquitos	2021	human	gastroenteritis	11959	ST-1150 complex	1
143824	143824_CAM000646_003220	CAM000646-003220	Peru	Loreto	Iquitos	2021	human	gastroenteritis	11961	ST-1150 complex	0
143825	143825_CAM000646_003226	CAM000646-003226	Peru	Loreto	Iquitos	2021	human	gastroenteritis	11961	ST-1150 complex	0
143826	143826_CAM000646_003230	CAM000646-003230	Peru	Loreto	Iquitos	2021	human	gastroenteritis	11961	ST-1150 complex	0
143827	143827_CAM001347_007285	CAM001347-007285	Peru	Loreto	Iquitos	2022	human	asymptomatic	1055	ST-828 complex	0
143828	143828_CAM001347_007287	CAM001347-007287	Peru	Loreto	Iquitos	2022	human	asymptomatic	1055	ST-828 complex	0
143829	143829_CAM001347_007289	CAM001347-007289	Peru	Loreto	Iquitos	2022	human	asymptomatic	1055	ST-828 complex	0
143830	143830_CAM001351_007291	CAM001351-007291	Peru	Loreto	Iquitos	2022	human	gastroenteritis	1055	ST-828 complex	1
143831	143831_CAM001351_007297	CAM001351-007297	Peru	Loreto	Iquitos	2022	human	gastroenteritis	1055	ST-828 complex	1
143832	143832_CAM001351_007298	CAM001351-007298	Peru	Loreto	Iquitos	2022	human	gastroenteritis	1055	ST-828 complex	1
143833	143833_CAM001500_007358	CAM001500-007358	Peru	Loreto	Iquitos	2022	human	asymptomatic	1055	ST-828 complex	0
143834	143834_CAM001500_007361	CAM001500-007361	Peru	Loreto	Iquitos	2022	human	asymptomatic	1055	ST-828 complex	0
143835	143835_CAM001567_007755	CAM001567-007755	Peru	Loreto	Iquitos	2022	human	asymptomatic	10266	ST-828 complex	0
143836	143836_CAM001567_007759	CAM001567-007759	Peru	Loreto	Iquitos	2022	human	asymptomatic	10266	ST-828 complex	0
143837	143837_CAM001567_007761	CAM001567-007761	Peru	Loreto	Iquitos	2022	human	asymptomatic	10266	ST-828 complex	0
143838	143838_CAM001627_007779	CAM001627-007779	Peru	Loreto	Iquitos	2022	human	asymptomatic	11961	ST-1150 complex	0
143839	143839_CAM001627_007785	CAM001627-007785	Peru	Loreto	Iquitos	2022	human	asymptomatic	11961	ST-1150 complex	0
143840	143840_CAM001627_007786	CAM001627-007786	Peru	Loreto	Iquitos	2022	human	asymptomatic	11961	ST-1150 complex	0
143841	143841_CAM001666_008136	CAM001666-008136	Peru	Loreto	Iquitos	2022	human	asymptomatic	1055	ST-828 complex	0
143842	143842_CAM001666_008138	CAM001666-008138	Peru	Loreto	Iquitos	2022	human	asymptomatic	1055	ST-828 complex	0
143843	143843_CAM001698_008144	CAM001698-008144	Peru	Loreto	Iquitos	2022	human	asymptomatic	12285	ST-828 complex	0
143844	143844_CAM001698_008147	CAM001698-008147	Peru	Loreto	Iquitos	2022	human	asymptomatic	12285	ST-828 complex	0
143845	143845_CAM001710_008154	CAM001710-008154	Peru	Loreto	Iquitos	2022	human	asymptomatic	1055	ST-828 complex	0
143846	143846_CAM001748_009676	CAM001748-009676	Peru	Loreto	Iquitos	2022	human	gastroenteritis	11961	ST-1150 complex	2
143847	143847_CAM001748_009680	CAM001748-009680	Peru	Loreto	Iquitos	2022	human	gastroenteritis	11961	ST-1150 complex	2
143848	143848_CAM002101_041253	CAM002101-041253	Peru	Loreto	Iquitos	2022	human	asymptomatic	12397	ST-828 complex	0
143849	143849_CAM002101_041254	CAM002101-041254	Peru	Loreto	Iquitos	2022	human	asymptomatic	12397	ST-828 complex	0
143850	143850_CAM002101_041256	CAM002101-041256	Peru	Loreto	Iquitos	2022	human	asymptomatic	12397	ST-828 complex	0
143851	143851_CAM002101_041259	CAM002101-041259	Peru	Loreto	Iquitos	2022	human	asymptomatic	12397	ST-828 complex	0
143852	143852_CAM002734_017529	CAM002734-017529	Peru	Loreto	Iquitos	2022	human	asymptomatic	10234	ST-828 complex	0
143853	143853_CAM002734_017532	CAM002734-017532	Peru	Loreto	Iquitos	2022	human	asymptomatic	10234	ST-828 complex	0
143854	143854_CAM002734_018674	CAM002734-018674	Peru	Loreto	Iquitos	2022	human	asymptomatic	10234	ST-828 complex	0
143855	143855_CAM003626_021733	CAM003626-021733	Peru	Loreto	Iquitos	2022	human	gastroenteritis	13857	ST-828 complex	5
143856	143856_CAM003950_023176	CAM003950-023176	Peru	Loreto	Iquitos	2022	human	gastroenteritis	1082	ST-828 complex	3
143858	143858_CAM004253_025178	CAM004253-025178	Peru	Loreto	Iquitos	2022	human	gastroenteritis	13867	ST-1150 complex	5
143859	143859_CAM004253_025179	CAM004253-025179	Peru	Loreto	Iquitos	2022	human	gastroenteritis	13867	ST-1150 complex	5
143860	143860_CAM004253_025180	CAM004253-025180	Peru	Loreto	Iquitos	2022	human	gastroenteritis	13867	ST-1150 complex	5
143862	143862_CAM004281_025190	CAM004281-025190	Peru	Loreto	Iquitos	2022	human	gastroenteritis	13855	ST-1150 complex	3
143863	143863_CAM004678_027508	CAM004678-027508	Peru	Loreto	Iquitos	2022	human	gastroenteritis	10266	ST-828 complex	1
143864	143864_CAM004678_027509	CAM004678-027509	Peru	Loreto	Iquitos	2022	human	gastroenteritis	10266	ST-828 complex	1
143865	143865_CAM004678_027510	CAM004678-027510	Peru	Loreto	Iquitos	2022	human	gastroenteritis	10266	ST-828 complex	1
143866	143866_CAM004678_027515	CAM004678-027515	Peru	Loreto	Iquitos	2022	human	gastroenteritis	10266	ST-828 complex	1
143867	143867_CAM005120_029797	CAM005120-029797	Peru	Loreto	Iquitos	2022	human	gastroenteritis	10234	ST-828 complex	0
143868	143868_CAM005120_029798	CAM005120-029798	Peru	Loreto	Iquitos	2022	human	gastroenteritis	10234	ST-828 complex	0
143869	143869_CAM005243_030700	CAM005243-030700	Peru	Loreto	Iquitos	2022	human	gastroenteritis	13855	ST-1150 complex	0
143870	143870_CAM005243_030702	CAM005243-030702	Peru	Loreto	Iquitos	2022	human	gastroenteritis	13855	ST-1150 complex	0
143871	143871_CAM005243_030703	CAM005243-030703	Peru	Loreto	Iquitos	2022	human	gastroenteritis	13855	ST-1150 complex	0
143872	143872_CAM005243_030704	CAM005243-030704	Peru	Loreto	Iquitos	2022	human	gastroenteritis	13855	ST-1150 complex	0
143873	143873_CAM005353_031608	CAM005353-031608	Peru	Loreto	Iquitos	2022	human	gastroenteritis	13855	ST-1150 complex	3
143874	143874_CAM005353_031610	CAM005353-031610	Peru	Loreto	Iquitos	2022	human	gastroenteritis	13855	ST-1150 complex	3
143875	143875_CAM005353_031611	CAM005353-031611	Peru	Loreto	Iquitos	2022	human	gastroenteritis	13855	ST-1150 complex	3
143876	143876_CAM005353_031612	CAM005353-031612	Peru	Loreto	Iquitos	2022	human	gastroenteritis	13855	ST-1150 complex	3
143877	143877_CAM005768_034178	CAM005768-034178	Peru	Loreto	Iquitos	2022	human	asymptomatic	1082	ST-828 complex	0
143878	143878_CAM005768_034181	CAM005768-034181	Peru	Loreto	Iquitos	2022	human	asymptomatic	1082	ST-828 complex	0
143879	143879_CAM005768_034182	CAM005768-034182	Peru	Loreto	Iquitos	2022	human	asymptomatic	1082	ST-828 complex	0
143880	143880_CAM005807_034194	CAM005807-034194	Peru	Loreto	Iquitos	2022	human	asymptomatic	1082	ST-828 complex	0
143881	143881_CAM005807_034196	CAM005807-034196	Peru	Loreto	Iquitos	2022	human	asymptomatic	1082	ST-828 complex	0
143882	143882_CAM005807_034197	CAM005807-034197	Peru	Loreto	Iquitos	2022	human	asymptomatic	1082	ST-828 complex	0
143883	143883_CAM005807_034198	CAM005807-034198	Peru	Loreto	Iquitos	2022	human	asymptomatic	1082	ST-828 complex	0
143884	143884_CAM005846_034212	CAM005846-034212	Peru	Loreto	Iquitos	2023	human	gastroenteritis	10295	ST-828 complex	0
143885	143885_CAM005846_034214	CAM005846-034214	Peru	Loreto	Iquitos	2023	human	gastroenteritis	10295	ST-828 complex	0
143886	143886_CAM006053_034669	CAM006053-034669	Peru	Loreto	Iquitos	2023	human	asymptomatic	11960	ST-828 complex	0
143887	143887_CAM006158_034687	CAM006158-034687	Peru	Loreto	Iquitos	2023	human	gastroenteritis	10295	ST-828 complex	0
143888	143888_CAM006435_037592	CAM006435-037592	Peru	Loreto	Iquitos	2023	human	gastroenteritis	1055	ST-828 complex	3
143889	143889_CAM006435_037594	CAM006435-037594	Peru	Loreto	Iquitos	2023	human	gastroenteritis	1055	ST-828 complex	3
143890	143890_CAM006435_037595	CAM006435-037595	Peru	Loreto	Iquitos	2023	human	gastroenteritis	1055	ST-828 complex	3
143891	143891_CAM006446_036794	CAM006446-036794	Peru	Loreto	Iquitos	2023	human	gastroenteritis	10295	ST-828 complex	2
143892	143892_CAM006446_036796	CAM006446-036796	Peru	Loreto	Iquitos	2023	human	gastroenteritis	10295	ST-828 complex	2
143893	143893_CAM006446_036848	CAM006446-036848	Peru	Loreto	Iquitos	2023	human	gastroenteritis	10295	ST-828 complex	2
143894	143894_CAM006516_037588	CAM006516-037588	Peru	Loreto	Iquitos	2023	human	gastroenteritis	3858	ST-828 complex	3
143895	143895_CAM006611_037546	CAM006611-037546	Peru	Loreto	Iquitos	2023	human	asymptomatic	13856	ST-1150 complex	0
143896	143896_CAM006611_037548	CAM006611-037548	Peru	Loreto	Iquitos	2023	human	asymptomatic	13856	ST-1150 complex	0
143897	143897_CAM006611_037549	CAM006611-037549	Peru	Loreto	Iquitos	2023	human	asymptomatic	13856	ST-1150 complex	0
143898	143898_CAM006758_038140	CAM006758-038140	Peru	Loreto	Iquitos	2023	human	gastroenteritis	1055	ST-828 complex	0
143899	143899_CAM006758_038141	CAM006758-038141	Peru	Loreto	Iquitos	2023	human	gastroenteritis	1055	ST-828 complex	0
143900	143900_CAM006758_038142	CAM006758-038142	Peru	Loreto	Iquitos	2023	human	gastroenteritis	1055	ST-828 complex	0
143901	143901_CAM007655_041223	CAM007655-041223	Peru	Loreto	Iquitos	2023	human	asymptomatic	10234	ST-828 complex	0
143902	143902_CAM007655_041224	CAM007655-041224	Peru	Loreto	Iquitos	2023	human	asymptomatic	10234	ST-828 complex	0
143903	143903_CAM007655_041227	CAM007655-041227	Peru	Loreto	Iquitos	2023	human	asymptomatic	10234	ST-828 complex	0
143904	143904_CAM007941_042842	CAM007941-042842	Peru	Loreto	Iquitos	2023	human	asymptomatic	1055	ST-828 complex	0
143905	143905_CAM007941_042844	CAM007941-042844	Peru	Loreto	Iquitos	2023	human	asymptomatic	1055	ST-828 complex	0
143906	143906_CAM007941_042845	CAM007941-042845	Peru	Loreto	Iquitos	2023	human	asymptomatic	1055	ST-828 complex	0
143907	143907_CAM007941_042847	CAM007941-042847	Peru	Loreto	Iquitos	2023	human	asymptomatic	1055	ST-828 complex	0
143908	143908_CAM008025_042854	CAM008025-042854	Peru	Loreto	Iquitos	2023	human	gastroenteritis	829	ST-828 complex	1
143909	143909_CAM008025_042856	CAM008025-042856	Peru	Loreto	Iquitos	2023	human	gastroenteritis	829	ST-828 complex	1
143910	143910_CAM008025_042858	CAM008025-042858	Peru	Loreto	Iquitos	2023	human	gastroenteritis	829	ST-828 complex	1
143911	143911_CAM008025_042859	CAM008025-042859	Peru	Loreto	Iquitos	2023	human	gastroenteritis	829	ST-828 complex	1
143912	143912_CAM008291_044708	CAM008291-044708	Peru	Loreto	Iquitos	2023	human	gastroenteritis	1055	ST-828 complex	0
143913	143913_CAM008291_044710	CAM008291-044710	Peru	Loreto	Iquitos	2023	human	gastroenteritis	1055	ST-828 complex	0
143914	143914_CAM008291_044712	CAM008291-044712	Peru	Loreto	Iquitos	2023	human	gastroenteritis	1055	ST-828 complex	0
143915	143915_CAM008291_044714	CAM008291-044714	Peru	Loreto	Iquitos	2023	human	gastroenteritis	1055	ST-828 complex	0
143916	143916_DVHRF0580_002746	DVHRF0580-002746	Peru	Loreto	Iquitos	2021	human	gastroenteritis	3858	ST-828 complex	0
143917	143917_DVHRF0731_002796	DVHRF0731-002796	Peru	Loreto	Iquitos	2021	human	gastroenteritis	10266	ST-828 complex	0
143918	143918_DVHRF0741_002771	DVHRF0741-002771	Peru	Loreto	Iquitos	2021	human	gastroenteritis	1082	ST-828 complex	0
143919	143919_DVHRF0814_002873	DVHRF0814-002873	Peru	Loreto	Iquitos	2021	human	gastroenteritis	11963	ST-1150 complex	0
143920	143920_DVHRF0814_002877	DVHRF0814-002877	Peru	Loreto	Iquitos	2021	human	gastroenteritis	11963	ST-1150 complex	0
143921	143921_DVHRF0814_002879	DVHRF0814-002879	Peru	Loreto	Iquitos	2021	human	gastroenteritis	11963	ST-1150 complex	0
143922	143922_DVHRF0816_002865	DVHRF0816-002865	Peru	Loreto	Iquitos	2021	human	gastroenteritis	11963	ST-1150 complex	0
143923	143923_DVHRF0816_002869	DVHRF0816-002869	Peru	Loreto	Iquitos	2021	human	gastroenteritis	11963	ST-1150 complex	0
143924	143924_DVHRF0816_002871	DVHRF0816-002871	Peru	Loreto	Iquitos	2021	human	gastroenteritis	11963	ST-1150 complex	0
143925	143925_DVHRF0929_003371	DVHRF0929-003371	Peru	Loreto	Iquitos	2022	human	gastroenteritis	1055	ST-828 complex	0
143926	143926_DVHRF0929_003372	DVHRF0929-003372	Peru	Loreto	Iquitos	2022	human	gastroenteritis	1055	ST-828 complex	0
143927	143927_DVHRF0929_003373	DVHRF0929-003373	Peru	Loreto	Iquitos	2022	human	gastroenteritis	1055	ST-828 complex	0
143928	143928_EF0000507_001100	EF0000507-001100	Peru	Loreto	Iquitos	2022	human	gastroenteritis	10266	ST-828 complex	6
143929	143929_EF0000507_001102	EF0000507-001102	Peru	Loreto	Iquitos	2022	human	gastroenteritis	10266	ST-828 complex	6
143930	143930_EF0000812_001394	EF0000812-001394	Peru	Loreto	Iquitos	2022	human	gastroenteritis	13864	ST-1150 complex	4
143931	143931_EF0001035_001965	EF0001035-001965	Peru	Loreto	Iquitos	2022	human	gastroenteritis	13466	ST-828 complex	8
143932	143932_EF0001035_001971	EF0001035-001971	Peru	Loreto	Iquitos	2022	human	gastroenteritis	13466	ST-828 complex	8
143933	143933_EF0001656_002928	EF0001656-002928	Peru	Loreto	Iquitos	2023	human	gastroenteritis	13467	ST-828 complex	6
143934	143934_EF0001656_002929	EF0001656-002929	Peru	Loreto	Iquitos	2023	human	gastroenteritis	13467	ST-828 complex	6
143935	143935_EF0001757_002998	EF0001757-002998	Peru	Loreto	Iquitos	2023	human	gastroenteritis	11961	ST-1150 complex	3
143936	143936_EF0001757_002999	EF0001757-002999	Peru	Loreto	Iquitos	2023	human	gastroenteritis	11961	ST-1150 complex	3
143937	143937_EF0001757_003000	EF0001757-003000	Peru	Loreto	Iquitos	2023	human	gastroenteritis	11961	ST-1150 complex	3
144444	144444_CAM004713_027523	CAM004713-027523	Peru	Loreto	Iquitos	2022	human	asymptomatic	10266	ST-828 complex	0
144446	144446_CAM006374_036199	CAM006374-036199	Peru	Loreto	Iquitos	2023	human	gastroenteritis	1055	ST-828 complex	3
144447	144447_CAM006378_036741	CAM006378-036741	Peru	Loreto	Iquitos	2023	human	asymptomatic	1055	ST-828 complex	0
144449	144449_PE1002367_000536	PE1002367_000536	Peru	Loreto	Iquitos	2011	human	gastroenteritis	10266	ST-828 complex	3
144450	144450_PE1003218_000796	PE1003218_000796	Peru	Loreto	Iquitos	2011	human	gastroenteritis	10250	ST-828 complex	2
144451	144451_PE1003450_000949	PE1003450_000949	Peru	Loreto	Iquitos	2011	human	gastroenteritis	10259	ST-1150 complex	3
144452	144452_PE1004172_001342	PE1004172_001342	Peru	Loreto	Iquitos	2011	human	asymptomatic	825	ST-828 complex	0
144453	144453_PE1006230_001885	PE1006230_001885	Peru	Loreto	Iquitos	2012	human	asymptomatic	829	ST-828 complex	0
144454	144454_PE1007350_002264	PE1007350_002264	Peru	Loreto	Iquitos	2012	human	asymptomatic	10266	ST-828 complex	0
144455	144455_PE1007823_002387	PE1007823_002387	Peru	Loreto	Iquitos	2012	human	asymptomatic	10234	ST-828 complex	0
144456	144456_PE1008232_002547	PE1008232_002547	Peru	Loreto	Iquitos	2012	human	asymptomatic	10266	ST-828 complex	0
144457	144457_PE1008357_002639	PE1008357_002639	Peru	Loreto	Iquitos	2012	human	asymptomatic	10260	ST-828 complex	0
144458	144458_PE1008764_002875	PE1008764_002875	Peru	Loreto	Iquitos	2012	human	gastroenteritis	10234	ST-828 complex	3
144460	144460_PE1009077_002981	PE1009077_002981	Peru	Loreto	Iquitos	2012	human	asymptomatic	1497	ST-828 complex	0
144461	144461_PE1009086c2	PE1009086c2	Peru	Loreto	Iquitos	2012	human	asymptomatic	10234	ST-828 complex	0
144462	144462_PE1009263_003049	PE1009263_003049	Peru	Loreto	Iquitos	2012	human	asymptomatic	825	ST-828 complex	0
144463	144463_PE1010254_003407	PE1010254_003407	Peru	Loreto	Iquitos	2012	human	asymptomatic	1497	ST-828 complex	0
144464	144464_PE1012550_004039	PE1012550_004039	Peru	Loreto	Iquitos	2013	human	asymptomatic	1173	ST-828 complex	0
144465	144465_PE1012579_004091	PE1012579_004091	Peru	Loreto	Iquitos	2013	human	asymptomatic	13893	ST-1150 complex	0
148688	148688_CAA01775_005382	CAA01775-005382	Peru	Loreto	Iquitos	2023	chicken	commercial	14163	ST-828 complex	0
148689	148689_CAA01721_005283	CAA01721-005283	Peru	Loreto	Iquitos	2023	cattle	commercial	14164	ST-828 complex	0
148690	148690_CAA01730_005289	CAA01730-005289	Peru	Loreto	Iquitos	2023	pig	commercial	14166	ST-828 complex	0
148691	148691_CAA01131_003650	CAA01131-003650	Peru	Loreto	Iquitos	2023	pig	commercial	14167	ST-828 complex	0
148692	148692_CAM010894_056319	CAM010894-056319	Peru	Loreto	Iquitos	2023	human	asymptomatic	829	ST-828 complex	0
148693	148693_CAM010905_056336	CAM010905-056336	Peru	Loreto	Iquitos	2023	human	gastroenteritis	13542	ST-1150 complex	1
148701	148701_CAM009518_051155	CAM009518-051155	Peru	Loreto	Iquitos	2023	human	gastroenteritis	13857	ST-828 complex	0
148702	148702_CAM009723_051589	CAM009723-051589	Peru	Loreto	Iquitos	2023	human	asymptomatic	13857	ST-828 complex	0
148708	148708_CAM011209_056645	CAM011209-056645	Peru	Loreto	Iquitos	2023	human	gastroenteritis	11963	ST-1150 complex	0
148709	148709_CAM011284_056739	CAM011284-056739	Peru	Loreto	Iquitos	2023	human	gastroenteritis	11963	ST-1150 complex	0
148724	148724_CAM009755_051721	CAM009755-051721	Peru	Loreto	Iquitos	2023	human	asymptomatic	829	ST-828 complex	0
148730	148730_CAM010139_052592	CAM010139-052592	Peru	Loreto	Iquitos	2023	human	gastroenteritis	10266	ST-828 complex	2
148731	148731_CAM010045_052602	CAM010045-052602	Peru	Loreto	Iquitos	2023	human	asymptomatic	1055	ST-828 complex	0
148735	148735_CAM010888_056330	CAM010888-056330	Peru	Loreto	Iquitos	2023	chicken	backyard	829	ST-828 complex	0
148737	148737_CAM009001_047499	CAM009001-047499	Peru	Loreto	Iquitos	2023	chicken	backyard	10266	ST-828 complex	0
148741	148741_CAM009158_048537	CAM009158-048537	Peru	Loreto	Iquitos	2023	human	asymptomatic	12298	ST-1150 complex	0
148746	148746_CAM009481_051141	CAM009481-051141	Peru	Loreto	Iquitos	2023	human	asymptomatic	12298	ST-1150 complex	0
148749	148749_CAM009610_051171	CAM009610-051171	Peru	Loreto	Iquitos	2023	human	asymptomatic	10294	ST-828 complex	0
148757	148757_CAM009435_049852	CAM009435-049852	Peru	Loreto	Iquitos	2023	human	asymptomatic	10294	ST-828 complex	0
148761	148761_CAM009671_051575	CAM009671-051575	Peru	Loreto	Iquitos	2023	human	gastroenteritis	10266	ST-828 complex	2
148771	148771_CAM010014_052579	CAM010014-052579	Peru	Loreto	Iquitos	2023	human	gastroenteritis	10294	ST-828 complex	3
148772	148772_CAM010036_052584	CAM010036-052584	Peru	Loreto	Iquitos	2023	human	asymptomatic	11961	ST-1150 complex	0
148773	148773_CAM010059_052554	CAM010059-052554	Peru	Loreto	Iquitos	2023	human	asymptomatic	825	ST-828 complex	0
148777	148777_CAM010180_053525	CAM010180-053525	Peru	Loreto	Iquitos	2023	human	gastroenteritis	12298	ST-1150 complex	5
148780	148780_CAM010286_053528	CAM010286-053528	Peru	Loreto	Iquitos	2023	human	gastroenteritis	12298	ST-1150 complex	5
148794	148794_CAM010650_054979	CAM010650-054979	Peru	Loreto	Iquitos	2023	human	asymptomatic	11957	ST-828 complex	0
148796	148796_CAM010574_054959	CAM010574-054959	Peru	Loreto	Iquitos	2023	chicken	backyard	11957	ST-828 complex	0
149094	149094_CAM010313_053544	CAM010313-053544	Peru	Loreto	Iquitos	2023	chicken	backyard	11963	ST-1150 complex	0
149097	149097_CAM010414_053589	CAM010414-053589	Peru	Loreto	Iquitos	2023	human	asymptomatic	825	ST-828 complex	0
149101	149101_CAM010483_053611	CAM010483-053611	Peru	Loreto	Iquitos	2023	human	gastroenteritis	11957	ST-828 complex	2
149102	149102_CAM010499_053618	CAM010499-053618	Peru	Loreto	Iquitos	2023	human	asymptomatic	10234	ST-828 complex	0
149105	149105_CAM010508_053633	CAM010508-053633	Peru	Loreto	Iquitos	2023	chicken	backyard	10234	ST-828 complex	0
149106	149106_CAM010510_053636	CAM010510-053636	Peru	Loreto	Iquitos	2023	chicken	backyard	10234	ST-828 complex	0
149203	149203_CAM013198_065590	CAM013198-065590	Peru	Loreto	Iquitos	2023	chicken	backyard	13466	ST-828 complex	0
149204	149204_CAM013266_067536	CAM013266-067536	Peru	Loreto	Iquitos	2023	human	asymptomatic	12297	ST-1150 complex	0
149206	149206_CAM013269_067550	CAM013269-067550	Peru	Loreto	Iquitos	2023	human	asymptomatic	12297	ST-1150 complex	0
149210	149210_CAM013585_067572	CAM013585-067572	Peru	Loreto	Iquitos	2023	human	asymptomatic	1055	ST-828 complex	0
149214	149214_CAM013691_067617	CAM013691-067617	Peru	Loreto	Iquitos	2023	human	asymptomatic	13417	ST-1150 complex	0
149218	149218_CAM013347_070681	CAM013347-070681	Peru	Loreto	Iquitos	2023	chicken	backyard	14191	ST-828 complex	0
149222	149222_CAM013777_067658	CAM013777-067658	Peru	Loreto	Iquitos	2023	human	asymptomatic	11957	ST-828 complex	0
149224	149224_CAM013833_067674	CAM013833-067674	Peru	Loreto	Iquitos	2023	human	asymptomatic	12285	ST-828 complex	0
149229	149229_CAM013855_067720	CAM013855-067720	Peru	Loreto	Iquitos	2023	human	asymptomatic	11965	ST-828 complex	0
149265	149265_CAM013988_069608	CAM013988-069608	Peru	Loreto	Iquitos	2023	human	asymptomatic	10266	ST-828 complex	0
149266	149266_CAM013993_069627	CAM013993-069627	Peru	Loreto	Iquitos	2023	human	asymptomatic	829	ST-828 complex	0
149268	149268_CAM014056_069646	CAM014056-069646	Peru	Loreto	Iquitos	2024	human	asymptomatic	11957	ST-828 complex	0
149270	149270_CAM014126_069672	CAM014126-069672	Peru	Loreto	Iquitos	2024	human	asymptomatic	8408	ST-828 complex	0
149272	149272_CAM014145_069688	CAM014145-069688	Peru	Loreto	Iquitos	2024	human	asymptomatic	829	ST-828 complex	0
149273	149273_CAM014146_069698	CAM014146-069698	Peru	Loreto	Iquitos	2024	human	asymptomatic	829	ST-828 complex	0
149274	149274_CAM014175_069702	CAM014175-069702	Peru	Loreto	Iquitos	2024	human	gastroenteritis	11957	ST-828 complex	0
149277	149277_CAM014205_069722	CAM014205-069722	Peru	Loreto	Iquitos	2024	human	gastroenteritis	829	ST-828 complex	1
149279	149279_CAM014283_069861	CAM014283-069861	Peru	Loreto	Iquitos	2024	human	gastroenteritis	829	ST-828 complex	1
149285	149285_CAM014231_069752	CAM014231-069752	Peru	Loreto	Iquitos	2024	chicken	backyard	825	ST-828 complex	0
149289	149289_CAM014433_070314	CAM014433-070314	Peru	Loreto	Iquitos	2024	human	asymptomatic	10234	ST-828 complex	0
149295	149295_CAM012287_061559	CAM012287-061559	Peru	Loreto	Iquitos	2023	human	asymptomatic	11965	ST-828 complex	0
149298	149298_CAM012415_061922	CAM012415-061922	Peru	Loreto	Iquitos	2023	human	asymptomatic	829	ST-828 complex	0
149304	149304_CAM012497_061949	CAM012497-061949	Peru	Loreto	Iquitos	2023	human	asymptomatic	829	ST-828 complex	0
149305	149305_CAM012501_061952	CAM012501-061952	Peru	Loreto	Iquitos	2023	human	asymptomatic	829	ST-828 complex	0
149306	149306_CAM012502_061960	CAM012502-061960	Peru	Loreto	Iquitos	2023	human	gastroenteritis	829	ST-828 complex	0
149312	149312_CAM012557_063034	CAM012557-063034	Peru	Loreto	Iquitos	2023	human	gastroenteritis	10234	ST-828 complex	1
149327	149327_CAM012860_063801	CAM012860-063801	Peru	Loreto	Iquitos	2023	chicken	backyard	14202	ST-828 complex	0
149328	149328_CAM012861_063819	CAM012861-063819	Peru	Loreto	Iquitos	2023	chicken	backyard	14202	ST-828 complex	0
149334	149334_CAA02376_006804	CAA02376-006804	Peru	Loreto	Iquitos	2023	cattle	commercial	1107	ST-828 complex	0
149335	149335_CAA02389_006806	CAA02389-006806	Peru	Loreto	Iquitos	2023	pig	commercial	14166	ST-828 complex	0
149336	149336_CAA02390_006813	CAA02390-006813	Peru	Loreto	Iquitos	2023	pig	commercial	14166	ST-828 complex	0
149337	149337_CAA02396_006818	CAA02396-006818	Peru	Loreto	Iquitos	2023	pig	commercial	854	ST-828 complex	0
149338	149338_CAA02396_006819	CAA02396-006819	Peru	Loreto	Iquitos	2023	pig	commercial	14166	ST-828 complex	0
149339	149339_CAA02401_006822	CAA02401-006822	Peru	Loreto	Iquitos	2023	pig	commercial	14166	ST-828 complex	0
149350	149350_CAA02441_007062	CAA02441-007062	Peru	Loreto	Iquitos	2023	chicken	commercial	14204	ST-1150 complex	0
149354	149354_CAA02473_007082	CAA02473-007082	Peru	Loreto	Iquitos	2023	cattle	commercial	14205	ST-828 complex	0
149355	149355_CAA02483_007084	CAA02483-007084	Peru	Loreto	Iquitos	2023	pig	commercial	2508	ST-828 complex	0
149356	149356_CAA02484_007088	CAA02484-007088	Peru	Loreto	Iquitos	2023	pig	commercial	13411	ST-828 complex	0
149357	149357_CAA02484_007090	CAA02484-007090	Peru	Loreto	Iquitos	2023	pig	commercial	1134	ST-828 complex	0
149358	149358_CAA02490_007097	CAA02490-007097	Peru	Loreto	Iquitos	2023	pig	commercial	14205	ST-828 complex	0
149359	149359_CAA02491_007102	CAA02491-007102	Peru	Loreto	Iquitos	2023	pig	commercial	1134	ST-828 complex	0
149360	149360_CAA02491_007106	CAA02491-007106	Peru	Loreto	Iquitos	2023	pig	commercial	14205	ST-828 complex	0
149364	149364_CAA02285_006461	CAA02285-006461	Peru	Loreto	Iquitos	2023	cattle	commercial	2715	ST-828 complex	0
149365	149365_CAA02290_006470	CAA02290-006470	Peru	Loreto	Iquitos	2023	cattle	commercial	14166	ST-828 complex	0
149366	149366_CAA02299_006475	CAA02299-006475	Peru	Loreto	Iquitos	2023	pig	commercial	13411	ST-828 complex	0
149368	149368_CAA02309_006499	CAA02309-006499	Peru	Loreto	Iquitos	2023	chicken	commercial	10294	ST-828 complex	0
149371	149371_CAA02315_006523	CAA02315-006523	Peru	Loreto	Iquitos	2023	chicken	commercial	8408	ST-828 complex	0
149375	149375_CAA02347_006720	CAA02347-006720	Peru	Loreto	Iquitos	2023	cattle	commercial	854	ST-828 complex	0
149376	149376_CAA02350_006722	CAA02350-006722	Peru	Loreto	Iquitos	2023	pig	commercial	14206	ST-828 complex	0
149377	149377_CAA02353_006726	CAA02353-006726	Peru	Loreto	Iquitos	2023	pig	commercial	2642	ST-828 complex	0
149378	149378_CAA02353_006728	CAA02353-006728	Peru	Loreto	Iquitos	2023	pig	commercial	14166	ST-828 complex	0
149379	149379_CAA02354_006732	CAA02354-006732	Peru	Loreto	Iquitos	2023	pig	commercial	14166	ST-828 complex	0
149380	149380_CAA02355_006736	CAA02355-006736	Peru	Loreto	Iquitos	2023	pig	commercial	14166	ST-828 complex	0
149381	149381_CAA02358_006746	CAA02358-006746	Peru	Loreto	Iquitos	2023	pig	commercial	8165	ST-828 complex	0
149384	149384_CAA02367_006768	CAA02367-006768	Peru	Loreto	Iquitos	2023	chicken	commercial	11957	ST-828 complex	0
149388	149388_CAA02144_006167	CAA02144-006167	Peru	Loreto	Iquitos	2023	cattle	commercial	2685	ST-828 complex	0
149391	149391_CAA02175_006278	CAA02175-006278	Peru	Loreto	Iquitos	2023	chicken	commercial	11957	ST-828 complex	0
149400	149400_CAA02254_006427	CAA02254-006427	Peru	Loreto	Iquitos	2023	cattle	commercial	2715	ST-828 complex	0
149401	149401_CAA02256_006435	CAA02256-006435	Peru	Loreto	Iquitos	2023	cattle	commercial	14166	ST-828 complex	0
149402	149402_CAA02272_006449	CAA02272-006449	Peru	Loreto	Iquitos	2023	pig	commercial	1450	ST-828 complex	0
149403	149403_CAA02272_006451	CAA02272-006451	Peru	Loreto	Iquitos	2023	pig	commercial	14205	ST-828 complex	0
149412	149412_CAM013129_065335	CAM013129-065335	Peru	Loreto	Iquitos	2023	chicken	backyard	11957	ST-828 complex	0
149416	149416_CAM013157_064968	CAM013157-064968	Peru	Loreto	Iquitos	2023	human	gastroenteritis	10234	ST-828 complex	1
149417	149417_CAM013173_064971	CAM013173-064971	Peru	Loreto	Iquitos	2023	human	gastroenteritis	10266	ST-828 complex	0
149418	149418_CAM013186_065337	CAM013186-065337	Peru	Loreto	Iquitos	2023	human	gastroenteritis	12297	ST-1150 complex	0
149421	149421_CAM013231_065364	CAM013231-065364	Peru	Loreto	Iquitos	2023	human	gastroenteritis	10266	ST-828 complex
149814	149814_CAM014515_070896	CAM014515-070896	Peru	Loreto	Iquitos	2024	human	asymptomatic	11957	ST-828 complex	0
149817	149817_CAM014551_070910	CAM014551-070910	Peru	Loreto	Iquitos	2024	human	gastroenteritis	10294	ST-828 complex	1
149818	149818_CAM014567_070918	CAM014567-070918	Peru	Loreto	Iquitos	2024	human	gastroenteritis	10236	ST-1150 complex	2
149820	149820_CAM014592_071442	CAM014592-071442	Peru	Loreto	Iquitos	2024	human	asymptomatic	8408	ST-828 complex	0
149821	149821_CAM014598_071448	CAM014598-071448	Peru	Loreto	Iquitos	2024	human	asymptomatic	10266	ST-828 complex	0
149822	149822_CAM014623_071460	CAM014623-071460	Peru	Loreto	Iquitos	2024	human	gastroenteritis	10266	ST-828 complex	2
149826	149826_CAM014661_071480	CAM014661-071480	Peru	Loreto	Iquitos	2024	human	gastroenteritis	8408	ST-828 complex	4
149830	149830_CAM014722_071766	CAM014722-071766	Peru	Loreto	Iquitos	2024	human	asymptomatic	11957	ST-828 complex	0
149834	149834_CAM014769_072090	CAM014769-072090	Peru	Loreto	Iquitos	2024	human	asymptomatic	829	ST-828 complex	0
149838	149838_CAM011385_057967	CAM011385-057967	Peru	Loreto	Iquitos	2023	human	gastroenteritis	11963	ST-1150 complex	0
149845	149845_CAM011530_058755	CAM011530-058755	Peru	Loreto	Iquitos	2023	human	asymptomatic	829	ST-828 complex	0
149848	149848_CAM011579_058673	CAM011579-058673	Peru	Loreto	Iquitos	2023	chicken	backyard	829	ST-828 complex	0
149852	149852_CAM011653_058891	CAM011653-058891	Peru	Loreto	Iquitos	2023	human	asymptomatic	11957	ST-828 complex	0
149854	149854_CAM011741_058849	CAM011741-058849	Peru	Loreto	Iquitos	2023	human	asymptomatic	10266	ST-828 complex	0
149859	149859_CAM011845_060167	CAM011845-060167	Peru	Loreto	Iquitos	2023	chicken	backyard	10234	ST-828 complex	0
149868	149868_CAM012093_061099	CAM012093-061099	Peru	Loreto	Iquitos	2023	human	asymptomatic	11961	ST-1150 complex	0
149869	149869_CAM012122_061101	CAM012122-061101	Peru	Loreto	Iquitos	2023	human	gastroenteritis	11961	ST-1150 complex	1
149872	149872_CAM012151_061131	CAM012151-061131	Peru	Loreto	Iquitos	2023	human	asymptomatic	825	ST-828 complex	0
149874	149874_CAM012161_061141	CAM012161-061141	Peru	Loreto	Iquitos	2023	human	gastroenteritis	825	ST-828 complex	0
149876	149876_CAM012216_061166	CAM012216-061166	Peru	Loreto	Iquitos	2023	human	asymptomatic	11965	ST-828 complex	0
149880	149880_EF0004656_008943	EF0004656-008943	Peru	Loreto	Iquitos	2023	human	gastroenteritis	825	ST-828 complex	8
149881	149881_EF0004777_008953	EF0004777-008953	Peru	Loreto	Iquitos	2023	human	gastroenteritis	829	ST-828 complex	12
149884	149884_CAL00119_500001	CAL00119-500001	Peru	Lima	Lima	2023	goat	commercial	10042	ST-828 complex	0
149885	149885_CAL00120_500011	CAL00120-500011	Peru	Lima	Lima	2023	goat	commercial	10042	ST-828 complex	0
149886	149886_CAL00129_500017	CAL00129-500017	Peru	Lima	Lima	2023	goat	commercial	10042	ST-828 complex	0
149887	149887_CAL00096_500038	CAL00096-500038	Peru	Lima	Lima	2023	chicken	commercial	8408	ST-828 complex	0
149888	149888_CAL00104_500058	CAL00104-500058	Peru	Lima	Lima	2023	chicken	commercial	13537	ST-1150 complex	0
149889	149889_CAL00105_500069	CAL00105-500069	Peru	Lima	Lima	2023	chicken	commercial	8408	ST-828 complex	0
149890	149890_CAL00103_500077	CAL00103-500077	Peru	Lima	Lima	2023	chicken	commercial	13537	ST-1150 complex	0
149891	149891_CAL00108_500084	CAL00108-500084	Peru	Lima	Lima	2023	chicken	commercial	13537	ST-1150 complex	0
149892	149892_CAL00109_500089	CAL00109-500089	Peru	Lima	Lima	2023	chicken	commercial	10042	ST-828 complex	0
149893	149893_CAL00112_500103	CAL00112-500103	Peru	Lima	Lima	2023	chicken	commercial	13537	ST-1150 complex	0
149896	149896_CAA01791_005480	CAA01791-005480	Peru	Loreto	Iquitos	2023	chicken	commercial	10266	ST-828 complex	0
149904	149904_CAA01820_005516	CAA01820-005516	Peru	Loreto	Iquitos	2023	cattle	commercial	14163	ST-828 complex	0
149905	149905_CAA01825_005525	CAA01825-005525	Peru	Loreto	Iquitos	2023	pig	commercial	11078	ST-828 complex	0
149906	149906_CAA01827_005533	CAA01827-005533	Peru	Loreto	Iquitos	2023	pig	commercial	11078	ST-828 complex	0
149907	149907_CAA01827_005530	CAA01827-005530	Peru	Loreto	Iquitos	2023	pig	commercial	14205	ST-828 complex	0
149909	149909_CAA01845_005704	CAA01845-005704	Peru	Loreto	Iquitos	2023	chicken	commercial	10266	ST-828 complex	0
149911	149911_CAA01857_005776	CAA01857-005776	Peru	Loreto	Iquitos	2023	pig	commercial	2715	ST-828 complex	0
149912	149912_CAA01865_005782	CAA01865-005782	Peru	Loreto	Iquitos	2023	pig	commercial	2642	ST-828 complex	0
149914	149914_CAA01925_005791	CAA01925-005791	Peru	Loreto	Iquitos	2023	cattle	commercial	10848	ST-828 complex	0
149915	149915_CAA01961_005802	CAA01961-005802	Peru	Loreto	Iquitos	2023	cattle	commercial	14164	ST-828 complex	0
149920	149920_CAA02053_006109	CAA02053-006109	Peru	Loreto	Iquitos	2023	pig	commercial	13411	ST-828 complex	0
149921	149921_CAA02114_006114	CAA02114-006114	Peru	Loreto	Iquitos	2023	pig	commercial	1055	ST-828 complex	0

## Sheet: Table_S2_genomes
Supplementary table S2: QC data of genomes used in this study
id	aspA	glnA	gltA	glyA	pgm	tkt	uncA	ST (MLST)	clonal_complex (MLST)	Contigs	Total length	Alleles designated	%Alleles designated	Loci tagged	%Loci tagged
24254	33	38	30	115	104	85	17	867	ST-828 complex	184	1678444	7	100	7	100
24266	86	189	86		287	236	76			167	1752685	6	85.7	7	100
24269	130	177	88	198	246	209	76	1572		191	1660889	7	100	7	100
24270	145	207	172	239	275	243	154	1992		125	1624910	7	100	7	100
24272	128	175	152	197	245	208	133	1576		197	1521545	7	100	7	100
57756	33	39	30	82	104	43	17	828	ST-828 complex	374	1566888	7	100	7	100
57757	33	38	30	115	104	85	17	867	ST-828 complex	79	1633576	7	100	7	100
57758	163	215	210	218	669	241	198	7243		65	1542097	7	100	7	100
57760	33	39	30	82	104	43	17	828	ST-828 complex	532	1570976	7	100	7	100
60467	130	86	87	124	160	129	73	2016		312	1606337	7	100	7	100
60471	130	245	88	245	288	129	76	2326		282	1554713	7	100	7	100
60484	33	38	30	82	104	85	68	887	ST-828 complex	216	1594196	7	100	7	100
60485	7	110	103	140	188	164	79	3667	ST-1150 complex	206	1618028	7	100	7	100
60486	157	39	30	79	668	35	17	8320		276	1678945	7	100	7	100
60488		110	103	140	188	164	79			691	1505418	6	85.7	7	100
60535	81	86	87	113	270	238	152	3311		446	1431051	7	100	7	100
60618		110	30	291	188	164	79			261	1657253	6	85.7	6	85.7
60628	32	39	44	82	104	85	36	2696		255	1589408	7	100	7	100
60641	78	167	158	204	254	212	140	1670		281	1547646	7	100	7	100
60647	123	182	160	206	233	217	138	1643		217	1500025	7	100	7	100
105577	247	748	30	82	113	47	17	10234		142	1893698	7	100	7	100
105578	441	39	30	82	113	47	17	10294	ST-828 complex	67	1862361	7	100	7	100
105579	33	110	30	82	113	631	17	10295	ST-828 complex	113	1862322	7	100	7	100
105580	33	110	30	82	113	631	17	10295	ST-828 complex	116	1861021	7	100	7	100
105581	33	110	30	82	113	631	17	10295	ST-828 complex	135	1854309	7	100	7	100
105583	103	110	103	833	1056	815	74	10299		286	1944631	7	100	7	100
105584	33	39	30	82	113	631	17	8408	ST-828 complex	151	1831581	7	100	7	100
105585	103	110	103	833	1056	815	74	10299		80	1770439	7	100	7	100
105586	33	39	30	82	113	631	17	8408	ST-828 complex	123	1837873	7	100	7	100
105587	103	110	103	833	113	3	79	10301	ST-1150 complex	76	1814641	7	100	7	100
105590	33	110	30	82	113	631	17	10295	ST-828 complex	81	1867734	7	100	7	100
105593	33	110	30	82	113	631	17	10295	ST-828 complex	105	1859565	7	100	7	100
105594	33	110	30	82	113	631	17	10295	ST-828 complex	120	1854493	7	100	7	100
105597	33	110	30	82	113	631	17	10295	ST-828 complex	92	1862769	7	100	7	100
105601	33	110	30	82	113	631	17	10295	ST-828 complex	74	1868753	7	100	7	100
105614	33	39	30	82	113	47	17	825	ST-828 complex	87	1826732	7	100	7	100
105616	247	748	30	82	113	47	17	10234		163	1881045	7	100	7	100
105636	33	39	30	82	113	56	17	1173	ST-828 complex	58	1940640	7	100	7	100
105640	33	39	30	82	104	47	17	1055	ST-828 complex	73	1795495	7	100	7	100
105642	33	39	30	82	104	47	17	1055	ST-828 complex	199	1853184	7	100	7	100
105746	33	38	30	79	104	43	36	1826	ST-828 complex	70	1761153	7	100	7	100
105747	33	38	30	79	104	43	36	1826	ST-828 complex	81	1764892	7	100	7	100
108479	33	39	30	82	113	56	17	1173	ST-828 complex	127	1674662	7	100	7	100
108481	33	39	30	82	113	56	17	1173	ST-828 complex	113	1736120	7	100	7	100
108483	33	39	30	82	113	56	17	1173	ST-828 complex	138	1725846	7	100	7	100
108486	33	39	30	82	113	56	17	1173	ST-828 complex	213	1604940	7	100	7	100
108491	33	39	30	82	113	56	17	1173	ST-828 complex	217	1544182	7	100	7	100
108492	33	39	30	82	113	56	17	1173	ST-828 complex	191	1540490	7	100	7	100
108494	33	39	30	82	104	47	17	1055	ST-828 complex	379	1577234	7	100	7	100
108498	33	39	30	82	113	47	17	825	ST-828 complex	124	1702837	7	100	7	100
108504	33	39	30	82	113	43	17	829	ST-828 complex	204	1542467	7	100	7	100
108508	33	39	30	82	113	56	17	1173	ST-828 complex	166	1692692	7	100	7	100
108524	33	39	30	82	113	43	17	829	ST-828 complex	254	1567228	7	100	7	100
108528	103	110	103	833	1048	1	120	12696		336	1586915	7	100	7	100
108546	33	39	30	79	189	47	17	2256	ST-828 complex	384	1624750	7	100	7	100
112371	33	39	30	82	113	897	17	11957	ST-828 complex	41	1698052	7	100	7	100
112373	33	39	30	82	113	897	17	11957	ST-828 complex	38	1694492	7	100	7	100
112375	33	39	30	82	113	897	17	11957	ST-828 complex	36	1693822	7	100	7	100
112382	103	110	103	140	764	898	120	11959	ST-1150 complex	78	1789453	7	100	7	100
112386	247	748	30	82	113	164	17	11960		50	1825446	7	100	7	100
112388	103	110	103	140	210	899	79	11961	ST-1150 complex	26	1765266	7	100	7	100
112390	103	110	103	833	113	164	120	11963		21	1769029	7	100	7	100
112397	33	39	30	82	113	43	17	829	ST-828 complex	65	1749155	7	100	7	100
112398	33	748	30	82	113	47	17	11965	ST-828 complex	86	1859143	7	100	7	100
112421	33	39	30	82	113	631	17	8408	ST-828 complex	87	1897625	7	100	7	100
112422	103	110	103	140	210	899	79	11961	ST-1150 complex	30	1764749	7	100	7	100
112424	103	110	103	833	210	164	17	11967		107	1891155	7	100	7	100
112425	103	110	103	140	1048	900	79	11968	ST-1150 complex	26	1727518	7	100	7	100
112427	33	39	30	82	113	43	17	829	ST-828 complex	26	1723420	7	100	7	100
112431	33	38	30	79	104	64	17	3858	ST-828 complex	32	1804783	7	100	7	100
112432	247	748	30	82	189	47	17	10266		50	1797160	7	100	7	100
112434	33	39	30	82	211	85	17	1082	ST-828 complex	279	1945634	7	100	7	100
112436	103	110	103	833	113	164	120	11963		37	1768446	7	100	7	100
112437	103	110	103	833	113	164	120	11963		28	1770031	7	100	7	100
112451	247	748	30	82	189	47	17	10266		132	1807449	7	100	0	0
112453	33	39	30	158	113	47	17	10250	ST-828 complex	44	1661788	7	100	0	0
112454	247	748	30	82	113	47	17	10234		80	1805615	7	100	0	0
112455	33	39	30	82	113	43	17	829	ST-828 complex	20	1638497	7	100	1	14.3
113204	33	39	30	82	104	47	17	1055	ST-828 complex	47	1801181	7	100	7	100
113205	33	39	30	82	104	47	17	1055	ST-828 complex	47	1799488	7	100	7	100
113212	33	39	30	82	104	47	17	1055	ST-828 complex	70	1805321	7	100	7	100
113214	247	748	30	82	189	47	17	10266		89	1810130	7	100	7	100
113217	103	110	103	140	210	899	79	11961	ST-1150 complex	22	1767517	7	100	7	100
113218	33	39	30	82	113	1016	17	12285	ST-828 complex	100	1890802	7	100	7	100
113220	33	39	30	82	104	47	17	1055	ST-828 complex	64	1808698	7	100	7	100
113221	33	39	30	82	113	1016	17	12285	ST-828 complex	59	1892673	7	100	7	100
113222	33	39	30	82	104	47	17	1055	ST-828 complex	78	1859924	7	100	7	100
113223	103	110	103	140	210	899	79	11961	ST-1150 complex	30	1766115	7	100	7	100
114263	33	39	30	82	113	47	17	825	ST-828 complex	71	1843169	7	100	7	100
114264	33	39	30	82	113	47	17	825	ST-828 complex	78	1838533	7	100	7	100
114267	33	39	30	82	113	47	17	825	ST-828 complex	196	1811970	7	100	7	100
114268	103	110	103	140	210	899	79	11961	ST-1150 complex	128	1750544	7	100	7	100
114270	103	110	103	140	113	56	74	12297	ST-1150 complex	40	1775996	7	100	7	100
114272	53	110	103	833	210	1019	74	12298		33	1775272	7	100	7	100
114273	53	110	103	833	210	1019	74	12298		60	1778667	7	100	7	100
114275	103	39	30	82	113	47	17	10617	ST-828 complex	51	1751603	7	100	7	100
114277	53	110	103	833	210	1019	74	12298		25	1772913	7	100	7	100
114279	33	39	30	82	113	631	17	8408	ST-828 complex	67	1889968	7	100	7	100
114280	103	39	30	82	113	47	17	10617	ST-828 complex	23	1729153	7	100	7	100
114281	103	39	30	82	113	47	17	10617	ST-828 complex	139	1717933	7	100	7	100
114282	103	39	30	82	113	47	17	10617	ST-828 complex	30	1729304	7	100	7	100
114292	33	39	30	82	113	47	17	825	ST-828 complex	131	1815205	7	100	7	100
114293	33	39	30	82	113	1016	17	12285	ST-828 complex	74	1832469	7	100	7	100
115883	33	39	30	82	104	47	17	1055	ST-828 complex	45	1800160	7	100	7	100
115928	33	39	30	82	113	43	17	829	ST-828 complex	47	1632927	7	100	7	100
115929	103	110	30	833	113	164	79	10236		68	1696588	7	100	7	100
115930	33	39	30	82	113	43	17	829	ST-828 complex	153	1645866	7	100	7	100
115931	33	39	30	82	113	47	17	825	ST-828 complex	291	1780978	7	100	7	100
115932	247	748	30	82	113	47	17	10234		89	1825987	7	100	7	100
115933	33	39	30	158	113	47	17	10250	ST-828 complex	136	1744955	7	100	7	100
115934	33	39	30	82	1359	164	17	12394	ST-828 complex	102	1853695	7	100	7	100
115935	247	748	30	82	189	47	17	10266		80	1804560	7	100	7	100
115936	33	39	30	79	104	43	17	902	ST-828 complex	52	1677251	7	100	7	100
115937	33	39	30	82	113	47	17	825	ST-828 complex	98	1889006	7	100	7	100
115938	33	39	30	82	113	47	17	825	ST-828 complex	116	1880049	7	100	7	100
115939	33	39	30	82	113	164	17	1497	ST-828 complex	111	1842792	7	100	7	100
115940	33	110	30	158	113	47	17	10248		245	1659029	7	100	7	100
115941	247	748	30	82	113	47	17	10234		103	1816107	7	100	7	100
115942	33	39	30	82	113	47	17	825	ST-828 complex	89	1835467	7	100	7	100
115943	33	39	30	82	113	47	17	825	ST-828 complex	124	1870446	7	100	7	100
115944	103	110	30	833	1048	1	79	10259		288	1829440	7	100	7	100
115945	33	39	30	82	113	164	17	1497	ST-828 complex	97	1819553	7	100	7	100
115946	247	748	30	82	189	47	17	10266		74	1778845	7	100	7	100
115947	103	110	30	833	1048	164	120	10252		90	1724722	7	100	7	100
115948	33	39	30	82	113	47	17	825	ST-828 complex	121	1877065	7	100	7	100
115949	33	39	66	82	104	44	41	831	ST-828 complex	179	1665589	7	100	7	100
115950	33	39	30	82	113	43	17	829	ST-828 complex	51	1648867	7	100	7	100
115951	33	39	103	82	113	47	17	6275	ST-828 complex	51	1852347	7	100	7	100
115952	33	39	30	79	104	47	17	830	ST-828 complex	227	1745044	7	100	7	100
115953	33	39	30	82	113	47	17	825	ST-828 complex	96	1689466	7	100	7	100
115954	103	110	30	833	113	1	79	10257		177	1707878	7	100	7	100
115955	33	39	30	82	113	47	17	825	ST-828 complex	63	1685734	7	100	7	100
115956	33	39	30	82	113	47	17	825	ST-828 complex	282	1787823	7	100	7	100
115957	247	748	30	82	113	47	17	10234		92	1817000	7	100	7	100
115958	33	39	30	82	113	164	17	1497	ST-828 complex	97	1835731	7	100	7	100
115959	33	39	30	82	113	43	17	829	ST-828 complex	276	1701238	7	100	7	100
115960	33	39	30	82	113	56	17	1173	ST-828 complex	50	1780178	7	100	7	100
115961	247	748	30	82	113	47	17	10234		71	1815137	7	100	7	100
115962	33	39	30	82	113	164	17	1497	ST-828 complex	92	1833262	7	100	7	100
115963	103	110	103	140	764	164	79	10240	ST-1150 complex	101	1732009	7	100	7	100
115964	33	39	30	82	113	164	17	1497	ST-828 complex	103	1838251	7	100	7	100
115965	103	110	30	833	11	1	79	10238		242	1679463	7	100	7	100
115966	247	748	30	82	113	47	17	10234		121	1801440	7	100	7	100
115967	33	39	30	82	113	47	17	825	ST-828 complex	107	1835265	7	100	7	100
115968	33	110	30	82	113	47	17	8737	ST-828 complex	100	1830975	7	100	7	100
115969	33	39	30	78	113	56	17	10260	ST-828 complex	144	1770098	7	100	7	100
115970	33	39	30	78	113	56	17	10260	ST-828 complex	248	1752413	7	100	7	100
115971	33	39	30	82	113	43	17	829	ST-828 complex	58	1673874	7	100	7	100
115972	247	748	30	82	113	47	17	10234		133	1883409	7	100	7	100
115973	33	39	30	82	113	47	17	825	ST-828 complex	84	1808377	7	100	7	100
115974	247	748	30	82	113	47	17	10234		85	1811032	7	100	7	100
115975	33	939	30	82	113	47	17	12395	ST-828 complex	56	1647363	7	100	7	100
115976	103	110	103	833	11	1	79	10274	ST-1150 complex	43	1715407	7	100	7	100
115977	33	39	30	82	113	43	17	829	ST-828 complex	43	1727459	7	100	7	100
115982	33	39	30	82	104	47	17	1055	ST-828 complex	47	1800677	7	100	7	100
115990	33	110	30	82	1360	631	17	12397	ST-828 complex	47	1890148	7	100	7	100
115999	247	748	30	82	113	47	17	10234		61	1867659	7	100	7	100
116009	247	748	30	82	113	47	17	10234		52	1819870	7	100	7	100
116313	33	39	30	82	113	47	17	825	ST-828 complex	160	1867225	7	100	7	100
118045	33	38	226	82	104	35	17	13415	ST-828 complex	20	1785121	7	100	7	100
118046	33	38	30	79	763	35	17	13411		25	1736471	7	100	7	100
118049	33	38	226	82	104	35	17	13415	ST-828 complex	64	1807356	7	100	7	100
118051	103	110	103	833	113	67	120	13417		28	1734104	7	100	7	100
118693	33	748	103	82	113	47	17	13466		68	1813905	7	100	7	100
118694	33	1019	30	82	104	43	17	13467	ST-828 complex	24	1793292	7	100	7	100
143446	103	110	103	833	113	67	120	13417		29	1733918	7	100	7	100
143447	103	110	103	833	113	67	120	13417		23	1734532	7	100	7	100
143448	103	110	103	833	113	67	120	13417		37	1731387	7	100	7	100
143452	33	39	30	82	1360	47	17	13536	ST-828 complex	63	1855119	7	100	7	100
143453	103	110	103	833	113	1125	79	13537	ST-1150 complex	16	1732797	7	100	7	100
143464	33	39	30	82	104	47	17	1055	ST-828 complex	55	1798009	7	100	7	100
143475	33	38	226	82	104	35	17	13415	ST-828 complex	190	1930591	7	100	7	100
143476	33	38	226	82	104	35	17	13415	ST-828 complex	25	1773355	7	100	7	100
143477	33	38	226	82	104	35	17	13415	ST-828 complex	26	1773098	7	100	7	100
143478	33	38	226	82	104	35	17	13415	ST-828 complex	21	1776967	7	100	7	100
143479	103	110	103	140	1492	1125	79	13542	ST-1150 complex	26	1762819	7	100	7	100
143480	103	110	103	140	1492	1125	79	13542	ST-1150 complex	39	1761518	7	100	7	100
143481	103	110	103	140	1492	1125	79	13542	ST-1150 complex	44	1760556	7	100	7	100
143482	33	395	30	79	1479	47	79	13543		54	1688842	7	100	7	100
143483	33	395	30	79	1479	47	79	13543		24	1692512	7	100	7	100
143484	33	395	30	79	1479	47	79	13543		18	1689522	7	100	7	100
143485	103	110	103	833	113	1125	79	13537	ST-1150 complex	28	1737899	7	100	7	100
143486	103	110	103	833	113	1125	79	13537	ST-1150 complex	15	1733038	7	100	7	100
143821	103	110	103	140	764	898	120	11959	ST-1150 complex	21	1770482	7	100	7	100
143822	103	110	103	140	764	898	120	11959	ST-1150 complex	220	1741037	7	100	7	100
143823	103	110	103	140	764	898	120	11959	ST-1150 complex	23	1770584	7	100	7	100
143824	103	110	103	140	210	899	79	11961	ST-1150 complex	37	1762922	7	100	7	100
143825	103	110	103	140	210	899	79	11961	ST-1150 complex	27	1764810	7	100	7	100
143826	103	110	103	140	210	899	79	11961	ST-1150 complex	51	1764201	7	100	7	100
143827	33	39	30	82	104	47	17	1055	ST-828 complex	65	1801380	7	100	7	100
143828	33	39	30	82	104	47	17	1055	ST-828 complex	48	1800786	7	100	7	100
143829	33	39	30	82	104	47	17	1055	ST-828 complex	45	1799029	7	100	7	100
143830	33	39	30	82	104	47	17	1055	ST-828 complex	46	1799032	7	100	7	100
143831	33	39	30	82	104	47	17	1055	ST-828 complex	49	1799684	7	100	7	100
143832	33	39	30	82	104	47	17	1055	ST-828 complex	50	1799724	7	100	7	100
143833	33	39	30	82	104	47	17	1055	ST-828 complex	47	1800060	7	100	7	100
143834	33	39	30	82	104	47	17	1055	ST-828 complex	59	1809375	7	100	7	100
143835	247	748	30	82	189	47	17	10266		93	1841507	7	100	7	100
143836	247	748	30	82	189	47	17	10266		56	1832254	7	100	7	100
143837	247	748	30	82	189	47	17	10266		64	1828434	7	100	7	100
143838	103	110	103	140	210	899	79	11961	ST-1150 complex	35	1770965	7	100	7	100
143839	103	110	103	140	210	899	79	11961	ST-1150 complex	32	1767972	7	100	7	100
143840	103	110	103	140	210	899	79	11961	ST-1150 complex	192	1751239	7	100	7	100
143841	33	39	30	82	104	47	17	1055	ST-828 complex	71	1809342	7	100	7	100
143842	33	39	30	82	104	47	17	1055	ST-828 complex	68	1808623	7	100	7	100
143843	33	39	30	82	113	1016	17	12285	ST-828 complex	83	1901827	7	100	7	100
143844	33	39	30	82	113	1016	17	12285	ST-828 complex	82	1880380	7	100	7	100
143845	33	39	30	82	104	47	17	1055	ST-828 complex	113	1868985	7	100	7	100
143846	103	110	103	140	210	899	79	11961	ST-1150 complex	43	1770542	7	100	7	100
143847	103	110	103	140	210	899	79	11961	ST-1150 complex	26	1770514	7	100	7	100
143848	33	110	30	82	1360	631	17	12397	ST-828 complex	59	1888311	7	100	7	100
143849	33	110	30	82	1360	631	17	12397	ST-828 complex	89	1889461	7	100	7	100
143850	33	110	30	82	1360	631	17	12397	ST-828 complex	209	1876206	7	100	7	100
143851	33	110	30	82	1360	631	17	12397	ST-828 complex	43	1889662	7	100	7	100
143852	247	748	30	82	113	47	17	10234		58	1864575	7	100	7	100
143853	247	748	30	82	113	47	17	10234		101	1864951	7	100	7	100
143854	247	748	30	82	113	47	17	10234		88	1863505	7	100	7	100
143855	33	39	30	79	1479	47	79	13857		341	1743922	7	100	7	100
143856	33	39	30	82	211	85	17	1082	ST-828 complex	48	1704251	7	100	7	100
143858	103	110	5	140	210	899	79	13867	ST-1150 complex	49	1773462	7	100	7	100
143859	103	110	5	140	210	899	79	13867	ST-1150 complex	45	1772199	7	100	7	100
143860	103	110	5	140	210	899	79	13867	ST-1150 complex	93	1773895	7	100	7	100
143862	103	110	103	833	210	3	79	13855	ST-1150 complex	93	1834387	7	100	7	100
143863	247	748	30	82	189	47	17	10266		43	1790403	7	100	7	100
143864	247	748	30	82	189	47	17	10266		51	1789408	7	100	7	100
143865	247	748	30	82	189	47	17	10266		57	1791232	7	100	7	100
143866	247	748	30	82	189	47	17	10266		48	1787619	7	100	7	100
143867	247	748	30	82	113	47	17	10234		295	1810840	7	100	7	100
143868	247	748	30	82	113	47	17	10234		65	1869362	7	100	7	100
143869	103	110	103	833	210	3	79	13855	ST-1150 complex	44	1770009	7	100	7	100
143870	103	110	103	833	210	3	79	13855	ST-1150 complex	17	1771880	7	100	7	100
143871	103	110	103	833	210	3	79	13855	ST-1150 complex	17	1771865	7	100	7	100
143872	103	110	103	833	210	3	79	13855	ST-1150 complex	19	1771467	7	100	7	100
143873	103	110	103	833	210	3	79	13855	ST-1150 complex	35	1772043	7	100	7	100
143874	103	110	103	833	210	3	79	13855	ST-1150 complex	13	1772575	7	100	7	100
143875	103	110	103	833	210	3	79	13855	ST-1150 complex	47	1770092	7	100	7	100
143876	103	110	103	833	210	3	79	13855	ST-1150 complex	10	1772932	7	100	7	100
143877	33	39	30	82	211	85	17	1082	ST-828 complex	34	1688015	7	100	7	100
143878	33	39	30	82	211	85	17	1082	ST-828 complex	62	1686959	7	100	7	100
143879	33	39	30	82	211	85	17	1082	ST-828 complex	53	1687659	7	100	7	100
143880	33	39	30	82	211	85	17	1082	ST-828 complex	31	1688210	7	100	7	100
143881	33	39	30	82	211	85	17	1082	ST-828 complex	102	1688682	7	100	7	100
143882	33	39	30	82	211	85	17	1082	ST-828 complex	286	1677492	7	100	7	100
143883	33	39	30	82	211	85	17	1082	ST-828 complex	90	1687584	7	100	7	100
143884	33	110	30	82	113	631	17	10295	ST-828 complex	111	1873173	7	100	7	100
143885	33	110	30	82	113	631	17	10295	ST-828 complex	194	1868566	7	100	7	100
143886	247	748	30	82	113	164	17	11960		65	1832024	7	100	7	100
143887	33	110	30	82	113	631	17	10295	ST-828 complex	48	1876829	7	100	7	100
143888	33	39	30	82	104	47	17	1055	ST-828 complex	116	1860122	7	100	7	100
143889	33	39	30	82	104	47	17	1055	ST-828 complex	119	1861375	7	100	7	100
143890	33	39	30	82	104	47	17	1055	ST-828 complex	107	1858611	7	100	7	100
143891	33	110	30	82	113	631	17	10295	ST-828 complex	83	1962486	7	100	7	100
143892	33	110	30	82	113	631	17	10295	ST-828 complex	139	1963797	7	100	7	100
143893	33	110	30	82	113	631	17	10295	ST-828 complex	142	1969350	7	100	7	100
143894	33	38	30	79	104	64	17	3858	ST-828 complex	310	1781976	7	100	7	100
143895	53	110	103	833	764	899	74	13856		61	1779274	7	100	7	100
143896	53	110	103	833	764	899	74	13856		54	1776340	7	100	7	100
143897	53	110	103	833	764	899	74	13856		87	1782684	7	100	7	100
143898	33	39	30	82	104	47	17	1055	ST-828 complex	116	1861726	7	100	7	100
143899	33	39	30	82	104	47	17	1055	ST-828 complex	105	1859067	7	100	7	100
143900	33	39	30	82	104	47	17	1055	ST-828 complex	116	1862170	7	100	7	100
143901	247	748	30	82	113	47	17	10234		56	1861037	7	100	7	100
143902	247	748	30	82	113	47	17	10234		67	1859050	7	100	7	100
143903	247	748	30	82	113	47	17	10234		94	1861340	7	100	7	100
143904	33	39	30	82	104	47	17	1055	ST-828 complex	158	1821273	7	100	7	100
143905	33	39	30	82	104	47	17	1055	ST-828 complex	77	1805918	7	100	7	100
143906	33	39	30	82	104	47	17	1055	ST-828 complex	171	1809526	7	100	7	100
143907	33	39	30	82	104	47	17	1055	ST-828 complex	281	1813925	7	100	7	100
143908	33	39	30	82	113	43	17	829	ST-828 complex	64	1710227	7	100	7	100
143909	33	39	30	82	113	43	17	829	ST-828 complex	55	1717134	7	100	7	100
143910	33	39	30	82	113	43	17	829	ST-828 complex	35	1713116	7	100	7	100
143911	33	39	30	82	113	43	17	829	ST-828 complex	28	1705549	7	100	7	100
143912	33	39	30	82	104	47	17	1055	ST-828 complex	50	1778492	7	100	7	100
143913	33	39	30	82	104	47	17	1055	ST-828 complex	58	1784587	7	100	7	100
143914	33	39	30	82	104	47	17	1055	ST-828 complex	74	1783370	7	100	7	100
143915	33	39	30	82	104	47	17	1055	ST-828 complex	58	1784312	7	100	7	100
143916	33	38	30	79	104	64	17	3858	ST-828 complex	31	1805591	7	100	7	100
143917	247	748	30	82	189	47	17	10266		55	1795642	7	100	7	100
143918	33	39	30	82	211	85	17	1082	ST-828 complex	85	1765590	7	100	7	100
143919	103	110	103	833	113	164	120	11963		49	1764189	7	100	7	100
143920	103	110	103	833	113	164	120	11963		39	1766397	7	100	7	100
143921	103	110	103	833	113	164	120	11963		84	1762069	7	100	7	100
143922	103	110	103	833	113	164	120	11963		61	1766880	7	100	7	100
143923	103	110	103	833	113	164	120	11963		124	1746465	7	100	7	100
143924	103	110	103	833	113	164	120	11963		31	1764608	7	100	7	100
143925	33	39	30	82	104	47	17	1055	ST-828 complex	53	1799814	7	100	7	100
143926	33	39	30	82	104	47	17	1055	ST-828 complex	53	1800150	7	100	7	100
143927	33	39	30	82	104	47	17	1055	ST-828 complex	128	1793804	7	100	7	100
143928	247	748	30	82	189	47	17	10266		65	1738972	7	100	7	100
143929	247	748	30	82	189	47	17	10266		66	1738056	7	100	7	100
143930	103	110	30	140	210	177	79	13864	ST-1150 complex	42	1663145	7	100	7	100
143931	33	748	103	82	113	47	17	13466		55	1809714	7	100	7	100
143932	33	748	103	82	113	47	17	13466		70	1806518	7	100	7	100
143933	33	1019	30	82	104	43	17	13467	ST-828 complex	33	1792332	7	100	7	100
143934	33	1019	30	82	104	43	17	13467	ST-828 complex	23	1793317	7	100	7	100
143935	103	110	103	140	210	899	79	11961	ST-1150 complex	165	1760207	7	100	7	100
143936	103	110	103	140	210	899	79	11961	ST-1150 complex	88	1768287	7	100	7	100
143937	103	110	103	140	210	899	79	11961	ST-1150 complex	53	1768840	7	100	7	100
144444	247	748	30	82	189	47	17	10266		40	1792970	7	100	7	100
144446	33	39	30	82	104	47	17	1055	ST-828 complex	70	1850693	7	100	7	100
144447	33	39	30	82	104	47	17	1055	ST-828 complex	77	1848896	7	100	7	100
144449	247	748	30	82	189	47	17	10266		39	1785369	7	100	7	100
144450	33	39	30	158	113	47	17	10250	ST-828 complex	11	1658903	7	100	7	100
144451	103	110	30	833	1048	1	79	10259		22	1714601	7	100	7	100
144452	33	39	30	82	113	47	17	825	ST-828 complex	44	1686775	7	100	7	100
144453	33	39	30	82	113	43	17	829	ST-828 complex	175	1670946	7	100	7	100
144454	247	748	30	82	189	47	17	10266		42	1780389	7	100	7	100
144455	247	748	30	82	113	47	17	10234		49	1820317	7	100	7	100
144456	247	748	30	82	189	47	17	10266		46	1781930	7	100	7	100
144457	33	39	30	78	113	56	17	10260	ST-828 complex	94	1703070	7	100	7	100
144458	247	748	30	82	113	47	17	10234		51	1820333	7	100	7	100
144460	33	39	30	82	113	164	17	1497	ST-828 complex	58	1839893	7	100	7	100
144461	247	748	30	82	113	47	17	10234		665	1949551	7	100	7	100
144462	33	39	30	82	113	47	17	825	ST-828 complex	60	1889241	7	100	7	100
144463	33	39	30	82	113	164	17	1497	ST-828 complex	72	1843547	7	100	7	100
144464	33	39	30	82	113	56	17	1173	ST-828 complex	45	1848178	7	100	7	100
144465	103	110	103	833	113	815	74	13893		18	1732282	7	100	7	100
148688	33	38	30	79	952	35	17	14163		31	1754354	7	100	7	100
148689	53	38	44	82	104	44	36	14164		31	1777643	7	100	7	100
148690	32	39	30	82	104	173	36	14166	ST-828 complex	36	1793586	7	100	7	100
148691	33	38	30	79	104	35	944	14167		38	1876927	7	100	7	100
148692	33	39	30	82	113	43	17	829	ST-828 complex	15	1670134	7	100	7	100
148693	103	110	103	140	1492	1125	79	13542	ST-1150 complex	36	1763009	7	100	7	100
148701	33	39	30	79	1479	47	79	13857		86	1688269	7	100	7	100
148702	33	39	30	79	1479	47	79	13857		64	1689641	7	100	7	100
148708	103	110	103	833	113	164	120	11963		65	1741945	7	100	7	100
148709	103	110	103	833	113	164	120	11963		40	1734182	7	100	7	100
148724	33	39	30	82	113	43	17	829	ST-828 complex	30	1679800	7	100	7	100
148730	247	748	30	82	189	47	17	10266		50	1823309	7	100	7	100
148731	33	39	30	82	104	47	17	1055	ST-828 complex	81	1821267	7	100	7	100
148735	33	39	30	82	113	43	17	829	ST-828 complex	31	1676945	7	100	7	100
148737	247	748	30	82	189	47	17	10266		53	1795403	7	100	7	100
148741	53	110	103	833	210	1019	74	12298		37	1776397	7	100	7	100
148746	53	110	103	833	210	1019	74	12298		33	1775996	7	100	7	100
148749	441	39	30	82	113	47	17	10294	ST-828 complex	84	1810374	7	100	7	100
148757	441	39	30	82	113	47	17	10294	ST-828 complex	77	1809607	7	100	7	100
148761	247	748	30	82	189	47	17	10266		59	1796642	7	100	7	100
148771	441	39	30	82	113	47	17	10294	ST-828 complex	79	1799590	7	100	7	100
148772	103	110	103	140	210	899	79	11961	ST-1150 complex	56	1781519	7	100	7	100
148773	33	39	30	82	113	47	17	825	ST-828 complex	63	1848400	7	100	7	100
148777	53	110	103	833	210	1019	74	12298		27	1764031	7	100	7	100
148780	53	110	103	833	210	1019	74	12298		31	1764842	7	100	7	100
148794	33	39	30	82	113	897	17	11957	ST-828 complex	35	1695560	7	100	7	100
148796	33	39	30	82	113	897	17	11957	ST-828 complex	36	1694106	7	100	7	100
149094	103	110	103	833	113	164	120	11963		30	1718293	7	100	7	100
149097	33	39	30	82	113	47	17	825	ST-828 complex	65	1840778	7	100	7	100
149101	33	39	30	82	113	897	17	11957	ST-828 complex	36	1735759	7	100	7	100
149102	247	748	30	82	113	47	17	10234		79	1827704	7	100	7	100
149105	247	748	30	82	113	47	17	10234		67	1815368	7	100	7	100
149106	247	748	30	82	113	47	17	10234		67	1815882	7	100	7	100
149203	33	748	103	82	113	47	17	13466		70	1791656	7	100	7	100
149204	103	110	103	140	113	56	74	12297	ST-1150 complex	43	1770576	7	100	7	100
149206	103	110	103	140	113	56	74	12297	ST-1150 complex	40	1771689	7	100	7	100
149210	33	39	30	82	104	47	17	1055	ST-828 complex	53	1804720	7	100	7	100
149214	103	110	103	833	113	67	120	13417		40	1778689	7	100	7	100
149218	247	1038	30	82	113	47	17	14191		61	1816687	7	100	7	100
149222	33	39	30	82	113	897	17	11957	ST-828 complex	34	1697209	7	100	7	100
149224	33	39	30	82	113	1016	17	12285	ST-828 complex	94	1839209	7	100	7	100
149229	33	748	30	82	113	47	17	11965	ST-828 complex	58	1823773	7	100	7	100
149265	247	748	30	82	189	47	17	10266		70	1793770	7	100	7	100
149266	33	39	30	82	113	43	17	829	ST-828 complex	30	1670604	7	100	7	100
149268	33	39	30	82	113	897	17	11957	ST-828 complex	49	1699179	7	100	7	100
149270	33	39	30	82	113	631	17	8408	ST-828 complex	116	1864110	7	100	7	100
149272	33	39	30	82	113	43	17	829	ST-828 complex	30	1678427	7	100	7	100
149273	33	39	30	82	113	43	17	829	ST-828 complex	57	1743863	7	100	7	100
149274	33	39	30	82	113	897	17	11957	ST-828 complex	39	1740538	7	100	7	100
149277	33	39	30	82	113	43	17	829	ST-828 complex	30	1639285	7	100	7	100
149279	33	39	30	82	113	43	17	829	ST-828 complex	27	1639238	7	100	7	100
149285	33	39	30	82	113	47	17	825	ST-828 complex	72	1851110	7	100	7	100
149289	247	748	30	82	113	47	17	10234		66	1815769	7	100	7	100
149295	33	748	30	82	113	47	17	11965	ST-828 complex	58	1818091	7	100	7	100
149298	33	39	30	82	113	43	17	829	ST-828 complex	101	1659523	7	100	7	100
149304	33	39	30	82	113	43	17	829	ST-828 complex	16	1670316	7	100	7	100
149305	33	39	30	82	113	43	17	829	ST-828 complex	15	1670537	7	100	7	100
149306	33	39	30	82	113	43	17	829	ST-828 complex	16	1670503	7	100	7	100
149312	247	748	30	82	113	47	17	10234		65	1836067	7	100	7	100
149327	33	39	30	833	113	47	17	14202	ST-828 complex	64	1845725	7	100	7	100
149328	33	39	30	833	113	47	17	14202	ST-828 complex	64	1844855	7	100	7	100
149334	33	38	30	82	104	44	36	1107	ST-828 complex	17	1696460	7	100	7	100
149335	32	39	30	82	104	173	36	14166	ST-828 complex	34	1792425	7	100	7	100
149336	32	39	30	82	104	173	36	14166	ST-828 complex	29	1815011	7	100	7	100
149337	33	38	30	82	104	43	17	854	ST-828 complex	28	1718188	7	100	7	100
149338	32	39	30	82	104	173	36	14166	ST-828 complex	28	1777207	7	100	7	100
149339	32	39	30	82	104	173	36	14166	ST-828 complex	38	1794145	7	100	7	100
149350	103	110	103	140	210	1143	79	14204	ST-1150 complex	50	1777391	7	100	7	100
149354	33	1019	30	79	104	35	17	14205	ST-828 complex	26	1729576	7	100	7	100
149355	33	38	30	82	104	35	68	2508	ST-828 complex	50	1841081	7	100	7	100
149356	33	38	30	79	763	35	17	13411		27	1771121	7	100	7	100
149357	33	38	30	82	104	173	68	1134	ST-828 complex	25	1710864	7	100	7	100
149358	33	1019	30	79	104	35	17	14205	ST-828 complex	28	1736993	7	100	7	100
149359	33	38	30	82	104	173	68	1134	ST-828 complex	105	1887178	7	100	7	100
149360	33	1019	30	79	104	35	17	14205	ST-828 complex	27	1820592	7	100	7	100
149364	33	39	30	82	104	35	36	2715	ST-828 complex	32	1771643	7	100	7	100
149365	32	39	30	82	104	173	36	14166	ST-828 complex	27	1794024	7	100	7	100
149366	33	38	30	79	763	35	17	13411		26	1769792	7	100	7	100
149368	441	39	30	82	113	47	17	10294	ST-828 complex	82	1812357	7	100	7	100
149371	33	39	30	82	113	631	17	8408	ST-828 complex	74	1868566	7	100	7	100
149375	33	38	30	82	104	43	17	854	ST-828 complex	30	1717555	7	100	7	100
149376	33	1019	30	79	952	35	17	14206		31	1741720	7	100	7	100
149377	33	38	30	79	104	35	17	2642	ST-828 complex	37	1829448	7	100	7	100
149378	32	39	30	82	104	173	36	14166	ST-828 complex	27	1776666	7	100	7	100
149379	32	39	30	82	104	173	36	14166	ST-828 complex	24	1786304	7	100	7	100
149380	32	39	30	82	104	173	36	14166	ST-828 complex	26	1777144	7	100	7	100
149381	33	39	30	79	104	117	17	8165	ST-828 complex	20	1720606	7	100	7	100
149384	33	39	30	82	113	897	17	11957	ST-828 complex	29	1697444	7	100	7	100
149388	32	38	30	82	104	35	36	2685		32	1773413	7	100	7	100
149391	33	39	30	82	113	897	17	11957	ST-828 complex	34	1697460	7	100	7	100
149400	33	39	30	82	104	35	36	2715	ST-828 complex	31	1771571	7	100	7	100
149401	32	39	30	82	104	173	36	14166	ST-828 complex	27	1794308	7	100	7	100
149402	53	39	44	82	104	35	36	1450		33	1744912	7	100	7	100
149403	33	1019	30	79	104	35	17	14205	ST-828 complex	26	1739101	7	100	7	100
149412	33	39	30	82	113	897	17	11957	ST-828 complex	37	1699479	7	100	7	100
149416	247	748	30	82	113	47	17	10234		77	1917996	7	100	7	100
149417	247	748	30	82	189	47	17	10266		56	1796801	7	100	7	100
149418	103	110	103	140	113	56	74	12297	ST-1150 complex	37	1771214	7	100	7	100
149421	247	748	30	82	189	47	17	10266		61	1832960	7	100	7	100
149814	33	39	30	82	113	897	17	11957	ST-828 complex	41	1700012	7	100	7	100
149817	441	39	30	82	113	47	17	10294	ST-828 complex	84	1859297	7	100	7	100
149818	103	110	30	833	113	164	79	10236		25	1709130	7	100	7	100
149820	33	39	30	82	113	631	17	8408	ST-828 complex	63	1866708	7	100	7	100
149821	247	748	30	82	189	47	17	10266		57	1795294	7	100	7	100
149822	247	748	30	82	189	47	17	10266		57	1781894	7	100	7	100
149826	33	39	30	82	113	631	17	8408	ST-828 complex	67	1870188	7	100	7	100
149830	33	39	30	82	113	897	17	11957	ST-828 complex	29	1693023	7	100	7	100
149834	33	39	30	82	113	43	17	829	ST-828 complex	19	1670953	7	100	7	100
149838	103	110	103	833	113	164	120	11963		42	1731977	7	100	7	100
149845	33	39	30	82	113	43	17	829	ST-828 complex	17	1670349	7	100	7	100
149848	33	39	30	82	113	43	17	829	ST-828 complex	24	1677942	7	100	7	100
149852	33	39	30	82	113	897	17	11957	ST-828 complex	49	1737781	7	100	7	100
149854	247	748	30	82	189	47	17	10266		63	1783672	7	100	7	100
149859	247	748	30	82	113	47	17	10234		65	1813952	7	100	7	100
149868	103	110	103	140	210	899	79	11961	ST-1150 complex	38	1770932	7	100	7	100
149869	103	110	103	140	210	899	79	11961	ST-1150 complex	40	1773072	7	100	7	100
149872	33	39	30	82	113	47	17	825	ST-828 complex	73	1836032	7	100	7	100
149874	33	39	30	82	113	47	17	825	ST-828 complex	79	1838052	7	100	7	100
149876	33	748	30	82	113	47	17	11965	ST-828 complex	72	1820262	7	100	7	100
149880	33	39	30	82	113	47	17	825	ST-828 complex	55	1846592	7	100	7	100
149881	33	39	30	82	113	43	17	829	ST-828 complex	27	1680136	7	100	7	100
149884	33	39	30	677	113	206	17	10042	ST-828 complex	21	1647481	7	100	7	100
149885	33	39	30	677	113	206	17	10042	ST-828 complex	19	1647672	7	100	7	100
149886	33	39	30	677	113	206	17	10042	ST-828 complex	20	1647800	7	100	7	100
149887	33	39	30	82	113	631	17	8408	ST-828 complex	84	1851128	7	100	7	100
149888	103	110	103	833	113	1125	79	13537	ST-1150 complex	33	1734038	7	100	7	100
149889	33	39	30	82	113	631	17	8408	ST-828 complex	91	1907055	7	100	7	100
149890	103	110	103	833	113	1125	79	13537	ST-1150 complex	46	1736688	7	100	7	100
149891	103	110	103	833	113	1125	79	13537	ST-1150 complex	51	1734241	7	100	7	100
149892	33	39	30	677	113	206	17	10042	ST-828 complex	19	1647787	7	100	7	100
149893	103	110	103	833	113	1125	79	13537	ST-1150 complex	54	1736642	7	100	7	100
149896	247	748	30	82	189	47	17	10266		57	1787823	7	100	7	100
149904	33	38	30	79	952	35	17	14163		42	1748202	7	100	7	100
149905	33	38	30	167	104	173	68	11078		46	1696943	7	100	7	100
149906	33	38	30	167	104	173	68	11078		34	1733173	7	100	7	100
149907	33	1019	30	79	104	35	17	14205	ST-828 complex	71	1815218	7	100	7	100
149909	247	748	30	82	189	47	17	10266		66	1786922	7	100	7	100
149911	33	39	30	82	104	35	36	2715	ST-828 complex	47	1771696	7	100	7	100
149912	33	38	30	79	104	35	17	2642	ST-828 complex	53	1833919	7	100	7	100
149914	33	38	30	81	104	44	36	10848		31	1697965	7	100	7	100
149915	53	38	44	82	104	44	36	14164		27	1775099	7	100	7	100
149920	33	38	30	79	763	35	17	13411		29	1730926	7	100	7	100
149921	33	39	30	82	104	47	17	1055	ST-828 complex	34	1734951	7	100	7	100

## Sheet: Table_S3_pangenome
Supplementary table S3: PIRATE output of gene family presence in the pangenome
Gene	Non-unique Gene name	Annotation	No. isolates	No. sequences	Avg sequences per isolate	Genome Fragment	Order within Fragment	Accessory Fragment	Accessory Order with Fragment	QC	Min group size nuc	Max group size nuc	Avg group size nuc	105577_PA010	105578_PA017	105579_PA026	105580_PA028	105581_PA029	105583_PA031	105584_PA032	105585_PA033	105586_PA034	105587_PA040	105590_PA048	105593_PA061	105594_PA062	105597_PA065	105601_PA070	105614_PA093	105616_PV004	105636_PV086	105640_PV091	105642_PV093	105746_cerdo_0_1_C1	105747_cerdo_0_1_C2	108479_3070	108481_3072	108483_3074	108486_3077	108491_3082	108492_3083	108494_3085	108498_3089	108504_3095	108508_3099	108524_3325	108528_3330	108546_3348	112371_CAM000139_1663
g00003_00006__g00003	rpsJ	30S ribosomal protein S10	460	0	1	1	1	NA	NA		rpsJ(460)	312	312	105577_PA010_00053	105578_PA017_00787	105579_PA026_00337	105580_PA028_00828	105581_PA029_00053	105583_PA031_00411	105584_PA032_00402	105585_PA033_00053	105586_PA034_00485	105587_PA040_01167	105590_PA048_00686	105593_PA061_00053	105594_PA062_00226	105597_PA065_00536	105601_PA070_00815	105614_PA093_00831	105616_PV004_00607	105636_PV086_01064	105640_PV091_00955	105642_PV093_00767	105746_cerdo_0_1_C1_01152	105747_cerdo_0_1_C2_01129	108479_3070_00425	108481_3072_00928	108483_3074_00281	108486_3077_00001	108491_3082_00315	108492_3083_00539	108494_3085_00037	108498_3089_00252	108504_3095_00639	108508_3099_00317	108524_3325_00392	108528_3330_00270	108546_3348_00168	112371_CAM000139_1663_01314
g02026_00004__g02026	rplC	hypothetical protein	460	0	1	1	2	NA	NA		NA(458):rplC(2)	576	576	105577_PA010_00054	105578_PA017_00788	105579_PA026_00338	105580_PA028_00829	105581_PA029_00054	105583_PA031_00412	105584_PA032_00403	105585_PA033_00054	105586_PA034_00486	105587_PA040_01168	105590_PA048_00687	105593_PA061_00054	105594_PA062_00227	105597_PA065_00537	105601_PA070_00816	105614_PA093_00832	105616_PV004_00608	105636_PV086_01065	105640_PV091_00956	105642_PV093_00768	105746_cerdo_0_1_C1_01153	105747_cerdo_0_1_C2_01130	108479_3070_00424	108481_3072_00929	108483_3074_00282	108486_3077_00002	108491_3082_00316	108492_3083_00540	108494_3085_00036	108498_3089_00253	108504_3095_00640	108508_3099_00316	108524_3325_00391	108528_3330_00269	108546_3348_00167	112371_CAM000139_1663_01313
g01640_00005__g01640	rplD	50S ribosomal protein L4	460	0	1	1	3	NA	NA		rplD(459):NA(1)	297	615	105577_PA010_00055	105578_PA017_00789	105579_PA026_00339	105580_PA028_00830	105581_PA029_00055	105583_PA031_00413	105584_PA032_00404	105585_PA033_00055	105586_PA034_00487	105587_PA040_01169	105590_PA048_00688	105593_PA061_00055	105594_PA062_00228	105597_PA065_00538	105601_PA070_00817	105614_PA093_00833	105616_PV004_00609	105636_PV086_01066	105640_PV091_00957	105642_PV093_00769	105746_cerdo_0_1_C1_01154	105747_cerdo_0_1_C2_01131	108479_3070_00423	108481_3072_00930	108483_3074_00283	108486_3077_00003	108491_3082_00317	108492_3083_00541	108494_3085_00035	108498_3089_00254	108504_3095_00641	108508_3099_00315	108524_3325_00390	108528_3330_00268	108546_3348_00166	112371_CAM000139_1663_01312
g01742_00005__g01742	rplW	50S ribosomal protein L23	460	0	1	1	4	NA	NA		rplW(460)	282	282	105577_PA010_00056	105578_PA017_00790	105579_PA026_00340	105580_PA028_00831	105581_PA029_00056	105583_PA031_00414	105584_PA032_00405	105585_PA033_00056	105586_PA034_00488	105587_PA040_01170	105590_PA048_00689	105593_PA061_00056	105594_PA062_00229	105597_PA065_00539	105601_PA070_00818	105614_PA093_00834	105616_PV004_00610	105636_PV086_01067	105640_PV091_00958	105642_PV093_00770	105746_cerdo_0_1_C1_01155	105747_cerdo_0_1_C2_01132	108479_3070_00422	108481_3072_00931	108483_3074_00284	108486_3077_00004	108491_3082_00318	108492_3083_00542	108494_3085_00034	108498_3089_00255	108504_3095_00642	108508_3099_00314	108524_3325_00389	108528_3330_00267	108546_3348_00165	112371_CAM000139_1663_01311
g00009_00006__g00009	rplB	50S ribosomal protein L2	460	0	1	1	5	NA	NA		rplB(460)	831	831	105577_PA010_00057	105578_PA017_00791	105579_PA026_00341	105580_PA028_00832	105581_PA029_00057	105583_PA031_00415	105584_PA032_00406	105585_PA033_00057	105586_PA034_00489	105587_PA040_01171	105590_PA048_00690	105593_PA061_00057	105594_PA062_00230	105597_PA065_00540	105601_PA070_00819	105614_PA093_00835	105616_PV004_00611	105636_PV086_01068	105640_PV091_00959	105642_PV093_00771	105746_cerdo_0_1_C1_01156	105747_cerdo_0_1_C2_01133	108479_3070_00421	108481_3072_00932	108483_3074_00285	108486_3077_00005	108491_3082_00319	108492_3083_00543	108494_3085_00033	108498_3089_00256	108504_3095_00643	108508_3099_00313	108524_3325_00388	108528_3330_00266	108546_3348_00164	112371_CAM000139_1663_01310
g01741_1_00009__g01741_1	rpsS	30S ribosomal protein S19	460	0	1	1	6	NA	NA		rpsS(460)	282	282	105577_PA010_00058	105578_PA017_00792	105579_PA026_00342	105580_PA028_00833	105581_PA029_00058	105583_PA031_00416	105584_PA032_00407	105585_PA033_00058	105586_PA034_00490	105587_PA040_01172	105590_PA048_00691	105593_PA061_00058	105594_PA062_00231	105597_PA065_00541	105601_PA070_00820	105614_PA093_00836	105616_PV004_00612	105636_PV086_01069	105640_PV091_00960	105642_PV093_00772	105746_cerdo_0_1_C1_01157	105747_cerdo_0_1_C2_01134	108479_3070_00420	108481_3072_00933	108483_3074_00286	108486_3077_00006	108491_3082_00320	108492_3083_00544	108494_3085_00032	108498_3089_00257	108504_3095_00644	108508_3099_00312	108524_3325_00387	108528_3330_00265	108546_3348_00163	112371_CAM000139_1663_01309
g01699_00005__g01699	NA	hypothetical protein	460	0	1	1	7	NA	NA		NA(461)	333	426	105577_PA010_00059	105578_PA017_00793	105579_PA026_00343	105580_PA028_00834	105581_PA029_00059	105583_PA031_00417	105584_PA032_00408	105585_PA033_00059	105586_PA034_00491	105587_PA040_01173	105590_PA048_00692	105593_PA061_00059	105594_PA062_00232	105597_PA065_00542	105601_PA070_00821	105614_PA093_00837	105616_PV004_00613	105636_PV086_01070	105640_PV091_00961	105642_PV093_00773	105746_cerdo_0_1_C1_01158	105747_cerdo_0_1_C2_01135	108479_3070_00419	108481_3072_00934	108483_3074_00287	108486_3077_00007	108491_3082_00321	108492_3083_00545	108494_3085_00031	108498_3089_00258	108504_3095_00645	108508_3099_00311	108524_3325_00386	108528_3330_00264	108546_3348_00162	112371_CAM000139_1663_01308
g00016_00006__g00016	rplP	50S ribosomal protein L16	460	0	1	1	8	NA	NA		rplP(460)	426	426	105577_PA010_00061	105578_PA017_00795	105579_PA026_00345	105580_PA028_00836	105581_PA029_00061	105583_PA031_00419	105584_PA032_00410	105585_PA033_00061	105586_PA034_00493	105587_PA040_01175	105590_PA048_00694	105593_PA061_00061	105594_PA062_00234	105597_PA065_00544	105601_PA070_00823	105614_PA093_00839	105616_PV004_00615	105636_PV086_01072	105640_PV091_00963	105642_PV093_00775	105746_cerdo_0_1_C1_01160	105747_cerdo_0_1_C2_01137	108479_3070_00417	108481_3072_00936	108483_3074_00289	108486_3077_00009	108491_3082_00323	108492_3083_00547	108494_3085_00029	108498_3089_00260	108504_3095_00647	108508_3099_00309	108524_3325_00384	108528_3330_00262	108546_3348_00160	112371_CAM000139_1663_01306
g01772_00005__g01772	NA	hypothetical protein	460	0	1	1	9	NA	NA		NA(460)	186	186	105577_PA010_00062	105578_PA017_00796	105579_PA026_00346	105580_PA028_00837	105581_PA029_00062	105583_PA031_00420	105584_PA032_00411	105585_PA033_00062	105586_PA034_00494	105587_PA040_01176	105590_PA048_00695	105593_PA061_00062	105594_PA062_00235	105597_PA065_00545	105601_PA070_00824	105614_PA093_00840	105616_PV004_00616	105636_PV086_01073	105640_PV091_00964	105642_PV093_00776	105746_cerdo_0_1_C1_01161	105747_cerdo_0_1_C2_01138	108479_3070_00416	108481_3072_00937	108483_3074_00290	108486_3077_00010	108491_3082_00324	108492_3083_00548	108494_3085_00028	108498_3089_00261	108504_3095_00648	108508_3099_00308	108524_3325_00383	108528_3330_00261	108546_3348_00159	112371_CAM000139_1663_01305
g00028_00006__g00028	rpsQ	30S ribosomal protein S17	460	0	1	1	10	NA	NA		rpsQ(460)	252	252	105577_PA010_00063	105578_PA017_00797	105579_PA026_00347	105580_PA028_00838	105581_PA029_00063	105583_PA031_00421	105584_PA032_00412	105585_PA033_00063	105586_PA034_00495	105587_PA040_01177	105590_PA048_00696	105593_PA061_00063	105594_PA062_00236	105597_PA065_00546	105601_PA070_00825	105614_PA093_00841	105616_PV004_00617	105636_PV086_01074	105640_PV091_00965	105642_PV093_00777	105746_cerdo_0_1_C1_01162	105747_cerdo_0_1_C2_01139	108479_3070_00415	108481_3072_00938	108483_3074_00291	108486_3077_00011	108491_3082_00325	108492_3083_00549	108494_3085_00027	108498_3089_00262	108504_3095_00649	108508_3099_00307	108524_3325_00382	108528_3330_00260	108546_3348_00158	112371_CAM000139_1663_01304
g02862_00006__g02862	rplN	50S ribosomal protein L14	460	0	1	1	11	NA	NA		rplN(461)	312	369	105577_PA010_00064	105578_PA017_00798	105579_PA026_00348	105580_PA028_00839	105581_PA029_00064	105583_PA031_00422;105583_PA031_01964	105584_PA032_00413	105585_PA033_00064	105586_PA034_00496	105587_PA040_01178	105590_PA048_00697	105593_PA061_00064	105594_PA062_00237	105597_PA065_00547	105601_PA070_00826	105614_PA093_00842	105616_PV004_00618	105636_PV086_01075	105640_PV091_00966	105642_PV093_00778	105746_cerdo_0_1_C1_01163	105747_cerdo_0_1_C2_01140	108479_3070_00414	108481_3072_00939	108483_3074_00292	108486_3077_00012	108491_3082_00326	108492_3083_00550	108494_3085_00026	108498_3089_00263	108504_3095_00650	108508_3099_00306	108524_3325_00381	108528_3330_00259	108546_3348_00157	112371_CAM000139_1663_01303
g00063_00006__g00063	flgG	Flagellar basal-body rod protein FlgG	460	0	1	2	1	NA	NA		flgG(460)	372	792	105577_PA010_00775	105578_PA017_01258	105579_PA026_00544	105580_PA028_00363	105581_PA029_00357	105583_PA031_00174	105584_PA032_00193	105585_PA033_00389	105586_PA034_00037	105587_PA040_00392	105590_PA048_00368	105593_PA061_00383	105594_PA062_00160	105597_PA065_00214	105601_PA070_01200	105614_PA093_00534	105616_PV004_00037	105636_PV086_00625	105640_PV091_01061	105642_PV093_00616	105746_cerdo_0_1_C1_00692	105747_cerdo_0_1_C2_00491	108479_3070_00037	108481_3072_00438	108483_3074_01137	108486_3077_01203	108491_3082_00599	108492_3083_01201	108494_3085_00490	108498_3089_00900	108504_3095_00885	108508_3099_01036	108524_3325_01084	108528_3330_00476	108546_3348_01520	112371_CAM000139_1663_00478
g01807_00005__g01807	glnA	Glutamine synthetase	460	0	1	2	2	NA	NA		glnA(460)	1221	1431	105577_PA010_00774	105578_PA017_01257	105579_PA026_00543	105580_PA028_00362	105581_PA029_00356	105583_PA031_00173	105584_PA032_00192	105585_PA033_00388	105586_PA034_00036	105587_PA040_00391	105590_PA048_00367	105593_PA061_00382	105594_PA062_00159	105597_PA065_00213	105601_PA070_01199	105614_PA093_00533	105616_PV004_00036	105636_PV086_00624	105640_PV091_01060	105642_PV093_00615	105746_cerdo_0_1_C1_00693	105747_cerdo_0_1_C2_00490	108479_3070_00036	108481_3072_00439	108483_3074_01136	108486_3077_01202	108491_3082_00598	108492_3083_00923	108494_3085_00771	108498_3089_00901	108504_3095_00886	108508_3099_01037	108524_3325_01502	108528_3330_00477	108546_3348_01549	112371_CAM000139_1663_00477
g01310_00004__g01310	NA	hypothetical protein	460	0	1	2	3	NA	NA		NA(460)	570	705	105577_PA010_00773	105578_PA017_01256	105579_PA026_00542	105580_PA028_00361	105581_PA029_00355	105583_PA031_00172	105584_PA032_00191	105585_PA033_00387	105586_PA034_00035	105587_PA040_00390	105590_PA048_00366	105593_PA061_00381	105594_PA062_00158	105597_PA065_00212	105601_PA070_01198	105614_PA093_00532	105616_PV004_00035	105636_PV086_00623	105640_PV091_01059	105642_PV093_00614	105746_cerdo_0_1_C1_00694	105747_cerdo_0_1_C2_00489	108479_3070_00035	108481_3072_00440	108483_3074_01635	108486_3077_00616	108491_3082_00597	108492_3083_00924	108494_3085_00772	108498_3089_00902	108504_3095_00887	108508_3099_01038	108524_3325_00742	108528_3330_00478	108546_3348_01217	112371_CAM000139_1663_00476
g01823_00005__g01823	rlhA	hypothetical protein	460	0	1	2	4	NA	NA		NA(460):rlhA(2)	204	1257	105577_PA010_00772	105578_PA017_01255	105579_PA026_00541	105580_PA028_00360	105581_PA029_00354	105583_PA031_00171	105584_PA032_00190	105585_PA033_00386	105586_PA034_00034	105587_PA040_00389	105590_PA048_00365	105593_PA061_00380	105594_PA062_00157	105597_PA065_00211	105601_PA070_01197	105614_PA093_00531	105616_PV004_00034	105636_PV086_00622	105640_PV091_01058	105642_PV093_00613	105746_cerdo_0_1_C1_00695	105747_cerdo_0_1_C2_00488	108479_3070_00034	108481_3072_00441	108483_3074_01634	108486_3077_00617	108491_3082_00596	108492_3083_00925	108494_3085_00773	108498_3089_00903	108504_3095_00888	108508_3099_01039	108524_3325_00743	108528_3330_00479	108546_3348_01216	112371_CAM000139_1663_00475
g01677_00005__g01677	purE	N5-carboxyaminoimidazole ribonucleotide mutase	460	0	1	2	5	NA	NA		purE(460)	495	495	105577_PA010_00771	105578_PA017_01254	105579_PA026_00540	105580_PA028_00359	105581_PA029_00353	105583_PA031_00170	105584_PA032_00189	105585_PA033_00385	105586_PA034_00033	105587_PA040_00388	105590_PA048_00364	105593_PA061_00379	105594_PA062_00156	105597_PA065_00210	105601_PA070_01196	105614_PA093_00530	105616_PV004_00033	105636_PV086_00621	105640_PV091_01057	105642_PV093_00612	105746_cerdo_0_1_C1_00696	105747_cerdo_0_1_C2_00487	108479_3070_00033	108481_3072_00442	108483_3074_01633	108486_3077_00618	108491_3082_00595	108492_3083_00926	108494_3085_00774	108498_3089_00904	108504_3095_00889	108508_3099_01040	108524_3325_00744	108528_3330_00480	108546_3348_01215	112371_CAM000139_1663_00474
g01657_1_00005__g01657_1	NA	hypothetical protein	460	0	1	2	6	NA	NA		NA(460)	222	555	105577_PA010_00770	105578_PA017_01253	105579_PA026_00539	105580_PA028_00358	105581_PA029_00352	105583_PA031_00169	105584_PA032_00188	105585_PA033_00384	105586_PA034_00032	105587_PA040_00387	105590_PA048_00363	105593_PA061_00378	105594_PA062_00155	105597_PA065_00209	105601_PA070_01195	105614_PA093_00529	105616_PV004_00032	105636_PV086_00620	105640_PV091_01056	105642_PV093_00611	105746_cerdo_0_1_C1_00697	105747_cerdo_0_1_C2_00486	108479_3070_00032	108481_3072_00443	108483_3074_01632	108486_3077_00619	108491_3082_00594	108492_3083_00927	108494_3085_00775	108498_3089_00905	108504_3095_00890	108508_3099_01041	108524_3325_00745	108528_3330_00481	108546_3348_01214	112371_CAM000139_1663_00473
g00014_00006__g00014	glyQ	Glycine--tRNA ligase alpha subunit	460	0	1	2	7	NA	NA		glyQ(460)	165	864	105577_PA010_00769	105578_PA017_01252	105579_PA026_00538	105580_PA028_00357	105581_PA029_00351	105583_PA031_00168	105584_PA032_00187	105585_PA033_00383	105586_PA034_00031	105587_PA040_00386	105590_PA048_00362	105593_PA061_00377	105594_PA062_00154	105597_PA065_00208	105601_PA070_01194	105614_PA093_00528	105616_PV004_00031	105636_PV086_00619	105640_PV091_01055	105642_PV093_00610	105746_cerdo_0_1_C1_00698	105747_cerdo_0_1_C2_00485	108479_3070_00031	108481_3072_00444	108483_3074_01631	108486_3077_00620	108491_3082_00593	108492_3083_00928	108494_3085_00776	108498_3089_00906	108504_3095_00891	108508_3099_01042	108524_3325_00746	108528_3330_00482	108546_3348_01213	112371_CAM000139_1663_00472
g00061_00006__g00061	atpA	ATP synthase subunit alpha	460	0	1	3	1	NA	NA		atpA(460)	1323	1506	105577_PA010_00100	105578_PA017_00834	105579_PA026_00384	105580_PA028_00875	105581_PA029_00100	105583_PA031_00460	105584_PA032_00449	105585_PA033_00102	105586_PA034_00532	105587_PA040_01216	105590_PA048_00733	105593_PA061_00100	105594_PA062_00273	105597_PA065_00583	105601_PA070_00862	105614_PA093_00879	105616_PV004_00905	105636_PV086_01111	105640_PV091_01002	105642_PV093_00814	105746_cerdo_0_1_C1_01212	105747_cerdo_0_1_C2_01189	108479_3070_00378	108481_3072_00892	108483_3074_00328	108486_3077_00048	108491_3082_00117	108492_3083_00138	108494_3085_00133	108498_3089_00299	108504_3095_00775	108508_3099_00749	108524_3325_00322	108528_3330_00824	108546_3348_00316	112371_CAM000139_1663_01267
g01563_1_00005__g01563_1	atpG	ATP synthase gamma chain%2C sodium ion specific	460	0	1	3	2	NA	NA		atpG(460)	186	885	105577_PA010_00101	105578_PA017_00835	105579_PA026_00385	105580_PA028_00876	105581_PA029_00101	105583_PA031_00461	105584_PA032_00450	105585_PA033_00103	105586_PA034_00533	105587_PA040_01217	105590_PA048_00734	105593_PA061_00101	105594_PA062_00274	105597_PA065_00584	105601_PA070_00863	105614_PA093_00880	105616_PV004_00906	105636_PV086_01112	105640_PV091_01003	105642_PV093_00815	105746_cerdo_0_1_C1_01213	105747_cerdo_0_1_C2_01190	108479_3070_00377	108481_3072_00891	108483_3074_00329	108486_3077_00049	108491_3082_00116	108492_3083_00137	108494_3085_00134	108498_3089_00300	108504_3095_00774	108508_3099_00750	108524_3325_00323	108528_3330_00823	108546_3348_00317	112371_CAM000139_1663_01266
g00008_00006__g00008	atpD	ATP synthase subunit beta	460	0	1	3	3	NA	NA		atpD(460)	813	1398	105577_PA010_00102	105578_PA017_00836	105579_PA026_00386	105580_PA028_00877	105581_PA029_00102	105583_PA031_00462	105584_PA032_00451	105585_PA033_00104	105586_PA034_00534	105587_PA040_01218	105590_PA048_00735	105593_PA061_00102	105594_PA062_00275	105597_PA065_00585	105601_PA070_00864	105614_PA093_00881	105616_PV004_00907	105636_PV086_01113	105640_PV091_01004	105642_PV093_00816	105746_cerdo_0_1_C1_01214	105747_cerdo_0_1_C2_01191	108479_3070_00376	108481_3072_00890	108483_3074_00330	108486_3077_00050	108491_3082_00115	108492_3083_00136	108494_3085_00135	108498_3089_00301	108504_3095_00773	108508_3099_00751	108524_3325_00324	108528_3330_00822	108546_3348_00318	112371_CAM000139_1663_01265
g01710_1_00013__g01710_1	atpC	ATP synthase epsilon chain	460	0	1	3	4	NA	NA		atpC(461)	165	390	105577_PA010_00103	105578_PA017_00837	105579_PA026_00387	105580_PA028_00878	105581_PA029_00103	105583_PA031_00463	105584_PA032_00452	105585_PA033_00105	105586_PA034_00535	105587_PA040_01219	105590_PA048_00736	105593_PA061_00103	105594_PA062_00276	105597_PA065_00586	105601_PA070_00865	105614_PA093_00882	105616_PV004_00908	105636_PV086_01114	105640_PV091_01005	105642_PV093_00817	105746_cerdo_0_1_C1_01215	105747_cerdo_0_1_C2_01192	108479_3070_00375	108481_3072_00889	108483_3074_00331	108486_3077_00051	108491_3082_00114	108492_3083_00135	108494_3085_00136	108498_3089_00302	108504_3095_00772	108508_3099_00752	108524_3325_00325	108528_3330_00821	108546_3348_00319	112371_CAM000139_1663_01264
g02034_00005__g02034	tolQ	Tol-Pal system protein TolQ	460	0	1	3	5	NA	NA		tolQ(460)	555	555	105577_PA010_00104	105578_PA017_00838	105579_PA026_00388	105580_PA028_00879	105581_PA029_00104	105583_PA031_00464	105584_PA032_00453	105585_PA033_00106	105586_PA034_00536	105587_PA040_01220	105590_PA048_00737	105593_PA061_00104	105594_PA062_00277	105597_PA065_00587	105601_PA070_00866	105614_PA093_00883	105616_PV004_00909	105636_PV086_01115	105640_PV091_01006	105642_PV093_00818	105746_cerdo_0_1_C1_01216	105747_cerdo_0_1_C2_01193	108479_3070_00374	108481_3072_00888	108483_3074_00332	108486_3077_00052	108491_3082_00113	108492_3083_00134	108494_3085_00137	108498_3089_00303	108504_3095_00771	108508_3099_00753	108524_3325_00326	108528_3330_00820	108546_3348_00320	112371_CAM000139_1663_01263
g00879_1_00010__g00879_1	exbD	Biopolymer transport protein ExbD	460	0	1	3	6	NA	NA		exbD(460)	336	390	105577_PA010_00105	105578_PA017_00839	105579_PA026_00389	105580_PA028_00880	105581_PA029_00105	105583_PA031_00465	105584_PA032_00454	105585_PA033_00107	105586_PA034_00537	105587_PA040_01221	105590_PA048_00738	105593_PA061_00105	105594_PA062_00278	105597_PA065_00588	105601_PA070_00867	105614_PA093_00884	105616_PV004_00910	105636_PV086_01116	105640_PV091_01007	105642_PV093_00819	105746_cerdo_0_1_C1_01217	105747_cerdo_0_1_C2_01194	108479_3070_00373	108481_3072_00887	108483_3074_00333	108486_3077_00053	108491_3082_00112	108492_3083_00133	108494_3085_00138	108498_3089_00304	108504_3095_00770	108508_3099_00754	108524_3325_00327	108528_3330_00819	108546_3348_00321	112371_CAM000139_1663_01262
g01021_00004__g01021	NA	hypothetical protein	460	0	1	3	7	NA	NA		NA(460)	621	777	105577_PA010_00106	105578_PA017_00840	105579_PA026_00390	105580_PA028_00881	105581_PA029_00106	105583_PA031_00466	105584_PA032_00455	105585_PA033_00108	105586_PA034_00538	105587_PA040_01222	105590_PA048_00739	105593_PA061_00106	105594_PA062_00279	105597_PA065_00589	105601_PA070_00868	105614_PA093_00885	105616_PV004_00911	105636_PV086_01117	105640_PV091_01008	105642_PV093_00820	105746_cerdo_0_1_C1_01218	105747_cerdo_0_1_C2_01195	108479_3070_00372	108481_3072_00886	108483_3074_00334	108486_3077_00054	108491_3082_00111	108492_3083_00132	108494_3085_00139	108498_3089_00305	108504_3095_00769	108508_3099_00755	108524_3325_00328	108528_3330_00818	108546_3348_00322	112371_CAM000139_1663_01261
g00002_00006__g00002	ndk	Nucleoside diphosphate kinase	460	0	1	4	1	NA	NA		ndk(460)	204	414	105577_PA010_00348	105578_PA017_00499	105579_PA026_00238	105580_PA028_00258	105581_PA029_00788	105583_PA031_00344	105584_PA032_00385	105585_PA033_00322	105586_PA034_01548	105587_PA040_00266	105590_PA048_00250	105593_PA061_00526	105594_PA062_01389	105597_PA065_00096	105601_PA070_00545	105614_PA093_00375	105616_PV004_00459	105636_PV086_01412	105640_PV091_00082	105642_PV093_00084	105746_cerdo_0_1_C1_01001	105747_cerdo_0_1_C2_00826	108479_3070_00168	108481_3072_00195	108483_3074_01034	108486_3077_01056	108491_3082_00217	108492_3083_00986	108494_3085_01077	108498_3089_01367	108504_3095_01219	108508_3099_00858	108524_3325_00976	108528_3330_00039	108546_3348_00693	112371_CAM000139_1663_00991
g01719_00005__g01719	NA	hypothetical protein	460	0	1	4	2	NA	NA		NA(460)	345	360	105577_PA010_00349	105578_PA017_00500	105579_PA026_00237	105580_PA028_00259	105581_PA029_00789	105583_PA031_00345	105584_PA032_00386	105585_PA033_00321	105586_PA034_01549	105587_PA040_00267	105590_PA048_00251	105593_PA061_00525	105594_PA062_01390	105597_PA065_00097	105601_PA070_00546	105614_PA093_00376	105616_PV004_00460	105636_PV086_01413	105640_PV091_00081	105642_PV093_00083	105746_cerdo_0_1_C1_01000	105747_cerdo_0_1_C2_00827	108479_3070_00167	108481_3072_00194	108483_3074_01035	108486_3077_01057	108491_3082_00218	108492_3083_00985	108494_3085_01076	108498_3089_01366	108504_3095_01220	108508_3099_00857	108524_3325_00975	108528_3330_00040	108546_3348_00692	112371_CAM000139_1663_00990
g01138_00005__g01138	rpmF	50S ribosomal protein L32	460	0	1	4	3	NA	NA		rpmF(460)	147	147	105577_PA010_00350	105578_PA017_00501	105579_PA026_00236	105580_PA028_00260	105581_PA029_00790	105583_PA031_00346	105584_PA032_00387	105585_PA033_00320	105586_PA034_01550	105587_PA040_00268	105590_PA048_00252	105593_PA061_00524	105594_PA062_01391	105597_PA065_00098	105601_PA070_00547	105614_PA093_00377	105616_PV004_00461	105636_PV086_01414	105640_PV091_00080	105642_PV093_00082	105746_cerdo_0_1_C1_00999	105747_cerdo_0_1_C2_00828	108479_3070_00166	108481_3072_00193	108483_3074_01036	108486_3077_01058	108491_3082_00219	108492_3083_00984	108494_3085_01075	108498_3089_01365	108504_3095_01221	108508_3099_00856	108524_3325_00974	108528_3330_00041	108546_3348_00691	112371_CAM000139_1663_00989
g00981_1_00009__g00981_1	plsX	Phosphate acyltransferase	460	0	1	4	4	NA	NA		plsX(460)	987	987	105577_PA010_00351	105578_PA017_00502	105579_PA026_00235	105580_PA028_00261	105581_PA029_00791	105583_PA031_00347	105584_PA032_00388	105585_PA033_00319	105586_PA034_01551	105587_PA040_00269	105590_PA048_00253	105593_PA061_00523	105594_PA062_01392	105597_PA065_00099	105601_PA070_00548	105614_PA093_00378	105616_PV004_00462	105636_PV086_01415	105640_PV091_00079	105642_PV093_00081	105746_cerdo_0_1_C1_00998	105747_cerdo_0_1_C2_00829	108479_3070_00165	108481_3072_00192	108483_3074_01037	108486_3077_01059	108491_3082_00220	108492_3083_00983	108494_3085_01074	108498_3089_01364	108504_3095_01222	108508_3099_00855	108524_3325_00973	108528_3330_00042	108546_3348_00690	112371_CAM000139_1663_00988
g00984_1_00006__g00984_1	fabH	3-oxoacyl-[acyl-carrier-protein] synthase 3	460	0	1	4	5	NA	NA		fabH(461)	354	978	105577_PA010_00352	105578_PA017_00503	105579_PA026_00234	105580_PA028_00262	105581_PA029_00792	105583_PA031_00348	105584_PA032_00389	105585_PA033_00318	105586_PA034_01552	105587_PA040_00270	105590_PA048_00254	105593_PA061_00522	105594_PA062_01393	105597_PA065_00100	105601_PA070_00549	105614_PA093_00379	105616_PV004_00463	105636_PV086_01416	105640_PV091_00078	105642_PV093_00080	105746_cerdo_0_1_C1_00997	105747_cerdo_0_1_C2_00830	108479_3070_00164	108481_3072_00191	108483_3074_01038	108486_3077_01060	108491_3082_00221	108492_3083_00982	108494_3085_01073	108498_3089_01363	108504_3095_01223	108508_3099_00854	108524_3325_00972	108528_3330_00043	108546_3348_00689	112371_CAM000139_1663_00987
g00283_1_00007__g00283_1	serC	Phosphoserine aminotransferase	460	0	1	4	6	NA	NA		serC(460)	126	1077	105577_PA010_00353	105578_PA017_00504	105579_PA026_00233	105580_PA028_00263	105581_PA029_00793	105583_PA031_00349	105584_PA032_00390	105585_PA033_00317	105586_PA034_01553	105587_PA040_00271	105590_PA048_00255	105593_PA061_00521	105594_PA062_01394	105597_PA065_00101	105601_PA070_00550	105614_PA093_00380	105616_PV004_00464	105636_PV086_01417	105640_PV091_00077	105642_PV093_00079	105746_cerdo_0_1_C1_00996	105747_cerdo_0_1_C2_00831	108479_3070_00163	108481_3072_00190	108483_3074_01039	108486_3077_01061	108491_3082_00222	108492_3083_00981	108494_3085_01072	108498_3089_01362	108504_3095_01224	108508_3099_00853	108524_3325_00971	108528_3330_00044	108546_3348_00688	112371_CAM000139_1663_00986
g01559_00005__g01559	mdh	Malate dehydrogenase	460	0	1	5	1	NA	NA		mdh(461)	300	909	105577_PA010_00223	105578_PA017_00306	105579_PA026_00717	105580_PA028_00587	105581_PA029_01177	105583_PA031_00083	105584_PA032_00069	105585_PA033_00639	105586_PA034_00166	105587_PA040_00072	105590_PA048_00583	105593_PA061_00841	105594_PA062_00097	105597_PA065_01448	105601_PA070_00714	105614_PA093_00067	105616_PV004_00836	105636_PV086_00526	105640_PV091_00247	105642_PV093_00923	105746_cerdo_0_1_C1_00553	105747_cerdo_0_1_C2_00630	108479_3070_00296	108481_3072_00028	108483_3074_00013	108486_3077_00229	108491_3082_00071	108492_3083_00649	108494_3085_00488	108498_3089_00014	108504_3095_00479	108508_3099_00049	108524_3325_00933	108528_3330_00092	108546_3348_01273	112371_CAM000139_1663_00607
g01864_00005__g01864	sucC	Succinate--CoA ligase [ADP-forming] subunit beta	460	0	1	5	2	NA	NA		sucC(460)	816	1164	105577_PA010_00224	105578_PA017_00305	105579_PA026_00718	105580_PA028_00588	105581_PA029_01178	105583_PA031_00084	105584_PA032_00068	105585_PA033_00640	105586_PA034_00165	105587_PA040_00071	105590_PA048_00584	105593_PA061_00842	105594_PA062_00098	105597_PA065_01449	105601_PA070_00715	105614_PA093_00066	105616_PV004_00837	105636_PV086_00527	105640_PV091_00246	105642_PV093_00922	105746_cerdo_0_1_C1_00554	105747_cerdo_0_1_C2_00629	108479_3070_00297	108481_3072_00027	108483_3074_00012	108486_3077_00228	108491_3082_00072	108492_3083_00650	108494_3085_00487	108498_3089_00013	108504_3095_00478	108508_3099_00048	108524_3325_00932	108528_3330_00091	108546_3348_01223	112371_CAM000139_1663_00606
g00039_00006__g00039	sucD	Succinate--CoA ligase [ADP-forming] subunit alpha	460	0	1	5	3	NA	NA		sucD(460)	870	870	105577_PA010_00225	105578_PA017_00304	105579_PA026_00719	105580_PA028_00589	105581_PA029_01179	105583_PA031_00085	105584_PA032_00067	105585_PA033_00641	105586_PA034_00164	105587_PA040_00070	105590_PA048_00585	105593_PA061_00843	105594_PA062_00099	105597_PA065_01450	105601_PA070_00716	105614_PA093_00065	105616_PV004_00838	105636_PV086_00528	105640_PV091_00245	105642_PV093_00921	105746_cerdo_0_1_C1_00555	105747_cerdo_0_1_C2_00628	108479_3070_00298	108481_3072_00026	108483_3074_00011	108486_3077_00227	108491_3082_00073	108492_3083_00651	108494_3085_00486	108498_3089_00012	108504_3095_00477	108508_3099_00047	108524_3325_00931	108528_3330_00090	108546_3348_01222	112371_CAM000139_1663_00605
g02136_00005__g02136	rsxB	Ion-translocating oxidoreductase complex subunit B	460	0	1	5	4	NA	NA		rsxB(460)	312	324	105577_PA010_00226	105578_PA017_00303	105579_PA026_00720	105580_PA028_00590	105581_PA029_01180	105583_PA031_00086	105584_PA032_00066	105585_PA033_00642	105586_PA034_00163	105587_PA040_00069	105590_PA048_00586	105593_PA061_00844	105594_PA062_00100	105597_PA065_01451	105601_PA070_00717	105614_PA093_00064	105616_PV004_00839	105636_PV086_00529	105640_PV091_00244	105642_PV093_00920	105746_cerdo_0_1_C1_00556	105747_cerdo_0_1_C2_00627	108479_3070_00299	108481_3072_00025	108483_3074_00010	108486_3077_00226	108491_3082_00074	108492_3083_00652	108494_3085_00485	108498_3089_00011	108504_3095_00476	108508_3099_00046	108524_3325_00930	108528_3330_00089	108546_3348_01221	112371_CAM000139_1663_00604
g01517_1_00006__g01517_1	korA	2-oxoglutarate oxidoreductase subunit KorA	460	0	1	5	5	NA	NA		korA(456):NA(5)	321	1125	105577_PA010_00227	105578_PA017_00302	105579_PA026_00721	105580_PA028_00591	105581_PA029_01181	105583_PA031_00087	105584_PA032_00065	105585_PA033_00643	105586_PA034_00162	105587_PA040_00068	105590_PA048_00587	105593_PA061_00845	105594_PA062_00101	105597_PA065_01452	105601_PA070_00718	105614_PA093_00063	105616_PV004_00840	105636_PV086_00530	105640_PV091_00243	105642_PV093_00919	105746_cerdo_0_1_C1_00557	105747_cerdo_0_1_C2_00626	108479_3070_00300	108481_3072_00024	108483_3074_00009	108486_3077_00225	108491_3082_00075	108492_3083_00653	108494_3085_00484	108498_3089_00010	108504_3095_00475	108508_3099_00045	108524_3325_00929	108528_3330_00088	108546_3348_01220	112371_CAM000139_1663_00603
g01939_00005__g01939	NA	hypothetical protein	460	0	1	5	6	NA	NA		NA(460)	846	846	105577_PA010_00228	105578_PA017_00301	105579_PA026_00722	105580_PA028_00592	105581_PA029_01182	105583_PA031_00088	105584_PA032_00064	105585_PA033_00644	105586_PA034_00161	105587_PA040_00067	105590_PA048_00588	105593_PA061_00846	105594_PA062_00102	105597_PA065_01453	105601_PA070_00719	105614_PA093_00062	105616_PV004_00841	105636_PV086_00531	105640_PV091_00242	105642_PV093_00918	105746_cerdo_0_1_C1_00558	105747_cerdo_0_1_C2_00625	108479_3070_00301	108481_3072_00023	108483_3074_00008	108486_3077_00224	108491_3082_00076	108492_3083_00654	108494_3085_00483	108498_3089_00009	108504_3095_00474	108508_3099_00044	108524_3325_00928	108528_3330_00087	108546_3348_01219	112371_CAM000139_1663_00602
g00052_00006__g00052	hydA	Quinone-reactive Ni/Fe-hydrogenase small chain	460	0	1	6	1	NA	NA		hydA(460)	165	1140	105577_PA010_01455	105578_PA017_00264	105579_PA026_01144	105580_PA028_00451	105581_PA029_00708	105583_PA031_01012	105584_PA032_00028	105585_PA033_00881	105586_PA034_00125	105587_PA040_00026	105590_PA048_00456	105593_PA061_01018	105594_PA062_01116	105597_PA065_00302	105601_PA070_01431	105614_PA093_00025	105616_PV004_00124	105636_PV086_00713	105640_PV091_00205	105642_PV093_00881	105746_cerdo_0_1_C1_00596	105747_cerdo_0_1_C2_00587	108479_3070_00338	108481_3072_00546	108483_3074_00199	108486_3077_00421	108491_3082_00025	108492_3083_00029	108494_3085_00529	108498_3089_00795	108504_3095_00054	108508_3099_00007	108524_3325_00263	108528_3330_00904	108546_3348_00401	112371_CAM000139_1663_00565
g01148_1_00006__g01148_1	hydB	Quinone-reactive Ni/Fe-hydrogenase large chain	460	0	1	6	2	NA	NA		hydB(460)	504	1716	105577_PA010_01454	105578_PA017_00263	105579_PA026_01143	105580_PA028_00450	105581_PA029_00707	105583_PA031_01011	105584_PA032_00027	105585_PA033_00880	105586_PA034_00124	105587_PA040_00025	105590_PA048_00455	105593_PA061_01017	105594_PA062_01115	105597_PA065_00301	105601_PA070_01430	105614_PA093_00024	105616_PV004_00123	105636_PV086_00712	105640_PV091_00204	105642_PV093_00880	105746_cerdo_0_1_C1_00597	105747_cerdo_0_1_C2_00586	108479_3070_00339	108481_3072_00547	108483_3074_00200	108486_3077_00422	108491_3082_00024	108492_3083_00030	108494_3085_00528	108498_3089_00796	108504_3095_00055	108508_3099_00006	108524_3325_00262	108528_3330_00905	108546_3348_00400	112371_CAM000139_1663_00564
g01314_1_00006__g01314_1	hydC	Quinone-reactive Ni/Fe-hydrogenase B-type cytochrome subunit	460	0	1	6	3	NA	NA		hydC(460)	273	693	105577_PA010_01453	105578_PA017_00262	105579_PA026_01142	105580_PA028_00449	105581_PA029_00706	105583_PA031_01010	105584_PA032_00026	105585_PA033_00879	105586_PA034_00123	105587_PA040_00024	105590_PA048_00454	105593_PA061_01016	105594_PA062_01114	105597_PA065_00300	105601_PA070_01429	105614_PA093_00023	105616_PV004_00122	105636_PV086_00711	105640_PV091_00203	105642_PV093_00879	105746_cerdo_0_1_C1_00598	105747_cerdo_0_1_C2_00585	108479_3070_00340	108481_3072_00548	108483_3074_00201	108486_3077_00423	108491_3082_00023	108492_3083_00031	108494_3085_00527	108498_3089_00797	108504_3095_00056	108508_3099_00005	108524_3325_00261	108528_3330_00906	108546_3348_00399	112371_CAM000139_1663_00563
g01069_00005__g01069	NA	hypothetical protein	460	0	1	6	4	NA	NA		NA(460)	501	534	105577_PA010_01452	105578_PA017_00261	105579_PA026_01141	105580_PA028_00448	105581_PA029_00705	105583_PA031_01009	105584_PA032_00025	105585_PA033_00878	105586_PA034_00122	105587_PA040_00023	105590_PA048_00453	105593_PA061_01015	105594_PA062_01113	105597_PA065_00299	105601_PA070_01428	105614_PA093_00022	105616_PV004_00121	105636_PV086_00710	105640_PV091_00202	105642_PV093_00878	105746_cerdo_0_1_C1_00599	105747_cerdo_0_1_C2_00584	108479_3070_00341	108481_3072_00549	108483_3074_00202	108486_3077_00424	108491_3082_00022	108492_3083_00032	108494_3085_00526	108498_3089_00798	108504_3095_00057	108508_3099_00004	108524_3325_00260	108528_3330_00907	108546_3348_00398	112371_CAM000139_1663_00562
g01650_00005__g01650	recR	Recombination protein RecR	460	0	1	6	5	NA	NA		recR(460)	576	576	105577_PA010_01451	105578_PA017_00260	105579_PA026_01140	105580_PA028_00447	105581_PA029_00704	105583_PA031_01008	105584_PA032_00024	105585_PA033_00877	105586_PA034_00121	105587_PA040_00022	105590_PA048_00452	105593_PA061_01014	105594_PA062_01112	105597_PA065_00298	105601_PA070_01427	105614_PA093_00021	105616_PV004_00120	105636_PV086_00709	105640_PV091_00201	105642_PV093_00877	105746_cerdo_0_1_C1_00600	105747_cerdo_0_1_C2_00583	108479_3070_00342	108481_3072_00550	108483_3074_00203	108486_3077_00425	108491_3082_00021	108492_3083_00033	108494_3085_00525	108498_3089_00799	108504_3095_00058	108508_3099_00003	108524_3325_00259	108528_3330_00908	108546_3348_00397	112371_CAM000139_1663_00561
g00930_00003__g00930	czcS	Sensor protein CzcS	460	0	1	6	6	NA	NA		czcS(443):NA(18)	375	1251	105577_PA010_01450	105578_PA017_00259	105579_PA026_01139	105580_PA028_00446	105581_PA029_00703	105583_PA031_01007	105584_PA032_00023	105585_PA033_00876	105586_PA034_00120	105587_PA040_00021	105590_PA048_00451	105593_PA061_01013	105594_PA062_01111	105597_PA065_00297	105601_PA070_01426	105614_PA093_00020	105616_PV004_00119	105636_PV086_00708	105640_PV091_00200	105642_PV093_00876;105642_PV093_01840	105746_cerdo_0_1_C1_00601	105747_cerdo_0_1_C2_00582	108479_3070_00343	108481_3072_00551	108483_3074_00204	108486_3077_00426	108491_3082_00020	108492_3083_00034	108494_3085_00524	108498_3089_00800	108504_3095_00059	108508_3099_00002	108524_3325_00258	108528_3330_00909	108546_3348_00396	112371_CAM000139_1663_00560
g00613_1_00004__g00613_1	glmS	Glutamine--fructose-6-phosphate aminotransferase [isomerizing]	460	0	1	7	1	NA	NA		glmS(461)	156	1797	105577_PA010_00594	105578_PA017_01197	105579_PA026_00661	105580_PA028_01548	105581_PA029_01545	105583_PA031_00501	105584_PA032_00565	105585_PA033_00802	105586_PA034_01109	105587_PA040_01338	105590_PA048_01225	105593_PA061_00318	105594_PA062_00361	105597_PA065_01507	105601_PA070_00436	105614_PA093_00967	105616_PV004_01385	105636_PV086_01198	105640_PV091_01132	105642_PV093_00460	105746_cerdo_0_1_C1_01279	105747_cerdo_0_1_C2_01256	108479_3070_01504	108481_3072_01130	108483_3074_00270	108486_3077_01242	108491_3082_01107	108492_3083_00064	108494_3085_00879	108498_3089_00237	108504_3095_01071	108508_3099_01008	108524_3325_00158	108528_3330_01163	108546_3348_00525	112371_CAM000139_1663_00880
g00068_00006__g00068	fumC	Fumarate hydratase class II	460	0	1	7	2	NA	NA		fumC(460)	435	1392	105577_PA010_00595	105578_PA017_01198	105579_PA026_00662	105580_PA028_01549	105581_PA029_01546	105583_PA031_00499	105584_PA032_00564	105585_PA033_01397	105586_PA034_01110	105587_PA040_01336	105590_PA048_01226	105593_PA061_00319	105594_PA062_00362	105597_PA065_01508	105601_PA070_00437	105614_PA093_00968	105616_PV004_01386	105636_PV086_01199	105640_PV091_01131	105642_PV093_00461	105746_cerdo_0_1_C1_01277	105747_cerdo_0_1_C2_01254	108479_3070_01503	108481_3072_01131	108483_3074_00271	108486_3077_01243	108491_3082_01108	108492_3083_00063	108494_3085_00878	108498_3089_00238	108504_3095_01072	108508_3099_01009	108524_3325_00157	108528_3330_01170	108546_3348_00524	112371_CAM000139_1663_00881
g00968_00003__g00968	NA	hypothetical protein	460	0	1	7	3	NA	NA		NA(461)	393	1044	105577_PA010_00596	105578_PA017_01199	105579_PA026_00663	105580_PA028_01550	105581_PA029_01547	105583_PA031_00498	105584_PA032_00563	105585_PA033_01396	105586_PA034_01111	105587_PA040_01335	105590_PA048_01227	105593_PA061_00320	105594_PA062_00363	105597_PA065_01509	105601_PA070_00438	105614_PA093_00969	105616_PV004_01387	105636_PV086_01200	105640_PV091_01130	105642_PV093_00462	105746_cerdo_0_1_C1_01276	105747_cerdo_0_1_C2_01253	108479_3070_01502	108481_3072_01132	108483_3074_00272	108486_3077_01244	108491_3082_01109	108492_3083_00062	108494_3085_00877	108498_3089_00239	108504_3095_01073	108508_3099_01010	108524_3325_00156	108528_3330_01169	108546_3348_00523	112371_CAM000139_1663_00882
g01214_00004__g01214	ruvB	Holliday junction ATP-dependent DNA helicase RuvB	460	0	1	7	4	NA	NA		ruvB(462)	156	1011	105577_PA010_00597	105578_PA017_01200	105579_PA026_00664	105580_PA028_01551	105581_PA029_01548	105583_PA031_01381	105584_PA032_00562	105585_PA033_01395	105586_PA034_01112	105587_PA040_01334	105590_PA048_01228	105593_PA061_00321	105594_PA062_00364	105597_PA065_01510	105601_PA070_00439	105614_PA093_00970	105616_PV004_01388	105636_PV086_01201	105640_PV091_01129	105642_PV093_00463	105746_cerdo_0_1_C1_01275	105747_cerdo_0_1_C2_01252	108479_3070_01501	108481_3072_01133	108483_3074_00273	108486_3077_01245	108491_3082_01110	108492_3083_00061	108494_3085_00876	108498_3089_00240	108504_3095_01074	108508_3099_01011	108524_3325_00155	108528_3330_01168	108546_3348_00522	112371_CAM000139_1663_00883
g02074_00005__g02074	NA	hypothetical protein	460	0	1	7	5	NA	NA		NA(460)	174	453	105577_PA010_00598	105578_PA017_01201	105579_PA026_00665	105580_PA028_01552	105581_PA029_01549	105583_PA031_01380	105584_PA032_00561	105585_PA033_01394	105586_PA034_01113	105587_PA040_01333	105590_PA048_01229	105593_PA061_00322	105594_PA062_00365	105597_PA065_01511	105601_PA070_00440	105614_PA093_00971	105616_PV004_01389	105636_PV086_01202	105640_PV091_01128	105642_PV093_00464	105746_cerdo_0_1_C1_01274	105747_cerdo_0_1_C2_01251	108479_3070_01500	108481_3072_01134	108483_3074_00274	108486_3077_01246	108491_3082_01111	108492_3083_00060	108494_3085_01500	108498_3089_00241	108504_3095_01075	108508_3099_01012	108524_3325_00154	108528_3330_01167	108546_3348_00521	112371_CAM000139_1663_00884
g01589_00003__g01589	murB	UDP-N-acetylenolpyruvoylglucosamine reductase	460	0	1	8	1	NA	NA		murB(460)	336	777	105577_PA010_00082	105578_PA017_00816	105579_PA026_00366	105580_PA028_00857	105581_PA029_00082	105583_PA031_00440	105584_PA032_00431	105585_PA033_00082	105586_PA034_00514	105587_PA040_01196	105590_PA048_00715	105593_PA061_00082	105594_PA062_00255	105597_PA065_00565	105601_PA070_00844	105614_PA093_00860	105616_PV004_00636	105636_PV086_01093	105640_PV091_00984	105642_PV093_00796	105746_cerdo_0_1_C1_01181	105747_cerdo_0_1_C2_01158	108479_3070_00396	108481_3072_01429	108483_3074_00310	108486_3077_00030	108491_3082_00135	108492_3083_00670	108494_3085_00008	108498_3089_00281	108504_3095_00742	108508_3099_00288	108524_3325_01198	108528_3330_00497	108546_3348_00340	112371_CAM000139_1663_01285
g02154_00005__g02154	fliQ	Flagellar biosynthetic protein FliQ	460	0	1	8	2	NA	NA		fliQ(460)	270	270	105577_PA010_00083	105578_PA017_00817	105579_PA026_00367	105580_PA028_00858	105581_PA029_00083	105583_PA031_00441	105584_PA032_00432	105585_PA033_00083	105586_PA034_00515	105587_PA040_01197	105590_PA048_00716	105593_PA061_00083	105594_PA062_00256	105597_PA065_00566	105601_PA070_00845	105614_PA093_00861	105616_PV004_00637	105636_PV086_01094	105640_PV091_00985	105642_PV093_00797	105746_cerdo_0_1_C1_01182	105747_cerdo_0_1_C2_01159	108479_3070_00395	108481_3072_01428	108483_3074_00311	108486_3077_00031	108491_3082_00134	108492_3083_00671	108494_3085_00007	108498_3089_00282	108504_3095_00743	108508_3099_00287	108524_3325_01199	108528_3330_00498	108546_3348_00339	112371_CAM000139_1663_01284
g01272_00003__g01272	mqnD	1%2C4-dihydroxy-6-naphtoate synthase	460	0	1	8	3	NA	NA		mqnD(460)	861	864	105577_PA010_00084	105578_PA017_00818	105579_PA026_00368	105580_PA028_00859	105581_PA029_00084	105583_PA031_00442	105584_PA032_00433	105585_PA033_00084	105586_PA034_00516	105587_PA040_01198	105590_PA048_00717	105593_PA061_00084	105594_PA062_00257	105597_PA065_00567	105601_PA070_00846	105614_PA093_00862	105616_PV004_00638	105636_PV086_01095	105640_PV091_00986	105642_PV093_00798	105746_cerdo_0_1_C1_01183	105747_cerdo_0_1_C2_01160	108479_3070_00394	108481_3072_01427	108483_3074_00312	108486_3077_00032	108491_3082_00133	108492_3083_00672	108494_3085_00006	108498_3089_00283	108504_3095_00744	108508_3099_00286	108524_3325_01200	108528_3330_00499	108546_3348_00338	112371_CAM000139_1663_01283
g01245_1_00007__g01245_1	recA	Protein RecA	460	0	1	8	4	NA	NA		recA(460)	807	1035	105577_PA010_00085	105578_PA017_00819	105579_PA026_00369	105580_PA028_00860	105581_PA029_00085	105583_PA031_00443	105584_PA032_00434	105585_PA033_00085	105586_PA034_00517	105587_PA040_01199	105590_PA048_00718	105593_PA061_00085	105594_PA062_00258	105597_PA065_00568	105601_PA070_00847	105614_PA093_00863	105616_PV004_00639	105636_PV086_01096	105640_PV091_00987	105642_PV093_00799	105746_cerdo_0_1_C1_01184	105747_cerdo_0_1_C2_01161	108479_3070_00393	108481_3072_01426	108483_3074_00313	108486_3077_00033	108491_3082_00132	108492_3083_00673	108494_3085_00005	108498_3089_00284	108504_3095_00745	108508_3099_00285	108524_3325_01201	108528_3330_00500	108546_3348_00337	112371_CAM000139_1663_01282
g01825_00005__g01825	eno	Enolase	460	0	1	8	5	NA	NA		eno(460)	1245	1245	105577_PA010_00086	105578_PA017_00820	105579_PA026_00370	105580_PA028_00861	105581_PA029_00086	105583_PA031_00444	105584_PA032_00435	105585_PA033_00086	105586_PA034_00518	105587_PA040_01200	105590_PA048_00719	105593_PA061_00086	105594_PA062_00259	105597_PA065_00569	105601_PA070_00848	105614_PA093_00864	105616_PV004_00640	105636_PV086_01097	105640_PV091_00988	105642_PV093_00800	105746_cerdo_0_1_C1_01185	105747_cerdo_0_1_C2_01162	108479_3070_00392	108481_3072_01425	108483_3074_00314	108486_3077_00034	108491_3082_00131	108492_3083_00674	108494_3085_00004	108498_3089_00285	108504_3095_00746	108508_3099_00284	108524_3325_01202	108528_3330_00501	108546_3348_00336	112371_CAM000139_1663_01281
g00070_00006__g00070	rplU	50S ribosomal protein L21	460	0	1	9	1	NA	NA		rplU(460)	309	309	105577_PA010_00462	105578_PA017_00701	105579_PA026_00991	105580_PA028_00707	105581_PA029_01006	105583_PA031_00711	105584_PA032_01092	105585_PA033_01336	105586_PA034_00359	105587_PA040_00885	105590_PA048_01262	105593_PA061_00961	105594_PA062_01003	105597_PA065_00738	105601_PA070_01023	105614_PA093_00275	105616_PV004_00345	105636_PV086_00850	105640_PV091_00471	105642_PV093_00978	105746_cerdo_0_1_C1_00784	105747_cerdo_0_1_C2_01043	108479_3070_01422	108481_3072_01413	108483_3074_00644	108486_3077_00504	108491_3082_01083	108492_3083_00815	108494_3085_00497	108498_3089_00610	108504_3095_01008	108508_3099_00088	108524_3325_00846	108528_3330_00751	108546_3348_01348	112371_CAM000139_1663_01111
g00047_00006__g00047	rpmA	50S ribosomal protein L27	460	0	1	9	2	NA	NA		rpmA(460)	255	255	105577_PA010_00461	105578_PA017_00700	105579_PA026_00990	105580_PA028_00706	105581_PA029_01007	105583_PA031_00710	105584_PA032_01093	105585_PA033_01335	105586_PA034_00358	105587_PA040_00884	105590_PA048_01261	105593_PA061_00960	105594_PA062_01004	105597_PA065_00737	105601_PA070_01022	105614_PA093_00274	105616_PV004_00344	105636_PV086_00849	105640_PV091_00470	105642_PV093_00977	105746_cerdo_0_1_C1_00785	105747_cerdo_0_1_C2_01042	108479_3070_01423	108481_3072_01414	108483_3074_00643	108486_3077_00505	108491_3082_01082	108492_3083_00816	108494_3085_00498	108498_3089_00609	108504_3095_01007	108508_3099_00089	108524_3325_00845	108528_3330_00750	108546_3348_01347	112371_CAM000139_1663_01112
g00267_1_00004__g00267_1	obg	GTPase Obg	460	0	1	9	3	NA	NA		obg(458):NA(453)	147	1143	105577_PA010_00460;105577_PA010_00908	105578_PA017_00049;105578_PA017_00699	105579_PA026_00094;105579_PA026_00989	105580_PA028_00094;105580_PA028_00705	105581_PA029_01008;105581_PA029_01761	105583_PA031_00709;105583_PA031_01129	105584_PA032_00733;105584_PA032_01094	105585_PA033_01297;105585_PA033_01334	105586_PA034_00357;105586_PA034_00637	105587_PA040_00883;105587_PA040_01410	105590_PA048_00094;105590_PA048_01260	105593_PA061_00959;105593_PA061_01247	105594_PA062_01005;105594_PA062_01340	105597_PA065_00736;105597_PA065_01127	105601_PA070_00074;105601_PA070_01021	105614_PA093_00273;105614_PA093_00785	105616_PV004_00343;105616_PV004_00520	105636_PV086_00242;105636_PV086_00848	105640_PV091_00469;105640_PV091_00943	105642_PV093_00231;105642_PV093_00976	105746_cerdo_0_1_C1_00209;105746_cerdo_0_1_C1_00786	105747_cerdo_0_1_C2_00246;105747_cerdo_0_1_C2_01041	108479_3070_01424;108479_3070_01453	108481_3072_01267;108481_3072_01415	108483_3074_00642;108483_3074_01646	108486_3077_00101;108486_3077_00506	108491_3082_01081	108492_3083_00817;108492_3083_01252	108494_3085_00128;108494_3085_00499	108498_3089_00608;108498_3089_00657	108504_3095_00040;108504_3095_01006	108508_3099_00090;108508_3099_00869	108524_3325_00844;108524_3325_01416	108528_3330_00100;108528_3330_00749	108546_3348_00828	112371_CAM000139_1663_00202;112371_CAM000139_1663_01113
g00838_00005__g00838	NA	hypothetical protein	460	0	1	9	4	NA	NA		NA(461)	240	804	105577_PA010_00909	105578_PA017_00048	105579_PA026_00095	105580_PA028_00095	105581_PA029_01762	105583_PA031_01128	105584_PA032_00732	105585_PA033_01296	105586_PA034_00638	105587_PA040_01409	105590_PA048_00095	105593_PA061_01248	105594_PA062_01339	105597_PA065_01128	105601_PA070_00073	105614_PA093_00786	105616_PV004_00521	105636_PV086_00241	105640_PV091_00942	105642_PV093_00232	105746_cerdo_0_1_C1_00210	105747_cerdo_0_1_C2_00245	108479_3070_01452	108481_3072_01268	108483_3074_01645	108486_3077_00102	108491_3082_00377	108492_3083_01253	108494_3085_00127	108498_3089_00656	108504_3095_00039	108508_3099_00870	108524_3325_01415	108528_3330_00101	108546_3348_00827	112371_CAM000139_1663_00203
g00067_00006__g00067	thiG	Thiazole synthase	460	0	1	9	5	NA	NA		thiG(460)	777	777	105577_PA010_00910	105578_PA017_00047	105579_PA026_00096	105580_PA028_00096	105581_PA029_01763	105583_PA031_01127	105584_PA032_00731	105585_PA033_01295	105586_PA034_00639	105587_PA040_01408	105590_PA048_00096	105593_PA061_01249	105594_PA062_01338	105597_PA065_01129	105601_PA070_00072	105614_PA093_00787	105616_PV004_00522	105636_PV086_00240	105640_PV091_00941	105642_PV093_00233	105746_cerdo_0_1_C1_00211	105747_cerdo_0_1_C2_00244	108479_3070_01451	108481_3072_01269	108483_3074_01644	108486_3077_00103	108491_3082_00376	108492_3083_01254	108494_3085_00126	108498_3089_00655	108504_3095_00038	108508_3099_00871	108524_3325_01414	108528_3330_00102	108546_3348_00826	112371_CAM000139_1663_00204
g00773_1_00005__g00773_1	gltA	Citrate synthase	460	0	1	10	1	NA	NA		gltA(460)	1269	1269	105577_PA010_00078	105578_PA017_00812	105579_PA026_00362	105580_PA028_00853	105581_PA029_00078	105583_PA031_00436	105584_PA032_00427	105585_PA033_00078	105586_PA034_00510	105587_PA040_01192	105590_PA048_00711	105593_PA061_00078	105594_PA062_00251	105597_PA065_00561	105601_PA070_00840	105614_PA093_00856	105616_PV004_00632	105636_PV086_01089	105640_PV091_00980	105642_PV093_00792	105746_cerdo_0_1_C1_01177	105747_cerdo_0_1_C2_01154	108479_3070_00400	108481_3072_01433	108483_3074_00306	108486_3077_00026	108491_3082_00340	108492_3083_00666	108494_3085_00012	108498_3089_00277	108504_3095_01200	108508_3099_00292	108524_3325_00367	108528_3330_00245	108546_3348_00344	112371_CAM000139_1663_01289
g01226_00004__g01226	NA	hypothetical protein	460	0	1	10	2	NA	NA		NA(460)	249	1176	105577_PA010_00077	105578_PA017_00811	105579_PA026_00361	105580_PA028_00852	105581_PA029_00077	105583_PA031_00435	105584_PA032_00426	105585_PA033_00077	105586_PA034_00509	105587_PA040_01191	105590_PA048_00710	105593_PA061_00077	105594_PA062_00250	105597_PA065_00560	105601_PA070_00839	105614_PA093_00855	105616_PV004_00631	105636_PV086_01088	105640_PV091_00979	105642_PV093_00791	105746_cerdo_0_1_C1_01176	105747_cerdo_0_1_C2_01153	108479_3070_00401	108481_3072_01434	108483_3074_00305	108486_3077_00025	108491_3082_00339	108492_3083_00665	108494_3085_00013	108498_3089_00276	108504_3095_01201	108508_3099_00293	108524_3325_00368	108528_3330_00246	108546_3348_00345	112371_CAM000139_1663_01290
g01280_00005__g01280	bioB	Biotin synthase	460	0	1	10	3	NA	NA		bioB(461)	255	837	105577_PA010_00076	105578_PA017_00810	105579_PA026_00360	105580_PA028_00851	105581_PA029_00076	105583_PA031_00434	105584_PA032_00425	105585_PA033_00076	105586_PA034_00508	105587_PA040_01190	105590_PA048_00709	105593_PA061_00076	105594_PA062_00249	105597_PA065_00559	105601_PA070_00838	105614_PA093_00854	105616_PV004_00630	105636_PV086_01087	105640_PV091_00978	105642_PV093_00790	105746_cerdo_0_1_C1_01175	105747_cerdo_0_1_C2_01152	108479_3070_00402	108481_3072_01435	108483_3074_00304	108486_3077_00024	108491_3082_00338	108492_3083_00664	108494_3085_00014	108498_3089_00275	108504_3095_01202	108508_3099_00294	108524_3325_00369	108528_3330_00247	108546_3348_00346	112371_CAM000139_1663_01291
g00781_00005__g00781	topA	DNA topoisomerase 1	460	0	1	10	4	NA	NA		topA(460)	954	2103	105577_PA010_00075	105578_PA017_00809	105579_PA026_00359	105580_PA028_00850	105581_PA029_00075	105583_PA031_00433	105584_PA032_00424	105585_PA033_00075	105586_PA034_00507	105587_PA040_01189	105590_PA048_00708	105593_PA061_00075	105594_PA062_00248	105597_PA065_00558	105601_PA070_00837	105614_PA093_00853	105616_PV004_00629	105636_PV086_01086	105640_PV091_00977	105642_PV093_00789	105746_cerdo_0_1_C1_01174	105747_cerdo_0_1_C2_01151	108479_3070_00403	108481_3072_01436	108483_3074_00303	108486_3077_00023	108491_3082_00337	108492_3083_00663	108494_3085_00015	108498_3089_00274	108504_3095_01203	108508_3099_00295	108524_3325_00370	108528_3330_00248	108546_3348_00347	112371_CAM000139_1663_01292
g00771_00003__g00771	NA	hypothetical protein	460	0	1	10	5	NA	NA		NA(475)	414	1272	105577_PA010_00074	105578_PA017_00808	105579_PA026_00358	105580_PA028_00849	105581_PA029_00074	105583_PA031_00432	105584_PA032_00423	105585_PA033_00074	105586_PA034_00506	105587_PA040_01188	105590_PA048_00707	105593_PA061_00074	105594_PA062_00247	105597_PA065_00557	105601_PA070_00836	105614_PA093_00852	105616_PV004_00628	105636_PV086_01085	105640_PV091_00976	105642_PV093_00788	105746_cerdo_0_1_C1_01173	105747_cerdo_0_1_C2_01150	108479_3070_00404	108481_3072_00949	108483_3074_00302	108486_3077_00022	108491_3082_00336	108492_3083_00560	108494_3085_00016	108498_3089_00273	108504_3095_00660	108508_3099_00296	108524_3325_00371	108528_3330_00249	108546_3348_00147	112371_CAM000139_1663_01293
g00027_00006__g00027	infA	Translation initiation factor IF-1	460	0	1	11	1	NA	NA		infA(460)	204	219	105577_PA010_00373	105578_PA017_00613	105579_PA026_01224	105580_PA028_00619	105581_PA029_00654	105583_PA031_01251	105584_PA032_01125	105585_PA033_01031	105586_PA034_00272	105587_PA040_01084	105590_PA048_01034	105593_PA061_00572	105594_PA062_01812	105597_PA065_00651	105601_PA070_00936	105614_PA093_00188	105616_PV004_00176	105636_PV086_00762	105640_PV091_00384	105642_PV093_01455	105746_cerdo_0_1_C1_00877	105747_cerdo_0_1_C2_00950	108479_3070_00200	108481_3072_00266	108483_3074_00575	108486_3077_01422	108491_3082_00587	108492_3083_01408	108494_3085_01150	108498_3089_00152	108504_3095_00212	108508_3099_00356	108524_3325_00521	108528_3330_00937	108546_3348_01181	112371_CAM000139_1663_01198
g00062_00006__g00062	rpsM	30S ribosomal protein S13	460	0	1	11	2	NA	NA		rpsM(460)	366	366	105577_PA010_00374	105578_PA017_00614	105579_PA026_01225	105580_PA028_00620	105581_PA029_00655	105583_PA031_01252	105584_PA032_01126	105585_PA033_01032	105586_PA034_00273	105587_PA040_01085	105590_PA048_01035	105593_PA061_00573	105594_PA062_01813	105597_PA065_00652	105601_PA070_00937	105614_PA093_00189	105616_PV004_00177	105636_PV086_00763	105640_PV091_00385	105642_PV093_01456	105746_cerdo_0_1_C1_00876	105747_cerdo_0_1_C2_00951	108479_3070_00201	108481_3072_00265	108483_3074_00574	108486_3077_01423	108491_3082_00586	108492_3083_01407	108494_3085_01149	108498_3089_00151	108504_3095_00213	108508_3099_00357	108524_3325_00520	108528_3330_00936	108546_3348_01180	112371_CAM000139_1663_01197
g00055_00006__g00055	rpsK	30S ribosomal protein S11	460	0	1	11	3	NA	NA		rpsK(460)	303	393	105577_PA010_00375	105578_PA017_00615	105579_PA026_01226	105580_PA028_00621	105581_PA029_00656	105583_PA031_01253	105584_PA032_01127	105585_PA033_01033	105586_PA034_00274	105587_PA040_01086	105590_PA048_01036	105593_PA061_00574	105594_PA062_01814	105597_PA065_00653	105601_PA070_00938	105614_PA093_00190	105616_PV004_00178	105636_PV086_00764	105640_PV091_00386	105642_PV093_01457	105746_cerdo_0_1_C1_00875	105747_cerdo_0_1_C2_00952	108479_3070_00202	108481_3072_00264	108483_3074_00573	108486_3077_01424	108491_3082_00585	108492_3083_01406	108494_3085_01148	108498_3089_00150	108504_3095_00214	108508_3099_00358	108524_3325_00519	108528_3330_00935	108546_3348_01179	112371_CAM000139_1663_01196
g00038_00006__g00038	rpsD	30S ribosomal protein S4	460	0	1	11	4	NA	NA		rpsD(460)	627	627	105577_PA010_00376	105578_PA017_00616	105579_PA026_01227	105580_PA028_00622	105581_PA029_00657	105583_PA031_01254	105584_PA032_01128	105585_PA033_01034	105586_PA034_00275	105587_PA040_01087	105590_PA048_01037	105593_PA061_00575	105594_PA062_01815	105597_PA065_00654	105601_PA070_00939	105614_PA093_00191	105616_PV004_00179	105636_PV086_00765	105640_PV091_00387	105642_PV093_01458	105746_cerdo_0_1_C1_00874	105747_cerdo_0_1_C2_00953	108479_3070_00203	108481_3072_00263	108483_3074_00572	108486_3077_01425	108491_3082_00584	108492_3083_01405	108494_3085_01147	108498_3089_00149	108504_3095_00215	108508_3099_00359	108524_3325_00518	108528_3330_00934	108546_3348_01178	112371_CAM000139_1663_01195
g01891_00005__g01891	rpoA	DNA-directed RNA polymerase subunit alpha	460	0	1	11	5	NA	NA		rpoA(460)	1014	1014	105577_PA010_00377	105578_PA017_00617	105579_PA026_01228	105580_PA028_00623	105581_PA029_00658	105583_PA031_01255	105584_PA032_01129	105585_PA033_01035	105586_PA034_00276	105587_PA040_01088	105590_PA048_01038	105593_PA061_00576	105594_PA062_01816	105597_PA065_00655	105601_PA070_00940	105614_PA093_00192	105616_PV004_00180	105636_PV086_00766	105640_PV091_00388	105642_PV093_01459	105746_cerdo_0_1_C1_00873	105747_cerdo_0_1_C2_00954	108479_3070_00204	108481_3072_00262	108483_3074_00571	108486_3077_01426	108491_3082_00583	108492_3083_01404	108494_3085_01146	108498_3089_00148	108504_3095_00216	108508_3099_00360	108524_3325_00517	108528_3330_00933	108546_3348_01177	112371_CAM000139_1663_01194
g00020_00006__g00020	rplM	50S ribosomal protein L13	460	0	1	12	1	NA	NA		rplM(460)	270	426	105577_PA010_00511	105578_PA017_00962	105579_PA026_00470	105580_PA028_01008	105581_PA029_00600	105583_PA031_01299	105584_PA032_00303	105585_PA033_00713	105586_PA034_00441	105587_PA040_00619	105590_PA048_00838	105593_PA061_00673	105594_PA062_00419	105597_PA065_00391	105601_PA070_00342	105614_PA093_00639	105616_PV004_01302	105636_PV086_00971	105640_PV091_00689	105642_PV093_00723	105746_cerdo_0_1_C1_01372	105747_cerdo_0_1_C2_01349	108479_3070_00740	108481_3072_00507	108483_3074_00906	108486_3077_00354	108491_3082_00488	108492_3083_00960	108494_3085_00595	108498_3089_01018	108504_3095_00678	108508_3099_00614	108524_3325_00768	108528_3330_00690	108546_3348_01025	112371_CAM000139_1663_00788
g00005_00006__g00005	rpsI	30S ribosomal protein S9	460	0	1	12	2	NA	NA		rpsI(460)	213	390	105577_PA010_00512	105578_PA017_00963	105579_PA026_00471	105580_PA028_01009	105581_PA029_00601	105583_PA031_01298	105584_PA032_00304	105585_PA033_00714	105586_PA034_00442	105587_PA040_00620	105590_PA048_00839	105593_PA061_00674	105594_PA062_00420	105597_PA065_00392	105601_PA070_00343	105614_PA093_00640	105616_PV004_01303	105636_PV086_00972	105640_PV091_00688	105642_PV093_00724	105746_cerdo_0_1_C1_01371	105747_cerdo_0_1_C2_01348	108479_3070_00739	108481_3072_00506	108483_3074_00905	108486_3077_00353	108491_3082_00487	108492_3083_00959	108494_3085_00596	108498_3089_01019	108504_3095_00679	108508_3099_00615	108524_3325_00767	108528_3330_00691	108546_3348_01024	112371_CAM000139_1663_00789
g00977_00003__g00977	oprF	Outer membrane porin F	460	0	1	12	3	NA	NA		oprF(461)	363	999	105577_PA010_00513	105578_PA017_00964	105579_PA026_00472	105580_PA028_01010	105581_PA029_00602	105583_PA031_01297	105584_PA032_00305	105585_PA033_00715	105586_PA034_00443	105587_PA040_00621	105590_PA048_00840	105593_PA061_00675	105594_PA062_00421	105597_PA065_00393	105601_PA070_00344	105614_PA093_00641	105616_PV004_01304	105636_PV086_00973	105640_PV091_00687	105642_PV093_00725	105746_cerdo_0_1_C1_01370	105747_cerdo_0_1_C2_01347	108479_3070_00738	108481_3072_00505	108483_3074_00904	108486_3077_00352	108491_3082_00486	108492_3083_00958	108494_3085_00597	108498_3089_01020	108504_3095_00680	108508_3099_00616	108524_3325_00766	108528_3330_00692	108546_3348_01023	112371_CAM000139_1663_00790
g00482_00005__g00482	gph	Phosphoglycolate phosphatase	460	0	1	12	4	NA	NA		gph(459):NA(32):ppaX(1)	162	639	105577_PA010_00514	105578_PA017_00965	105579_PA026_00473	105580_PA028_01011	105581_PA029_00603	105583_PA031_01296	105584_PA032_00306	105585_PA033_00716	105586_PA034_00444	105587_PA040_00622	105590_PA048_00841	105593_PA061_00676	105594_PA062_00422	105597_PA065_00394	105601_PA070_00345	105614_PA093_00642	105616_PV004_01305	105636_PV086_00974	105640_PV091_00686	105642_PV093_00726	105746_cerdo_0_1_C1_01369	105747_cerdo_0_1_C2_01346	108479_3070_00737	108481_3072_00504	108483_3074_00903	108486_3077_00351	108491_3082_00485	108492_3083_00957	108494_3085_00598	108498_3089_01021	108504_3095_00681	108508_3099_00617	108524_3325_00765	108528_3330_00693	108546_3348_01022	112371_CAM000139_1663_00791
g00010_00006__g00010	NA	Pyruvate:ferredoxin oxidoreductase	460	0	1	12	5	NA	NA		NA(460)	561	3561	105577_PA010_00515	105578_PA017_00966	105579_PA026_00474	105580_PA028_01012	105581_PA029_00604	105583_PA031_01295	105584_PA032_00307	105585_PA033_00717	105586_PA034_00445	105587_PA040_00623	105590_PA048_00842	105593_PA061_00677	105594_PA062_00423	105597_PA065_00395	105601_PA070_00346	105614_PA093_00643	105616_PV004_01306	105636_PV086_00975	105640_PV091_00685	105642_PV093_00727	105746_cerdo_0_1_C1_01368	105747_cerdo_0_1_C2_01345	108479_3070_00736	108481_3072_00503	108483_3074_00902	108486_3077_00350	108491_3082_00484	108492_3083_00956	108494_3085_01280	108498_3089_01022	108504_3095_00682	108508_3099_00618	108524_3325_00764	108528_3330_00694	108546_3348_01443	112371_CAM000139_1663_00792
g02100_1_00006__g02100_1	ndhC	NAD(P)H-quinone oxidoreductase subunit 3%2C chloroplastic	460	0	1	13	1	NA	NA		ndhC(461)	345	390	105577_PA010_01442	105578_PA017_00593	105579_PA026_01601	105580_PA028_01436	105581_PA029_00635	105583_PA031_01517;105583_PA031_01972	105584_PA032_00720	105585_PA033_01020	105586_PA034_01538	105587_PA040_01065	105590_PA048_01015	105593_PA061_00553	105594_PA062_01541	105597_PA065_00632	105601_PA070_00917	105614_PA093_00169	105616_PV004_00155	105636_PV086_00743	105640_PV091_00364	105642_PV093_01600	105746_cerdo_0_1_C1_00894	105747_cerdo_0_1_C2_00933	108479_3070_01017	108481_3072_01390	108483_3074_00768	108486_3077_00634	108491_3082_00520	108492_3083_00864	108494_3085_00809	108498_3089_00172	108504_3095_01410	108508_3099_01520	108524_3325_00278	108528_3330_01068	108546_3348_01097	112371_CAM000139_1663_01211
g00012_00006__g00012	nqo6	NADH-quinone oxidoreductase subunit 6	460	0	1	13	2	NA	NA		nqo6(460)	504	504	105577_PA010_01441	105578_PA017_00592	105579_PA026_01600	105580_PA028_01435	105581_PA029_00634	105583_PA031_01516	105584_PA032_00719	105585_PA033_01019	105586_PA034_01537	105587_PA040_01064	105590_PA048_01014	105593_PA061_00552	105594_PA062_01540	105597_PA065_00631	105601_PA070_00916	105614_PA093_00168	105616_PV004_00154	105636_PV086_00742	105640_PV091_00363	105642_PV093_01599	105746_cerdo_0_1_C1_00895	105747_cerdo_0_1_C2_00932	108479_3070_01016	108481_3072_01391	108483_3074_00767	108486_3077_00635	108491_3082_00519	108492_3083_00865	108494_3085_00810	108498_3089_00173	108504_3095_01409	108508_3099_01519	108524_3325_00277	108528_3330_01069	108546_3348_01096	112371_CAM000139_1663_01212
g00464_00004__g00464	ndhJ	NAD(P)H-quinone oxidoreductase subunit J%2C chloroplastic	460	0	1	13	3	NA	NA		ndhJ(460)	615	792	105577_PA010_01440	105578_PA017_00591	105579_PA026_01599	105580_PA028_01434	105581_PA029_00633	105583_PA031_01515	105584_PA032_00718	105585_PA033_01018	105586_PA034_01536	105587_PA040_01063	105590_PA048_01013	105593_PA061_00551	105594_PA062_01539	105597_PA065_00630	105601_PA070_00915	105614_PA093_00167	105616_PV004_00153	105636_PV086_00741	105640_PV091_00362	105642_PV093_01598	105746_cerdo_0_1_C1_00896	105747_cerdo_0_1_C2_00931	108479_3070_01015	108481_3072_01392	108483_3074_00766	108486_3077_00636	108491_3082_00518	108492_3083_00866	108494_3085_00811	108498_3089_00174	108504_3095_01408	108508_3099_01518	108524_3325_00276	108528_3330_01070	108546_3348_01095	112371_CAM000139_1663_01213
g00950_1_00009__g00950_1	nuoD	NADH-quinone oxidoreductase subunit D	460	0	1	13	4	NA	NA		nuoD(461)	399	1227	105577_PA010_01439	105578_PA017_00590	105579_PA026_01598	105580_PA028_01433	105581_PA029_00632	105583_PA031_01514;105583_PA031_01936	105584_PA032_00717	105585_PA033_01017	105586_PA034_01535	105587_PA040_01062	105590_PA048_01012	105593_PA061_00550	105594_PA062_01538	105597_PA065_00629	105601_PA070_00914	105614_PA093_00166	105616_PV004_00152	105636_PV086_00740	105640_PV091_00361	105642_PV093_01597	105746_cerdo_0_1_C1_00897	105747_cerdo_0_1_C2_00930	108479_3070_01014	108481_3072_01393	108483_3074_00765	108486_3077_00637	108491_3082_00517	108492_3083_00867	108494_3085_00812	108498_3089_00175	108504_3095_01407	108508_3099_01517	108524_3325_00275	108528_3330_01071	108546_3348_01094	112371_CAM000139_1663_01214
g01063_00003__g01063	hisH	Imidazole glycerol phosphate synthase subunit HisH	460	0	1	14	1	NA	NA		hisH(460)	243	588	105577_PA010_00382	105578_PA017_00622	105579_PA026_01233	105580_PA028_00628	105581_PA029_00663	105583_PA031_01260	105584_PA032_01134	105585_PA033_01040	105586_PA034_00281	105587_PA040_01093	105590_PA048_01043	105593_PA061_00581	105594_PA062_00751	105597_PA065_00660	105601_PA070_00945	105614_PA093_00197	105616_PV004_00185	105636_PV086_00771	105640_PV091_00393	105642_PV093_01464	105746_cerdo_0_1_C1_00868	105747_cerdo_0_1_C2_00959	108479_3070_00209	108481_3072_00257	108483_3074_00566	108486_3077_01271	108491_3082_00578	108492_3083_01068	108494_3085_00745	108498_3089_00143	108504_3095_00221	108508_3099_00365	108524_3325_00512	108528_3330_00195	108546_3348_01011	112371_CAM000139_1663_01189
g01032_00003__g01032	hisA	1-(5-phosphoribosyl)-5-[(5-phosphoribosylamino)methylideneamino] imidazole-4-carboxamide isomerase	460	0	1	14	2	NA	NA		hisA(460)	726	732	105577_PA010_00383	105578_PA017_00623	105579_PA026_01234	105580_PA028_00629	105581_PA029_00664	105583_PA031_01261	105584_PA032_01135	105585_PA033_01041	105586_PA034_00282	105587_PA040_01094	105590_PA048_01044	105593_PA061_00582	105594_PA062_00752	105597_PA065_00661	105601_PA070_00946	105614_PA093_00198	105616_PV004_00186	105636_PV086_00772	105640_PV091_00394	105642_PV093_01465	105746_cerdo_0_1_C1_00867	105747_cerdo_0_1_C2_00960	108479_3070_00210	108481_3072_00256	108483_3074_00565	108486_3077_01272	108491_3082_00577	108492_3083_01067	108494_3085_00744	108498_3089_00142	108504_3095_00222	108508_3099_00366	108524_3325_00511	108528_3330_00194	108546_3348_01010	112371_CAM000139_1663_01188
g01951_00005__g01951	hisF	Imidazole glycerol phosphate synthase subunit HisF	460	0	1	14	3	NA	NA		hisF(460)	768	792	105577_PA010_00384	105578_PA017_00624	105579_PA026_01235	105580_PA028_00630	105581_PA029_00665	105583_PA031_01264	105584_PA032_01136	105585_PA033_01044	105586_PA034_00283	105587_PA040_01096	105590_PA048_01045	105593_PA061_00583	105594_PA062_00753	105597_PA065_00662	105601_PA070_00947	105614_PA093_00199	105616_PV004_00187	105636_PV086_00773	105640_PV091_00395	105642_PV093_01466	105746_cerdo_0_1_C1_00866	105747_cerdo_0_1_C2_00961	108479_3070_00211	108481_3072_00255	108483_3074_00564	108486_3077_01273	108491_3082_00576	108492_3083_01066	108494_3085_00743	108498_3089_00141	108504_3095_00224	108508_3099_00367	108524_3325_00509	108528_3330_00192	108546_3348_01009	112371_CAM000139_1663_01187
g01637_00004__g01637	hisI	Histidine biosynthesis bifunctional protein HisIE	460	0	1	14	4	NA	NA		hisI(460)	588	624	105577_PA010_00385	105578_PA017_00625	105579_PA026_01236	105580_PA028_00631	105581_PA029_00666	105583_PA031_01265	105584_PA032_01137	105585_PA033_01045	105586_PA034_00284	105587_PA040_01097	105590_PA048_01046	105593_PA061_00584	105594_PA062_00754	105597_PA065_00663	105601_PA070_00948	105614_PA093_00200	105616_PV004_00188	105636_PV086_00774	105640_PV091_00396	105642_PV093_01467	105746_cerdo_0_1_C1_00865	105747_cerdo_0_1_C2_00962	108479_3070_00212	108481_3072_00254	108483_3074_00563	108486_3077_01274	108491_3082_00575	108492_3083_01065	108494_3085_00742	108498_3089_00140	108504_3095_00225	108508_3099_00368	108524_3325_00508	108528_3330_00191	108546_3348_01008	112371_CAM000139_1663_01186
g00032_00006__g00032	flgC	Flagellar basal-body rod protein FlgC	460	0	1	15	1	NA	NA		flgC(460)	495	495	105577_PA010_00218	105578_PA017_00311	105579_PA026_00712	105580_PA028_00582	105581_PA029_00318	105583_PA031_00078	105584_PA032_00074	105585_PA033_00634	105586_PA034_00171	105587_PA040_00077	105590_PA048_00578	105593_PA061_00836	105594_PA062_00092	105597_PA065_00842	105601_PA070_00709	105614_PA093_00072	105616_PV004_01053	105636_PV086_00521	105640_PV091_00252	105642_PV093_00577	105746_cerdo_0_1_C1_00548	105747_cerdo_0_1_C2_00635	108479_3070_00291	108481_3072_00033	108483_3074_00018	108486_3077_00173	108491_3082_01000	108492_3083_00182	108494_3085_00623	108498_3089_00019	108504_3095_00484	108508_3099_00054	108524_3325_01476	108528_3330_01220	108546_3348_00294	112371_CAM000139_1663_00612
g01395_00005__g01395	fliE	Flagellar hook-basal body complex protein FliE	460	0	1	15	2	NA	NA		fliE(460)	300	300	105577_PA010_00217	105578_PA017_00312	105579_PA026_00711	105580_PA028_00581	105581_PA029_00317	105583_PA031_00077	105584_PA032_00075	105585_PA033_00633	105586_PA034_00172	105587_PA040_00078	105590_PA048_00577	105593_PA061_00835	105594_PA062_00091	105597_PA065_00841	105601_PA070_00708	105614_PA093_00073	105616_PV004_01052	105636_PV086_00520	105640_PV091_00253	105642_PV093_00576	105746_cerdo_0_1_C1_00547	105747_cerdo_0_1_C2_00636	108479_3070_00290	108481_3072_00034	108483_3074_00019	108486_3077_00174	108491_3082_00999	108492_3083_00183	108494_3085_00624	108498_3089_00020	108504_3095_00485	108508_3099_00055	108524_3325_01475	108528_3330_01219	108546_3348_00293	112371_CAM000139_1663_00613
g00071_00006__g00071	ftsI	Peptidoglycan D%2CD-transpeptidase FtsI	460	0	1	15	3	NA	NA		ftsI(459):spoVD(1)	705	1806	105577_PA010_00216	105578_PA017_00313	105579_PA026_00710	105580_PA028_00580	105581_PA029_00316	105583_PA031_00076	105584_PA032_00076	105585_PA033_00632	105586_PA034_00173	105587_PA040_00079	105590_PA048_00576	105593_PA061_00834	105594_PA062_00090	105597_PA065_00840	105601_PA070_00707	105614_PA093_00074	105616_PV004_01051	105636_PV086_00519	105640_PV091_00254	105642_PV093_00575	105746_cerdo_0_1_C1_00546	105747_cerdo_0_1_C2_00637	108479_3070_00289	108481_3072_00035	108483_3074_00020	108486_3077_00175	108491_3082_00998	108492_3083_00184	108494_3085_00625	108498_3089_00021	108504_3095_00486	108508_3099_00056	108524_3325_00399	108528_3330_01218	108546_3348_00292	112371_CAM000139_1663_00614
g01343_00004__g01343	NA	hypothetical protein	460	0	1	15	4	NA	NA		NA(460)	342	435	105577_PA010_00214	105578_PA017_00315	105579_PA026_00708	105580_PA028_00578	105581_PA029_00314	105583_PA031_00074	105584_PA032_00078	105585_PA033_00630	105586_PA034_00175	105587_PA040_00081	105590_PA048_00574	105593_PA061_00832	105594_PA062_00088	105597_PA065_00838	105601_PA070_00705	105614_PA093_00076	105616_PV004_01049	105636_PV086_00517	105640_PV091_00256	105642_PV093_00573	105746_cerdo_0_1_C1_00544	105747_cerdo_0_1_C2_00639	108479_3070_00287	108481_3072_00037	108483_3074_00022	108486_3077_00177	108491_3082_00996	108492_3083_00186	108494_3085_00627	108498_3089_00023	108504_3095_00488	108508_3099_00058	108524_3325_00401	108528_3330_01332	108546_3348_00290	112371_CAM000139_1663_00616
g00535_00004__g00535	pyrC	Dihydroorotase	460	0	1	16	1	NA	NA		pyrC(460)	258	1182	105577_PA010_00962	105578_PA017_00199	105579_PA026_00884	105580_PA028_00774	105581_PA029_01112	105583_PA031_00279	105584_PA032_00809	105585_PA033_00492	105586_PA034_00968	105587_PA040_01368	105590_PA048_01134	105593_PA061_01204	105594_PA062_00660	105597_PA065_01214	105601_PA070_00216	105614_PA093_01156	105616_PV004_00728	105636_PV086_00388	105640_PV091_00636	105642_PV093_01132	105746_cerdo_0_1_C1_00056	105747_cerdo_0_1_C2_00399	108479_3070_00618	108481_3072_00360	108483_3074_00128	108486_3077_00478	108491_3082_00293	108492_3083_00234	108494_3085_00825	108498_3089_00507	108504_3095_00367	108508_3099_00176	108524_3325_01072	108528_3330_01050	108546_3348_01279	112371_CAM000139_1663_00056
g01802_00005__g01802	NA	hypothetical protein	460	0	1	16	2	NA	NA		NA(460)	600	1527	105577_PA010_00961	105578_PA017_00198	105579_PA026_00885	105580_PA028_00775	105581_PA029_01111	105583_PA031_00278	105584_PA032_00810	105585_PA033_00491	105586_PA034_00967	105587_PA040_01367	105590_PA048_01135	105593_PA061_01203	105594_PA062_00659	105597_PA065_01213	105601_PA070_00215	105614_PA093_01155	105616_PV004_00729	105636_PV086_00387	105640_PV091_00637	105642_PV093_01133	105746_cerdo_0_1_C1_00057	105747_cerdo_0_1_C2_00398	108479_3070_00617	108481_3072_00359	108483_3074_00127	108486_3077_00477	108491_3082_00292	108492_3083_00233	108494_3085_00826	108498_3089_00506	108504_3095_00366	108508_3099_00177	108524_3325_01071	108528_3330_01051	108546_3348_01280	112371_CAM000139_1663_00057
g00679_00004__g00679	NA	hypothetical protein	460	0	1	16	3	NA	NA		NA(461)	351	819	105577_PA010_00960	105578_PA017_00197	105579_PA026_00886	105580_PA028_00776	105581_PA029_01110	105583_PA031_00277	105584_PA032_00811	105585_PA033_00490	105586_PA034_01816	105587_PA040_01366	105590_PA048_01136	105593_PA061_01202	105594_PA062_00658	105597_PA065_01212	105601_PA070_00214	105614_PA093_01154	105616_PV004_00730	105636_PV086_00386	105640_PV091_00638	105642_PV093_01134	105746_cerdo_0_1_C1_00058	105747_cerdo_0_1_C2_00397	108479_3070_00616	108481_3072_00358	108483_3074_00126	108486_3077_00476	108491_3082_00291	108492_3083_00232	108494_3085_01359	108498_3089_00505	108504_3095_00365	108508_3099_00700	108524_3325_01069;108524_3325_01070	108528_3330_00643	108546_3348_01547	112371_CAM000139_1663_00058
g00199_00005__g00199	dctA	Aerobic C4-dicarboxylate transport protein	460	0	1	16	4	NA	NA		dctA(510):dctA2(28):NA(10)	180	1377	105577_PA010_00959	105578_PA017_00196	105579_PA026_00887	105580_PA028_00777	105581_PA029_01109	105583_PA031_00276	105584_PA032_00812	105585_PA033_00489	105586_PA034_01815	105587_PA040_01365	105590_PA048_01137	105593_PA061_01201	105594_PA062_00657	105597_PA065_01211	105601_PA070_00213	105614_PA093_01153	105616_PV004_00731	105636_PV086_00385	105640_PV091_00639	105642_PV093_01135	105746_cerdo_0_1_C1_00059;105746_cerdo_0_1_C1_00060	105747_cerdo_0_1_C2_00395;105747_cerdo_0_1_C2_00396	108479_3070_00614;108479_3070_00615	108481_3072_00356;108481_3072_00357	108483_3074_00124;108483_3074_00125	108486_3077_00474;108486_3077_00475	108491_3082_00289;108491_3082_00290	108492_3083_00230;108492_3083_00231	108494_3085_01358	108498_3089_00504	108504_3095_00364	108508_3099_00699	108524_3325_01068	108528_3330_00641;108528_3330_00642	108546_3348_01548	112371_CAM000139_1663_00059
g00026_00006__g00026	fabZ	3-hydroxyacyl-[acyl-carrier-protein] dehydratase FabZ	460	0	1	17	1	NA	NA		fabZ(460)	390	441	105577_PA010_00842	105578_PA017_00578	105579_PA026_00164	105580_PA028_00332	105581_PA029_00493	105583_PA031_01557	105584_PA032_00492	105585_PA033_00253	105586_PA034_00921	105587_PA040_00341	105590_PA048_00324	105593_PA061_00452	105594_PA062_00528	105597_PA065_00170	105601_PA070_00619	105614_PA093_00433	105616_PV004_00975	105636_PV086_01484	105640_PV091_00008	105642_PV093_00008	105746_cerdo_0_1_C1_00924	105747_cerdo_0_1_C2_00903	108479_3070_01406	108481_3072_01503	108483_3074_00746	108486_3077_01278	108491_3082_00896	108492_3083_01326	108494_3085_00694	108498_3089_01537	108504_3095_00113	108508_3099_01252	108524_3325_00217	108528_3330_01019	108546_3348_01031	112371_CAM000139_1663_00917
g00041_00006__g00041	lpxA	Acyl-[acyl-carrier-protein]--UDP-N-acetylglucosamine O-acyltransferase	460	0	1	17	2	NA	NA		lpxA(460)	792	792	105577_PA010_00843	105578_PA017_00577	105579_PA026_00165	105580_PA028_00331	105581_PA029_00494	105583_PA031_01558	105584_PA032_00493	105585_PA033_00254	105586_PA034_00922	105587_PA040_00340	105590_PA048_00323	105593_PA061_00453	105594_PA062_00529	105597_PA065_00169	105601_PA070_00618	105614_PA093_00434	105616_PV004_00976	105636_PV086_01483	105640_PV091_00009	105642_PV093_00009	105746_cerdo_0_1_C1_00925	105747_cerdo_0_1_C2_00902	108479_3070_01405	108481_3072_01504	108483_3074_00745	108486_3077_01277	108491_3082_00897	108492_3083_01327	108494_3085_00693	108498_3089_01538	108504_3095_00112	108508_3099_01253	108524_3325_00216	108528_3330_01018	108546_3348_01030	112371_CAM000139_1663_00918
g00031_00006__g00031	clpX	ATP-dependent Clp protease ATP-binding subunit ClpX	460	0	1	17	3	NA	NA		clpX(460)	912	1236	105577_PA010_00844	105578_PA017_00576	105579_PA026_00166	105580_PA028_00330	105581_PA029_00495	105583_PA031_01559	105584_PA032_00494	105585_PA033_00255	105586_PA034_00923	105587_PA040_00339	105590_PA048_00322	105593_PA061_00454	105594_PA062_00530	105597_PA065_00168	105601_PA070_00617	105614_PA093_00435	105616_PV004_00977	105636_PV086_01482	105640_PV091_00010	105642_PV093_00010	105746_cerdo_0_1_C1_00926	105747_cerdo_0_1_C2_00901	108479_3070_01404	108481_3072_01505	108483_3074_00744	108486_3077_01276	108491_3082_00898	108492_3083_01328	108494_3085_00692	108498_3089_01539	108504_3095_00111	108508_3099_01254	108524_3325_00215	108528_3330_01017	108546_3348_01029	112371_CAM000139_1663_00919
g00021_00006__g00021	mreB	Cell shape-determining protein MreB	460	0	1	17	4	NA	NA		mreB(460)	609	1041	105577_PA010_00845	105578_PA017_00575	105579_PA026_00167	105580_PA028_00329	105581_PA029_00496	105583_PA031_01560	105584_PA032_00495	105585_PA033_00256	105586_PA034_00924	105587_PA040_00338	105590_PA048_00321	105593_PA061_00455	105594_PA062_00531	105597_PA065_00167	105601_PA070_00616	105614_PA093_00436	105616_PV004_00978	105636_PV086_01481	105640_PV091_00011	105642_PV093_00011	105746_cerdo_0_1_C1_00927	105747_cerdo_0_1_C2_00900	108479_3070_01403	108481_3072_01506	108483_3074_00743	108486_3077_01275	108491_3082_00899	108492_3083_01329	108494_3085_00691	108498_3089_01540	108504_3095_00110	108508_3099_01255	108524_3325_00213	108528_3330_01016	108546_3348_01028	112371_CAM000139_1663_00920
g01117_00003__g01117	gdnD	putative guanidinium efflux system subunit GdnD	460	0	1	18	1	NA	NA		gdnD(460)	315	315	105577_PA010_00894	105578_PA017_00524	105579_PA026_00213	105580_PA028_00283	105581_PA029_00542	105583_PA031_00369	105584_PA032_00543	105585_PA033_00297	105586_PA034_01518	105587_PA040_00291	105590_PA048_00275	105593_PA061_00501	105594_PA062_00577	105597_PA065_00121	105601_PA070_00570	105614_PA093_00484	105616_PV004_01361	105636_PV086_01437	105640_PV091_00057	105642_PV093_00059	105746_cerdo_0_1_C1_00976	105747_cerdo_0_1_C2_00851	108479_3070_00143	108481_3072_00170	108483_3074_01116	108486_3077_00534	108491_3082_00400	108492_3083_01081	108494_3085_00951	108498_3089_00552	108504_3095_00711	108508_3099_01028	108524_3325_00449	108528_3330_00064	108546_3348_00989	112371_CAM000139_1663_00966
g00732_00003__g00732	gdnC	putative guanidinium efflux system subunit GdnC	460	0	1	18	2	NA	NA		gdnC(458):gdx(1):NA(1)	261	363	105577_PA010_00895	105578_PA017_00523	105579_PA026_00214	105580_PA028_00282	105581_PA029_00543	105583_PA031_00368	105584_PA032_00544	105585_PA033_00298	105586_PA034_01517	105587_PA040_00290	105590_PA048_00274	105593_PA061_00502	105594_PA062_00578	105597_PA065_00120	105601_PA070_00569	105614_PA093_00485	105616_PV004_01360	105636_PV086_01436	105640_PV091_00058	105642_PV093_00060	105746_cerdo_0_1_C1_00977	105747_cerdo_0_1_C2_00850	108479_3070_00144	108481_3072_00171	108483_3074_01115	108486_3077_00533	108491_3082_00401	108492_3083_01082	108494_3085_00952	108498_3089_00553	108504_3095_00712	108508_3099_01027	108524_3325_00450	108528_3330_00063	108546_3348_00990	112371_CAM000139_1663_00967
g01660_00005__g01660	rplY	50S ribosomal protein L25	460	0	1	18	3	NA	NA		rplY(460)	537	537	105577_PA010_00896	105578_PA017_00522	105579_PA026_00215	105580_PA028_00281	105581_PA029_00544	105583_PA031_00367	105584_PA032_00545	105585_PA033_00299	105586_PA034_01516	105587_PA040_00289	105590_PA048_00273	105593_PA061_00503	105594_PA062_00579	105597_PA065_00119	105601_PA070_00568	105614_PA093_00486	105616_PV004_01359	105636_PV086_01435	105640_PV091_00059	105642_PV093_00061	105746_cerdo_0_1_C1_00978	105747_cerdo_0_1_C2_00849	108479_3070_00145	108481_3072_00172	108483_3074_01114	108486_3077_00532	108491_3082_00402	108492_3083_01083	108494_3085_00953	108498_3089_00554	108504_3095_00713	108508_3099_01026	108524_3325_00451	108528_3330_00062	108546_3348_00991	112371_CAM000139_1663_00968
g00710_00004__g00710	pth	Peptidyl-tRNA hydrolase	460	0	1	18	4	NA	NA		pth(460)	543	546	105577_PA010_00897	105578_PA017_00521	105579_PA026_00216	105580_PA028_00280	105581_PA029_00545	105583_PA031_00366	105584_PA032_00546	105585_PA033_00300	105586_PA034_01515	105587_PA040_00288	105590_PA048_00272	105593_PA061_00504	105594_PA062_00580	105597_PA065_00118	105601_PA070_00567	105614_PA093_00487	105616_PV004_01358	105636_PV086_01434	105640_PV091_00060	105642_PV093_00062	105746_cerdo_0_1_C1_00979	105747_cerdo_0_1_C2_00848	108479_3070_00146	108481_3072_00173	108483_3074_01113	108486_3077_00531	108491_3082_00403	108492_3083_01084	108494_3085_00954	108498_3089_00555	108504_3095_00714	108508_3099_01025	108524_3325_00452	108528_3330_00061	108546_3348_00992	112371_CAM000139_1663_00969
g00406_00004__g00406	kpsT	Polysialic acid transport ATP-binding protein KpsT	460	0	1	19	1	NA	NA		kpsT(461)	294	663	105577_PA010_00544	105578_PA017_00995	105579_PA026_00502	105580_PA028_01614	105581_PA029_01522	105583_PA031_01339	105584_PA032_01393	105585_PA033_01464	105586_PA034_00474	105587_PA040_00651	105590_PA048_00870	105593_PA061_00705	105594_PA062_00451	105597_PA065_00423	105601_PA070_00374	105614_PA093_00671	105616_PV004_01156	105636_PV086_01004	105640_PV091_00656	105642_PV093_00756	105746_cerdo_0_1_C1_01340	105747_cerdo_0_1_C2_01317	108479_3070_00706	108481_3072_01454	108483_3074_01435	108486_3077_01328	108491_3082_01149	108492_3083_01060	108494_3085_00477	108498_3089_01330	108504_3095_01183	108508_3099_01272	108524_3325_00704	108528_3330_00914	108546_3348_00784	112371_CAM000139_1663_00821
g00189_00003__g00189	NA	hypothetical protein	460	0	1.01	19	2	NA	NA		NA(463)	264	1128	105577_PA010_00545	105578_PA017_00996	105579_PA026_00503	105580_PA028_01615	105581_PA029_01523	105583_PA031_01340;105583_PA031_01891	105584_PA032_01392	105585_PA033_01465	105586_PA034_00475	105587_PA040_00652	105590_PA048_00871	105593_PA061_00706	105594_PA062_00452	105597_PA065_00424	105601_PA070_00375	105614_PA093_00672	105616_PV004_01155	105636_PV086_01005	105640_PV091_00655	105642_PV093_00757	105746_cerdo_0_1_C1_01339	105747_cerdo_0_1_C2_01316	108479_3070_00705	108481_3072_01453	108483_3074_01436	108486_3077_01329	108491_3082_01150	108492_3083_01061	108494_3085_00476	108498_3089_01331	108504_3095_01182	108508_3099_01273	108524_3325_00703	108528_3330_00915	108546_3348_00785	112371_CAM000139_1663_00822
g00373_00003__g00373	kpsD	Polysialic acid transport protein KpsD	460	0	1.01	19	3	NA	NA		kpsD(464):NA(2)	126	1662	105577_PA010_00546	105578_PA017_00997	105579_PA026_00504	105580_PA028_01616	105581_PA029_01524	105583_PA031_01341	105584_PA032_01391	105585_PA033_01466	105586_PA034_00476	105587_PA040_00653	105590_PA048_00872	105593_PA061_00707	105594_PA062_00453	105597_PA065_00425	105601_PA070_00376	105614_PA093_00673	105616_PV004_01154	105636_PV086_01006	105640_PV091_00654	105642_PV093_00758;105642_PV093_01849	105746_cerdo_0_1_C1_01338	105747_cerdo_0_1_C2_01315	108479_3070_00704	108481_3072_01452	108483_3074_01437	108486_3077_01330	108491_3082_01151	108492_3083_01431	108494_3085_00475	108498_3089_01332	108504_3095_01181	108508_3099_01274	108524_3325_00702	108528_3330_00916	108546_3348_00786	112371_CAM000139_1663_00823
g00248_00004__g00248	kdsD	Arabinose 5-phosphate isomerase KdsD	460	0	1.01	19	4	NA	NA		kdsD(359):kpsF(103):NA(1)	258	954	105577_PA010_00547	105578_PA017_00998	105579_PA026_00505	105580_PA028_01617	105581_PA029_01525	105583_PA031_01342;105583_PA031_01888	105584_PA032_01390	105585_PA033_01467	105586_PA034_00477	105587_PA040_00654	105590_PA048_00873	105593_PA061_00708	105594_PA062_00454	105597_PA065_00426	105601_PA070_00377	105614_PA093_00674	105616_PV004_01153	105636_PV086_01007	105640_PV091_00653	105642_PV093_00759	105746_cerdo_0_1_C1_01337	105747_cerdo_0_1_C2_01314	108479_3070_00703	108481_3072_01451	108483_3074_01438	108486_3077_01331	108491_3082_01152	108492_3083_01430	108494_3085_00474	108498_3089_01333	108504_3095_01180	108508_3099_01275	108524_3325_00701	108528_3330_00917	108546_3348_00787	112371_CAM000139_1663_00824
g00044_00006__g00044	pomA	Chemotaxis protein PomA	460	0	1	20	1	NA	NA		pomA(460)	777	777	105577_PA010_00343	105578_PA017_00494	105579_PA026_00243	105580_PA028_00253	105581_PA029_00783	105583_PA031_00339	105584_PA032_00380	105585_PA033_00327	105586_PA034_01543	105587_PA040_00261	105590_PA048_00245	105593_PA061_00531	105594_PA062_01384	105597_PA065_00091	105601_PA070_00540	105614_PA093_00370	105616_PV004_00454	105636_PV086_01407	105640_PV091_00087	105642_PV093_00089	105746_cerdo_0_1_C1_01006	105747_cerdo_0_1_C2_00821	108479_3070_00173	108481_3072_00200	108483_3074_01029	108486_3077_01051	108491_3082_00212	108492_3083_01282	108494_3085_00997	108498_3089_01605	108504_3095_01229	108508_3099_00863	108524_3325_00831	108528_3330_01202	108546_3348_00698	112371_CAM000139_1663_00996
g01601_00005__g01601	motB	Motility protein B	460	0	1	20	2	NA	NA		motB(460)	729	732	105577_PA010_00344	105578_PA017_00495	105579_PA026_00242	105580_PA028_00254	105581_PA029_00784	105583_PA031_00340	105584_PA032_00381	105585_PA033_00326	105586_PA034_01544	105587_PA040_00262	105590_PA048_00246	105593_PA061_00530	105594_PA062_01385	105597_PA065_00092	105601_PA070_00541	105614_PA093_00371	105616_PV004_00455	105636_PV086_01408	105640_PV091_00086	105642_PV093_00088	105746_cerdo_0_1_C1_01005	105747_cerdo_0_1_C2_00822	108479_3070_00172	108481_3072_00199	108483_3074_01030	108486_3077_01052	108491_3082_00213	108492_3083_01281	108494_3085_00998	108498_3089_01606	108504_3095_01228	108508_3099_00862	108524_3325_00830	108528_3330_01203	108546_3348_00697	112371_CAM000139_1663_00995
g00011_00006__g00011	flhB	Flagellar biosynthetic protein FlhB	460	0	1	20	3	NA	NA		flhB(460)	945	1089	105577_PA010_00345	105578_PA017_00496	105579_PA026_00241	105580_PA028_00255	105581_PA029_00785	105583_PA031_00341	105584_PA032_00382	105585_PA033_00325	105586_PA034_01545	105587_PA040_00263	105590_PA048_00247	105593_PA061_00529	105594_PA062_01386	105597_PA065_00093	105601_PA070_00542	105614_PA093_00372	105616_PV004_00456	105636_PV086_01409	105640_PV091_00085	105642_PV093_00087	105746_cerdo_0_1_C1_01004	105747_cerdo_0_1_C2_00823	108479_3070_00171	108481_3072_00198	108483_3074_01031	108486_3077_01053	108491_3082_00214	108492_3083_01280	108494_3085_00999	108498_3089_01607	108504_3095_01227	108508_3099_00861	108524_3325_00829	108528_3330_01204	108546_3348_00696	112371_CAM000139_1663_00994
g00057_00006__g00057	ahpC	Alkyl hydroperoxide reductase C	460	0	1	20	4	NA	NA		ahpC(460)	216	597	105577_PA010_00346	105578_PA017_00497	105579_PA026_00240	105580_PA028_00256	105581_PA029_00786	105583_PA031_00342	105584_PA032_00383	105585_PA033_00324	105586_PA034_01546	105587_PA040_00264	105590_PA048_00248	105593_PA061_00528	105594_PA062_01387	105597_PA065_00094	105601_PA070_00543	105614_PA093_00373	105616_PV004_00457	105636_PV086_01410	105640_PV091_00084	105642_PV093_00086	105746_cerdo_0_1_C1_01003	105747_cerdo_0_1_C2_00824	108479_3070_00170	108481_3072_00197	108483_3074_01032	108486_3077_01054	108491_3082_00215	108492_3083_01279	108494_3085_01511	108498_3089_01608	108504_3095_01226	108508_3099_00860	108524_3325_00828	108528_3330_01205	108546_3348_00695	112371_CAM000139_1663_00993
g01038_00002__g01038	NA	hypothetical protein	460	0	1	21	1	NA	NA		NA(462)	258	702	105577_PA010_00477	105578_PA017_00927	105579_PA026_00436	105580_PA028_00974	105581_PA029_00566	105583_PA031_01635;105583_PA031_01914	105584_PA032_00269	105585_PA033_00677	105586_PA034_00407	105587_PA040_00583	105590_PA048_00804	105593_PA061_00639	105594_PA062_00385	105597_PA065_00357	105601_PA070_00308	105614_PA093_00604	105616_PV004_01145	105636_PV086_00937	105640_PV091_00724	105642_PV093_00688	105746_cerdo_0_1_C1_01514	105747_cerdo_0_1_C2_01512	108479_3070_01319	108481_3072_01667	108483_3074_00721	108486_3077_00974	108491_3082_01230	108492_3083_00909	108494_3085_00881	108498_3089_01122	108504_3095_01190	108508_3099_00479	108524_3325_00033	108528_3330_01109	108546_3348_01113	112371_CAM000139_1663_00754
g01425_00003__g01425	NA	hypothetical protein	460	0	1	21	2	NA	NA		NA(461)	192	198	105577_PA010_00478	105578_PA017_00928	105579_PA026_00437	105580_PA028_00975	105581_PA029_00567	105583_PA031_01634;105583_PA031_01915	105584_PA032_00270	105585_PA033_00678	105586_PA034_00408	105587_PA040_00584	105590_PA048_00805	105593_PA061_00640	105594_PA062_00386	105597_PA065_00358	105601_PA070_00309	105614_PA093_00605	105616_PV004_01144	105636_PV086_00938	105640_PV091_00723	105642_PV093_00689	105746_cerdo_0_1_C1_01513	105747_cerdo_0_1_C2_01513	108479_3070_01320	108481_3072_01668	108483_3074_00720	108486_3077_00973	108491_3082_01229	108492_3083_00910	108494_3085_00882	108498_3089_01121	108504_3095_01189	108508_3099_00480	108524_3325_00032	108528_3330_01110	108546_3348_01112	112371_CAM000139_1663_00755
g01347_1_00008__g01347_1	fdnG-3	Formate dehydrogenase 2 subunit alpha (cytochrome c-553)	460	0	1	21	3	NA	NA		fdnG-3(458):NA(2)	210	543	105577_PA010_00479	105578_PA017_00929	105579_PA026_00438	105580_PA028_00976	105581_PA029_00568	105583_PA031_01633	105584_PA032_00271	105585_PA033_00679	105586_PA034_00409	105587_PA040_00585	105590_PA048_00806	105593_PA061_00641	105594_PA062_00387	105597_PA065_00359	105601_PA070_00310	105614_PA093_00606	105616_PV004_01143	105636_PV086_00939	105640_PV091_00722	105642_PV093_00690	105746_cerdo_0_1_C1_01512	105747_cerdo_0_1_C2_01514	108479_3070_01321	108481_3072_01669	108483_3074_00719	108486_3077_00972	108491_3082_01228	108492_3083_00911	108494_3085_00883	108498_3089_01120	108504_3095_01188	108508_3099_00481	108524_3325_00031	108528_3330_01111	108546_3348_01111	112371_CAM000139_1663_00756
g01202_1_00009__g01202_1	napA	Periplasmic nitrate reductase	460	0	1	21	4	NA	NA		napA(459):NA(1)	1110	2241	105577_PA010_00480	105578_PA017_00930	105579_PA026_00439	105580_PA028_00977	105581_PA029_00569	105583_PA031_01632	105584_PA032_00272	105585_PA033_00680	105586_PA034_00410	105587_PA040_00586	105590_PA048_00807	105593_PA061_00642	105594_PA062_00388	105597_PA065_00360	105601_PA070_00311	105614_PA093_00607	105616_PV004_01142	105636_PV086_00940	105640_PV091_00721	105642_PV093_00691	105746_cerdo_0_1_C1_01511	105747_cerdo_0_1_C2_01515	108479_3070_01322	108481_3072_01670	108483_3074_00718	108486_3077_00971	108491_3082_01227	108492_3083_00912	108494_3085_00884	108498_3089_01119	108504_3095_01187	108508_3099_00482	108524_3325_00030	108528_3330_01112	108546_3348_01110	112371_CAM000139_1663_00757
g01702_00004__g01702	NA	hypothetical protein	460	0	1	22	1	NA	NA		NA(460)	309	423	105577_PA010_00330	105578_PA017_00481	105579_PA026_00256	105580_PA028_00240	105581_PA029_00770	105583_PA031_00326	105584_PA032_00367	105585_PA033_00340	105586_PA034_00627	105587_PA040_00248	105590_PA048_00232	105593_PA061_00788	105594_PA062_01219	105597_PA065_00078	105601_PA070_00527	105614_PA093_00357	105616_PV004_00441	105636_PV086_01394	105640_PV091_00100	105642_PV093_00102	105746_cerdo_0_1_C1_01019	105747_cerdo_0_1_C2_00808	108479_3070_00186	108481_3072_01301	108483_3074_01252	108486_3077_01114	108491_3082_00199	108492_3083_01023	108494_3085_01349	108498_3089_01165	108504_3095_01032	108508_3099_00657	108524_3325_00304	108528_3330_00713	108546_3348_00231	112371_CAM000139_1663_01009
g02144_00004__g02144	fliN	Flagellar motor switch protein FliN	460	0	1	22	2	NA	NA		fliN(460)	309	309	105577_PA010_00329	105578_PA017_00480	105579_PA026_00257	105580_PA028_00239	105581_PA029_00769	105583_PA031_00325	105584_PA032_00366	105585_PA033_00341	105586_PA034_00626	105587_PA040_00247	105590_PA048_00231	105593_PA061_00787	105594_PA062_01218	105597_PA065_00077	105601_PA070_00526	105614_PA093_00356	105616_PV004_00440	105636_PV086_01393	105640_PV091_00101	105642_PV093_00103	105746_cerdo_0_1_C1_01020	105747_cerdo_0_1_C2_00807	108479_3070_00187	108481_3072_01300	108483_3074_01253	108486_3077_01115	108491_3082_00198	108492_3083_01024	108494_3085_01348	108498_3089_01164	108504_3095_01033	108508_3099_00658	108524_3325_00303	108528_3330_00712	108546_3348_00230	112371_CAM000139_1663_01010
g01291_00004__g01291	NA	hypothetical protein	460	0	1	22	3	NA	NA		NA(460)	447	795	105577_PA010_00328	105578_PA017_00479	105579_PA026_00258	105580_PA028_00238	105581_PA029_00768	105583_PA031_00324	105584_PA032_00365	105585_PA033_00342	105586_PA034_00625	105587_PA040_00246	105590_PA048_00230	105593_PA061_00786	105594_PA062_01217	105597_PA065_00076	105601_PA070_00525	105614_PA093_00355	105616_PV004_00439	105636_PV086_01392	105640_PV091_00102	105642_PV093_00104	105746_cerdo_0_1_C1_01021	105747_cerdo_0_1_C2_00806	108479_3070_00188	108481_3072_01299	108483_3074_01254	108486_3077_01116	108491_3082_00197	108492_3083_01025	108494_3085_01347	108498_3089_01163	108504_3095_01034	108508_3099_00659	108524_3325_00302	108528_3330_00711	108546_3348_00229	112371_CAM000139_1663_01011
g00913_00005__g00913	gppA	Guanosine-5'-triphosphate%2C3'-diphosphate pyrophosphatase	460	0	1	22	4	NA	NA		gppA(455):NA(6)	378	1461	105577_PA010_00327	105578_PA017_00478	105579_PA026_00259	105580_PA028_00237	105581_PA029_00767	105583_PA031_00323	105584_PA032_00364	105585_PA033_00343	105586_PA034_00624	105587_PA040_00245	105590_PA048_00229	105593_PA061_00785	105594_PA062_01216	105597_PA065_00075	105601_PA070_00524	105614_PA093_00354	105616_PV004_00438	105636_PV086_01391	105640_PV091_00103	105642_PV093_00105	105746_cerdo_0_1_C1_01022	105747_cerdo_0_1_C2_00805	108479_3070_00189	108481_3072_01298	108483_3074_01255	108486_3077_01117	108491_3082_00196	108492_3083_01026	108494_3085_01346	108498_3089_01162	108504_3095_01035	108508_3099_00660	108524_3325_00301	108528_3330_00710	108546_3348_00228	112371_CAM000139_1663_01012
g01187_00006__g01187	acsA	Acetyl-coenzyme A synthetase	460	0	1	23	1	NA	NA		acsA(472)	216	2058	105577_PA010_00848	105578_PA017_00572	105579_PA026_00170	105580_PA028_00326	105581_PA029_00499	105583_PA031_01563	105584_PA032_00498	105585_PA033_00259	105586_PA034_00927	105587_PA040_00335	105590_PA048_00318	105593_PA061_00458	105594_PA062_00534	105597_PA065_00164	105601_PA070_00613	105614_PA093_00439	105616_PV004_00981	105636_PV086_01478	105640_PV091_00014	105642_PV093_00014	105746_cerdo_0_1_C1_00930	105747_cerdo_0_1_C2_00897	108479_3070_00097	108481_3072_00124	108483_3074_00740	108486_3077_01155	108491_3082_00808	108492_3083_00855	108494_3085_00466	108498_3089_00510	108504_3095_00107	108508_3099_00810	108524_3325_00209	108528_3330_00853	108546_3348_00753	112371_CAM000139_1663_00923
g00042_00006__g00042	prpB	2-methylisocitrate lyase	460	0	1	23	2	NA	NA		prpB(460)	876	876	105577_PA010_00849	105578_PA017_00571	105579_PA026_00171	105580_PA028_00325	105581_PA029_00500	105583_PA031_01564	105584_PA032_00499	105585_PA033_00260	105586_PA034_00928	105587_PA040_00334	105590_PA048_00317	105593_PA061_00459	105594_PA062_00535	105597_PA065_00163	105601_PA070_00612	105614_PA093_00440	105616_PV004_00982	105636_PV086_01477	105640_PV091_00015	105642_PV093_00015	105746_cerdo_0_1_C1_00931	105747_cerdo_0_1_C2_00896	108479_3070_00098	108481_3072_00125	108483_3074_00739	108486_3077_01156	108491_3082_00807	108492_3083_00856	108494_3085_00467	108498_3089_00511	108504_3095_00106	108508_3099_00811	108524_3325_00208	108528_3330_00854	108546_3348_00752	112371_CAM000139_1663_00924
g01232_00005__g01232	prpC	2-methylcitrate synthase	460	0	1	23	3	NA	NA		prpC(465)	126	1128	105577_PA010_00850	105578_PA017_00570	105579_PA026_00172	105580_PA028_00324	105581_PA029_00501	105583_PA031_01565	105584_PA032_00500	105585_PA033_00261	105586_PA034_00929	105587_PA040_00332;105587_PA040_00333	105590_PA048_00316	105593_PA061_00460	105594_PA062_00536	105597_PA065_00162	105601_PA070_00611	105614_PA093_00441	105616_PV004_00983	105636_PV086_01476	105640_PV091_00016	105642_PV093_00016	105746_cerdo_0_1_C1_00932	105747_cerdo_0_1_C2_00895	108479_3070_00099	108481_3072_00126	108483_3074_00738	108486_3077_01157	108491_3082_00806	108492_3083_00857	108494_3085_00468	108498_3089_00512	108504_3095_00105	108508_3099_00812	108524_3325_00207	108528_3330_00855	108546_3348_00751	112371_CAM000139_1663_00925
g01448_1_00005__g01448_1	prpD	2-methylcitrate dehydratase	460	0	1	23	4	NA	NA		prpD(459):mmgE(1)	237	1455	105577_PA010_00851	105578_PA017_00569	105579_PA026_00173	105580_PA028_00323	105581_PA029_00502	105583_PA031_00404	105584_PA032_00501	105585_PA033_00262	105586_PA034_00930	105587_PA040_00331	105590_PA048_00315	105593_PA061_00461	105594_PA062_00537	105597_PA065_00161	105601_PA070_00610	105614_PA093_00442	105616_PV004_00984	105636_PV086_01475	105640_PV091_00017	105642_PV093_00017	105746_cerdo_0_1_C1_00933	105747_cerdo_0_1_C2_00894	108479_3070_00100	108481_3072_00127	108483_3074_00737	108486_3077_01158	108491_3082_00805	108492_3083_00858	108494_3085_00469	108498_3089_00513	108504_3095_00104	108508_3099_00813	108524_3325_00206	108528_3330_00856	108546_3348_00750	112371_CAM000139_1663_00926
g01476_00005__g01476	menF	Isochorismate synthase MenF	460	0	1	24	1	NA	NA		menF(446):trpE(13):NA(1):pabB(1)	351	1242	105577_PA010_00335	105578_PA017_00486	105579_PA026_00251	105580_PA028_00245	105581_PA029_00775	105583_PA031_00331	105584_PA032_00372	105585_PA033_00335	105586_PA034_00632	105587_PA040_00253	105590_PA048_00237	105593_PA061_00793	105594_PA062_01224	105597_PA065_00083	105601_PA070_00532	105614_PA093_00362	105616_PV004_00446	105636_PV086_01399	105640_PV091_00095	105642_PV093_00097	105746_cerdo_0_1_C1_01014	105747_cerdo_0_1_C2_00813	108479_3070_00181	108481_3072_01306	108483_3074_01247	108486_3077_01611	108491_3082_00204	108492_3083_01018	108494_3085_00906	108498_3089_01170	108504_3095_01027	108508_3099_00652	108524_3325_00309	108528_3330_00718	108546_3348_00236	112371_CAM000139_1663_01004
g01797_00005__g01797	trpGD	Bifunctional protein TrpGD	460	0	1	24	2	NA	NA		trpGD(457):trpD(3):trpD2(1)	360	1593	105577_PA010_00334	105578_PA017_00485	105579_PA026_00252	105580_PA028_00244	105581_PA029_00774	105583_PA031_00330	105584_PA032_00371	105585_PA033_00336	105586_PA034_00631	105587_PA040_00252	105590_PA048_00236	105593_PA061_00792	105594_PA062_01223	105597_PA065_00082	105601_PA070_00531	105614_PA093_00361	105616_PV004_00445	105636_PV086_01398	105640_PV091_00096	105642_PV093_00098	105746_cerdo_0_1_C1_01015	105747_cerdo_0_1_C2_00812	108479_3070_00182	108481_3072_01305	108483_3074_01248	108486_3077_01110	108491_3082_00203	108492_3083_01019	108494_3085_00907	108498_3089_01169	108504_3095_01028	108508_3099_00653	108524_3325_00308	108528_3330_00717	108546_3348_00235	112371_CAM000139_1663_01005
g00701_00005__g00701	trpC	Tryptophan biosynthesis protein TrpCF	460	0	1	24	3	NA	NA		trpC(391):trpF(69)	363	600	105577_PA010_00333	105578_PA017_00484	105579_PA026_00253	105580_PA028_00243	105581_PA029_00773	105583_PA031_00329	105584_PA032_00370	105585_PA033_00337	105586_PA034_00630	105587_PA040_00251	105590_PA048_00235	105593_PA061_00791	105594_PA062_01222	105597_PA065_00081	105601_PA070_00530	105614_PA093_00360	105616_PV004_00444	105636_PV086_01397	105640_PV091_00097	105642_PV093_00099	105746_cerdo_0_1_C1_01016	105747_cerdo_0_1_C2_00811	108479_3070_00183	108481_3072_01304	108483_3074_01249	108486_3077_01111	108491_3082_00202	108492_3083_01020	108494_3085_00908	108498_3089_01168	108504_3095_01029	108508_3099_00654	108524_3325_00307	108528_3330_00716	108546_3348_00234	112371_CAM000139_1663_01006
g00954_1_00008__g00954_1	trpB	Tryptophan synthase beta chain	460	0	1	24	4	NA	NA		trpB(460)	1179	1179	105577_PA010_00332	105578_PA017_00483	105579_PA026_00254	105580_PA028_00242	105581_PA029_00772	105583_PA031_00328	105584_PA032_00369	105585_PA033_00338	105586_PA034_00629	105587_PA040_00250	105590_PA048_00234	105593_PA061_00790	105594_PA062_01221	105597_PA065_00080	105601_PA070_00529	105614_PA093_00359	105616_PV004_00443	105636_PV086_01396	105640_PV091_00098	105642_PV093_00100	105746_cerdo_0_1_C1_01017	105747_cerdo_0_1_C2_00810	108479_3070_00184	108481_3072_01303	108483_3074_01250	108486_3077_01112	108491_3082_00201	108492_3083_01021	108494_3085_00909	108498_3089_01167	108504_3095_01030	108508_3099_00655	108524_3325_00306	108528_3330_00715	108546_3348_00233	112371_CAM000139_1663_01007
g00914_00005__g00914	NA	hypothetical protein	460	0	1	25	1	NA	NA		NA(463)	126	1461	105577_PA010_00752	105578_PA017_01119	105579_PA026_00948	105580_PA028_01382	105581_PA029_01269	105583_PA031_00972	105584_PA032_01635	105585_PA033_01488	105586_PA034_00899	105587_PA040_01559	105590_PA048_01471	105593_PA061_01444	105594_PA062_01095	105597_PA065_01439	105601_PA070_01324	105614_PA093_01612	105616_PV004_01322	105636_PV086_01551	105640_PV091_00567	105642_PV093_01518	105746_cerdo_0_1_C1_01581	105747_cerdo_0_1_C2_01614	108479_3070_01112	108481_3072_01521	108483_3074_01429	108486_3077_01127	108491_3082_01035	108492_3083_01101	108494_3085_00538	108498_3089_01519	108504_3095_00984	108508_3099_00715	108524_3325_01059	108528_3330_00953	108546_3348_01327	112371_CAM000139_1663_01425
g02292_00006__g02292	purD	Phosphoribosylamine--glycine ligase	460	0	1	25	2	NA	NA		purD(461)	267	1251	105577_PA010_00751	105578_PA017_01118	105579_PA026_00947	105580_PA028_01381	105581_PA029_01268	105583_PA031_00973	105584_PA032_01636	105585_PA033_01489	105586_PA034_00898	105587_PA040_01560	105590_PA048_01472	105593_PA061_01443	105594_PA062_01094	105597_PA065_01440	105601_PA070_01323	105614_PA093_01613	105616_PV004_01323	105636_PV086_01550	105640_PV091_00566	105642_PV093_01517	105746_cerdo_0_1_C1_01582	105747_cerdo_0_1_C2_01613	108479_3070_01111	108481_3072_01520	108483_3074_01428	108486_3077_01126	108491_3082_01036	108492_3083_01102	108494_3085_00539	108498_3089_01518	108504_3095_00983	108508_3099_00716	108524_3325_01058	108528_3330_00954	108546_3348_01328	112371_CAM000139_1663_01424
g02073_00005__g02073	NA	hypothetical protein	460	0	1	25	3	NA	NA		NA(460)	453	453	105577_PA010_00750	105578_PA017_01117	105579_PA026_00946	105580_PA028_01380	105581_PA029_01267	105583_PA031_00974	105584_PA032_01637	105585_PA033_01490	105586_PA034_00897	105587_PA040_01561	105590_PA048_01473	105593_PA061_01442	105594_PA062_01093	105597_PA065_01441	105601_PA070_01322	105614_PA093_01614	105616_PV004_01324	105636_PV086_01549	105640_PV091_00565	105642_PV093_01516	105746_cerdo_0_1_C1_01583	105747_cerdo_0_1_C2_01612	108479_3070_01110	108481_3072_01519	108483_3074_01427	108486_3077_01125	108491_3082_01037	108492_3083_01103	108494_3085_00540	108498_3089_01517	108504_3095_00982	108508_3099_00717	108524_3325_01057	108528_3330_00955	108546_3348_01329	112371_CAM000139_1663_01423
g01208_00005__g01208	lptD	LPS-assembly protein LptD	460	0	1	25	4	NA	NA		lptD(457):NA(4)	366	2049	105577_PA010_00749	105578_PA017_01116	105579_PA026_00945	105580_PA028_01379	105581_PA029_01266	105583_PA031_00975	105584_PA032_01638	105585_PA033_01491	105586_PA034_00896	105587_PA040_01562	105590_PA048_01474	105593_PA061_01441	105594_PA062_01092	105597_PA065_01442	105601_PA070_01321	105614_PA093_01615	105616_PV004_01325	105636_PV086_01548	105640_PV091_00564	105642_PV093_01515	105746_cerdo_0_1_C1_01584	105747_cerdo_0_1_C2_01611	108479_3070_00496	108481_3072_01518	108483_3074_01426	108486_3077_01124	108491_3082_01038	108492_3083_01104	108494_3085_00541	108498_3089_01516	108504_3095_00981	108508_3099_00718	108524_3325_01056	108528_3330_01224	108546_3348_01364	112371_CAM000139_1663_01422
g01816_00005__g01816	mqo	Malate:quinone oxidoreductase	460	0	1	26	1	NA	NA		mqo(461)	327	1347	105577_PA010_00287	105578_PA017_00439	105579_PA026_01107	105580_PA028_00198	105581_PA029_01436	105583_PA031_01229	105584_PA032_00325	105585_PA033_00772	105586_PA034_00585	105587_PA040_00206	105590_PA048_00190	105593_PA061_00746	105594_PA062_01286	105597_PA065_00036	105601_PA070_00485	105614_PA093_00315	105616_PV004_01017	105636_PV086_01614	105640_PV091_00142	105642_PV093_00144	105746_cerdo_0_1_C1_01061	105747_cerdo_0_1_C2_00766	108479_3070_00684	108481_3072_00794	108483_3074_00375	108486_3077_00884	108491_3082_00181	108492_3083_00099	108494_3085_00270	108498_3089_00680	108504_3095_00727	108508_3099_00530	108524_3325_00553	108528_3330_00672	108546_3348_00424	112371_CAM000139_1663_01051
g01163_1_00008__g01163_1	pyk	Pyruvate kinase	460	0	1	26	2	NA	NA		pyk(460)	717	1443	105577_PA010_00288	105578_PA017_00440	105579_PA026_01108	105580_PA028_00199	105581_PA029_01437	105583_PA031_01230	105584_PA032_00326	105585_PA033_00773	105586_PA034_00586	105587_PA040_00207	105590_PA048_00191	105593_PA061_00747	105594_PA062_01287	105597_PA065_00037	105601_PA070_00486	105614_PA093_00316	105616_PV004_01018	105636_PV086_01615	105640_PV091_00141	105642_PV093_00143	105746_cerdo_0_1_C1_01060	105747_cerdo_0_1_C2_00767	108479_3070_00685	108481_3072_00795	108483_3074_00374	108486_3077_00885	108491_3082_00182	108492_3083_00100	108494_3085_00271	108498_3089_00681	108504_3095_00728	108508_3099_00531	108524_3325_00554	108528_3330_00671	108546_3348_00425	112371_CAM000139_1663_01050
g01635_00005__g01635	NA	hypothetical protein	460	0	1	26	3	NA	NA		NA(460)	615	627	105577_PA010_00289	105578_PA017_00441	105579_PA026_01109	105580_PA028_00200	105581_PA029_01438	105583_PA031_01231	105584_PA032_00327	105585_PA033_00774	105586_PA034_00587	105587_PA040_00208	105590_PA048_00192	105593_PA061_00748	105594_PA062_01288	105597_PA065_00038	105601_PA070_00487	105614_PA093_00317	105616_PV004_01019	105636_PV086_01616	105640_PV091_00140	105642_PV093_00142	105746_cerdo_0_1_C1_01059	105747_cerdo_0_1_C2_00768	108479_3070_00686	108481_3072_00796	108483_3074_00373	108486_3077_00886	108491_3082_00183	108492_3083_00101	108494_3085_00272	108498_3089_00682	108504_3095_00729	108508_3099_00532	108524_3325_00555	108528_3330_00670	108546_3348_00426	112371_CAM000139_1663_01049
g01486_00004__g01486	NA	hypothetical protein	460	0	1	26	4	NA	NA		NA(462)	567	2463	105577_PA010_00290	105578_PA017_00442	105579_PA026_01110	105580_PA028_00201	105581_PA029_01439	105583_PA031_01232	105584_PA032_00328	105585_PA033_00775	105586_PA034_00588	105587_PA040_00209	105590_PA048_00193	105593_PA061_00749	105594_PA062_01289	105597_PA065_00039	105601_PA070_00488	105614_PA093_00318	105616_PV004_01020	105636_PV086_01617	105640_PV091_00139	105642_PV093_00141	105746_cerdo_0_1_C1_01058	105747_cerdo_0_1_C2_00769	108479_3070_00687	108481_3072_00797	108483_3074_00372	108486_3077_00887	108491_3082_00184	108492_3083_00102	108494_3085_00273	108498_3089_00683	108504_3095_00730	108508_3099_00533	108524_3325_00556	108528_3330_00669	108546_3348_00427	112371_CAM000139_1663_01048
g01667_00005__g01667	nuoJ	hypothetical protein	460	0	1	27	1	NA	NA		NA(252):nuoJ(208)	516	516	105577_PA010_01433	105578_PA017_00584	105579_PA026_01592	105580_PA028_01427	105581_PA029_00626	105583_PA031_01508	105584_PA032_00711	105585_PA033_01011	105586_PA034_01529	105587_PA040_01056	105590_PA048_01006	105593_PA061_00544	105594_PA062_01532	105597_PA065_00623	105601_PA070_00908	105614_PA093_00160	105616_PV004_00146	105636_PV086_00734	105640_PV091_00355	105642_PV093_01591	105746_cerdo_0_1_C1_00903	105747_cerdo_0_1_C2_00924	108479_3070_01008	108481_3072_01399	108483_3074_00759	108486_3077_00643	108491_3082_00511	108492_3083_00873	108494_3085_00283	108498_3089_00181	108504_3095_00813	108508_3099_01226	108524_3325_00269	108528_3330_00721	108546_3348_00585	112371_CAM000139_1663_01220
g01734_00005__g01734	nuoK	NADH-quinone oxidoreductase subunit K	460	0	1	27	2	NA	NA		nuoK(460)	294	294	105577_PA010_01432	105578_PA017_00583	105579_PA026_01591	105580_PA028_01426	105581_PA029_00625	105583_PA031_01507	105584_PA032_00710	105585_PA033_01010	105586_PA034_01528	105587_PA040_01055	105590_PA048_01005	105593_PA061_00543	105594_PA062_01531	105597_PA065_00622	105601_PA070_00907	105614_PA093_00159	105616_PV004_00145	105636_PV086_00733	105640_PV091_00354	105642_PV093_01590	105746_cerdo_0_1_C1_00904	105747_cerdo_0_1_C2_00923	108479_3070_01007	108481_3072_01400	108483_3074_00758	108486_3077_00644	108491_3082_00510	108492_3083_00874	108494_3085_00282	108498_3089_00182	108504_3095_00812	108508_3099_01227	108524_3325_00268	108528_3330_00722	108546_3348_00584	112371_CAM000139_1663_01221
g00745_1_00006__g00745_1	nuoL	NADH-quinone oxidoreductase subunit L	460	0	1	27	3	NA	NA		nuoL(396):ndhB(63):NA(2)	330	1791	105577_PA010_01431	105578_PA017_00582	105579_PA026_01590	105580_PA028_01425	105581_PA029_00624	105583_PA031_01506	105584_PA032_00709	105585_PA033_01009	105586_PA034_01527	105587_PA040_01054	105590_PA048_01004	105593_PA061_00542	105594_PA062_01530	105597_PA065_00621	105601_PA070_00906	105614_PA093_00158	105616_PV004_00144	105636_PV086_00732	105640_PV091_00353	105642_PV093_01589	105746_cerdo_0_1_C1_00905	105747_cerdo_0_1_C2_00922	108479_3070_01006	108481_3072_01401	108483_3074_00757	108486_3077_00645	108491_3082_00509	108492_3083_00875	108494_3085_00281	108498_3089_00183	108504_3095_00811	108508_3099_01228	108524_3325_00267	108528_3330_00723	108546_3348_00583	112371_CAM000139_1663_01222
g01936_00005__g01936	ccoP	Cbb3-type cytochrome c oxidase subunit CcoP	460	0	1	28	1	NA	NA		ccoP(460)	864	864	105577_PA010_00502	105578_PA017_00953	105579_PA026_00461	105580_PA028_00999	105581_PA029_00591	105583_PA031_01400	105584_PA032_00294	105585_PA033_00703	105586_PA034_00432	105587_PA040_00609	105590_PA048_00829	105593_PA061_00664	105594_PA062_00410	105597_PA065_00382	105601_PA070_00333	105614_PA093_00630	105616_PV004_01293	105636_PV086_00962	105640_PV091_00698	105642_PV093_00714	105746_cerdo_0_1_C1_01488	105747_cerdo_0_1_C2_01538	108479_3070_01184	108481_3072_00516	108483_3074_00696	108486_3077_00307	108491_3082_01070	108492_3083_00893	108494_3085_00676	108498_3089_01009	108504_3095_01317	108508_3099_00605	108524_3325_00007	108528_3330_00465	108546_3348_00564	112371_CAM000139_1663_00779
g00029_00006__g00029	NA	hypothetical protein	460	0	1	28	2	NA	NA		NA(460)	222	222	105577_PA010_00503	105578_PA017_00954	105579_PA026_00462	105580_PA028_01000	105581_PA029_00592	105583_PA031_01401	105584_PA032_00295	105585_PA033_00704	105586_PA034_00433	105587_PA040_00610	105590_PA048_00830	105593_PA061_00665	105594_PA062_00411	105597_PA065_00383	105601_PA070_00334	105614_PA093_00631	105616_PV004_01294	105636_PV086_00963	105640_PV091_00697	105642_PV093_00715	105746_cerdo_0_1_C1_01487	105747_cerdo_0_1_C2_01539	108479_3070_01185	108481_3072_00515	108483_3074_00695	108486_3077_00306	108491_3082_01069	108492_3083_00894	108494_3085_00677	108498_3089_01010	108504_3095_01318	108508_3099_00606	108524_3325_00006	108528_3330_00464	108546_3348_00563	112371_CAM000139_1663_00780
g02017_00005__g02017	NA	hypothetical protein	460	0	1	28	3	NA	NA		NA(460)	345	591	105577_PA010_00505	105578_PA017_00956	105579_PA026_00464	105580_PA028_01002	105581_PA029_00594	105583_PA031_01403	105584_PA032_00297	105585_PA033_00706	105586_PA034_00435	105587_PA040_00612	105590_PA048_00832	105593_PA061_00667	105594_PA062_00413	105597_PA065_00385	105601_PA070_00336	105614_PA093_00633	105616_PV004_01296	105636_PV086_00965	105640_PV091_00695	105642_PV093_00717	105746_cerdo_0_1_C1_01485	105747_cerdo_0_1_C2_01541	108479_3070_01187	108481_3072_00513	108483_3074_00693	108486_3077_00304	108491_3082_01067	108492_3083_00896	108494_3085_00679	108498_3089_01012	108504_3095_01320	108508_3099_00608	108524_3325_00004	108528_3330_00462	108546_3348_00561	112371_CAM000139_1663_00782
g01503_00005__g01503	yfbR	hypothetical protein	460	0	1	29	1	NA	NA		NA(266):yfbR(194)	588	1227	105577_PA010_00013	105578_PA017_00746	105579_PA026_00297	105580_PA028_01488	105581_PA029_00013	105583_PA031_00756	105584_PA032_01526	105585_PA033_00013	105586_PA034_00797	105587_PA040_01127	105590_PA048_00646	105593_PA061_00013	105594_PA062_00715	105597_PA065_00496	105601_PA070_00775	105614_PA093_01119	105616_PV004_01120	105636_PV086_01024	105640_PV091_01193	105642_PV093_01003	105746_cerdo_0_1_C1_01111	105747_cerdo_0_1_C2_01088	108479_3070_00941	108481_3072_00961	108483_3074_00922	108486_3077_00720	108491_3082_00261	108492_3083_01211	108494_3085_00178	108498_3089_00717	108504_3095_00411	108508_3099_00230	108524_3325_00188	108528_3330_00131	108546_3348_01436	112371_CAM000139_1663_01354
g00574_00004__g00574	queC	7-cyano-7-deazaguanine synthase	460	0	1	29	2	NA	NA		queC(460)	633	687	105577_PA010_00012	105578_PA017_00745	105579_PA026_00296	105580_PA028_01487	105581_PA029_00012	105583_PA031_00755	105584_PA032_01527	105585_PA033_00012	105586_PA034_00798	105587_PA040_01126	105590_PA048_00645	105593_PA061_00012	105594_PA062_00714	105597_PA065_00495	105601_PA070_00774	105614_PA093_01118	105616_PV004_01119	105636_PV086_01023	105640_PV091_01192	105642_PV093_01002	105746_cerdo_0_1_C1_01110	105747_cerdo_0_1_C2_01087	108479_3070_00942	108481_3072_00960	108483_3074_00921	108486_3077_00721	108491_3082_00260	108492_3083_01210	108494_3085_00179	108498_3089_00716	108504_3095_00410	108508_3099_00231	108524_3325_00189	108528_3330_00132	108546_3348_01402	112371_CAM000139_1663_01355
g00288_00005__g00288	NA	hypothetical protein	460	0	1	29	3	NA	NA		NA(461)	360	1527	105577_PA010_00011	105578_PA017_00744	105579_PA026_00295	105580_PA028_01486	105581_PA029_00011	105583_PA031_00754	105584_PA032_01528	105585_PA033_00011	105586_PA034_00799	105587_PA040_01125	105590_PA048_00644	105593_PA061_00011	105594_PA062_00713	105597_PA065_00494	105601_PA070_00773	105614_PA093_01117	105616_PV004_01118	105636_PV086_01021	105640_PV091_01191	105642_PV093_01001	105746_cerdo_0_1_C1_01109	105747_cerdo_0_1_C2_01086	108479_3070_00944	108481_3072_00958	108483_3074_00919	108486_3077_00723	108491_3082_00258	108492_3083_01208	108494_3085_00180	108498_3089_00715	108504_3095_00409	108508_3099_00232	108524_3325_00190	108528_3330_00133	108546_3348_01401	112371_CAM000139_1663_01356
g00006_00006__g00006	nusG	Transcription termination/antitermination protein NusG	460	0	1	30	1	NA	NA		nusG(460)	534	534	105577_PA010_00168	105578_PA017_00361	105579_PA026_01031	105580_PA028_00532	105581_PA029_00268	105583_PA031_00579	105584_PA032_00124	105585_PA033_00972	105586_PA034_00221	105587_PA040_00127	105590_PA048_00528	105593_PA061_01110	105594_PA062_00042	105597_PA065_00792	105601_PA070_00659	105614_PA093_00122	105616_PV004_00391	105636_PV086_00471	105640_PV091_00302	105642_PV093_00527	105746_cerdo_0_1_C1_00498	105747_cerdo_0_1_C2_00685	108479_3070_00585	108481_3072_00083	108483_3074_00068	108486_3077_00084	108491_3082_00613	108492_3083_00507	108494_3085_00737	108498_3089_00069	108504_3095_00350	108508_3099_00339	108524_3325_00494	108528_3330_00033	108546_3348_00095	112371_CAM000139_1663_00662
g00022_00006__g00022	rplK	50S ribosomal protein L11	460	0	1	30	2	NA	NA		rplK(460)	426	426	105577_PA010_00169	105578_PA017_00360	105579_PA026_01030	105580_PA028_00533	105581_PA029_00269	105583_PA031_00578	105584_PA032_00123	105585_PA033_00971	105586_PA034_00220	105587_PA040_00126	105590_PA048_00529	105593_PA061_01109	105594_PA062_00043	105597_PA065_00793	105601_PA070_00660	105614_PA093_00121	105616_PV004_00390	105636_PV086_00472	105640_PV091_00301	105642_PV093_00528	105746_cerdo_0_1_C1_00499	105747_cerdo_0_1_C2_00684	108479_3070_00584	108481_3072_00082	108483_3074_00067	108486_3077_00083	108491_3082_00612	108492_3083_00506	108494_3085_00738	108498_3089_00068	108504_3095_00349	108508_3099_00338	108524_3325_00495	108528_3330_00034	108546_3348_00094	112371_CAM000139_1663_00661
g01608_1_00009__g01608_1	rplA	50S ribosomal protein L1	460	0	1	30	3	NA	NA		rplA(460)	702	702	105577_PA010_00170	105578_PA017_00359	105579_PA026_01029	105580_PA028_00534	105581_PA029_00270	105583_PA031_00577	105584_PA032_00122	105585_PA033_00970	105586_PA034_00219	105587_PA040_00125	105590_PA048_00530	105593_PA061_01108	105594_PA062_00044	105597_PA065_00794	105601_PA070_00661	105614_PA093_00120	105616_PV004_00389	105636_PV086_00473	105640_PV091_00300	105642_PV093_00529	105746_cerdo_0_1_C1_00500	105747_cerdo_0_1_C2_00683	108479_3070_00583	108481_3072_00081	108483_3074_00066	108486_3077_00082	108491_3082_00611	108492_3083_00505	108494_3085_00739	108498_3089_00067	108504_3095_00348	108508_3099_00337	108524_3325_00496	108528_3330_00035	108546_3348_00093	112371_CAM000139_1663_00660
g01593_00005__g01593	ttcA	tRNA-cytidine(32) 2-sulfurtransferase	460	0	1	31	1	NA	NA		ttcA(461)	288	762	105577_PA010_00113	105578_PA017_00847	105579_PA026_00397	105580_PA028_00888	105581_PA029_00113	105583_PA031_00473	105584_PA032_00462	105585_PA033_00115	105586_PA034_00545	105587_PA040_01229	105590_PA048_00746	105593_PA061_00113	105594_PA062_00286	105597_PA065_00596	105601_PA070_00875	105614_PA093_00892	105616_PV004_00918	105636_PV086_01124	105640_PV091_01015	105642_PV093_00827	105746_cerdo_0_1_C1_01225	105747_cerdo_0_1_C2_01202	108479_3070_00365	108481_3072_00879	108483_3074_00341	108486_3077_00061	108491_3082_00104	108492_3083_00125	108494_3085_00146	108498_3089_00312	108504_3095_00762	108508_3099_00762	108524_3325_00335	108528_3330_01061	108546_3348_00329	112371_CAM000139_1663_01254
g00584_00003__g00584	NA	hypothetical protein	460	0	1	31	2	NA	NA		NA(461)	288	522	105577_PA010_00114	105578_PA017_00848	105579_PA026_00398	105580_PA028_00889	105581_PA029_00114	105583_PA031_00474;105583_PA031_01939	105584_PA032_00463	105585_PA033_00116	105586_PA034_00546	105587_PA040_01230	105590_PA048_00747	105593_PA061_00114	105594_PA062_00287	105597_PA065_00597	105601_PA070_00876	105614_PA093_00893	105616_PV004_00919	105636_PV086_01125	105640_PV091_01016	105642_PV093_00828	105746_cerdo_0_1_C1_01226	105747_cerdo_0_1_C2_01203	108479_3070_00364	108481_3072_00878	108483_3074_00342	108486_3077_00062	108491_3082_00103	108492_3083_00124	108494_3085_00147	108498_3089_00313	108504_3095_00761	108508_3099_00763	108524_3325_00336	108528_3330_01060	108546_3348_00330	112371_CAM000139_1663_01253
g01056_00004__g01056	NA	hypothetical protein	460	0	1	31	3	NA	NA		NA(460)	420	615	105577_PA010_00115	105578_PA017_00849	105579_PA026_00399	105580_PA028_00890	105581_PA029_00115	105583_PA031_00475	105584_PA032_00464	105585_PA033_00117	105586_PA034_00547	105587_PA040_01231	105590_PA048_00748	105593_PA061_00115	105594_PA062_00288	105597_PA065_00598	105601_PA070_00877	105614_PA093_00894	105616_PV004_00920	105636_PV086_01126	105640_PV091_01017	105642_PV093_00829	105746_cerdo_0_1_C1_01227	105747_cerdo_0_1_C2_01204	108479_3070_00363	108481_3072_00877	108483_3074_00343	108486_3077_00063	108491_3082_00102	108492_3083_00123	108494_3085_00148	108498_3089_00314	108504_3095_00760	108508_3099_00764	108524_3325_00337	108528_3330_01059	108546_3348_00331	112371_CAM000139_1663_01252
g00970_1_00005__g00970_1	ilvC	Ketol-acid reductoisomerase (NADP(+))	460	0	1	32	1	NA	NA		ilvC(460)	282	1023	105577_PA010_00825	105578_PA017_01308	105579_PA026_00594	105580_PA028_00413	105581_PA029_00407	105583_PA031_00227	105584_PA032_00243	105585_PA033_00442	105586_PA034_00087	105587_PA040_00460	105590_PA048_00418	105593_PA061_00433	105594_PA062_00210	105597_PA065_00264	105601_PA070_01250	105614_PA093_00584	105616_PV004_00087	105636_PV086_00675	105640_PV091_01111	105642_PV093_00666	105746_cerdo_0_1_C1_00634	105747_cerdo_0_1_C2_00549	108479_3070_00087	108481_3072_01075	108483_3074_00430	108486_3077_00653	108491_3082_00639	108492_3083_00681	108494_3085_00346	108498_3089_00996	108504_3095_00143	108508_3099_01064	108524_3325_00609	108528_3330_01305	108546_3348_00549	112371_CAM000139_1663_00528
g00656_00002__g00656	NA	hypothetical protein	460	0	1	32	2	NA	NA		NA(461)	318	1083	105577_PA010_00824	105578_PA017_01307	105579_PA026_00593	105580_PA028_00412	105581_PA029_00406	105583_PA031_00226;105583_PA031_01925	105584_PA032_00242	105585_PA033_00441	105586_PA034_00086	105587_PA040_00459	105590_PA048_00417	105593_PA061_00432	105594_PA062_00209	105597_PA065_00263	105601_PA070_01249	105614_PA093_00583	105616_PV004_00086	105636_PV086_00674	105640_PV091_01110	105642_PV093_00665	105746_cerdo_0_1_C1_00635	105747_cerdo_0_1_C2_00548	108479_3070_00086	108481_3072_01076	108483_3074_00429	108486_3077_00652	108491_3082_00640	108492_3083_00680	108494_3085_00347	108498_3089_00995	108504_3095_00142	108508_3099_01063	108524_3325_00608	108528_3330_01304	108546_3348_00548	112371_CAM000139_1663_00527
g00684_00003__g00684	NA	hypothetical protein	460	0	1	32	3	NA	NA		NA(460)	303	774	105577_PA010_00823	105578_PA017_01306	105579_PA026_00592	105580_PA028_00411	105581_PA029_00405	105583_PA031_00225	105584_PA032_00241	105585_PA033_00440	105586_PA034_00085	105587_PA040_00458	105590_PA048_00416	105593_PA061_00431	105594_PA062_00208	105597_PA065_00262	105601_PA070_01248	105614_PA093_00582	105616_PV004_00085	105636_PV086_00673	105640_PV091_01109	105642_PV093_00664	105746_cerdo_0_1_C1_00636	105747_cerdo_0_1_C2_00547	108479_3070_00085	108481_3072_01077	108483_3074_00428	108486_3077_00651	108491_3082_00641	108492_3083_00679	108494_3085_00348	108498_3089_00994	108504_3095_00141	108508_3099_01062	108524_3325_00607	108528_3330_01303	108546_3348_00547	112371_CAM000139_1663_00526
g00266_1_00007__g00266_1	nhaA	Na(+)/H(+) antiporter NhaA	460	0	1	33	1	NA	NA		nhaA(460)	318	1149	105577_PA010_00450	105578_PA017_00689	105579_PA026_00979	105580_PA028_00695	105581_PA029_01018	105583_PA031_00699	105584_PA032_01104	105585_PA033_01324	105586_PA034_00347	105587_PA040_00873	105590_PA048_01250	105593_PA061_00949	105594_PA062_01015	105597_PA065_00726	105601_PA070_01011	105614_PA093_00263	105616_PV004_00333	105636_PV086_00838	105640_PV091_00459	105642_PV093_00966	105746_cerdo_0_1_C1_00796	105747_cerdo_0_1_C2_01031	108479_3070_00276	108481_3072_01356	108483_3074_00632	108486_3077_00516	108491_3082_00467	108492_3083_00562	108494_3085_00652	108498_3089_00598	108504_3095_00179	108508_3099_00100	108524_3325_00584	108528_3330_00515	108546_3348_00902	112371_CAM000139_1663_01123
g00266_2_00006__g00266_2	nhaA	Na(+)/H(+) antiporter NhaA	460	0	1	33	2	NA	NA		nhaA(461)	258	1170	105577_PA010_00449	105578_PA017_00688	105579_PA026_00978	105580_PA028_00694	105581_PA029_01019	105583_PA031_00698	105584_PA032_01105	105585_PA033_01323	105586_PA034_00346	105587_PA040_00872	105590_PA048_01249	105593_PA061_00948	105594_PA062_01016	105597_PA065_00725	105601_PA070_01010	105614_PA093_00262	105616_PV004_00332	105636_PV086_00837	105640_PV091_00458	105642_PV093_00965	105746_cerdo_0_1_C1_00797	105747_cerdo_0_1_C2_01030	108479_3070_00275	108481_3072_01357	108483_3074_00631	108486_3077_00517	108491_3082_00466	108492_3083_00563	108494_3085_00653	108498_3089_00597	108504_3095_00180	108508_3099_00101	108524_3325_00583	108528_3330_00516	108546_3348_00901	112371_CAM000139_1663_01124
g00722_00003__g00722	mepS	hypothetical protein	460	0	1	33	3	NA	NA		NA(373):mepS(88)	159	465	105577_PA010_00448	105578_PA017_00687	105579_PA026_00977	105580_PA028_00693	105581_PA029_01020	105583_PA031_00697	105584_PA032_01106	105585_PA033_01322	105586_PA034_00345	105587_PA040_00871	105590_PA048_01248	105593_PA061_00947	105594_PA062_01017	105597_PA065_00724	105601_PA070_01009	105614_PA093_00261	105616_PV004_00331	105636_PV086_00836	105640_PV091_00457	105642_PV093_00964	105746_cerdo_0_1_C1_00798	105747_cerdo_0_1_C2_01029	108479_3070_00274	108481_3072_01358	108483_3074_00630	108486_3077_00518	108491_3082_00465	108492_3083_00564	108494_3085_00654	108498_3089_00596	108504_3095_00181	108508_3099_00102	108524_3325_00582	108528_3330_00517	108546_3348_00900	112371_CAM000139_1663_01125
g01197_1_00011__g01197_1	ileS	Isoleucine--tRNA ligase	460	0	1	34	1	NA	NA		ileS(458):NA(2)	264	2757	105577_PA010_01209	105578_PA017_00062	105579_PA026_00078	105580_PA028_00078	105581_PA029_00212	105583_PA031_01584	105584_PA032_00749	105585_PA033_00951	105586_PA034_01041	105587_PA040_00751	105590_PA048_00078	105593_PA061_01317	105594_PA062_01463	105597_PA065_01327	105601_PA070_00090	105614_PA093_00765	105616_PV004_00816	105636_PV086_00259	105640_PV091_01317	105642_PV093_00214	105746_cerdo_0_1_C1_00191	105747_cerdo_0_1_C2_00264	108479_3070_00890	108481_3072_01377	108483_3074_00814	108486_3077_00257	108491_3082_00912	108492_3083_01193	108494_3085_00388	108498_3089_00452	108504_3095_00973	108508_3099_00769	108524_3325_01177	108528_3330_00984	108546_3348_00190	112371_CAM000139_1663_00186
g00518_1_00008__g00518_1	gatA	Glutamyl-tRNA(Gln) amidotransferase subunit A	460	0	1	34	2	NA	NA		gatA(461)	243	1368	105577_PA010_01208	105578_PA017_00061	105579_PA026_00079	105580_PA028_00079	105581_PA029_00213	105583_PA031_01583	105584_PA032_00748	105585_PA033_00952	105586_PA034_01042	105587_PA040_00750	105590_PA048_00079	105593_PA061_01318	105594_PA062_01464	105597_PA065_01328	105601_PA070_00089	105614_PA093_00766	105616_PV004_00815	105636_PV086_00258	105640_PV091_01318	105642_PV093_00215	105746_cerdo_0_1_C1_00192	105747_cerdo_0_1_C2_00263	108479_3070_00889	108481_3072_01378	108483_3074_00815	108486_3077_00258	108491_3082_00911	108492_3083_01192	108494_3085_00387	108498_3089_00453	108504_3095_00972	108508_3099_00768	108524_3325_01178	108528_3330_00983	108546_3348_01412	112371_CAM000139_1663_00187
g00377_00005__g00377	guaB	Inosine-5'-monophosphate dehydrogenase	460	0	1	34	3	NA	NA		guaB(460):IMPDH(1)	333	1458	105577_PA010_01207	105578_PA017_00060	105579_PA026_00080	105580_PA028_00080	105581_PA029_00214	105583_PA031_01582	105584_PA032_00747	105585_PA033_00953	105586_PA034_01043	105587_PA040_00749	105590_PA048_00080	105593_PA061_01319	105594_PA062_01465	105597_PA065_01329	105601_PA070_00088	105614_PA093_00767	105616_PV004_00814	105636_PV086_00257	105640_PV091_01319	105642_PV093_00216	105746_cerdo_0_1_C1_00193	105747_cerdo_0_1_C2_00262	108479_3070_00888	108481_3072_01379	108483_3074_00816	108486_3077_00259	108491_3082_00910	108492_3083_01191	108494_3085_00386	108498_3089_00454	108504_3095_00971	108508_3099_00767	108524_3325_01179	108528_3330_00982	108546_3348_01411	112371_CAM000139_1663_00188
g00374_1_00006__g00374_1	dcuB	Anaerobic C4-dicarboxylate transporter DcuB	460	0	1.09	35	1	NA	NA		dcuB(501):NA(52)	132	1587	105577_PA010_00792	105578_PA017_01275	105579_PA026_00561	105580_PA028_00380	105581_PA029_00374	105583_PA031_00193;105583_PA031_00194	105584_PA032_00210	105585_PA033_00408;105585_PA033_00409	105586_PA034_00054	105587_PA040_00426;105587_PA040_00427	105590_PA048_00385	105593_PA061_00400	105594_PA062_00177	105597_PA065_00231	105601_PA070_01217	105614_PA093_00551	105616_PV004_00054	105636_PV086_00642	105640_PV091_01078	105642_PV093_00633	105746_cerdo_0_1_C1_00667	105747_cerdo_0_1_C2_00516	108479_3070_00054	108481_3072_00421	108483_3074_00397	108486_3077_00574	108491_3082_00762	108492_3083_01354	108494_3085_00449	108498_3089_01207	108504_3095_01349	108508_3099_00205	108524_3325_00126	108528_3330_00383;108528_3330_00384	108546_3348_00500	112371_CAM000139_1663_00495
g01850_00005__g01850	uvrB	UvrABC system protein B	460	0	1	35	2	NA	NA		uvrB(460)	738	1974	105577_PA010_00791	105578_PA017_01274	105579_PA026_00560	105580_PA028_00379	105581_PA029_00373	105583_PA031_00192	105584_PA032_00209	105585_PA033_00407	105586_PA034_00053	105587_PA040_00425	105590_PA048_00384	105593_PA061_00399	105594_PA062_00176	105597_PA065_00230	105601_PA070_01216	105614_PA093_00550	105616_PV004_00053	105636_PV086_00641	105640_PV091_01077	105642_PV093_00632	105746_cerdo_0_1_C1_00668	105747_cerdo_0_1_C2_00515	108479_3070_00053	108481_3072_00422	108483_3074_00396	108486_3077_00575	108491_3082_00763	108492_3083_01353	108494_3085_00450	108498_3089_01206	108504_3095_01348	108508_3099_00206	108524_3325_00125	108528_3330_00385	108546_3348_00501	112371_CAM000139_1663_00494
g00048_00006__g00048	NA	hypothetical protein	460	0	1	35	3	NA	NA		NA(460)	204	231	105577_PA010_00790	105578_PA017_01273	105579_PA026_00559	105580_PA028_00378	105581_PA029_00372	105583_PA031_00191	105584_PA032_00208	105585_PA033_00406	105586_PA034_00052	105587_PA040_00424	105590_PA048_00383	105593_PA061_00398	105594_PA062_00175	105597_PA065_00229	105601_PA070_01215	105614_PA093_00549	105616_PV004_00052	105636_PV086_00640	105640_PV091_01076	105642_PV093_00631	105746_cerdo_0_1_C1_00669	105747_cerdo_0_1_C2_00514	108479_3070_00052	108481_3072_00423	108483_3074_00395	108486_3077_00576	108491_3082_00764	108492_3083_01352	108494_3085_00451	108498_3089_01205	108504_3095_01347	108508_3099_00207	108524_3325_00124	108528_3330_00386	108546_3348_00502	112371_CAM000139_1663_00493
g01207_1_00006__g01207_1	btuD	Carboxynorspermidine synthase	460	0	1	36	1	NA	NA		NA(459):btuD(456)	465	2142	105577_PA010_01025;105577_PA010_01026	105578_PA017_01665;105578_PA017_01666	105579_PA026_01548;105579_PA026_01549	105580_PA028_01203;105580_PA028_01204	105581_PA029_01171;105581_PA029_01172	105583_PA031_00867;105583_PA031_00868	105584_PA032_00838;105584_PA032_00839	105585_PA033_01446;105585_PA033_01447	105586_PA034_01371;105586_PA034_01372	105587_PA040_00940;105587_PA040_00941	105590_PA048_01539;105590_PA048_01540	105593_PA061_01538;105593_PA061_01539	105594_PA062_00877;105594_PA062_00878	105597_PA065_01599;105597_PA065_01600	105601_PA070_01545;105601_PA070_01546	105614_PA093_01269;105614_PA093_01270	105616_PV004_00893;105616_PV004_00894	105636_PV086_01726;105636_PV086_01727	105640_PV091_01352;105640_PV091_01353	105642_PV093_01212;105642_PV093_01213	105746_cerdo_0_1_C1_01724;105746_cerdo_0_1_C1_01725	105747_cerdo_0_1_C2_01701;105747_cerdo_0_1_C2_01702	108479_3070_01530;108479_3070_01531	108481_3072_00701;108481_3072_00702	108483_3074_01595;108483_3074_01596	108486_3077_01465;108486_3077_01466	108491_3082_01363;108491_3082_01444	108492_3083_01246;108492_3083_01247	108494_3085_01191;108494_3085_01446	108498_3089_00962	108504_3095_00925	108508_3099_00439	108524_3325_01280;108524_3325_01281	108528_3330_01328;108528_3330_01329	108546_3348_00064;108546_3348_00065	112371_CAM000139_1663_01581;112371_CAM000139_1663_01582
g01623_00004__g01623	sodB	Superoxide dismutase [Fe]	460	0	1	36	2	NA	NA		sodB(460)	381	663	105577_PA010_01024	105578_PA017_01664	105579_PA026_01547	105580_PA028_01202	105581_PA029_01173	105583_PA031_00866	105584_PA032_00837	105585_PA033_01445	105586_PA034_01370	105587_PA040_00939	105590_PA048_01538	105593_PA061_01537	105594_PA062_00876	105597_PA065_01598	105601_PA070_01544	105614_PA093_01268	105616_PV004_00892	105636_PV086_01725	105640_PV091_01351	105642_PV093_01211	105746_cerdo_0_1_C1_01723	105747_cerdo_0_1_C2_01700	108479_3070_01529	108481_3072_00703	108483_3074_01597	108486_3077_01467	108491_3082_01445	108492_3083_01245	108494_3085_01445	108498_3089_00963	108504_3095_00924	108508_3099_00438	108524_3325_01282	108528_3330_01327	108546_3348_00063	112371_CAM000139_1663_01583
g01654_00004__g01654	mntP	putative manganese efflux pump MntP	460	0	1	36	3	NA	NA		mntP(460)	315	564	105577_PA010_01021	105578_PA017_01661	105579_PA026_01544	105580_PA028_01199	105581_PA029_01510	105583_PA031_00864	105584_PA032_00834	105585_PA033_01443	105586_PA034_01367	105587_PA040_00936	105590_PA048_01535	105593_PA061_01534	105594_PA062_00873	105597_PA065_01595	105601_PA070_01541	105614_PA093_01265	105616_PV004_00889	105636_PV086_01722	105640_PV091_01348	105642_PV093_01208	105746_cerdo_0_1_C1_01720	105747_cerdo_0_1_C2_01697	108479_3070_01263	108481_3072_00706	108483_3074_01086	108486_3077_00796	108491_3082_01183	108492_3083_00766	108494_3085_00777	108498_3089_00966	108504_3095_00921	108508_3099_00435	108524_3325_00706	108528_3330_00999	108546_3348_00060	112371_CAM000139_1663_01586
g01552_00005__g01552	cheV	Chemotaxis protein CheV	460	0	1	37	1	NA	NA		cheV(460)	792	957	105577_PA010_00866	105578_PA017_00554	105579_PA026_00183	105580_PA028_00313	105581_PA029_00512	105583_PA031_00394	105584_PA032_00513	105585_PA033_00272	105586_PA034_00942	105587_PA040_00319	105590_PA048_00305	105593_PA061_00471	105594_PA062_00547	105597_PA065_00151	105601_PA070_00600	105614_PA093_00455	105616_PV004_00999	105636_PV086_01463	105640_PV091_00028	105642_PV093_00030	105746_cerdo_0_1_C1_00945	105747_cerdo_0_1_C2_00882	108479_3070_00112	108481_3072_00139	108483_3074_00725	108486_3077_01013	108491_3082_00934	108492_3083_00724	108494_3085_00370	108498_3089_00524	108504_3095_00091	108508_3099_00825	108524_3325_00193	108528_3330_00929	108546_3348_00956	112371_CAM000139_1663_00937
g00941_00004__g00941	rcsC	Sensor histidine kinase RcsC	460	0	1	37	2	NA	NA		rcsC(459):NA(1):frzE(1)	264	2310	105577_PA010_00865	105578_PA017_00555	105579_PA026_00182	105580_PA028_00314	105581_PA029_00511	105583_PA031_00395	105584_PA032_00512	105585_PA033_00271	105586_PA034_00941	105587_PA040_00320	105590_PA048_00306	105593_PA061_00470	105594_PA062_00546	105597_PA065_00152	105601_PA070_00601	105614_PA093_00454	105616_PV004_00998	105636_PV086_01464	105640_PV091_00027	105642_PV093_00029	105746_cerdo_0_1_C1_00944	105747_cerdo_0_1_C2_00883	108479_3070_00111	108481_3072_00138	108483_3074_00726	108486_3077_01014	108491_3082_01375	108492_3083_00723	108494_3085_00369	108498_3089_00523	108504_3095_00092	108508_3099_00824	108524_3325_00194	108528_3330_00928	108546_3348_00955	112371_CAM000139_1663_00936
g01353_1_00008__g01353_1	cheW	Chemotaxis protein CheW	460	0	1	37	3	NA	NA		cheW(460)	522	522	105577_PA010_00864	105578_PA017_00556	105579_PA026_00181	105580_PA028_00315	105581_PA029_00510	105583_PA031_00396	105584_PA032_00511	105585_PA033_00270	105586_PA034_00940	105587_PA040_00321	105590_PA048_00307	105593_PA061_00469	105594_PA062_00545	105597_PA065_00153	105601_PA070_00602	105614_PA093_00453	105616_PV004_00997	105636_PV086_01465	105640_PV091_00026	105642_PV093_00028	105746_cerdo_0_1_C1_00943	105747_cerdo_0_1_C2_00884	108479_3070_00110	108481_3072_00137	108483_3074_00727	108486_3077_01015	108491_3082_01376	108492_3083_00722	108494_3085_00368	108498_3089_00522	108504_3095_00093	108508_3099_00823	108524_3325_00195	108528_3330_00927	108546_3348_00954	112371_CAM000139_1663_00935
g00964_00005__g00964	mqnE	Aminodeoxyfutalosine synthase	460	0	1	38	1	NA	NA		mqnE(460)	930	1065	105577_PA010_00592	105578_PA017_01195	105579_PA026_00659	105580_PA028_01177	105581_PA029_00843	105583_PA031_00503	105584_PA032_00567	105585_PA033_00804	105586_PA034_01107	105587_PA040_01340	105590_PA048_01223	105593_PA061_00316	105594_PA062_00359	105597_PA065_00483	105601_PA070_00434	105614_PA093_00965	105616_PV004_01619	105636_PV086_01196	105640_PV091_01134	105642_PV093_00458	105746_cerdo_0_1_C1_01281	105747_cerdo_0_1_C2_01258	108479_3070_01205	108481_3072_00728	108483_3074_00268	108486_3077_00813	108491_3082_00845	108492_3083_00066	108494_3085_00400	108498_3089_00235	108504_3095_01239	108508_3099_00413	108524_3325_00160	108528_3330_00337	108546_3348_00265	112371_CAM000139_1663_00878
g00628_00004__g00628	adeQ	Nucleobase transporter PlAzg1	460	0	1	38	2	NA	NA		NA(434):adeQ(28):adeP(1)	234	1320	105577_PA010_00591	105578_PA017_01194	105579_PA026_00658	105580_PA028_01176	105581_PA029_00842	105583_PA031_00504	105584_PA032_00568	105585_PA033_00805	105586_PA034_01106	105587_PA040_01341	105590_PA048_01222	105593_PA061_00315	105594_PA062_00358	105597_PA065_00482	105601_PA070_00433	105614_PA093_00964	105616_PV004_01618	105636_PV086_01195	105640_PV091_01135	105642_PV093_00457	105746_cerdo_0_1_C1_01282	105747_cerdo_0_1_C2_01259	108479_3070_01204	108481_3072_00729	108483_3074_00267	108486_3077_00814	108491_3082_00846	108492_3083_00067	108494_3085_00399	108498_3089_00234	108504_3095_01238	108508_3099_00411;108508_3099_00412	108524_3325_00161	108528_3330_00338	108546_3348_00264	112371_CAM000139_1663_00877
g00871_00004__g00871	gpt	Xanthine phosphoribosyltransferase	460	0	1	38	3	NA	NA		gpt(460)	441	444	105577_PA010_00590	105578_PA017_01193	105579_PA026_00657	105580_PA028_01175	105581_PA029_00841	105583_PA031_00505	105584_PA032_00569	105585_PA033_00806	105586_PA034_01105	105587_PA040_01342	105590_PA048_01221	105593_PA061_00314	105594_PA062_00357	105597_PA065_00481	105601_PA070_00432	105614_PA093_00963	105616_PV004_01617	105636_PV086_01194	105640_PV091_01136	105642_PV093_00456	105746_cerdo_0_1_C1_01283	105747_cerdo_0_1_C2_01260	108479_3070_01203	108481_3072_00730	108483_3074_00266	108486_3077_00815	108491_3082_00847	108492_3083_00068	108494_3085_00398	108498_3089_00233	108504_3095_01237	108508_3099_00410	108524_3325_00162	108528_3330_00339	108546_3348_00263	112371_CAM000139_1663_00876
g00792_00005__g00792	yycB	putative transporter YycB	460	0	1	39	1	NA	NA		yycB(455):nimT(5):NA(3)	330	1164	105577_PA010_00915	105578_PA017_00042	105579_PA026_00101	105580_PA028_00101	105581_PA029_01036	105583_PA031_01122	105584_PA032_00726	105585_PA033_01290	105586_PA034_00644	105587_PA040_01403	105590_PA048_00101	105593_PA061_01254	105594_PA062_01333	105597_PA065_01134	105601_PA070_00067	105614_PA093_00792	105616_PV004_00527	105636_PV086_00235	105640_PV091_00936	105642_PV093_00238	105746_cerdo_0_1_C1_00217	105747_cerdo_0_1_C2_00238	108479_3070_01446	108481_3072_01274	108483_3074_01169	108486_3077_00108	108491_3082_00371	108492_3083_00622	108494_3085_00121	108498_3089_00650	108504_3095_00033	108508_3099_00876	108524_3325_01183	108528_3330_00107	108546_3348_00821	112371_CAM000139_1663_00209
g01248_00005__g01248	murG	UDP-N-acetylglucosamine--N-acetylmuramyl-(pentapeptide) pyrophosphoryl-undecaprenol N-acetylglucosamine transferase	460	0	1	39	2	NA	NA		murG(460)	309	1017	105577_PA010_00916	105578_PA017_00041	105579_PA026_00102	105580_PA028_00102	105581_PA029_01037	105583_PA031_01121	105584_PA032_00725	105585_PA033_01289	105586_PA034_00645	105587_PA040_01402	105590_PA048_00102	105593_PA061_01255	105594_PA062_01332	105597_PA065_01135	105601_PA070_00066	105614_PA093_00793	105616_PV004_00528	105636_PV086_00234	105640_PV091_00935	105642_PV093_00239	105746_cerdo_0_1_C1_00218	105747_cerdo_0_1_C2_00237	108479_3070_01445	108481_3072_01275	108483_3074_01170	108486_3077_00109	108491_3082_00370	108492_3083_00623	108494_3085_00120	108498_3089_00649	108504_3095_00032	108508_3099_00877	108524_3325_01184	108528_3330_00108	108546_3348_00820	112371_CAM000139_1663_00210
g01512_1_00005__g01512_1	ftsW	putative peptidoglycan glycosyltransferase FtsW	460	0	1	39	3	NA	NA		ftsW(460)	324	1164	105577_PA010_00917	105578_PA017_00040	105579_PA026_00103	105580_PA028_00103	105581_PA029_01038	105583_PA031_01120	105584_PA032_00724	105585_PA033_01288	105586_PA034_00646	105587_PA040_01401	105590_PA048_00103	105593_PA061_01256	105594_PA062_01331	105597_PA065_01136	105601_PA070_00065	105614_PA093_00794	105616_PV004_00529	105636_PV086_00233	105640_PV091_00934	105642_PV093_00240	105746_cerdo_0_1_C1_00219	105747_cerdo_0_1_C2_00236	108479_3070_01444	108481_3072_01276	108483_3074_01171	108486_3077_00110	108491_3082_00369	108492_3083_00624	108494_3085_00119	108498_3089_00648	108504_3095_00031	108508_3099_00878	108524_3325_01185	108528_3330_00109	108546_3348_00819	112371_CAM000139_1663_00211
g00867_00003__g00867	folK	hypothetical protein	460	0	1	40	1	NA	NA		NA(431):folK(30):sulD(1)	318	483	105577_PA010_01487	105578_PA017_00725	105579_PA026_01015	105580_PA028_00731	105581_PA029_01463	105583_PA031_00732;105583_PA031_01967	105584_PA032_01302	105585_PA033_01628	105586_PA034_00383	105587_PA040_00906	105590_PA048_01286	105593_PA061_00985	105594_PA062_01518	105597_PA065_01711	105601_PA070_01732	105614_PA093_01546	105616_PV004_00369	105636_PV086_00874	105640_PV091_00495	105642_PV093_01544	105746_cerdo_0_1_C1_00760	105747_cerdo_0_1_C2_01067	108479_3070_01363	108481_3072_01562	108483_3074_01015	108486_3077_00860	108491_3082_01049	108492_3083_00475	108494_3085_00225	108498_3089_01142	108504_3095_00589	108508_3099_00799	108524_3325_00894	108528_3330_00551	108546_3348_00632	112371_CAM000139_1663_01087
g01682_00004__g01682	aroQ	3-dehydroquinate dehydratase	460	0	1	40	2	NA	NA		aroQ(460)	480	489	105577_PA010_01486	105578_PA017_00724	105579_PA026_01014	105580_PA028_00730	105581_PA029_01462	105583_PA031_00731	105584_PA032_01301	105585_PA033_01627	105586_PA034_00382	105587_PA040_00905	105590_PA048_01285	105593_PA061_00984	105594_PA062_01517	105597_PA065_01710	105601_PA070_01731	105614_PA093_01545	105616_PV004_00368	105636_PV086_00873	105640_PV091_00494	105642_PV093_01543	105746_cerdo_0_1_C1_00761	105747_cerdo_0_1_C2_01066	108479_3070_01362	108481_3072_01561	108483_3074_01016	108486_3077_00861	108491_3082_01048	108492_3083_00476	108494_3085_00224	108498_3089_01143	108504_3095_00590	108508_3099_00800	108524_3325_00895	108528_3330_00552	108546_3348_00631	112371_CAM000139_1663_01088
g00949_00003__g00949	NA	Aminodeoxyfutalosine deaminase	460	0	1	40	3	NA	NA		NA(460)	252	1230	105577_PA010_01485	105578_PA017_00723	105579_PA026_01013	105580_PA028_00729	105581_PA029_01461	105583_PA031_00730	105584_PA032_01300	105585_PA033_01626	105586_PA034_00381	105587_PA040_00904	105590_PA048_01284	105593_PA061_00983	105594_PA062_01516	105597_PA065_01709	105601_PA070_01730	105614_PA093_01544	105616_PV004_00367	105636_PV086_00872	105640_PV091_00493	105642_PV093_01542	105746_cerdo_0_1_C1_00762	105747_cerdo_0_1_C2_01065	108479_3070_01361	108481_3072_01560	108483_3074_01017	108486_3077_00862	108491_3082_01284	108492_3083_00477	108494_3085_00223	108498_3089_01144	108504_3095_00591	108508_3099_00801	108524_3325_00896	108528_3330_00553	108546_3348_00630	112371_CAM000139_1663_01089
g00807_00002__g00807	NA	hypothetical protein	460	0	1	41	1	NA	NA		NA(461)	285	987	105577_PA010_00121	105578_PA017_00854	105579_PA026_01459	105580_PA028_00895	105581_PA029_00120	105583_PA031_00483	105584_PA032_00469	105585_PA033_00125	105586_PA034_00552	105587_PA040_00985	105590_PA048_00753	105593_PA061_00120	105594_PA062_00293	105597_PA065_00603	105601_PA070_00882	105614_PA093_00900	105616_PV004_00926	105636_PV086_01131	105640_PV091_01022	105642_PV093_00834	105746_cerdo_0_1_C1_01233	105747_cerdo_0_1_C2_01210	108479_3070_00358	108481_3072_00872	108483_3074_01184	108486_3077_00711	108491_3082_01028	108492_3083_00118	108494_3085_01115	108498_3089_00319	108504_3095_00676	108508_3099_01335	108524_3325_01420	108528_3330_01443	108546_3348_01491	112371_CAM000139_1663_01247
g01554_00005__g01554	dusB	tRNA-dihydrouridine synthase B	460	0	1	41	2	NA	NA		dusB(460)	705	927	105577_PA010_00120	105578_PA017_00853	105579_PA026_01458	105580_PA028_00894	105581_PA029_00119	105583_PA031_00482	105584_PA032_00468	105585_PA033_00124	105586_PA034_00551	105587_PA040_00986	105590_PA048_00752	105593_PA061_00119	105594_PA062_00292	105597_PA065_00602	105601_PA070_00881	105614_PA093_00899	105616_PV004_00925	105636_PV086_01130	105640_PV091_01021	105642_PV093_00833	105746_cerdo_0_1_C1_01232	105747_cerdo_0_1_C2_01209	108479_3070_00359	108481_3072_00873	108483_3074_01183	108486_3077_00712	108491_3082_01027	108492_3083_00119	108494_3085_01114	108498_3089_00318	108504_3095_00677	108508_3099_01336	108524_3325_01421	108528_3330_01442	108546_3348_01490	112371_CAM000139_1663_01248
g00380_1_00009__g00380_1	uvrD	DNA helicase II	460	0	1	41	3	NA	NA		uvrD(458):rep(3)	231	2031	105577_PA010_01234	105578_PA017_01364	105579_PA026_00791	105580_PA028_00933	105581_PA029_00444	105583_PA031_01147	105584_PA032_01070	105585_PA033_00220	105586_PA034_00723	105587_PA040_01012	105590_PA048_00960	105593_PA061_00893	105594_PA062_00482	105597_PA065_01282	105601_PA070_01364	105614_PA093_00721	105616_PV004_00294	105636_PV086_01362	105640_PV091_00848	105642_PV093_00374	105746_cerdo_0_1_C1_01456	105747_cerdo_0_1_C2_01433	108479_3070_00470	108481_3072_00307	108483_3074_00464	108486_3077_01289	108491_3082_00232	108492_3083_00824	108494_3085_01262	108498_3089_01109	108504_3095_00342	108508_3099_00446	108524_3325_00548	108528_3330_01299	108546_3348_01342	112371_CAM000139_1663_01463
g01688_00004__g01688	accB	Biotin carboxyl carrier protein of acetyl-CoA carboxylase	460	0	1	42	1	NA	NA		accB(462)	165	456	105577_PA010_00705	105578_PA017_01072	105579_PA026_00899	105580_PA028_01417	105581_PA029_00927	105583_PA031_01099	105584_PA032_00872	105585_PA033_01098	105586_PA034_01492	105587_PA040_01684	105590_PA048_01393	105593_PA061_01551	105594_PA062_01057	105597_PA065_01079	105601_PA070_01275	105614_PA093_01077	105616_PV004_00506	105636_PV086_01505	105640_PV091_00520	105642_PV093_01172	105746_cerdo_0_1_C1_01629	105747_cerdo_0_1_C2_01566	108479_3070_00539	108481_3072_01121	108483_3074_00870	108486_3077_00778	108491_3082_00663	108492_3083_00709	108494_3085_00423	108498_3089_00779	108504_3095_00702	108508_3099_01125	108524_3325_00800	108528_3330_00581	108546_3348_00594	112371_CAM000139_1663_01378
g02659_00006__g02659	dcd	dCTP deaminase	460	0	1	42	2	NA	NA		dcd(461)	276	561	105577_PA010_00704	105578_PA017_01071	105579_PA026_00898	105580_PA028_01418	105581_PA029_00928	105583_PA031_01100	105584_PA032_00871	105585_PA033_01099	105586_PA034_01493	105587_PA040_01685	105590_PA048_01394	105593_PA061_01552	105594_PA062_01058	105597_PA065_01078	105601_PA070_01274	105614_PA093_01078	105616_PV004_00507	105636_PV086_01504	105640_PV091_00519	105642_PV093_01173	105746_cerdo_0_1_C1_01630	105747_cerdo_0_1_C2_01565	108479_3070_00540	108481_3072_01122	108483_3074_00871	108486_3077_00779	108491_3082_00662	108492_3083_00708	108494_3085_00422	108498_3089_00780	108504_3095_00703	108508_3099_01126	108524_3325_00801	108528_3330_00582	108546_3348_00593	112371_CAM000139_1663_01377
g00548_00005__g00548	pseB	UDP-N-acetylglucosamine 4%2C6-dehydratase (inverting)	460	0	1	42	3	NA	NA		pseB(461)	354	1005	105577_PA010_00703	105578_PA017_01070	105579_PA026_00897	105580_PA028_01419	105581_PA029_00929	105583_PA031_01101;105583_PA031_01977	105584_PA032_00870	105585_PA033_01100	105586_PA034_01494	105587_PA040_01686	105590_PA048_01395	105593_PA061_01553	105594_PA062_01059	105597_PA065_01077	105601_PA070_01273	105614_PA093_01079	105616_PV004_00508	105636_PV086_01503	105640_PV091_00518	105642_PV093_01174	105746_cerdo_0_1_C1_01631	105747_cerdo_0_1_C2_01564	108479_3070_00541	108481_3072_01123	108483_3074_00872	108486_3077_00780	108491_3082_00661	108492_3083_00707	108494_3085_00421	108498_3089_00781	108504_3095_00704	108508_3099_01127	108524_3325_00802	108528_3330_00583	108546_3348_00592	112371_CAM000139_1663_01376
g02040_00005__g02040	rplE	50S ribosomal protein L5	460	0	1	43	1	NA	NA		rplE(460)	543	543	105577_PA010_00066	105578_PA017_00800	105579_PA026_00350	105580_PA028_00841	105581_PA029_00066	105583_PA031_00424	105584_PA032_00415	105585_PA033_00066	105586_PA034_00498	105587_PA040_01180	105590_PA048_00699	105593_PA061_00066	105594_PA062_00239	105597_PA065_00549	105601_PA070_00828	105614_PA093_00844	105616_PV004_00620	105636_PV086_01077	105640_PV091_00968	105642_PV093_00780	105746_cerdo_0_1_C1_01165	105747_cerdo_0_1_C2_01142	108479_3070_00412	108481_3072_00941	108483_3074_00294	108486_3077_00014	108491_3082_00328	108492_3083_00552	108494_3085_00024	108498_3089_00265	108504_3095_00652	108508_3099_00304	108524_3325_00379	108528_3330_00257	108546_3348_00155	112371_CAM000139_1663_01301
g00058_00006__g00058	rpsZ	30S ribosomal protein S14 type Z	460	0	1	43	2	NA	NA		rpsZ(460)	186	186	105577_PA010_00067	105578_PA017_00801	105579_PA026_00351	105580_PA028_00842	105581_PA029_00067	105583_PA031_00425	105584_PA032_00416	105585_PA033_00067	105586_PA034_00499	105587_PA040_01181	105590_PA048_00700	105593_PA061_00067	105594_PA062_00240	105597_PA065_00550	105601_PA070_00829	105614_PA093_00845	105616_PV004_00621	105636_PV086_01078	105640_PV091_00969	105642_PV093_00781	105746_cerdo_0_1_C1_01166	105747_cerdo_0_1_C2_01143	108479_3070_00411	108481_3072_00942	108483_3074_00295	108486_3077_00015	108491_3082_00329	108492_3083_00553	108494_3085_00023	108498_3089_00266	108504_3095_00653	108508_3099_00303	108524_3325_00378	108528_3330_00256	108546_3348_00154	112371_CAM000139_1663_01300
g02096_00005__g02096	rpsH	30S ribosomal protein S8	460	0	1	43	3	NA	NA		rpsH(461)	396	396	105577_PA010_00068	105578_PA017_00802	105579_PA026_00352	105580_PA028_00843	105581_PA029_00068	105583_PA031_00426	105584_PA032_00417	105585_PA033_00068	105586_PA034_00500	105587_PA040_01182	105590_PA048_00701	105593_PA061_00068	105594_PA062_00241	105597_PA065_00551	105601_PA070_00830	105614_PA093_00846	105616_PV004_00622	105636_PV086_01079	105640_PV091_00970	105642_PV093_00782	105746_cerdo_0_1_C1_01167	105747_cerdo_0_1_C2_01144	108479_3070_00410	108481_3072_00943	108483_3074_00296	108486_3077_00016	108491_3082_00330	108492_3083_00554	108494_3085_00022	108498_3089_00267	108504_3095_00654	108508_3099_00302	108524_3325_00377	108528_3330_00255	108546_3348_00153	112371_CAM000139_1663_01299
g00148_00003__g00148	dcuD	Putative cryptic C4-dicarboxylate transporter DcuD	460	0	1	44	1	NA	NA		dcuD(532):NA(17)	180	1527	105577_PA010_00570	105578_PA017_01173	105579_PA026_00637	105580_PA028_01155	105581_PA029_00821	105583_PA031_00524;105583_PA031_00525	105584_PA032_00589	105585_PA033_00825;105585_PA033_00826	105586_PA034_01180	105587_PA040_01485	105590_PA048_01201	105593_PA061_00294	105594_PA062_00337	105597_PA065_00461	105601_PA070_00412	105614_PA093_00943	105616_PV004_00788	105636_PV086_01174	105640_PV091_01156	105642_PV093_00436	105746_cerdo_0_1_C1_01303;105746_cerdo_0_1_C1_01304;105746_cerdo_0_1_C1_01305	105747_cerdo_0_1_C2_01280;105747_cerdo_0_1_C2_01281;105747_cerdo_0_1_C2_01282	108479_3070_00857	108481_3072_00750	108483_3074_00246	108486_3077_00912	108491_3082_01178	108492_3083_00318	108494_3085_00858	108498_3089_00213	108504_3095_00247	108508_3099_00390	108524_3325_01017	108528_3330_00239;108528_3330_00240	108546_3348_00570	112371_CAM000139_1663_00856
g00538_00005__g00538	metC	Cystathionine beta-lyase	460	0	1	44	2	NA	NA		metC(461)	435	1164	105577_PA010_00569	105578_PA017_01172	105579_PA026_00636	105580_PA028_01154	105581_PA029_00820	105583_PA031_00526	105584_PA032_00590	105585_PA033_00827	105586_PA034_01181	105587_PA040_01484	105590_PA048_01200	105593_PA061_00293	105594_PA062_00336	105597_PA065_00460	105601_PA070_00411	105614_PA093_00942	105616_PV004_00787	105636_PV086_01173	105640_PV091_01157	105642_PV093_00435	105746_cerdo_0_1_C1_01306	105747_cerdo_0_1_C2_01283	108479_3070_00858	108481_3072_00751	108483_3074_00245	108486_3077_00913	108491_3082_01179	108492_3083_00317	108494_3085_00859	108498_3089_00212	108504_3095_00248	108508_3099_00389	108524_3325_01018	108528_3330_00238	108546_3348_00571	112371_CAM000139_1663_00855
g00919_00005__g00919	pcaB	3-carboxy-cis%2Ccis-muconate cycloisomerase	460	0	1	44	3	NA	NA		pcaB(469):NA(59)	252	1368	105577_PA010_00568	105578_PA017_01171	105579_PA026_00635	105580_PA028_01153	105581_PA029_00819	105583_PA031_00527;105583_PA031_00528	105584_PA032_00591	105585_PA033_00828;105585_PA033_00829	105586_PA034_01182	105587_PA040_01483	105590_PA048_01199	105593_PA061_00292	105594_PA062_00335	105597_PA065_00459	105601_PA070_00410	105614_PA093_00941	105616_PV004_00786	105636_PV086_01172	105640_PV091_01158	105642_PV093_00434	105746_cerdo_0_1_C1_01307	105747_cerdo_0_1_C2_01284	108479_3070_00859	108481_3072_00752	108483_3074_00244	108486_3077_00914	108491_3082_01180	108492_3083_00316	108494_3085_00860	108498_3089_00211	108504_3095_00249	108508_3099_00388	108524_3325_01019	108528_3330_00237	108546_3348_00572	112371_CAM000139_1663_00854
g01154_00005__g01154	ybiT	putative ABC transporter ATP-binding protein YbiT	460	0	1	45	1	NA	NA		ybiT(462)	249	1578	105577_PA010_00258	105578_PA017_00409	105579_PA026_01078	105580_PA028_00169	105581_PA029_01256	105583_PA031_01606	105584_PA032_00941	105585_PA033_00742	105586_PA034_01751	105587_PA040_00176	105590_PA048_01844	105593_PA061_00717	105594_PA062_01501	105597_PA065_00007	105601_PA070_00456	105614_PA093_00285	105616_PV004_01279	105636_PV086_01584	105640_PV091_00171	105642_PV093_00173	105746_cerdo_0_1_C1_01092	105747_cerdo_0_1_C2_00735	108479_3070_01538	108481_3072_01619	108483_3074_01518	108486_3077_01479;108486_3077_01480	108491_3082_01350	108492_3083_01474	108494_3085_01055	108498_3089_01585	108504_3095_00292	108508_3099_01358	108524_3325_00730	108528_3330_00366	108546_3348_01258	112371_CAM000139_1663_01707
g02131_00005__g02131	NA	hypothetical protein	460	0	1	45	2	NA	NA		NA(461)	333	333	105577_PA010_00257	105578_PA017_00408	105579_PA026_01077	105580_PA028_00168	105581_PA029_01257	105583_PA031_01607	105584_PA032_00942	105585_PA033_00741	105586_PA034_01750	105587_PA040_00175	105590_PA048_01843	105593_PA061_00716	105594_PA062_01502	105597_PA065_00006	105601_PA070_00455	105614_PA093_00284	105616_PV004_01280	105636_PV086_01583	105640_PV091_00172	105642_PV093_00174	105746_cerdo_0_1_C1_01093	105747_cerdo_0_1_C2_00734	108479_3070_01537	108481_3072_01618	108483_3074_01517	108486_3077_01478	108491_3082_01351	108492_3083_01475	108494_3085_01056	108498_3089_01584	108504_3095_00293	108508_3099_01359	108524_3325_00729	108528_3330_00367	108546_3348_01257	112371_CAM000139_1663_01708
g00884_00002__g00884	NA	hypothetical protein	460	0	1	45	3	NA	NA		NA(461)	378	384	105577_PA010_00256	105578_PA017_00407	105579_PA026_01076	105580_PA028_00167	105581_PA029_01258	105583_PA031_01608	105584_PA032_00943	105585_PA033_00740	105586_PA034_01749	105587_PA040_00174	105590_PA048_01842	105593_PA061_00715	105594_PA062_01503	105597_PA065_00005	105601_PA070_00454	105614_PA093_00283	105616_PV004_01281	105636_PV086_01582	105640_PV091_00173	105642_PV093_00175	105746_cerdo_0_1_C1_01094	105747_cerdo_0_1_C2_00733	108479_3070_01536	108481_3072_01617	108483_3074_01516	108486_3077_01477	108491_3082_01352	108492_3083_01476	108494_3085_01057	108498_3089_01583	108504_3095_00294	108508_3099_01360	108524_3325_00728	108528_3330_00368	108546_3348_01256	112371_CAM000139_1663_01709
g01210_00003__g01210	macB	Macrolide export ATP-binding/permease protein MacB	460	0	1	46	1	NA	NA		macB(460)	1125	1926	105577_PA010_01332	105578_PA017_00249	105579_PA026_01129	105580_PA028_00436	105581_PA029_00693	105583_PA031_00997	105584_PA032_00013	105585_PA033_00866	105586_PA034_00110	105587_PA040_00011	105590_PA048_00441	105593_PA061_01003	105594_PA062_01409	105597_PA065_00287	105601_PA070_01416	105614_PA093_00010	105616_PV004_00109	105636_PV086_00698	105640_PV091_00190	105642_PV093_00866	105746_cerdo_0_1_C1_00611	105747_cerdo_0_1_C2_00572	108479_3070_01151	108481_3072_00561	108483_3074_00214	108486_3077_00673	108491_3082_00010	108492_3083_00044	108494_3085_00200	108498_3089_00810	108504_3095_00069	108508_3099_00729	108524_3325_00248	108528_3330_00647	108546_3348_00118	112371_CAM000139_1663_00550
g00330_00003__g00330	tdeA	Toxin and drug export protein A	460	0	1	46	2	NA	NA		tdeA(461)	576	1371	105577_PA010_01333	105578_PA017_00248	105579_PA026_01128	105580_PA028_00435	105581_PA029_00692	105583_PA031_00996	105584_PA032_00012	105585_PA033_00865	105586_PA034_00109	105587_PA040_00010	105590_PA048_00440	105593_PA061_01002	105594_PA062_01410	105597_PA065_00286	105601_PA070_01415	105614_PA093_00009	105616_PV004_00108	105636_PV086_00697	105640_PV091_00189	105642_PV093_00865	105746_cerdo_0_1_C1_00612	105747_cerdo_0_1_C2_00571	108479_3070_01152	108481_3072_00562	108483_3074_00215	108486_3077_00674	108491_3082_00009	108492_3083_00045	108494_3085_00199	108498_3089_00811	108504_3095_00070	108508_3099_00730	108524_3325_00247	108528_3330_00648	108546_3348_00117	112371_CAM000139_1663_00549
g00445_00003__g00445	NA	hypothetical protein	460	0	1	46	3	NA	NA		NA(468)	147	1179	105577_PA010_01334	105578_PA017_00247	105579_PA026_01127	105580_PA028_00434	105581_PA029_00691	105583_PA031_00995	105584_PA032_00011	105585_PA033_00864	105586_PA034_00108	105587_PA040_00009	105590_PA048_00439	105593_PA061_01001	105594_PA062_01411	105597_PA065_00285	105601_PA070_01414	105614_PA093_00008	105616_PV004_00107	105636_PV086_00696	105640_PV091_00188	105642_PV093_00864	105746_cerdo_0_1_C1_00613	105747_cerdo_0_1_C2_00570	108479_3070_01153	108481_3072_00563	108483_3074_00216	108486_3077_00675	108491_3082_00008	108492_3083_00046	108494_3085_00198	108498_3089_00812	108504_3095_00071	108508_3099_00731	108524_3325_00246	108528_3330_00649	108546_3348_00116	112371_CAM000139_1663_00548
g00443_1_00006__g00443_1	lysA	Diaminopimelate decarboxylase	460	0	1	47	1	NA	NA		lysA(460)	1047	1209	105577_PA010_00899	105578_PA017_00519	105579_PA026_00218	105580_PA028_00278	105581_PA029_00547	105583_PA031_00364	105584_PA032_00548	105585_PA033_00302	105586_PA034_01513	105587_PA040_00286	105590_PA048_00270	105593_PA061_00506	105594_PA062_00582	105597_PA065_00116	105601_PA070_00565	105614_PA093_00489	105616_PV004_01356	105636_PV086_01432	105640_PV091_00062	105642_PV093_00064	105746_cerdo_0_1_C1_00981	105747_cerdo_0_1_C2_00846	108479_3070_00148	108481_3072_00175	108483_3074_01111	108486_3077_00529	108491_3082_00405	108492_3083_01086	108494_3085_00267	108498_3089_00557	108504_3095_00716	108508_3099_01023	108524_3325_00454	108528_3330_00059	108546_3348_00191	112371_CAM000139_1663_00971
g00685_00003__g00685	nagD	Ribonucleotide monophosphatase NagD	460	0	1	47	2	NA	NA		nagD(421):hdpA(35):yutF(3):NA(1)	261	768	105577_PA010_00900	105578_PA017_00518	105579_PA026_00219	105580_PA028_00277	105581_PA029_00548	105583_PA031_00363	105584_PA032_00549	105585_PA033_00303	105586_PA034_01512	105587_PA040_00285	105590_PA048_00269	105593_PA061_00507	105594_PA062_00583	105597_PA065_00115	105601_PA070_00564	105614_PA093_00490	105616_PV004_01355	105636_PV086_01431	105640_PV091_00063	105642_PV093_00065	105746_cerdo_0_1_C1_00982	105747_cerdo_0_1_C2_00845	108479_3070_00149	108481_3072_00176	108483_3074_01110	108486_3077_00528	108491_3082_00406	108492_3083_01137	108494_3085_00266	108498_3089_00558	108504_3095_00717	108508_3099_01022	108524_3325_00455	108528_3330_00058	108546_3348_00192	112371_CAM000139_1663_00972
g00069_00006__g00069	pheA	Bifunctional chorismate mutase/prephenate dehydratase	460	0	1	47	3	NA	NA		pheA(460)	804	1083	105577_PA010_00901	105578_PA017_00517	105579_PA026_00220	105580_PA028_00276	105581_PA029_00549	105583_PA031_00362	105584_PA032_00550	105585_PA033_00304	105586_PA034_01511	105587_PA040_00284	105590_PA048_00268	105593_PA061_00508	105594_PA062_00584	105597_PA065_00114	105601_PA070_00563	105614_PA093_00491	105616_PV004_01354	105636_PV086_01430	105640_PV091_00064	105642_PV093_00066	105746_cerdo_0_1_C1_00983	105747_cerdo_0_1_C2_00844	108479_3070_00150	108481_3072_00177	108483_3074_01109	108486_3077_00527	108491_3082_00407	108492_3083_01136	108494_3085_00265	108498_3089_00559	108504_3095_00718	108508_3099_01021	108524_3325_00456	108528_3330_00057	108546_3348_00193	112371_CAM000139_1663_00973
g00046_00006__g00046	pal	Peptidoglycan-associated lipoprotein	460	0	1	48	1	NA	NA		pal(460)	498	498	105577_PA010_00108	105578_PA017_00842	105579_PA026_00392	105580_PA028_00883	105581_PA029_00108	105583_PA031_00468	105584_PA032_00457	105585_PA033_00110	105586_PA034_00540	105587_PA040_01224	105590_PA048_00741	105593_PA061_00108	105594_PA062_00281	105597_PA065_00591	105601_PA070_00870	105614_PA093_00887	105616_PV004_00913	105636_PV086_01119	105640_PV091_01010	105642_PV093_00822	105746_cerdo_0_1_C1_01220	105747_cerdo_0_1_C2_01197	108479_3070_00370	108481_3072_00884	108483_3074_00336	108486_3077_00056	108491_3082_00109	108492_3083_00130	108494_3085_00141	108498_3089_00307	108504_3095_00767	108508_3099_00757	108524_3325_00330	108528_3330_01066	108546_3348_00324	112371_CAM000139_1663_01259
g00667_00003__g00667	cpoB	Cell division coordinator CpoB	460	0	1	48	2	NA	NA		cpoB(460):NA(1)	330	954	105577_PA010_00109	105578_PA017_00843	105579_PA026_00393	105580_PA028_00884	105581_PA029_00109	105583_PA031_00469	105584_PA032_00458	105585_PA033_00111	105586_PA034_00541	105587_PA040_01225	105590_PA048_00742	105593_PA061_00109	105594_PA062_00282	105597_PA065_00592	105601_PA070_00871	105614_PA093_00888	105616_PV004_00914	105636_PV086_01120	105640_PV091_01011	105642_PV093_00823	105746_cerdo_0_1_C1_01221	105747_cerdo_0_1_C2_01198	108479_3070_00369	108481_3072_00883	108483_3074_00337	108486_3077_00057	108491_3082_00108	108492_3083_00129	108494_3085_00142	108498_3089_00308	108504_3095_00766	108508_3099_00758	108524_3325_00331	108528_3330_01065	108546_3348_00325	112371_CAM000139_1663_01258
g00236_1_00007__g00236_1	fabD	hypothetical protein	460	0	1	48	3	NA	NA		NA(460):fabD(458):slyD(1)	348	1494	105577_PA010_00110;105577_PA010_00111	105578_PA017_00844;105578_PA017_00845	105579_PA026_00394;105579_PA026_00395	105580_PA028_00885;105580_PA028_00886	105581_PA029_00110;105581_PA029_00111	105583_PA031_00470;105583_PA031_00471	105584_PA032_00459;105584_PA032_00460	105585_PA033_00112;105585_PA033_00113	105586_PA034_00542;105586_PA034_00543	105587_PA040_01226;105587_PA040_01227	105590_PA048_00743;105590_PA048_00744	105593_PA061_00110;105593_PA061_00111	105594_PA062_00283;105594_PA062_00284	105597_PA065_00593;105597_PA065_00594	105601_PA070_00872;105601_PA070_00873	105614_PA093_00889;105614_PA093_00890	105616_PV004_00915;105616_PV004_00916	105636_PV086_01121;105636_PV086_01122	105640_PV091_01012;105640_PV091_01013	105642_PV093_00824;105642_PV093_00825	105746_cerdo_0_1_C1_01222;105746_cerdo_0_1_C1_01223	105747_cerdo_0_1_C2_01199;105747_cerdo_0_1_C2_01200	108479_3070_00367;108479_3070_00368	108481_3072_00881;108481_3072_00882	108483_3074_00338;108483_3074_00339	108486_3077_00058;108486_3077_00059	108491_3082_00106;108491_3082_00107	108492_3083_00127;108492_3083_00128	108494_3085_00143;108494_3085_00144	108498_3089_00309;108498_3089_00310	108504_3095_00764;108504_3095_00765	108508_3099_00759;108508_3099_00760	108524_3325_00332;108524_3325_00333	108528_3330_01063;108528_3330_01064	108546_3348_00326;108546_3348_00327	112371_CAM000139_1663_01256;112371_CAM000139_1663_01257
g00007_00006__g00007	rpsE	30S ribosomal protein S5	460	0	1	49	1	NA	NA		rpsE(460)	444	444	105577_PA010_00071	105578_PA017_00805	105579_PA026_00355	105580_PA028_00846	105581_PA029_00071	105583_PA031_00429	105584_PA032_00420	105585_PA033_00071	105586_PA034_00503	105587_PA040_01185	105590_PA048_00704	105593_PA061_00071	105594_PA062_00244	105597_PA065_00554	105601_PA070_00833	105614_PA093_00849	105616_PV004_00625	105636_PV086_01082	105640_PV091_00973	105642_PV093_00785	105746_cerdo_0_1_C1_01170	105747_cerdo_0_1_C2_01147	108479_3070_00407	108481_3072_00946	108483_3074_00299	108486_3077_00019	108491_3082_00333	108492_3083_00557	108494_3085_00019	108498_3089_00270	108504_3095_00657	108508_3099_00299	108524_3325_00374	108528_3330_00252	108546_3348_00150	112371_CAM000139_1663_01296
g02098_00005__g02098	rplO	50S ribosomal protein L15	460	0	1	49	2	NA	NA		rplO(460)	393	393	105577_PA010_00072	105578_PA017_00806	105579_PA026_00356	105580_PA028_00847	105581_PA029_00072	105583_PA031_00430	105584_PA032_00421	105585_PA033_00072	105586_PA034_00504	105587_PA040_01186	105590_PA048_00705	105593_PA061_00072	105594_PA062_00245	105597_PA065_00555	105601_PA070_00834	105614_PA093_00850	105616_PV004_00626	105636_PV086_01083	105640_PV091_00974	105642_PV093_00786	105746_cerdo_0_1_C1_01171	105747_cerdo_0_1_C2_01148	108479_3070_00406	108481_3072_00947	108483_3074_00300	108486_3077_00020	108491_3082_00334	108492_3083_00558	108494_3085_00018	108498_3089_00271	108504_3095_00658	108508_3099_00298	108524_3325_00373	108528_3330_00251	108546_3348_00149	112371_CAM000139_1663_01295
g00033_00006__g00033	secY	Protein translocase subunit SecY	460	0	1	49	3	NA	NA		secY(460)	1266	1266	105577_PA010_00073	105578_PA017_00807	105579_PA026_00357	105580_PA028_00848	105581_PA029_00073	105583_PA031_00431	105584_PA032_00422	105585_PA033_00073	105586_PA034_00505	105587_PA040_01187	105590_PA048_00706	105593_PA061_00073	105594_PA062_00246	105597_PA065_00556	105601_PA070_00835	105614_PA093_00851	105616_PV004_00627	105636_PV086_01084	105640_PV091_00975	105642_PV093_00787	105746_cerdo_0_1_C1_01172	105747_cerdo_0_1_C2_01149	108479_3070_00405	108481_3072_00948	108483_3074_00301	108486_3077_00021	108491_3082_00335	108492_3083_00559	108494_3085_00017	108498_3089_00272	108504_3095_00659	108508_3099_00297	108524_3325_00372	108528_3330_00250	108546_3348_00148	112371_CAM000139_1663_01294
g01676_00005__g01676	NA	hypothetical protein	460	0	1	50	1	NA	NA		NA(460)	330	495	105577_PA010_01171	105578_PA017_00169	105579_PA026_01356	105580_PA028_00802	105581_PA029_01088	105583_PA031_00247	105584_PA032_00995	105585_PA033_00460	105586_PA034_01257	105587_PA040_01507	105590_PA048_01163	105593_PA061_01395	105594_PA062_01360	105597_PA065_00912	105601_PA070_00187	105614_PA093_01361	105616_PV004_00670	105636_PV086_00360	105640_PV091_01435	105642_PV093_01297	105746_cerdo_0_1_C1_00085	105747_cerdo_0_1_C2_00370	108479_3070_00756	108481_3072_01168	108483_3074_00099	108486_3077_00457	108491_3082_00045	108492_3083_00155	108494_3085_00056	108498_3089_00477	108504_3095_00463	108508_3099_00991	108524_3325_00058	108528_3330_00284	108546_3348_00251	112371_CAM000139_1663_00084
g01746_00006__g01746	NA	hypothetical protein	460	0	1	50	2	NA	NA		NA(460)	132	270	105577_PA010_01170	105578_PA017_00168	105579_PA026_01355	105580_PA028_00803	105581_PA029_01087	105583_PA031_00246	105584_PA032_00994	105585_PA033_00459	105586_PA034_01256	105587_PA040_01506	105590_PA048_01164	105593_PA061_01394	105594_PA062_01359	105597_PA065_00911	105601_PA070_00186	105614_PA093_01360	105616_PV004_00669	105636_PV086_00359	105640_PV091_01434	105642_PV093_01296	105746_cerdo_0_1_C1_00086	105747_cerdo_0_1_C2_00369	108479_3070_00755	108481_3072_01167	108483_3074_00098	108486_3077_00456	108491_3082_00044	108492_3083_00154	108494_3085_00057	108498_3089_00476	108504_3095_00464	108508_3099_00990	108524_3325_00057	108528_3330_00283	108546_3348_00250	112371_CAM000139_1663_00085
g00814_00003__g00814	czcD	Cadmium%2C cobalt and zinc/H(+)-K(+) antiporter	460	0	1	50	3	NA	NA		czcD(460)	468	951	105577_PA010_01169	105578_PA017_00167	105579_PA026_01354	105580_PA028_00804	105581_PA029_01086	105583_PA031_00245	105584_PA032_00993	105585_PA033_00458	105586_PA034_01255	105587_PA040_01505	105590_PA048_01165	105593_PA061_01393	105594_PA062_01358	105597_PA065_00910	105601_PA070_00185	105614_PA093_01359	105616_PV004_00668	105636_PV086_00358	105640_PV091_01433	105642_PV093_01295	105746_cerdo_0_1_C1_00087	105747_cerdo_0_1_C2_00368	108479_3070_00754	108481_3072_01166	108483_3074_00097	108486_3077_00455	108491_3082_00043	108492_3083_00153	108494_3085_00058	108498_3089_00475	108504_3095_00465	108508_3099_00989	108524_3325_00056	108528_3330_00282	108546_3348_00249	112371_CAM000139_1663_00086
g01261_00005__g01261	yclO	Petrobactin import system permease protein YclO	460	0	1	51	1	NA	NA		yclO(460)	279	939	105577_PA010_00607	105578_PA017_01209	105579_PA026_00673	105580_PA028_01560	105581_PA029_01743	105583_PA031_01373	105584_PA032_01431	105585_PA033_01387	105586_PA034_01121	105587_PA040_01326	105590_PA048_01683	105593_PA061_00330	105594_PA062_00373	105597_PA065_01519	105601_PA070_00448	105614_PA093_01682	105616_PV004_01737	105636_PV086_01211	105640_PV091_01641	105642_PV093_00472	105746_cerdo_0_1_C1_01755	105747_cerdo_0_1_C2_01749	108479_3070_01247	108481_3072_01143	108483_3074_01123	108486_3077_01211	108491_3082_01267	108492_3083_01164	108494_3085_01036	108498_3089_01553	108504_3095_00866	108508_3099_01459	108524_3325_01332	108528_3330_00945	108546_3348_00269	112371_CAM000139_1663_00892
g00274_1_00014__g00274_1	yclP	Petrobactin import ATP-binding protein YclP	460	0	1	51	2	NA	NA		yclP(460):btuD(1)	285	759	105577_PA010_00606	105578_PA017_01208	105579_PA026_00672	105580_PA028_01559	105581_PA029_01744	105583_PA031_01374	105584_PA032_01432	105585_PA033_01388	105586_PA034_01120	105587_PA040_01327	105590_PA048_01684	105593_PA061_00329	105594_PA062_00372	105597_PA065_01518	105601_PA070_00447	105614_PA093_01683	105616_PV004_01738	105636_PV086_01210	105640_PV091_01642	105642_PV093_00471	105746_cerdo_0_1_C1_01754	105747_cerdo_0_1_C2_01748	108479_3070_01248	108481_3072_01142	108483_3074_01122	108486_3077_01212	108491_3082_01266	108492_3083_01165	108494_3085_01035	108498_3089_01552	108504_3095_00865	108508_3099_01458	108524_3325_01333	108528_3330_00944	108546_3348_00268	112371_CAM000139_1663_00891
g00270_2_00010__g00270_2	yclQ	Petrobactin-binding protein YclQ	460	0	1.01	51	3	NA	NA		yclQ(460):NA(5)	399	990	105577_PA010_00605	105578_PA017_01207	105579_PA026_00671	105580_PA028_01558	105581_PA029_01745	105583_PA031_01375	105584_PA032_01433	105585_PA033_01389	105586_PA034_01119	105587_PA040_01328	105590_PA048_01685	105593_PA061_00328	105594_PA062_00371	105597_PA065_01517	105601_PA070_00446	105614_PA093_01684	105616_PV004_01739	105636_PV086_01209	105640_PV091_01643	105642_PV093_00470	105746_cerdo_0_1_C1_01753	105747_cerdo_0_1_C2_01747	108479_3070_01249	108481_3072_01141	108483_3074_01121	108486_3077_01213	108491_3082_01265	108492_3083_01166	108494_3085_01034	108498_3089_01551	108504_3095_00864	108508_3099_01457	108524_3325_01334	108528_3330_00943	108546_3348_00267	112371_CAM000139_1663_00890
g01464_1_00007__g01464_1	purB	Adenylosuccinate lyase	460	0	1	52	1	NA	NA		purB(460)	1329	1329	105577_PA010_00007	105578_PA017_00740	105579_PA026_00291	105580_PA028_01482	105581_PA029_00007	105583_PA031_00750	105584_PA032_01520	105585_PA033_00007	105586_PA034_00803	105587_PA040_01121	105590_PA048_00640	105593_PA061_00007	105594_PA062_00709	105597_PA065_00490	105601_PA070_00769	105614_PA093_01113	105616_PV004_01114	105636_PV086_01017	105640_PV091_01187	105642_PV093_00997	105746_cerdo_0_1_C1_01105	105747_cerdo_0_1_C2_01082	108479_3070_00948	108481_3072_00954	108483_3074_00915	108486_3077_00928	108491_3082_00254	108492_3083_00942	108494_3085_00617	108498_3089_00711	108504_3095_00843	108508_3099_00236	108524_3325_01168	108528_3330_00617	108546_3348_00486	112371_CAM000139_1663_01360
g01840_00005__g01840	nrdA	Ribonucleoside-diphosphate reductase 1 subunit alpha	460	0	1	52	2	NA	NA		nrdA(458):nrdE(3):NA(2)	198	2370	105577_PA010_00006	105578_PA017_00739	105579_PA026_00290	105580_PA028_01481	105581_PA029_00006	105583_PA031_00749	105584_PA032_01519	105585_PA033_00006	105586_PA034_00804	105587_PA040_01120	105590_PA048_00639	105593_PA061_00006	105594_PA062_00708	105597_PA065_00489	105601_PA070_00768	105614_PA093_01112	105616_PV004_01113	105636_PV086_01016	105640_PV091_01186	105642_PV093_00996	105746_cerdo_0_1_C1_01104	105747_cerdo_0_1_C2_01081	108479_3070_00949	108481_3072_00953	108483_3074_00914	108486_3077_00929	108491_3082_00253	108492_3083_00941	108494_3085_00618	108498_3089_00710	108504_3095_00844	108508_3099_00237	108524_3325_01167	108528_3330_00618	108546_3348_00485	112371_CAM000139_1663_01361
g00756_00004__g00756	tcyP	L-cystine uptake protein TcyP	460	0	1	52	3	NA	NA		tcyP(459):NA(2):gltP(1)	189	1386	105577_PA010_00005	105578_PA017_00738	105579_PA026_00289	105580_PA028_01480	105581_PA029_00005	105583_PA031_00748	105584_PA032_01518	105585_PA033_00005	105586_PA034_00805	105587_PA040_01119	105590_PA048_00638	105593_PA061_00005	105594_PA062_00707	105597_PA065_00488	105601_PA070_00767	105614_PA093_01111	105616_PV004_01112	105636_PV086_01015	105640_PV091_01185	105642_PV093_00995	105746_cerdo_0_1_C1_01103	105747_cerdo_0_1_C2_01080	108479_3070_00950	108481_3072_00952	108483_3074_00913	108486_3077_00930	108491_3082_00252	108492_3083_00940	108494_3085_00619	108498_3089_00709	108504_3095_00845	108508_3099_00238	108524_3325_01166	108528_3330_00619	108546_3348_00484	112371_CAM000139_1663_01362
g00536_1_00005__g00536_1	iscS	Cysteine desulfurase IscS	460	0	1	53	1	NA	NA		iscS(460)	951	1182	105577_PA010_01279	105578_PA017_01449	105579_PA026_01278	105580_PA028_01063	105581_PA029_00870	105583_PA031_01307	105584_PA032_01280	105585_PA033_00561	105586_PA034_01167	105587_PA040_01607	105590_PA048_01333	105593_PA061_01183	105594_PA062_01173	105597_PA065_01395	105601_PA070_01502	105614_PA093_00407	105616_PV004_00583	105636_PV086_01683	105640_PV091_01262	105642_PV093_01072	105746_cerdo_0_1_C1_01680	105747_cerdo_0_1_C2_01646	108479_3070_00802	108481_3072_00591	108483_3074_00500	108486_3077_00565	108491_3082_00163	108492_3083_00275	108494_3085_00464	108498_3089_00824	108504_3095_00177	108508_3099_00257	108524_3325_00350	108528_3330_00175	108546_3348_00070	112371_CAM000139_1663_01536
g01548_00005__g01548	NA	hypothetical protein	460	0	1	53	2	NA	NA		NA(462)	306	972	105577_PA010_01278	105578_PA017_01448	105579_PA026_01277	105580_PA028_01062	105581_PA029_00869	105583_PA031_01308	105584_PA032_01279	105585_PA033_00560	105586_PA034_01166	105587_PA040_01606	105590_PA048_01332	105593_PA061_01182	105594_PA062_01172	105597_PA065_01394	105601_PA070_01501	105614_PA093_00406	105616_PV004_00582	105636_PV086_01682	105640_PV091_01261	105642_PV093_01071	105746_cerdo_0_1_C1_01679	105747_cerdo_0_1_C2_01647	108479_3070_00801	108481_3072_00592	108483_3074_00501	108486_3077_00564	108491_3082_00162	108492_3083_00276	108494_3085_00463	108498_3089_00825	108504_3095_00176	108508_3099_00258	108524_3325_00349	108528_3330_00174	108546_3348_00071	112371_CAM000139_1663_01535
g00513_00003__g00513	ynaI	hypothetical protein	460	0	1	53	3	NA	NA		NA(459):ynaI(2)	219	1884	105577_PA010_01277	105578_PA017_01447	105579_PA026_01276	105580_PA028_01061	105581_PA029_00868	105583_PA031_01309	105584_PA032_01278	105585_PA033_00559	105586_PA034_01165	105587_PA040_01605	105590_PA048_01331	105593_PA061_01181	105594_PA062_01171	105597_PA065_01393	105601_PA070_01500	105614_PA093_00405	105616_PV004_00581	105636_PV086_01681	105640_PV091_01260	105642_PV093_01070	105746_cerdo_0_1_C1_01678	105747_cerdo_0_1_C2_01648	108479_3070_00800	108481_3072_00593	108483_3074_00502	108486_3077_00563	108491_3082_00161	108492_3083_00277	108494_3085_00462	108498_3089_00826	108504_3095_00175	108508_3099_00259	108524_3325_00348	108528_3330_00173	108546_3348_00072	112371_CAM000139_1663_01534
g01954_00005__g01954	NA	hypothetical protein	460	0	1	54	1	NA	NA		NA(461)	213	765	105577_PA010_01509	105578_PA017_00096	105579_PA026_00053	105580_PA028_00053	105581_PA029_00187	105583_PA031_01474	105584_PA032_00666	105585_PA033_00917	105586_PA034_01016	105587_PA040_00778	105590_PA048_00053	105593_PA061_01292	105594_PA062_00642	105597_PA065_01302	105601_PA070_00115	105614_PA093_01029	105616_PV004_01646	105636_PV086_00283	105640_PV091_01293	105642_PV093_00190	105746_cerdo_0_1_C1_00166	105747_cerdo_0_1_C2_00289	108479_3070_01136	108481_3072_01349	108483_3074_00789	108486_3077_00232	108491_3082_00285	108492_3083_01148	108494_3085_01328	108498_3089_00427	108504_3095_00872	108508_3099_01510	108524_3325_01405	108528_3330_01032	108546_3348_01305	112371_CAM000139_1663_00161
g00693_00003__g00693	nth	Endonuclease III	460	0	1	54	2	NA	NA		nth(456):NA(4)	150	687	105577_PA010_01510	105578_PA017_00095	105579_PA026_00054	105580_PA028_00054	105581_PA029_00188	105583_PA031_01475	105584_PA032_00667	105585_PA033_00918	105586_PA034_01017	105587_PA040_00777	105590_PA048_00054	105593_PA061_01293	105594_PA062_00643	105597_PA065_01303	105601_PA070_00114	105614_PA093_01030	105616_PV004_01647	105636_PV086_00282	105640_PV091_01294	105642_PV093_00191	105746_cerdo_0_1_C1_00167	105747_cerdo_0_1_C2_00288	108479_3070_01137	108481_3072_01348	108483_3074_00790	108486_3077_00233	108491_3082_00286	108492_3083_01147	108494_3085_01327	108498_3089_00428	108504_3095_00873	108508_3099_01629	108524_3325_01404	108528_3330_01031	108546_3348_01306	112371_CAM000139_1663_00162
g01572_00003__g01572	thiD	Hydroxymethylpyrimidine/phosphomethylpyrimidine kinase	460	0	1	54	3	NA	NA		thiD(461)	696	840	105577_PA010_01511	105578_PA017_00094	105579_PA026_00055	105580_PA028_00055	105581_PA029_00189	105583_PA031_01476;105583_PA031_01906	105584_PA032_00668	105585_PA033_00919	105586_PA034_01018	105587_PA040_00776	105590_PA048_00055	105593_PA061_01294	105594_PA062_00644	105597_PA065_01304	105601_PA070_00113	105614_PA093_01031	105616_PV004_01648	105636_PV086_00281	105640_PV091_01295	105642_PV093_00192	105746_cerdo_0_1_C1_00168	105747_cerdo_0_1_C2_00287	108479_3070_01138	108481_3072_01347	108483_3074_00791	108486_3077_00234	108491_3082_00287	108492_3083_01146	108494_3085_01326	108498_3089_00429	108504_3095_00874	108508_3099_01628	108524_3325_01403	108528_3330_01030	108546_3348_01307	112371_CAM000139_1663_00163
g01089_00004__g01089	rnhA	Ribonuclease H	460	0	1	55	1	NA	NA		rnhA(460)	225	441	105577_PA010_00431	105578_PA017_00670	105579_PA026_01427	105580_PA028_00676	105581_PA029_01542	105583_PA031_01667	105584_PA032_01229	105585_PA033_01181	105586_PA034_00328	105587_PA040_00853	105590_PA048_01090	105593_PA061_00628	105594_PA062_00798	105597_PA065_00707	105601_PA070_00992	105614_PA093_00244	105616_PV004_00234	105636_PV086_00819	105640_PV091_00440	105642_PV093_00947	105746_cerdo_0_1_C1_00815	105747_cerdo_0_1_C2_01012	108479_3070_00257	108481_3072_00209	108483_3074_01609	108486_3077_01545	108491_3082_01468	108492_3083_00768	108494_3085_00378	108498_3089_00579	108504_3095_00198	108508_3099_00119	108524_3325_01260	108528_3330_01159	108546_3348_01475	112371_CAM000139_1663_01142
g01318_00004__g01318	rnc	Ribonuclease 3	460	0	1	55	2	NA	NA		rnc(460)	675	675	105577_PA010_00430	105578_PA017_00669	105579_PA026_01426	105580_PA028_00675	105581_PA029_01541	105583_PA031_01668	105584_PA032_01228	105585_PA033_01180	105586_PA034_00327	105587_PA040_00852	105590_PA048_01089	105593_PA061_00627	105594_PA062_00797	105597_PA065_00706	105601_PA070_00991	105614_PA093_00243	105616_PV004_00233	105636_PV086_00818	105640_PV091_00439	105642_PV093_00946	105746_cerdo_0_1_C1_00816	105747_cerdo_0_1_C2_01011	108479_3070_00256	108481_3072_00210	108483_3074_01610	108486_3077_01546	108491_3082_01469	108492_3083_00769	108494_3085_00379	108498_3089_00578	108504_3095_00199	108508_3099_00120	108524_3325_01259	108528_3330_01160	108546_3348_01474	112371_CAM000139_1663_01143
g00451_00004__g00451	aroC	Chorismate synthase	460	0	1	55	3	NA	NA		aroC(460)	1089	1095	105577_PA010_00429	105578_PA017_00668	105579_PA026_01425	105580_PA028_00674	105581_PA029_01540	105583_PA031_01669	105584_PA032_01227	105585_PA033_01179	105586_PA034_00326	105587_PA040_00851	105590_PA048_01088	105593_PA061_00626	105594_PA062_00796	105597_PA065_00705	105601_PA070_00990	105614_PA093_00242	105616_PV004_00232	105636_PV086_00817	105640_PV091_00438	105642_PV093_00945	105746_cerdo_0_1_C1_00817	105747_cerdo_0_1_C2_01010	108479_3070_00255	108481_3072_00211	108483_3074_01611	108486_3077_01547	108491_3082_01470	108492_3083_00770	108494_3085_00380	108498_3089_00577	108504_3095_00200	108508_3099_00121	108524_3325_01258	108528_3330_01161	108546_3348_01473	112371_CAM000139_1663_01144
g00815_1_00004__g00815_1	cntI	Pseudopaline exporter CntI	460	0	1	56	1	NA	NA		cntI(458):NA(2)	213	933	105577_PA010_00295	105578_PA017_00447	105579_PA026_01115	105580_PA028_00206	105581_PA029_01444	105583_PA031_01237	105584_PA032_00333	105585_PA033_00780	105586_PA034_00593	105587_PA040_00214	105590_PA048_00198	105593_PA061_00754	105594_PA062_01294	105597_PA065_00044	105601_PA070_00493	105614_PA093_00323	105616_PV004_01025	105636_PV086_01622	105640_PV091_00134	105642_PV093_00136	105746_cerdo_0_1_C1_01053	105747_cerdo_0_1_C2_00774	108479_3070_00692	108481_3072_00802	108483_3074_00367	108486_3077_01460	108491_3082_00189	108492_3083_00107	108494_3085_01209	108498_3089_00688	108504_3095_00735	108508_3099_00538	108524_3325_00561	108528_3330_01272	108546_3348_01255	112371_CAM000139_1663_01043
g01014_00005__g01014	kdsA	2-dehydro-3-deoxyphosphooctonate aldolase	460	0	1	56	2	NA	NA		kdsA(460)	813	816	105577_PA010_00296	105578_PA017_00448	105579_PA026_01116	105580_PA028_00207	105581_PA029_01445	105583_PA031_01238	105584_PA032_00334	105585_PA033_00781	105586_PA034_00594	105587_PA040_00215	105590_PA048_00199	105593_PA061_00755	105594_PA062_01295	105597_PA065_00045	105601_PA070_00494	105614_PA093_00324	105616_PV004_01026	105636_PV086_01623	105640_PV091_00133	105642_PV093_00135	105746_cerdo_0_1_C1_01052	105747_cerdo_0_1_C2_00775	108479_3070_00693	108481_3072_00803	108483_3074_00366	108486_3077_01461	108491_3082_00190	108492_3083_00108	108494_3085_01210	108498_3089_00689	108504_3095_00736	108508_3099_00539	108524_3325_00562	108528_3330_01273	108546_3348_01254	112371_CAM000139_1663_01042
g02068_00005__g02068	ribH	6%2C7-dimethyl-8-ribityllumazine synthase	460	0	1	56	3	NA	NA		ribH(461)	231	465	105577_PA010_00297	105578_PA017_00449	105579_PA026_01117	105580_PA028_00208	105581_PA029_01446	105583_PA031_01239;105583_PA031_01946	105584_PA032_00335	105585_PA033_00782	105586_PA034_00595	105587_PA040_00216	105590_PA048_00200	105593_PA061_00756	105594_PA062_01296	105597_PA065_00046	105601_PA070_00495	105614_PA093_00325	105616_PV004_01027	105636_PV086_01624	105640_PV091_00132	105642_PV093_00134	105746_cerdo_0_1_C1_01051	105747_cerdo_0_1_C2_00776	108479_3070_00694	108481_3072_00804	108483_3074_00365	108486_3077_01462	108491_3082_00191	108492_3083_00109	108494_3085_01211	108498_3089_00690	108504_3095_00737	108508_3099_00540	108524_3325_00563	108528_3330_01274	108546_3348_01253	112371_CAM000139_1663_01041
g01399_00001__g01399	NA	hypothetical protein	460	0	1	57	1	NA	NA		NA(460)	198	294	105577_PA010_00132	105578_PA017_00865	105579_PA026_01470	105580_PA028_00906	105581_PA029_00131	105583_PA031_00494	105584_PA032_00480	105585_PA033_00136	105586_PA034_00563	105587_PA040_00974	105590_PA048_00764	105593_PA061_00131	105594_PA062_00304	105597_PA065_00614	105601_PA070_00893	105614_PA093_00911	105616_PV004_00937	105636_PV086_01142	105640_PV091_01033	105642_PV093_00845	105746_cerdo_0_1_C1_01244	105747_cerdo_0_1_C2_01221	108479_3070_00347	108481_3072_00861	108483_3074_01195	108486_3077_00700	108491_3082_01062	108492_3083_01424	108494_3085_00237	108498_3089_00330	108504_3095_00665	108508_3099_01343	108524_3325_00785	108528_3330_00450	108546_3348_00639	112371_CAM000139_1663_01236
g01834_00005__g01834	infB	Translation initiation factor IF-2	460	0	1	57	2	NA	NA		infB(461)	1116	2583	105577_PA010_00133	105578_PA017_00866	105579_PA026_01471	105580_PA028_00907	105581_PA029_00132	105583_PA031_00495	105584_PA032_00481	105585_PA033_00137	105586_PA034_00564	105587_PA040_00973	105590_PA048_00765	105593_PA061_00132	105594_PA062_00305	105597_PA065_00615	105601_PA070_00894	105614_PA093_00912	105616_PV004_00938	105636_PV086_01143	105640_PV091_01034	105642_PV093_00846	105746_cerdo_0_1_C1_01245	105747_cerdo_0_1_C2_01222	108479_3070_00346	108481_3072_00860	108483_3074_01196	108486_3077_00699	108491_3082_01063	108492_3083_01423	108494_3085_00236	108498_3089_00331	108504_3095_00664	108508_3099_01342	108524_3325_00784	108528_3330_00449	108546_3348_00640	112371_CAM000139_1663_01235
g02113_00005__g02113	rbfA	Ribosome-binding factor A	460	0	1	57	3	NA	NA		rbfA(460)	360	363	105577_PA010_00134	105578_PA017_00867	105579_PA026_01472	105580_PA028_00908	105581_PA029_00133	105583_PA031_00496	105584_PA032_00482	105585_PA033_00138	105586_PA034_00565	105587_PA040_00972	105590_PA048_00766	105593_PA061_00133	105594_PA062_00306	105597_PA065_00616	105601_PA070_00895	105614_PA093_00913	105616_PV004_00939	105636_PV086_01144	105640_PV091_01035	105642_PV093_00847	105746_cerdo_0_1_C1_01246	105747_cerdo_0_1_C2_01223	108479_3070_00345	108481_3072_00859	108483_3074_01197	108486_3077_00698	108491_3082_01064	108492_3083_01422	108494_3085_00235	108498_3089_00332	108504_3095_00663	108508_3099_01341	108524_3325_00783	108528_3330_00448	108546_3348_00641	112371_CAM000139_1663_01234
g01104_00005__g01104	fliS	Flagellar secretion chaperone FliS	460	0	1	58	1	NA	NA		fliS(460)	384	387	105577_PA010_00240	105578_PA017_00289	105579_PA026_00734	105580_PA028_00604	105581_PA029_01194	105583_PA031_00100	105584_PA032_00052	105585_PA033_00656	105586_PA034_00149	105587_PA040_00055	105590_PA048_00600	105593_PA061_00858	105594_PA062_00114	105597_PA065_01465	105601_PA070_00731	105614_PA093_00050	105616_PV004_00853	105636_PV086_00543	105640_PV091_00230	105642_PV093_00906	105746_cerdo_0_1_C1_00570	105747_cerdo_0_1_C2_00613	108479_3070_00313	108481_3072_00011	108483_3074_00174	108486_3077_00212	108491_3082_00088	108492_3083_00004	108494_3085_00216	108498_3089_01229	108504_3095_01297	108508_3099_00032	108524_3325_00093	108528_3330_00075	108546_3348_01155	112371_CAM000139_1663_00590
g00895_00001__g00895	NA	hypothetical protein	460	0	1	58	2	NA	NA		NA(460)	273	276	105577_PA010_00241	105578_PA017_00288	105579_PA026_00735	105580_PA028_00605	105581_PA029_01195	105583_PA031_00101	105584_PA032_00051	105585_PA033_00657	105586_PA034_00148	105587_PA040_00054	105590_PA048_00601	105593_PA061_00859	105594_PA062_00115	105597_PA065_01466	105601_PA070_00732	105614_PA093_00049	105616_PV004_00854	105636_PV086_00544	105640_PV091_00229	105642_PV093_00905	105746_cerdo_0_1_C1_00571	105747_cerdo_0_1_C2_00612	108479_3070_00314	108481_3072_00010	108483_3074_00175	108486_3077_00211	108491_3082_00089	108492_3083_00005	108494_3085_00215	108498_3089_01228	108504_3095_01296	108508_3099_00031	108524_3325_00094	108528_3330_00074	108546_3348_01154	112371_CAM000139_1663_00589
g01649_00005__g01649	efp	Elongation factor P	460	0	1	58	3	NA	NA		efp(460)	555	579	105577_PA010_00242	105578_PA017_00287	105579_PA026_00736	105580_PA028_00606	105581_PA029_01196	105583_PA031_00102	105584_PA032_00050	105585_PA033_00658	105586_PA034_00147	105587_PA040_00053	105590_PA048_00602	105593_PA061_00860	105594_PA062_00116	105597_PA065_01467	105601_PA070_00733	105614_PA093_00048	105616_PV004_00855	105636_PV086_00545	105640_PV091_00228	105642_PV093_00904	105746_cerdo_0_1_C1_00572	105747_cerdo_0_1_C2_00611	108479_3070_00315	108481_3072_00009	108483_3074_00176	108486_3077_00210	108491_3082_00090	108492_3083_00006	108494_3085_00214	108498_3089_01227	108504_3095_01295	108508_3099_00030	108524_3325_00095	108528_3330_00073	108546_3348_01296	112371_CAM000139_1663_00588
g00843_00005__g00843	exbB	Biopolymer transport protein ExbB	460	0	1	59	1	NA	NA		exbB(462)	192	762	105577_PA010_01032	105578_PA017_01394	105579_PA026_01501	105580_PA028_01210	105581_PA029_01165	105583_PA031_00874	105584_PA032_00845	105585_PA033_01419	105586_PA034_01457	105587_PA040_00947	105590_PA048_01593	105593_PA061_01588	105594_PA062_00884	105597_PA065_01650	105601_PA070_01552	105614_PA093_01276	105616_PV004_00900	105636_PV086_01733	105640_PV091_01359	105642_PV093_01219	105746_cerdo_0_1_C1_01731	105747_cerdo_0_1_C2_01708	108479_3070_01044	108481_3072_00695	108483_3074_00955	108486_3077_00376	108491_3082_00780	108492_3083_00367	108494_3085_00258	108498_3089_00957	108504_3095_00446	108508_3099_00827	108524_3325_00484	108528_3330_01375	108546_3348_00715	112371_CAM000139_1663_01575
g00461_00004__g00461	NA	hypothetical protein	460	0	1	59	2	NA	NA		NA(462)	144	852	105577_PA010_01030	105578_PA017_01392	105579_PA026_01503	105580_PA028_01208	105581_PA029_01167	105583_PA031_00872	105584_PA032_00843	105585_PA033_01421	105586_PA034_01459	105587_PA040_00945	105590_PA048_01595	105593_PA061_01590	105594_PA062_00882	105597_PA065_01652	105601_PA070_01550	105614_PA093_01274	105616_PV004_00898	105636_PV086_01731	105640_PV091_01357	105642_PV093_01217	105746_cerdo_0_1_C1_01729	105747_cerdo_0_1_C2_01706	108479_3070_01046	108481_3072_00697	108483_3074_00953	108486_3077_00378	108491_3082_01456	108492_3083_00369	108494_3085_01275	108498_3089_00958	108504_3095_00448	108508_3099_00443	108524_3325_00486	108528_3330_01404	108546_3348_01497	112371_CAM000139_1663_01577
g00064_00006__g00064	NA	hypothetical protein	460	0	1	60	1	NA	NA		NA(460)	312	1302	105577_PA010_00019	105578_PA017_00752	105579_PA026_00303	105580_PA028_01494	105581_PA029_00019	105583_PA031_00762	105584_PA032_00974	105585_PA033_00019	105586_PA034_00790	105587_PA040_01133	105590_PA048_00652	105593_PA061_00019	105594_PA062_00721	105597_PA065_00502	105601_PA070_00781	105614_PA093_01125	105616_PV004_01126	105636_PV086_01030	105640_PV091_01199	105642_PV093_01009	105746_cerdo_0_1_C1_01118	105747_cerdo_0_1_C2_01095	108479_3070_00935	108481_3072_00967	108483_3074_00846	108486_3077_00714	108491_3082_00267	108492_3083_01076	108494_3085_00172	108498_3089_00723	108504_3095_00417	108508_3099_00224	108524_3325_00182	108528_3330_00125	108546_3348_01542	112371_CAM000139_1663_01348
g01480_00005__g01480	gltB	Ferredoxin-dependent glutamate synthase 1	460	0	1	60	2	NA	NA		gltB(460):NA(1)	234	4491	105577_PA010_00018	105578_PA017_00751	105579_PA026_00302	105580_PA028_01493	105581_PA029_00018	105583_PA031_00761	105584_PA032_00975	105585_PA033_00018	105586_PA034_00791	105587_PA040_01132	105590_PA048_00651	105593_PA061_00018	105594_PA062_00720	105597_PA065_00501	105601_PA070_00780	105614_PA093_01124	105616_PV004_01125	105636_PV086_01029	105640_PV091_01198	105642_PV093_01008	105746_cerdo_0_1_C1_01117	105747_cerdo_0_1_C2_01094	108479_3070_00936	108481_3072_00966	108483_3074_00927	108486_3077_00715	108491_3082_00266	108492_3083_01075	108494_3085_00173	108498_3089_00722	108504_3095_00416	108508_3099_00225	108524_3325_00183	108528_3330_00126	108546_3348_00894	112371_CAM000139_1663_01349
g00643_2_00005__g00643_2	NA	hypothetical protein	460	0	1	61	1	NA	NA		NA(460)	960	1212	105577_PA010_00490	105578_PA017_00941	105579_PA026_00449	105580_PA028_00987	105581_PA029_00579	105583_PA031_01388	105584_PA032_00282	105585_PA033_00691	105586_PA034_00420	105587_PA040_00597	105590_PA048_00817	105593_PA061_00652	105594_PA062_00398	105597_PA065_00370	105601_PA070_00321	105614_PA093_00618	105616_PV004_01132	105636_PV086_00950	105640_PV091_00710	105642_PV093_00702	105746_cerdo_0_1_C1_01500	105747_cerdo_0_1_C2_01526	108479_3070_01327	108481_3072_00528	108483_3074_00708	108486_3077_00319	108491_3082_00938	108492_3083_00743	108494_3085_00186	108498_3089_01488	108504_3095_00821	108508_3099_00492	108524_3325_00019	108528_3330_00772	108546_3348_01004	112371_CAM000139_1663_00767
g00931_1_00005__g00931_1	purA	Adenylosuccinate synthetase	460	0	1	61	2	NA	NA		purA(460)	468	1251	105577_PA010_00491	105578_PA017_00942	105579_PA026_00450	105580_PA028_00988	105581_PA029_00580	105583_PA031_01389	105584_PA032_00283	105585_PA033_00692	105586_PA034_00421	105587_PA040_00598	105590_PA048_00818	105593_PA061_00653	105594_PA062_00399	105597_PA065_00371	105601_PA070_00322	105614_PA093_00619	105616_PV004_01131	105636_PV086_00951	105640_PV091_00709	105642_PV093_00703	105746_cerdo_0_1_C1_01499	105747_cerdo_0_1_C2_01527	108479_3070_01326	108481_3072_00527	108483_3074_00707	108486_3077_00318	108491_3082_00939	108492_3083_00744	108494_3085_00185	108498_3089_01487	108504_3095_00822	108508_3099_00493	108524_3325_00018	108528_3330_00771	108546_3348_01454	112371_CAM000139_1663_00768
g01155_00005__g01155	cydA	Cytochrome bd-I ubiquinol oxidase subunit 1	460	0	1	62	1	NA	NA		cydA(458):appC(2)	579	1563	105577_PA010_01475	105578_PA017_00713	105579_PA026_01003	105580_PA028_00719	105581_PA029_00994	105583_PA031_00720	105584_PA032_01290	105585_PA033_01808	105586_PA034_00371	105587_PA040_00894	105590_PA048_01274	105593_PA061_00973	105594_PA062_00991	105597_PA065_00750	105601_PA070_01035	105614_PA093_01534	105616_PV004_00357	105636_PV086_00862	105640_PV091_00483	105642_PV093_00990	105746_cerdo_0_1_C1_00772	105747_cerdo_0_1_C2_01055	108479_3070_01580	108481_3072_01715	108483_3074_00656	108486_3077_01409	108491_3082_01344	108492_3083_01337	108494_3085_01214	108498_3089_01624	108504_3095_01377	108508_3099_00076	108524_3325_00948	108528_3330_01350	108546_3348_01167	112371_CAM000139_1663_01099
g00652_00003__g00652	cydB	Cytochrome bd-I ubiquinol oxidase subunit 2	460	0	1	62	2	NA	NA		cydB(458):NA(2)	246	1125	105577_PA010_01474	105578_PA017_00712	105579_PA026_01002	105580_PA028_00718	105581_PA029_00995	105583_PA031_00719	105584_PA032_01289	105585_PA033_01807	105586_PA034_00370	105587_PA040_00893	105590_PA048_01273	105593_PA061_00972	105594_PA062_00992	105597_PA065_00749	105601_PA070_01034	105614_PA093_01533	105616_PV004_00356	105636_PV086_00861	105640_PV091_00482	105642_PV093_00989	105746_cerdo_0_1_C1_00773	105747_cerdo_0_1_C2_01054	108479_3070_01581	108481_3072_01714	108483_3074_00655	108486_3077_01408	108491_3082_01343	108492_3083_01336	108494_3085_01215	108498_3089_01625	108504_3095_01376	108508_3099_00077	108524_3325_00947	108528_3330_01349	108546_3348_01166	112371_CAM000139_1663_01100
g00700_00005__g00700	NA	hypothetical protein	460	0	1	63	1	NA	NA		NA(460)	381	600	105577_PA010_00035	105578_PA017_00769	105579_PA026_00319	105580_PA028_01460	105581_PA029_00035	105583_PA031_00778	105584_PA032_00958	105585_PA033_00035	105586_PA034_00774	105587_PA040_01149	105590_PA048_00668	105593_PA061_00035	105594_PA062_00737	105597_PA065_00518	105601_PA070_00797	105614_PA093_01141	105616_PV004_01092	105636_PV086_01046	105640_PV091_01215	105642_PV093_01026	105746_cerdo_0_1_C1_01135	105747_cerdo_0_1_C2_01112	108479_3070_01085	108481_3072_00910	108483_3074_00830	108486_3077_00793	108491_3082_00837	108492_3083_00415	108494_3085_00104	108498_3089_00739	108504_3095_01467	108508_3099_00941	108524_3325_01065	108528_3330_00492	108546_3348_00665	112371_CAM000139_1663_01332
g01690_00005__g01690	queF	NADPH-dependent 7-cyano-7-deazaguanine reductase	460	0	1	63	2	NA	NA		queF(460)	339	450	105577_PA010_00036	105578_PA017_00770	105579_PA026_00320	105580_PA028_01459	105581_PA029_00036	105583_PA031_00779	105584_PA032_00957	105585_PA033_00036	105586_PA034_00773	105587_PA040_01150	105590_PA048_00669	105593_PA061_00036	105594_PA062_00738	105597_PA065_00519	105601_PA070_00798	105614_PA093_01142	105616_PV004_01091	105636_PV086_01047	105640_PV091_01216	105642_PV093_01027	105746_cerdo_0_1_C1_01136	105747_cerdo_0_1_C2_01113	108479_3070_01086	108481_3072_00911	108483_3074_00829	108486_3077_00794	108491_3082_00836	108492_3083_00414	108494_3085_00105	108498_3089_01446	108504_3095_01468	108508_3099_00940	108524_3325_01066	108528_3330_00491	108546_3348_00666	112371_CAM000139_1663_01331
g00023_00006__g00023	hisG	ATP phosphoribosyltransferase	460	0	1	64	1	NA	NA		hisG(460)	573	900	105577_PA010_00379	105578_PA017_00619	105579_PA026_01230	105580_PA028_00625	105581_PA029_00660	105583_PA031_01257	105584_PA032_01131	105585_PA033_01037	105586_PA034_00278	105587_PA040_01090	105590_PA048_01040	105593_PA061_00578	105594_PA062_00748	105597_PA065_00657	105601_PA070_00942	105614_PA093_00194	105616_PV004_00182	105636_PV086_00768	105640_PV091_00390	105642_PV093_01461	105746_cerdo_0_1_C1_00871	105747_cerdo_0_1_C2_00956	108479_3070_00206	108481_3072_00260	108483_3074_00569	108486_3077_01268	108491_3082_00581	108492_3083_01071	108494_3085_00748	108498_3089_00146	108504_3095_00218	108508_3099_00362	108524_3325_00515	108528_3330_00198	108546_3348_01014	112371_CAM000139_1663_01192
g01184_1_00006__g01184_1	hisD	Histidinol dehydrogenase	460	0	1	64	2	NA	NA		hisD(461)	195	1287	105577_PA010_00380	105578_PA017_00620	105579_PA026_01231	105580_PA028_00626	105581_PA029_00661	105583_PA031_01258	105584_PA032_01132	105585_PA033_01038	105586_PA034_00279	105587_PA040_01091	105590_PA048_01041	105593_PA061_00579	105594_PA062_00749	105597_PA065_00658	105601_PA070_00943	105614_PA093_00195	105616_PV004_00183	105636_PV086_00769	105640_PV091_00391	105642_PV093_01462	105746_cerdo_0_1_C1_00870	105747_cerdo_0_1_C2_00957	108479_3070_00207	108481_3072_00259	108483_3074_00568	108486_3077_01269	108491_3082_00580	108492_3083_01070	108494_3085_00747	108498_3089_00145	108504_3095_00219	108508_3099_00363	108524_3325_00514	108528_3330_00197	108546_3348_01013	112371_CAM000139_1663_01191
g01506_00005__g01506	tyrS	Tyrosine--tRNA ligase	460	0	1	65	1	NA	NA		tyrS(460)	1206	1206	105577_PA010_01459	105578_PA017_00268	105579_PA026_01148	105580_PA028_00455	105581_PA029_00712	105583_PA031_01016	105584_PA032_00032	105585_PA033_00885	105586_PA034_00129	105587_PA040_00030	105590_PA048_00460	105593_PA061_01022	105594_PA062_01120	105597_PA065_00306	105601_PA070_01435	105614_PA093_00029	105616_PV004_00128	105636_PV086_00717	105640_PV091_00209	105642_PV093_00885	105746_cerdo_0_1_C1_00592	105747_cerdo_0_1_C2_00591	108479_3070_00334	108481_3072_00542	108483_3074_00195	108486_3077_00417	108491_3082_00029	108492_3083_00025	108494_3085_00316	108498_3089_00791	108504_3095_00050	108508_3099_00011	108524_3325_00114	108528_3330_00803	108546_3348_00405	112371_CAM000139_1663_00569
g00018_00006__g00018	NA	hypothetical protein	460	0	1	65	2	NA	NA		NA(460)	453	1092	105577_PA010_01458	105578_PA017_00267	105579_PA026_01147	105580_PA028_00454	105581_PA029_00711	105583_PA031_01015	105584_PA032_00031	105585_PA033_00884	105586_PA034_00128	105587_PA040_00029	105590_PA048_00459	105593_PA061_01021	105594_PA062_01119	105597_PA065_00305	105601_PA070_01434	105614_PA093_00028	105616_PV004_00127	105636_PV086_00716	105640_PV091_00208	105642_PV093_00884	105746_cerdo_0_1_C1_00593	105747_cerdo_0_1_C2_00590	108479_3070_00335	108481_3072_00543	108483_3074_00196	108486_3077_00418	108491_3082_00028	108492_3083_00026	108494_3085_00317	108498_3089_00792	108504_3095_00051	108508_3099_00010	108524_3325_00115	108528_3330_00804	108546_3348_00404	112371_CAM000139_1663_00568
g01556_00005__g01556	fmt	Methionyl-tRNA formyltransferase	460	0	1	66	1	NA	NA		fmt(460)	507	921	105577_PA010_00093	105578_PA017_00827	105579_PA026_00377	105580_PA028_00868	105581_PA029_00093	105583_PA031_00453	105584_PA032_00442	105585_PA033_00095	105586_PA034_00525	105587_PA040_01209	105590_PA048_00726	105593_PA061_00093	105594_PA062_00266	105597_PA065_00576	105601_PA070_00855	105614_PA093_00872	105616_PV004_00647	105636_PV086_01104	105640_PV091_00995	105642_PV093_00807	105746_cerdo_0_1_C1_01205	105747_cerdo_0_1_C2_01182	108479_3070_00385	108481_3072_00899	108483_3074_00321	108486_3077_00041	108491_3082_00124	108492_3083_00145	108494_3085_01425	108498_3089_00292	108504_3095_00753	108508_3099_00742	108524_3325_00315	108528_3330_00510	108546_3348_01042	112371_CAM000139_1663_01274
g01327_00005__g01327	birA	Bifunctional ligase/repressor BirA	460	0	1	66	2	NA	NA		birA(460)	636	654	105577_PA010_00094	105578_PA017_00828	105579_PA026_00378	105580_PA028_00869	105581_PA029_00094	105583_PA031_00454	105584_PA032_00443	105585_PA033_00096	105586_PA034_00526	105587_PA040_01210	105590_PA048_00727	105593_PA061_00094	105594_PA062_00267	105597_PA065_00577	105601_PA070_00856	105614_PA093_00873	105616_PV004_00648	105636_PV086_01105	105640_PV091_00996	105642_PV093_00808	105746_cerdo_0_1_C1_01206	105747_cerdo_0_1_C2_01183	108479_3070_00384	108481_3072_00898	108483_3074_00322	108486_3077_00042	108491_3082_00123	108492_3083_00144	108494_3085_01424	108498_3089_00293	108504_3095_00754	108508_3099_00743	108524_3325_00316	108528_3330_00511	108546_3348_01043	112371_CAM000139_1663_01273
g01808_00006__g01808	aspA	Aspartate ammonia-lyase	460	0	1	67	1	NA	NA		aspA(460)	459	1419	105577_PA010_00467	105578_PA017_00706	105579_PA026_00996	105580_PA028_00712	105581_PA029_01001	105583_PA031_00716	105584_PA032_01087	105585_PA033_01341	105586_PA034_00364	105587_PA040_00890	105590_PA048_01267	105593_PA061_00966	105594_PA062_00998	105597_PA065_00743	105601_PA070_01028	105614_PA093_01527	105616_PV004_00350	105636_PV086_00855	105640_PV091_00476	105642_PV093_00983	105746_cerdo_0_1_C1_00779	105747_cerdo_0_1_C2_01048	108479_3070_01550	108481_3072_01408	108483_3074_00649	108486_3077_00499	108491_3082_01367	108492_3083_00810	108494_3085_01166	108498_3089_00615	108504_3095_01231	108508_3099_00083	108524_3325_00851	108528_3330_01298	108546_3348_01353	112371_CAM000139_1663_01106
g00234_1_00007__g00234_1	dcuA	Anaerobic C4-dicarboxylate transporter DcuA	460	0	1	67	2	NA	NA		dcuA(464):NA(1)	252	1707	105577_PA010_00466	105578_PA017_00705	105579_PA026_00995	105580_PA028_00711	105581_PA029_01002	105583_PA031_00715	105584_PA032_01088	105585_PA033_01340	105586_PA034_00363	105587_PA040_00889	105590_PA048_01266	105593_PA061_00965	105594_PA062_00999	105597_PA065_00742	105601_PA070_01027	105614_PA093_01526	105616_PV004_00349	105636_PV086_00854	105640_PV091_00475	105642_PV093_00982	105746_cerdo_0_1_C1_00780	105747_cerdo_0_1_C2_01047	108479_3070_01551	108481_3072_01409	108483_3074_00648	108486_3077_00500	108491_3082_01368	108492_3083_00811	108494_3085_01167	108498_3089_00614	108504_3095_01232	108508_3099_00084	108524_3325_00850	108528_3330_01297	108546_3348_01352	112371_CAM000139_1663_01107
g00054_00006__g00054	NA	hypothetical protein	460	0	1	68	1	NA	NA		NA(460)	375	375	105577_PA010_01683	105578_PA017_01754	105579_PA026_00838	105580_PA028_01692	105581_PA029_01628	105583_PA031_01659	105584_PA032_01507	105585_PA033_01666	105586_PA034_01598	105587_PA040_01257	105590_PA048_01449	105593_PA061_01747	105594_PA062_01647	105597_PA065_01417	105601_PA070_01803	105614_PA093_01705	105616_PV004_01256	105636_PV086_01573	105640_PV091_00589	105642_PV093_01662	105746_cerdo_0_1_C1_00008	105747_cerdo_0_1_C2_00447	108479_3070_01343	108481_3072_00407	108483_3074_01288	108486_3077_01188	108491_3082_00718	108492_3083_00880	108494_3085_00591	108498_3089_01338	108504_3095_00792	108508_3099_01413	108524_3325_01148	108528_3330_01003	108546_3348_00415	112371_CAM000139_1663_00008
g00746_00005__g00746	kefC	Glutathione-regulated potassium-efflux system protein KefC	460	0	1	68	2	NA	NA		kefC(459):ybaL(2):NA(1)	357	1623	105577_PA010_01684	105578_PA017_01755	105579_PA026_00837	105580_PA028_01693	105581_PA029_01629	105583_PA031_01660	105584_PA032_01508	105585_PA033_01667	105586_PA034_01599	105587_PA040_01258	105590_PA048_01450	105593_PA061_01748	105594_PA062_01648	105597_PA065_01418	105601_PA070_01804	105614_PA093_01706	105616_PV004_01255	105636_PV086_01572	105640_PV091_00588	105642_PV093_01663	105746_cerdo_0_1_C1_00007	105747_cerdo_0_1_C2_00448	108479_3070_01342	108481_3072_00408	108483_3074_01289	108486_3077_01187	108491_3082_00719	108492_3083_00881	108494_3085_00592	108498_3089_01339	108504_3095_00793	108508_3099_01412	108524_3325_01147	108528_3330_01002	108546_3348_00414	112371_CAM000139_1663_00007
g00173_00004__g00173	hldE	Bifunctional protein HldE	460	0	1	69	1	NA	NA		hldE(462)	189	1386	105577_PA010_01159	105578_PA017_00157	105579_PA026_01344	105580_PA028_00814	105581_PA029_01076	105583_PA031_00235;105583_PA031_01944	105584_PA032_00983	105585_PA033_00448	105586_PA034_01245	105587_PA040_01495	105590_PA048_01175	105593_PA061_01383	105594_PA062_01718	105597_PA065_00900	105601_PA070_00175	105614_PA093_01349	105616_PV004_00658	105636_PV086_00348	105640_PV091_01423	105642_PV093_01285	105746_cerdo_0_1_C1_00097	105747_cerdo_0_1_C2_00358	108479_3070_00744	108481_3072_01156	108483_3074_00087	108486_3077_01403	108491_3082_01237	108492_3083_01125	108494_3085_01138	108498_3089_00465	108504_3095_01444	108508_3099_00979	108524_3325_00045	108528_3330_00272	108546_3348_00239	112371_CAM000139_1663_00096
g00122_1_00016__g00122_1	gmhA1	Phosphoheptose isomerase 1	460	0	1	69	2	NA	NA		gmhA1(462)	258	561	105577_PA010_01158	105578_PA017_00156	105579_PA026_01343	105580_PA028_00815	105581_PA029_01075	105583_PA031_00234;105583_PA031_01943	105584_PA032_00982	105585_PA033_00447	105586_PA034_01244	105587_PA040_01494	105590_PA048_01176	105593_PA061_01382	105594_PA062_01717	105597_PA065_00899	105601_PA070_00174	105614_PA093_01348	105616_PV004_00657	105636_PV086_00347	105640_PV091_01422	105642_PV093_01284;105642_PV093_01847	105746_cerdo_0_1_C1_00098	105747_cerdo_0_1_C2_00357	108479_3070_00743	108481_3072_01155	108483_3074_00086	108486_3077_01404	108491_3082_01236	108492_3083_01124	108494_3085_01139	108498_3089_00464	108504_3095_01443	108508_3099_00978	108524_3325_00044	108528_3330_00271	108546_3348_00238	112371_CAM000139_1663_00097
g00938_00005__g00938	napA	Periplasmic nitrate reductase	460	0	1	70	1	NA	NA		napA(461)	471	2775	105577_PA010_01230	105578_PA017_01360	105579_PA026_00794	105580_PA028_00936	105581_PA029_00447	105583_PA031_01144	105584_PA032_01073	105585_PA033_00217	105586_PA034_00726	105587_PA040_01015	105590_PA048_00957	105593_PA061_00896	105594_PA062_00485	105597_PA065_01285	105601_PA070_01367	105614_PA093_00717	105616_PV004_00290	105636_PV086_01358	105640_PV091_00844	105642_PV093_00370	105746_cerdo_0_1_C1_01453	105747_cerdo_0_1_C2_01430	108479_3070_00466	108481_3072_00311	108483_3074_00460	108486_3077_00957	108491_3082_00228	108492_3083_00828	108494_3085_00554	108498_3089_01250	108504_3095_01280	108508_3099_00450	108524_3325_00544	108528_3330_01039	108546_3348_01051	112371_CAM000139_1663_01467
g01305_00005__g01305	napG	Ferredoxin-type protein NapG	460	0	1	70	2	NA	NA		napG(460)	408	741	105577_PA010_01229	105578_PA017_01359	105579_PA026_00795	105580_PA028_00937	105581_PA029_00448	105583_PA031_01143	105584_PA032_01074	105585_PA033_00216	105586_PA034_00727	105587_PA040_01016	105590_PA048_00956	105593_PA061_00897	105594_PA062_00486	105597_PA065_01286	105601_PA070_01368	105614_PA093_00716	105616_PV004_00289	105636_PV086_01357	105640_PV091_00843	105642_PV093_00369	105746_cerdo_0_1_C1_01452	105747_cerdo_0_1_C2_01429	108479_3070_00465	108481_3072_00312	108483_3074_00459	108486_3077_00956	108491_3082_00227	108492_3083_00829	108494_3085_00555	108498_3089_01249	108504_3095_01279	108508_3099_00451	108524_3325_00543	108528_3330_01038	108546_3348_01050	112371_CAM000139_1663_01468
g02105_00006__g02105	rpsL	30S ribosomal protein S12	460	0	1	71	1	NA	NA		rpsL(460)	198	387	105577_PA010_00185	105578_PA017_00344	105579_PA026_01623	105580_PA028_00549	105581_PA029_00285	105583_PA031_00572	105584_PA032_00107	105585_PA033_00965	105586_PA034_00204	105587_PA040_00110	105590_PA048_00545	105593_PA061_00803	105594_PA062_00059	105597_PA065_00809	105601_PA070_00676	105614_PA093_00105	105616_PV004_01594	105636_PV086_00488	105640_PV091_00285	105642_PV093_00544	105746_cerdo_0_1_C1_00515	105747_cerdo_0_1_C2_00668	108479_3070_00568	108481_3072_00066	108483_3074_00051	108486_3077_00067	108491_3082_00711	108492_3083_00851	108494_3085_00068	108498_3089_00052	108504_3095_00507	108508_3099_00332	108524_3325_00807	108528_3330_01346	108546_3348_00858	112371_CAM000139_1663_00645
g00030_00006__g00030	rpsG	30S ribosomal protein S7	460	0	1	71	2	NA	NA		rpsG(460)	384	471	105577_PA010_00186	105578_PA017_00343	105579_PA026_01622	105580_PA028_00550	105581_PA029_00286	105583_PA031_00571	105584_PA032_00106	105585_PA033_00964	105586_PA034_00203	105587_PA040_00109	105590_PA048_00546	105593_PA061_00804	105594_PA062_00060	105597_PA065_00810	105601_PA070_00677	105614_PA093_00104	105616_PV004_01595	105636_PV086_00489	105640_PV091_00284	105642_PV093_00545	105746_cerdo_0_1_C1_00516	105747_cerdo_0_1_C2_00667	108479_3070_00567	108481_3072_00065	108483_3074_00050	108486_3077_00066	108491_3082_00710	108492_3083_00852	108494_3085_00067	108498_3089_00051	108504_3095_00506	108508_3099_00331	108524_3325_00808	108528_3330_01347	108546_3348_00859	112371_CAM000139_1663_00644
g01605_00004__g01605	fliA	RNA polymerase sigma factor FliA	460	0	1	72	1	NA	NA		fliA(460)	693	717	105577_PA010_01491	105578_PA017_00729	105579_PA026_01019	105580_PA028_01794	105581_PA029_01467	105583_PA031_00736	105584_PA032_01306	105585_PA033_01632	105586_PA034_00387	105587_PA040_00910	105590_PA048_01290	105593_PA061_00989	105594_PA062_01522	105597_PA065_01715	105601_PA070_01736	105614_PA093_01550	105616_PV004_00373	105636_PV086_00878	105640_PV091_00499	105642_PV093_01548	105746_cerdo_0_1_C1_00756	105747_cerdo_0_1_C2_01071	108479_3070_01367	108481_3072_01566	108483_3074_01011	108486_3077_00856	108491_3082_01053	108492_3083_00471	108494_3085_00229	108498_3089_01138	108504_3095_00585	108508_3099_00795	108524_3325_00890	108528_3330_00547	108546_3348_00636	112371_CAM000139_1663_01083
g01877_00005__g01877	fliM	Flagellar motor switch protein FliM	460	0	1	72	2	NA	NA		fliM(460)	1077	1083	105577_PA010_01492	105578_PA017_00730	105579_PA026_01020	105580_PA028_01795	105581_PA029_01468	105583_PA031_00737	105584_PA032_01307	105585_PA033_01633	105586_PA034_00388	105587_PA040_00911	105590_PA048_01291	105593_PA061_00990	105594_PA062_01523	105597_PA065_01716	105601_PA070_01737	105614_PA093_01551	105616_PV004_00374	105636_PV086_00879	105640_PV091_00500	105642_PV093_01549	105746_cerdo_0_1_C1_00755	105747_cerdo_0_1_C2_01072	108479_3070_01368	108481_3072_01567	108483_3074_01010	108486_3077_00855	108491_3082_01054	108492_3083_00470	108494_3085_00230	108498_3089_01137	108504_3095_00584	108508_3099_00794	108524_3325_00889	108528_3330_00546	108546_3348_00637	112371_CAM000139_1663_01082
g01953_00004__g01953	frdC	Fumarate reductase cytochrome b subunit	460	0	1	73	1	NA	NA		frdC(460)	783	786	105577_PA010_00272	105578_PA017_00424	105579_PA026_01092	105580_PA028_00183	105581_PA029_01242	105583_PA031_01214	105584_PA032_00927	105585_PA033_00757	105586_PA034_00570	105587_PA040_00191	105590_PA048_00175	105593_PA061_00731	105594_PA062_01271	105597_PA065_00021	105601_PA070_00470	105614_PA093_00300	105616_PV004_01002	105636_PV086_01599	105640_PV091_00157	105642_PV093_00159	105746_cerdo_0_1_C1_01076	105747_cerdo_0_1_C2_00751	108479_3070_00669	108481_3072_00779	108483_3074_00390	108486_3077_00742	108491_3082_00166	108492_3083_00084	108494_3085_00723	108498_3089_00665	108504_3095_00277	108508_3099_01267	108524_3325_00681	108528_3330_00400	108546_3348_00909	112371_CAM000139_1663_01066
g00024_00006__g00024	frdA	Fumarate reductase flavoprotein subunit	460	0	1	73	2	NA	NA		frdA(460)	1992	1992	105577_PA010_00271	105578_PA017_00423	105579_PA026_01091	105580_PA028_00182	105581_PA029_01243	105583_PA031_01213	105584_PA032_00928	105585_PA033_00756	105586_PA034_00569	105587_PA040_00190	105590_PA048_00174	105593_PA061_00730	105594_PA062_01270	105597_PA065_00020	105601_PA070_00469	105614_PA093_00299	105616_PV004_01001	105636_PV086_01598	105640_PV091_00158	105642_PV093_00160	105746_cerdo_0_1_C1_01077	105747_cerdo_0_1_C2_00750	108479_3070_00668	108481_3072_00778	108483_3074_00391	108486_3077_00741	108491_3082_00165	108492_3083_00083	108494_3085_00724	108498_3089_00664	108504_3095_00278	108508_3099_01268	108524_3325_00680	108528_3330_00401	108546_3348_00910	112371_CAM000139_1663_01067
g01410_00003__g01410	tatA	Sec-independent protein translocase protein TatA	460	0	1	74	1	NA	NA		tatA(460)	240	252	105577_PA010_01180	105578_PA017_00180	105579_PA026_01365	105580_PA028_00793	105581_PA029_01097	105583_PA031_00259	105584_PA032_01004	105585_PA033_00472	105586_PA034_01266	105587_PA040_01518	105590_PA048_01154	105593_PA061_01404	105594_PA062_01369	105597_PA065_00921	105601_PA070_00196	105614_PA093_01370	105616_PV004_00679	105636_PV086_00369	105640_PV091_01446	105642_PV093_01308	105746_cerdo_0_1_C1_00076	105747_cerdo_0_1_C2_00379	108479_3070_00765	108481_3072_01177	108483_3074_00108	108486_3077_00466	108491_3082_00054	108492_3083_00164	108494_3085_00045	108498_3089_00488	108504_3095_00452	108508_3099_00683	108524_3325_00069	108528_3330_01251	108546_3348_00206	112371_CAM000139_1663_00075
g00428_00005__g00428	argS	Arginine--tRNA ligase	460	0	1	74	2	NA	NA		argS(461)	525	1593	105577_PA010_01179	105578_PA017_00179	105579_PA026_01364	105580_PA028_00794	105581_PA029_01096	105583_PA031_00258	105584_PA032_01003	105585_PA033_00471	105586_PA034_01265	105587_PA040_01517	105590_PA048_01155	105593_PA061_01403	105594_PA062_01368	105597_PA065_00920	105601_PA070_00195	105614_PA093_01369	105616_PV004_00678	105636_PV086_00368	105640_PV091_01445	105642_PV093_01307	105746_cerdo_0_1_C1_00077	105747_cerdo_0_1_C2_00378	108479_3070_00764	108481_3072_01176	108483_3074_00107	108486_3077_00465	108491_3082_00053	108492_3083_00163	108494_3085_00046	108498_3089_00487	108504_3095_00453	108508_3099_00682	108524_3325_00068	108528_3330_01250	108546_3348_00205	112371_CAM000139_1663_00076
g00214_1_00004__g00214_1	algC	Phosphomannomutase/phosphoglucomutase	460	0	1	75	1	NA	NA		algC(464)	312	1371	105577_PA010_00557	105578_PA017_01160	105579_PA026_00623	105580_PA028_01141	105581_PA029_00807	105583_PA031_00541;105583_PA031_01954	105584_PA032_00602	105585_PA033_00842	105586_PA034_01193	105587_PA040_01472	105590_PA048_01187	105593_PA061_00280	105594_PA062_00323	105597_PA065_00447	105601_PA070_00398	105614_PA093_00930	105616_PV004_00775	105636_PV086_01160	105640_PV091_01169	105642_PV093_00423	105746_cerdo_0_1_C1_01318	105747_cerdo_0_1_C2_01295	108479_3070_00871	108481_3072_00764	108483_3074_00232	108486_3077_00392	108491_3082_00528	108492_3083_00304	108494_3085_00547	108498_3089_00200	108504_3095_00260	108508_3099_01144	108524_3325_00643	108528_3330_00224	108546_3348_00740	112371_CAM000139_1663_00843
g00861_00005__g00861	NA	hypothetical protein	460	0	1	75	2	NA	NA		NA(461)	294	537	105577_PA010_00556	105578_PA017_01159	105579_PA026_00622	105580_PA028_01140	105581_PA029_00806	105583_PA031_00542	105584_PA032_00603	105585_PA033_00843	105586_PA034_01194	105587_PA040_01471	105590_PA048_01186	105593_PA061_00279	105594_PA062_00322	105597_PA065_00446	105601_PA070_00397	105614_PA093_00929	105616_PV004_00774	105636_PV086_01159	105640_PV091_01170	105642_PV093_00422	105746_cerdo_0_1_C1_01319	105747_cerdo_0_1_C2_01296	108479_3070_00872	108481_3072_00765	108483_3074_00231	108486_3077_00393	108491_3082_00527	108492_3083_00303	108494_3085_00548	108498_3089_00199	108504_3095_00261	108508_3099_01145	108524_3325_00644	108528_3330_00223	108546_3348_00741	112371_CAM000139_1663_00842
g01553_00005__g01553	NA	Ferredoxin--NADP reductase	460	0	1	76	1	NA	NA		NA(460)	552	936	105577_PA010_00245	105578_PA017_00284	105579_PA026_00739	105580_PA028_00609	105581_PA029_01199	105583_PA031_00111	105584_PA032_00047	105585_PA033_00667	105586_PA034_00144	105587_PA040_00045	105590_PA048_00605	105593_PA061_00863	105594_PA062_00119	105597_PA065_01470	105601_PA070_00736	105614_PA093_00045	105616_PV004_00858	105636_PV086_00548	105640_PV091_00225	105642_PV093_00901	105746_cerdo_0_1_C1_00576	105747_cerdo_0_1_C2_00607	108479_3070_00318	108481_3072_00006	108483_3074_00179	108486_3077_00207	108491_3082_00093	108492_3083_00009	108494_3085_00211	108498_3089_01224	108504_3095_01089	108508_3099_00027	108524_3325_00098	108528_3330_00850	108546_3348_01300	112371_CAM000139_1663_00585
g00766_00006__g00766	mepA	Multidrug export protein MepA	460	0	1	76	2	NA	NA		mepA(455):NA(11)	333	1332	105577_PA010_00246;105577_PA010_00247	105578_PA017_00283	105579_PA026_00740	105580_PA028_00610	105581_PA029_01200	105583_PA031_00112	105584_PA032_00046	105585_PA033_00668	105586_PA034_00143	105587_PA040_00044	105590_PA048_00606	105593_PA061_00864	105594_PA062_00120	105597_PA065_01471	105601_PA070_00737	105614_PA093_00044	105616_PV004_00859;105616_PV004_00860	105636_PV086_00549	105640_PV091_00224	105642_PV093_00900	105746_cerdo_0_1_C1_00577	105747_cerdo_0_1_C2_00606	108479_3070_00319	108481_3072_00005	108483_3074_00180	108486_3077_00206	108491_3082_00094	108492_3083_00010	108494_3085_00210	108498_3089_01223	108504_3095_01088	108508_3099_00026	108524_3325_00099	108528_3330_00849	108546_3348_01276	112371_CAM000139_1663_00584
g01534_00005__g01534	asd	Aspartate-semialdehyde dehydrogenase	460	0	1	77	1	NA	NA		asd(317):asd2(143)	570	1032	105577_PA010_00932	105578_PA017_00025	105579_PA026_00118	105580_PA028_00118	105581_PA029_01053	105583_PA031_00838	105584_PA032_01166	105585_PA033_01498	105586_PA034_00661	105587_PA040_01320	105590_PA048_00118	105593_PA061_01271	105594_PA062_00963	105597_PA065_01151	105601_PA070_00050	105614_PA093_00809	105616_PV004_00544	105636_PV086_00218	105640_PV091_00919	105642_PV093_00255	105746_cerdo_0_1_C1_00234	105747_cerdo_0_1_C2_00221	108479_3070_00834	108481_3072_01216	108483_3074_00662	108486_3077_00125	108491_3082_00382	108492_3083_00384	108494_3085_00445	108498_3089_00633	108504_3095_00016	108508_3099_00568	108524_3325_00235	108528_3330_00899	108546_3348_00768	112371_CAM000139_1663_00226
g02051_00005__g02051	NA	hypothetical protein	460	0	1	77	2	NA	NA		NA(461)	339	507	105577_PA010_00933	105578_PA017_00024	105579_PA026_00119	105580_PA028_00119	105581_PA029_01054	105583_PA031_00837	105584_PA032_01167	105585_PA033_01499	105586_PA034_00662	105587_PA040_01319	105590_PA048_00119	105593_PA061_01272	105594_PA062_00964	105597_PA065_01152	105601_PA070_00049	105614_PA093_00810	105616_PV004_00545	105636_PV086_00217	105640_PV091_00918	105642_PV093_00256	105746_cerdo_0_1_C1_00235	105747_cerdo_0_1_C2_00220	108479_3070_00835	108481_3072_01217	108483_3074_00663	108486_3077_00126	108491_3082_00383	108492_3083_00383	108494_3085_00446	108498_3089_00632	108504_3095_00015	108508_3099_00567	108524_3325_00234	108528_3330_00900	108546_3348_00769	112371_CAM000139_1663_00227
g00098_00003__g00098	flgE	hypothetical protein	460	0	1	78	1	NA	NA		NA(238):flgE(223)	876	2634	105577_PA010_00030	105578_PA017_00764	105579_PA026_00314	105580_PA028_01465	105581_PA029_00030	105583_PA031_00773;105583_PA031_01920	105584_PA032_00963	105585_PA033_00030	105586_PA034_00779	105587_PA040_01144	105590_PA048_00663	105593_PA061_00030	105594_PA062_00732	105597_PA065_00513	105601_PA070_00792	105614_PA093_01136	105616_PV004_01097	105636_PV086_01041	105640_PV091_01210	105642_PV093_01021	105746_cerdo_0_1_C1_01130	105747_cerdo_0_1_C2_01107	108479_3070_01080	108481_3072_00905	108483_3074_00835	108486_3077_00788	108491_3082_00842	108492_3083_00420	108494_3085_00099	108498_3089_00734	108504_3095_01040	108508_3099_00946	108524_3325_01060	108528_3330_01128	108546_3348_00660	112371_CAM000139_1663_01337
g00928_1_00007__g00928_1	metY	O-acetyl-L-homoserine sulfhydrylase	460	0	1	78	2	NA	NA		metY(460)	1272	1272	105577_PA010_00031	105578_PA017_00765	105579_PA026_00315	105580_PA028_01464	105581_PA029_00031	105583_PA031_00774	105584_PA032_00962	105585_PA033_00031	105586_PA034_00778	105587_PA040_01145	105590_PA048_00664	105593_PA061_00031	105594_PA062_00733	105597_PA065_00514	105601_PA070_00793	105614_PA093_01137	105616_PV004_01096	105636_PV086_01042	105640_PV091_01211	105642_PV093_01022	105746_cerdo_0_1_C1_01131	105747_cerdo_0_1_C2_01108	108479_3070_01081	108481_3072_00906	108483_3074_00834	108486_3077_00789	108491_3082_00841	108492_3083_00419	108494_3085_00100	108498_3089_00735	108504_3095_01041	108508_3099_00945	108524_3325_01061	108528_3330_00496	108546_3348_00661	112371_CAM000139_1663_01336
g01407_00005__g01407	groS	10 kDa chaperonin	460	0	1	79	1	NA	NA		groS(460)	261	261	105577_PA010_00989	105578_PA017_00226	105579_PA026_00856	105580_PA028_00745	105581_PA029_01141	105583_PA031_00310	105584_PA032_00780	105585_PA033_00523	105586_PA034_00997	105587_PA040_01241	105590_PA048_01105	105593_PA061_01232	105594_PA062_00689	105597_PA065_01243	105601_PA070_00244	105614_PA093_01184	105616_PV004_00700	105636_PV086_00417	105640_PV091_00608	105642_PV093_01104	105746_cerdo_0_1_C1_00028	105747_cerdo_0_1_C2_00427	108479_3070_00647	108481_3072_00389	108483_3074_00157	108486_3077_01485	108491_3082_01022	108492_3083_00266	108494_3085_01059	108498_3089_00870	108504_3095_01413	108508_3099_00147	108524_3325_00855	108528_3330_01312	108546_3348_01106	112371_CAM000139_1663_00027
g00626_00004__g00626	NA	hypothetical protein	460	0	1	79	2	NA	NA		NA(463)	273	2547	105577_PA010_00988	105578_PA017_00225	105579_PA026_00857	105580_PA028_00746	105581_PA029_01140	105583_PA031_00309	105584_PA032_00781	105585_PA033_00522	105586_PA034_00996	105587_PA040_01240	105590_PA048_01106	105593_PA061_01231	105594_PA062_00688	105597_PA065_01242	105601_PA070_00243	105614_PA093_01183	105616_PV004_00701	105636_PV086_00416	105640_PV091_00609	105642_PV093_01105	105746_cerdo_0_1_C1_00029	105747_cerdo_0_1_C2_00426	108479_3070_00646	108481_3072_00388	108483_3074_00156	108486_3077_01525	108491_3082_01021	108492_3083_00267	108494_3085_01462	108498_3089_00871	108504_3095_01105	108508_3099_00148	108524_3325_00856	108528_3330_01147	108546_3348_01104;108546_3348_01105	112371_CAM000139_1663_00028
g01037_1_00006__g01037_1	purC	Phosphoribosylaminoimidazole-succinocarboxamide synthase	460	0	1	80	1	NA	NA		purC(460)	300	711	105577_PA010_00206	105578_PA017_00323	105579_PA026_00700	105580_PA028_00570	105581_PA029_00306	105583_PA031_00066	105584_PA032_00086	105585_PA033_00622	105586_PA034_00183	105587_PA040_00089	105590_PA048_00566	105593_PA061_00824	105594_PA062_00080	105597_PA065_00830	105601_PA070_00697	105614_PA093_00084	105616_PV004_01041	105636_PV086_00509	105640_PV091_00264	105642_PV093_00565	105746_cerdo_0_1_C1_00536	105747_cerdo_0_1_C2_00647	108479_3070_00279	108481_3072_00045	108483_3074_00030	108486_3077_00185	108491_3082_00561	108492_3083_00194	108494_3085_00658	108498_3089_00031	108504_3095_01394	108508_3099_00066	108524_3325_00409	108528_3330_00360	108546_3348_00282	112371_CAM000139_1663_00624
g01750_00005__g01750	purS	Phosphoribosylformylglycinamidine synthase subunit PurS	460	0	1	80	2	NA	NA		purS(460)	246	246	105577_PA010_00207	105578_PA017_00322	105579_PA026_00701	105580_PA028_00571	105581_PA029_00307	105583_PA031_00067	105584_PA032_00085	105585_PA033_00623	105586_PA034_00182	105587_PA040_00088	105590_PA048_00567	105593_PA061_00825	105594_PA062_00081	105597_PA065_00831	105601_PA070_00698	105614_PA093_00083	105616_PV004_01042	105636_PV086_00510	105640_PV091_00263	105642_PV093_00566	105746_cerdo_0_1_C1_00537	105747_cerdo_0_1_C2_00646	108479_3070_00280	108481_3072_00044	108483_3074_00029	108486_3077_00184	108491_3082_00560	108492_3083_00193	108494_3085_00659	108498_3089_00030	108504_3095_01393	108508_3099_00065	108524_3325_00408	108528_3330_00361	108546_3348_00283	112371_CAM000139_1663_00623
g00296_1_00006__g00296_1	ptlI	hypothetical protein	460	0	1	81	1	NA	NA		NA(401):ptlI(62)	147	1371	105577_PA010_00553	105578_PA017_01156	105579_PA026_00619	105580_PA028_01137	105581_PA029_00803	105583_PA031_00545;105583_PA031_01927	105584_PA032_00606	105585_PA033_00846	105586_PA034_01197	105587_PA040_01468	105590_PA048_01183	105593_PA061_00276	105594_PA062_00319	105597_PA065_00443	105601_PA070_00394	105614_PA093_00926	105616_PV004_00771	105636_PV086_01156	105640_PV091_01173	105642_PV093_00419	105746_cerdo_0_1_C1_01322	105747_cerdo_0_1_C2_01299	108479_3070_00875	108481_3072_00768	108483_3074_00228	108486_3077_00396	108491_3082_00524	108492_3083_00300	108494_3085_00551	108498_3089_00196	108504_3095_00264	108508_3099_01148	108524_3325_00647	108528_3330_00220	108546_3348_00744	112371_CAM000139_1663_00839
g00724_00005__g00724	NA	hypothetical protein	460	0	1	81	2	NA	NA		NA(461)	420	450	105577_PA010_00554	105578_PA017_01157	105579_PA026_00620	105580_PA028_01138	105581_PA029_00804	105583_PA031_00544;105583_PA031_01928	105584_PA032_00605	105585_PA033_00845	105586_PA034_01196	105587_PA040_01469	105590_PA048_01184	105593_PA061_00277	105594_PA062_00320	105597_PA065_00444	105601_PA070_00395	105614_PA093_00927	105616_PV004_00772	105636_PV086_01157	105640_PV091_01172	105642_PV093_00420	105746_cerdo_0_1_C1_01321	105747_cerdo_0_1_C2_01298	108479_3070_00874	108481_3072_00767	108483_3074_00229	108486_3077_00395	108491_3082_00525	108492_3083_00301	108494_3085_00550	108498_3089_00197	108504_3095_00263	108508_3099_01147	108524_3325_00646	108528_3330_00221	108546_3348_00743	112371_CAM000139_1663_00840
g01581_00005__g01581	NA	hypothetical protein	460	0	1	82	1	NA	NA		NA(460)	207	807	105577_PA010_01006	105578_PA017_01646	105579_PA026_01529	105580_PA028_01184	105581_PA029_01495	105583_PA031_00849	105584_PA032_00819	105585_PA033_01428	105586_PA034_01352	105587_PA040_00921	105590_PA048_01520	105593_PA061_01519	105594_PA062_00858	105597_PA065_01580	105601_PA070_01526	105614_PA093_01250	105616_PV004_00874	105636_PV086_01707	105640_PV091_01333	105642_PV093_01193	105746_cerdo_0_1_C1_01705	105747_cerdo_0_1_C2_01682	108479_3070_01279	108481_3072_00721	108483_3074_01071	108486_3077_00811	108491_3082_00828	108492_3083_00751	108494_3085_00719	108498_3089_01388	108504_3095_01215	108508_3099_00420	108524_3325_00721	108528_3330_00658	108546_3348_00045	112371_CAM000139_1663_01601
g00019_00006__g00019	alaC	Glutamate-pyruvate aminotransferase AlaC	460	0	1	82	2	NA	NA		alaC(460)	438	1206	105577_PA010_01005	105578_PA017_01645	105579_PA026_01528	105580_PA028_01183	105581_PA029_01494	105583_PA031_00848	105584_PA032_00818	105585_PA033_01427	105586_PA034_01351	105587_PA040_00920	105590_PA048_01519	105593_PA061_01518	105594_PA062_00857	105597_PA065_01579	105601_PA070_01525	105614_PA093_01249	105616_PV004_00873	105636_PV086_01706	105640_PV091_01332	105642_PV093_01192	105746_cerdo_0_1_C1_01704	105747_cerdo_0_1_C2_01681	108479_3070_01280	108481_3072_00722	108483_3074_01070	108486_3077_00812	108491_3082_00827	108492_3083_00750	108494_3085_00720	108498_3089_01387	108504_3095_01216	108508_3099_00419	108524_3325_00722	108528_3330_00659	108546_3348_00044	112371_CAM000139_1663_01602
g02031_00004__g02031	frr	Ribosome-recycling factor	460	0	1	83	1	NA	NA		frr(460)	201	558	105577_PA010_01273	105578_PA017_01443	105579_PA026_01272	105580_PA028_01057	105581_PA029_00864	105583_PA031_01313	105584_PA032_01274	105585_PA033_00555	105586_PA034_01161	105587_PA040_01712	105590_PA048_01327	105593_PA061_01177	105594_PA062_01167	105597_PA065_01389	105601_PA070_01496	105614_PA093_00401	105616_PV004_00577	105636_PV086_01677	105640_PV091_01256	105642_PV093_01066	105746_cerdo_0_1_C1_01674	105747_cerdo_0_1_C2_01652	108479_3070_00796	108481_3072_00597	108483_3074_00506	108486_3077_00559	108491_3082_00157	108492_3083_00281	108494_3085_00458	108498_3089_00830	108504_3095_00171	108508_3099_00263	108524_3325_00344	108528_3330_00169	108546_3348_00076	112371_CAM000139_1663_01530
g01643_00004__g01643	pyrE	Orotate phosphoribosyltransferase	460	0	1	83	2	NA	NA		pyrE(460)	186	609	105577_PA010_01272	105578_PA017_01442	105579_PA026_01271	105580_PA028_01056	105581_PA029_00863	105583_PA031_01314	105584_PA032_01273	105585_PA033_00554	105586_PA034_01160	105587_PA040_01711	105590_PA048_01326	105593_PA061_01176	105594_PA062_01166	105597_PA065_01388	105601_PA070_01495	105614_PA093_00400	105616_PV004_00576	105636_PV086_01676	105640_PV091_01255	105642_PV093_01065	105746_cerdo_0_1_C1_01673	105747_cerdo_0_1_C2_01653	108479_3070_00795	108481_3072_00598	108483_3074_00507	108486_3077_00558	108491_3082_00156	108492_3083_00282	108494_3085_00457	108498_3089_00831	108504_3095_00170	108508_3099_00264	108524_3325_00343	108528_3330_00168	108546_3348_00077	112371_CAM000139_1663_01529
g00624_00004__g00624	gpmI	2%2C3-bisphosphoglycerate-independent phosphoglycerate mutase	460	0	1	84	1	NA	NA		gpmI(462)	321	1482	105577_PA010_01626	105578_PA017_00400	105579_PA026_01070	105580_PA028_00493	105581_PA029_00229	105583_PA031_00619;105583_PA031_01949	105584_PA032_01587	105585_PA033_01726	105586_PA034_01668	105587_PA040_00167	105590_PA048_01795	105593_PA061_01149	105594_PA062_00003	105597_PA065_00753	105601_PA070_01822	105614_PA093_01750	105616_PV004_01655	105636_PV086_00433	105640_PV091_00340	105642_PV093_00489;105642_PV093_01850	105746_cerdo_0_1_C1_00457	105747_cerdo_0_1_C2_00726	108479_3070_01465	108481_3072_00121	108483_3074_01446	108486_3077_01149	108491_3082_01009	108492_3083_01120	108494_3085_00434	108498_3089_00107	108504_3095_01270	108508_3099_00975	108524_3325_01037	108528_3330_01076	108546_3348_00379	112371_CAM000139_1663_00702
g01964_00005__g01964	fabG	3-oxoacyl-[acyl-carrier-protein] reductase FabG	460	0	1	84	2	NA	NA		fabG(460)	306	744	105577_PA010_01627	105578_PA017_00399	105579_PA026_01069	105580_PA028_00494	105581_PA029_00230	105583_PA031_00618	105584_PA032_01588	105585_PA033_01727	105586_PA034_01669	105587_PA040_00166	105590_PA048_01796	105593_PA061_01148	105594_PA062_00004	105597_PA065_00754	105601_PA070_01823	105614_PA093_01751	105616_PV004_01656	105636_PV086_00434	105640_PV091_00339	105642_PV093_00490	105746_cerdo_0_1_C1_00458	105747_cerdo_0_1_C2_00725	108479_3070_01464	108481_3072_00120	108483_3074_01445	108486_3077_01150	108491_3082_01008	108492_3083_01119	108494_3085_00435	108498_3089_00106	108504_3095_01269	108508_3099_00974	108524_3325_01036	108528_3330_01077	108546_3348_00380	112371_CAM000139_1663_00701
g00390_00004__g00390	leuB	3-isopropylmalate dehydrogenase	460	0	1	85	1	NA	NA		leuB(461)	369	1077	105577_PA010_00041	105578_PA017_00775	105579_PA026_00325	105580_PA028_01454	105581_PA029_00041	105583_PA031_00784	105584_PA032_00952	105585_PA033_00041	105586_PA034_00768	105587_PA040_01155	105590_PA048_00674	105593_PA061_00041	105594_PA062_00743	105597_PA065_00524	105601_PA070_00803	105614_PA093_01147	105616_PV004_01086	105636_PV086_01052	105640_PV091_01221	105642_PV093_01032	105746_cerdo_0_1_C1_01141	105747_cerdo_0_1_C2_01118	108479_3070_01516	108481_3072_00916	108483_3074_00824	108486_3077_01179	108491_3082_01212	108492_3083_01275	108494_3085_00110	108498_3089_01441	108504_3095_01101	108508_3099_00935	108524_3325_01251;108524_3325_01252	108528_3330_00486	108546_3348_00887	112371_CAM000139_1663_01326
g00292_2_00005__g00292_2	leuC	3-isopropylmalate dehydratase large subunit	460	0	1.02	85	2	NA	NA		leuC(462):NA(9)	366	1407	105577_PA010_00042	105578_PA017_00776	105579_PA026_00326	105580_PA028_01453	105581_PA029_00042	105583_PA031_00785	105584_PA032_00951	105585_PA033_00042	105586_PA034_00767	105587_PA040_01156	105590_PA048_00675	105593_PA061_00042	105594_PA062_00744	105597_PA065_00525	105601_PA070_00804	105614_PA093_01148	105616_PV004_01085	105636_PV086_01053	105640_PV091_01222	105642_PV093_01033;105642_PV093_01796	105746_cerdo_0_1_C1_01142	105747_cerdo_0_1_C2_01119	108479_3070_01515	108481_3072_00917	108483_3074_00823	108486_3077_01178	108491_3082_01211	108492_3083_01276	108494_3085_00111	108498_3089_01439;108498_3089_01440	108504_3095_01100	108508_3099_00934	108524_3325_01250	108528_3330_00485	108546_3348_00886	112371_CAM000139_1663_01325
g01509_00005__g01509	NA	hypothetical protein	460	0	1	86	1	NA	NA		NA(460)	519	1188	105577_PA010_00156	105578_PA017_00373	105579_PA026_01043	105580_PA028_00520	105581_PA029_00256	105583_PA031_00591	105584_PA032_00136	105585_PA033_00984	105586_PA034_00233	105587_PA040_00139	105590_PA048_00516	105593_PA061_01122	105594_PA062_00030	105597_PA065_00780	105601_PA070_00647	105614_PA093_00134	105616_PV004_00403	105636_PV086_00459	105640_PV091_00314	105642_PV093_00515	105746_cerdo_0_1_C1_00486	105747_cerdo_0_1_C2_00697	108479_3070_00597	108481_3072_00095	108483_3074_00080	108486_3077_00096	108491_3082_01420	108492_3083_00210	108494_3085_01154	108498_3089_00081	108504_3095_00362	108508_3099_00351	108524_3325_00954	108528_3330_00021	108546_3348_00107	112371_CAM000139_1663_00674
g00065_00006__g00065	nusA	Transcription termination/antitermination protein NusA	460	0	1	86	2	NA	NA		nusA(460)	663	1089	105577_PA010_00155	105578_PA017_00374	105579_PA026_01044	105580_PA028_00519	105581_PA029_00255	105583_PA031_00592	105584_PA032_00137	105585_PA033_00985	105586_PA034_00234	105587_PA040_00140	105590_PA048_00515	105593_PA061_01123	105594_PA062_00029	105597_PA065_00779	105601_PA070_00646	105614_PA093_00135	105616_PV004_00404	105636_PV086_00458	105640_PV091_00315	105642_PV093_00514	105746_cerdo_0_1_C1_00485	105747_cerdo_0_1_C2_00698	108479_3070_00598	108481_3072_00096	108483_3074_00081	108486_3077_00097	108491_3082_01419	108492_3083_00211	108494_3085_01155	108498_3089_00082	108504_3095_00363	108508_3099_00352	108524_3325_00955	108528_3330_00020	108546_3348_00108	112371_CAM000139_1663_00675
g01199_00004__g01199	NA	hypothetical protein	460	0	1	87	1	NA	NA		NA(461)	216	2490	105577_PA010_00587	105578_PA017_01190	105579_PA026_00654	105580_PA028_01172	105581_PA029_00838	105583_PA031_00508	105584_PA032_00572	105585_PA033_00809	105586_PA034_01102	105587_PA040_01345	105590_PA048_01218	105593_PA061_00311	105594_PA062_00354	105597_PA065_00478	105601_PA070_00429	105614_PA093_00960	105616_PV004_01614	105636_PV086_01191	105640_PV091_01139	105642_PV093_00453	105746_cerdo_0_1_C1_01286	105747_cerdo_0_1_C2_01263	108479_3070_01200	108481_3072_00733	108483_3074_00263	108486_3077_00818	108491_3082_00850	108492_3083_00071	108494_3085_00395	108498_3089_00230	108504_3095_01265	108508_3099_00407	108524_3325_00165	108528_3330_00342	108546_3348_00260	112371_CAM000139_1663_00873
g01058_00004__g01058	NA	dITP/XTP pyrophosphatase	460	0	1	87	2	NA	NA		NA(479)	210	609	105577_PA010_00586	105578_PA017_01189	105579_PA026_00653	105580_PA028_01171	105581_PA029_00837	105583_PA031_00509	105584_PA032_00573	105585_PA033_00810	105586_PA034_01101	105587_PA040_01346	105590_PA048_01217	105593_PA061_00310	105594_PA062_00353	105597_PA065_00477	105601_PA070_00428	105614_PA093_00959	105616_PV004_01613	105636_PV086_01190	105640_PV091_01140	105642_PV093_00452	105746_cerdo_0_1_C1_01287	105747_cerdo_0_1_C2_01264	108479_3070_01199	108481_3072_00734	108483_3074_00262	108486_3077_00819	108491_3082_00851	108492_3083_00072	108494_3085_00394	108498_3089_00229	108504_3095_01266	108508_3099_00406	108524_3325_00166	108528_3330_00343	108546_3348_00259	112371_CAM000139_1663_00872
g00698_00005__g00698	NA	hypothetical protein	460	0	1	88	1	NA	NA		NA(461)	234	630	105577_PA010_00039	105578_PA017_00773	105579_PA026_00323	105580_PA028_01456	105581_PA029_00039	105583_PA031_00782	105584_PA032_00954	105585_PA033_00039	105586_PA034_00770	105587_PA040_01153	105590_PA048_00672	105593_PA061_00039	105594_PA062_00741	105597_PA065_00522	105601_PA070_00801	105614_PA093_01145	105616_PV004_01088	105636_PV086_01050	105640_PV091_01219	105642_PV093_01030	105746_cerdo_0_1_C1_01139	105747_cerdo_0_1_C2_01116	108479_3070_01089	108481_3072_00914	108483_3074_00826	108486_3077_01181	108491_3082_01502	108492_3083_00411	108494_3085_00108	108498_3089_01443	108504_3095_01103	108508_3099_00937	108524_3325_01501	108528_3330_00488	108546_3348_00889	112371_CAM000139_1663_01328
g00355_00003__g00355	NA	hypothetical protein	460	0	1	88	2	NA	NA		NA(467)	306	645	105577_PA010_00038	105578_PA017_00772	105579_PA026_00322	105580_PA028_01457	105581_PA029_00038	105583_PA031_00781	105584_PA032_00955	105585_PA033_00038	105586_PA034_00771	105587_PA040_01152	105590_PA048_00671	105593_PA061_00038	105594_PA062_00740	105597_PA065_00521	105601_PA070_00800	105614_PA093_01144	105616_PV004_01089	105636_PV086_01049	105640_PV091_01218	105642_PV093_01029	105746_cerdo_0_1_C1_01138	105747_cerdo_0_1_C2_01115	108479_3070_01088	108481_3072_00913	108483_3074_00827	108486_3077_01182	108491_3082_01501	108492_3083_00412	108494_3085_00107	108498_3089_01444	108504_3095_01104	108508_3099_00938	108524_3325_01500	108528_3330_00489	108546_3348_00890	112371_CAM000139_1663_01329
g01851_00005__g01851	argG	Argininosuccinate synthase	460	0	1	89	1	NA	NA		argG(460)	921	1221	105577_PA010_00797	105578_PA017_01280	105579_PA026_00566	105580_PA028_00385	105581_PA029_00379	105583_PA031_00199	105584_PA032_00215	105585_PA033_00414	105586_PA034_00059	105587_PA040_00432	105590_PA048_00390	105593_PA061_00405	105594_PA062_00182	105597_PA065_00236	105601_PA070_01222	105614_PA093_00556	105616_PV004_00059	105636_PV086_00647	105640_PV091_01083	105642_PV093_00638	105746_cerdo_0_1_C1_00662	105747_cerdo_0_1_C2_00521	108479_3070_00059	108481_3072_00416	108483_3074_00402	108486_3077_00569	108491_3082_00757	108492_3083_00342	108494_3085_00804	108498_3089_01212	108504_3095_00115	108508_3099_00200	108524_3325_00131	108528_3330_00377	108546_3348_00352	112371_CAM000139_1663_00500
g01737_00005__g01737	NA	putative protein	460	0	1	89	2	NA	NA		NA(460)	246	288	105577_PA010_00796	105578_PA017_01279	105579_PA026_00565	105580_PA028_00384	105581_PA029_00378	105583_PA031_00198	105584_PA032_00214	105585_PA033_00413	105586_PA034_00058	105587_PA040_00431	105590_PA048_00389	105593_PA061_00404	105594_PA062_00181	105597_PA065_00235	105601_PA070_01221	105614_PA093_00555	105616_PV004_00058	105636_PV086_00646	105640_PV091_01082	105642_PV093_00637	105746_cerdo_0_1_C1_00663	105747_cerdo_0_1_C2_00520	108479_3070_00058	108481_3072_00417	108483_3074_00401	108486_3077_00570	108491_3082_00758	108492_3083_00343	108494_3085_00803	108498_3089_01211	108504_3095_00114	108508_3099_00201	108524_3325_00130	108528_3330_00378	108546_3348_00351	112371_CAM000139_1663_00499
g01652_00004__g01652	fapR	hypothetical protein	460	0	1	90	1	NA	NA		NA(376):fapR(84)	576	576	105577_PA010_01575	105578_PA017_01670	105579_PA026_01728	105580_PA028_00164	105581_PA029_01723	105583_PA031_00790	105584_PA032_01622	105585_PA033_01555	105586_PA034_01681	105587_PA040_01821	105590_PA048_00164	105593_PA061_01459	105594_PA062_01726	105597_PA065_01476	105601_PA070_00004	105614_PA093_01457	105616_PV004_01694	105636_PV086_00173	105640_PV091_00873	105642_PV093_01394	105746_cerdo_0_1_C1_00279	105747_cerdo_0_1_C2_00176	108479_3070_01157	108481_3072_01253	108483_3074_01529	108486_3077_01553	108491_3082_01474	108492_3083_01195	108494_3085_00769	108498_3089_01396	108504_3095_01205	108508_3099_01381	108524_3325_01472	108528_3330_01081	108546_3348_01331	112371_CAM000139_1663_00273
g02205_00004__g02205	NA	hypothetical protein	460	0	1	90	2	NA	NA		NA(460)	174	174	105577_PA010_01576	105578_PA017_01671	105579_PA026_01729	105580_PA028_00163	105581_PA029_01724	105583_PA031_00791	105584_PA032_01623	105585_PA033_01556	105586_PA034_01682	105587_PA040_01822	105590_PA048_00163	105593_PA061_01460	105594_PA062_01727	105597_PA065_01477	105601_PA070_00005	105614_PA093_01458	105616_PV004_01695	105636_PV086_00174	105640_PV091_00874	105642_PV093_01395	105746_cerdo_0_1_C1_00278	105747_cerdo_0_1_C2_00177	108479_3070_01158	108481_3072_01254	108483_3074_01528	108486_3077_01554	108491_3082_01475	108492_3083_01196	108494_3085_00768	108498_3089_01397	108504_3095_01206	108508_3099_01380	108524_3325_01473	108528_3330_01082	108546_3348_01332	112371_CAM000139_1663_00272
g00040_00006__g00040	acpP	Acyl carrier protein	460	0	1	91	1	NA	NA		acpP(460)	207	234	105577_PA010_01630	105578_PA017_00396	105579_PA026_01066	105580_PA028_00497	105581_PA029_00233	105583_PA031_00615	105584_PA032_01591	105585_PA033_01730	105586_PA034_01672	105587_PA040_00163	105590_PA048_01799	105593_PA061_01145	105594_PA062_00007	105597_PA065_00757	105601_PA070_01826	105614_PA093_01754	105616_PV004_01659	105636_PV086_00437	105640_PV091_00336	105642_PV093_00493	105746_cerdo_0_1_C1_00461	105747_cerdo_0_1_C2_00722	108479_3070_01461	108481_3072_00117	108483_3074_01442	108486_3077_01153	108491_3082_01005	108492_3083_01116	108494_3085_00438	108498_3089_00103	108504_3095_00537	108508_3099_00971	108524_3325_01033	108528_3330_01412	108546_3348_00383	112371_CAM000139_1663_00698
g01504_00005__g01504	fabF	3-oxoacyl-[acyl-carrier-protein] synthase 2	460	0	1	91	2	NA	NA		fabF(461)	531	1215	105577_PA010_01631	105578_PA017_00395	105579_PA026_01065	105580_PA028_00498	105581_PA029_00234	105583_PA031_00614	105584_PA032_01592	105585_PA033_01731	105586_PA034_01673	105587_PA040_00162	105590_PA048_01800	105593_PA061_01144	105594_PA062_00008	105597_PA065_00758	105601_PA070_01827	105614_PA093_01755	105616_PV004_01660	105636_PV086_00438	105640_PV091_00335	105642_PV093_00494	105746_cerdo_0_1_C1_00462	105747_cerdo_0_1_C2_00721	108479_3070_01460	108481_3072_00116	108483_3074_01441	108486_3077_01154	108491_3082_01004	108492_3083_01115	108494_3085_00439	108498_3089_00102	108504_3095_00536	108508_3099_00970	108524_3325_01031;108524_3325_01032	108528_3330_01411	108546_3348_00384	112371_CAM000139_1663_00697
g00614_1_00009__g00614_1	aspS	Aspartate--tRNA(Asp/Asn) ligase	460	0	1	92	1	NA	NA		aspS(460)	399	1785	105577_PA010_00817	105578_PA017_01300	105579_PA026_00586	105580_PA028_00405	105581_PA029_00399	105583_PA031_00219	105584_PA032_00235	105585_PA033_00434	105586_PA034_00079	105587_PA040_00452	105590_PA048_00410	105593_PA061_00425	105594_PA062_00202	105597_PA065_00256	105601_PA070_01242	105614_PA093_00576	105616_PV004_00079	105636_PV086_00667	105640_PV091_01103	105642_PV093_00658	105746_cerdo_0_1_C1_00642	105747_cerdo_0_1_C2_00541	108479_3070_00079	108481_3072_01083	108483_3074_00422	108486_3077_00998	108491_3082_00986	108492_3083_01439	108494_3085_01122	108498_3089_00988	108504_3095_00135	108508_3099_00180	108524_3325_01430	108528_3330_00587	108546_3348_00529	112371_CAM000139_1663_00520
g02025_00005__g02025	adk	Adenylate kinase	460	0	1	92	2	NA	NA		adk(460)	294	576	105577_PA010_00818	105578_PA017_01301	105579_PA026_00587	105580_PA028_00406	105581_PA029_00400	105583_PA031_00220	105584_PA032_00236	105585_PA033_00435	105586_PA034_00080	105587_PA040_00453	105590_PA048_00411	105593_PA061_00426	105594_PA062_00203	105597_PA065_00257	105601_PA070_01243	105614_PA093_00577	105616_PV004_00080	105636_PV086_00668	105640_PV091_01104	105642_PV093_00659	105746_cerdo_0_1_C1_00641	105747_cerdo_0_1_C2_00542	108479_3070_00080	108481_3072_01082	108483_3074_00423	108486_3077_00999	108491_3082_00987	108492_3083_01438	108494_3085_01121	108498_3089_00989	108504_3095_00136	108508_3099_00179	108524_3325_01429	108528_3330_00586	108546_3348_00528	112371_CAM000139_1663_00521
g00037_00006__g00037	pyrH	Uridylate kinase	460	0	1	93	1	NA	NA		pyrH(460)	717	717	105577_PA010_01462	105578_PA017_00271	105579_PA026_01151	105580_PA028_00458	105581_PA029_00715	105583_PA031_01019	105584_PA032_00035	105585_PA033_00888	105586_PA034_00132	105587_PA040_00033	105590_PA048_00463	105593_PA061_01025	105594_PA062_01123	105597_PA065_00309	105601_PA070_01438	105614_PA093_00032	105616_PV004_00131	105636_PV086_00720	105640_PV091_00212	105642_PV093_00888	105746_cerdo_0_1_C1_00589	105747_cerdo_0_1_C2_00594	108479_3070_00331	108481_3072_00539	108483_3074_00192	108486_3077_00414	108491_3082_00032	108492_3083_00022	108494_3085_00313	108498_3089_00788	108504_3095_00047	108508_3099_00014	108524_3325_00111	108528_3330_00800	108546_3348_00608	112371_CAM000139_1663_00572
g02174_00004__g02174	rpoZ	DNA-directed RNA polymerase subunit omega	460	0	1	93	2	NA	NA		rpoZ(460)	222	225	105577_PA010_01461	105578_PA017_00270	105579_PA026_01150	105580_PA028_00457	105581_PA029_00714	105583_PA031_01018	105584_PA032_00034	105585_PA033_00887	105586_PA034_00131	105587_PA040_00032	105590_PA048_00462	105593_PA061_01024	105594_PA062_01122	105597_PA065_00308	105601_PA070_01437	105614_PA093_00031	105616_PV004_00130	105636_PV086_00719	105640_PV091_00211	105642_PV093_00887	105746_cerdo_0_1_C1_00590	105747_cerdo_0_1_C2_00593	108479_3070_00332	108481_3072_00540	108483_3074_00193	108486_3077_00415	108491_3082_00031	108492_3083_00023	108494_3085_00314	108498_3089_00789	108504_3095_00048	108508_3099_00013	108524_3325_00112	108528_3330_00801	108546_3348_00607	112371_CAM000139_1663_00571
g01313_00004__g01313	flgH	Flagellar L-ring protein	460	0	1	94	1	NA	NA		flgH(461)	624	699	105577_PA010_00785	105578_PA017_01268	105579_PA026_00554	105580_PA028_00373	105581_PA029_00367	105583_PA031_00184;105583_PA031_01919	105584_PA032_00203	105585_PA033_00399	105586_PA034_00047	105587_PA040_00402	105590_PA048_00378	105593_PA061_00393	105594_PA062_00170	105597_PA065_00224	105601_PA070_01210	105614_PA093_00544	105616_PV004_00047	105636_PV086_00635	105640_PV091_01071	105642_PV093_00626	105746_cerdo_0_1_C1_00682	105747_cerdo_0_1_C2_00501	108479_3070_00047	108481_3072_00428	108483_3074_01147	108486_3077_00581	108491_3082_01161	108492_3083_01270	108494_3085_00456	108498_3089_01200	108504_3095_01056	108508_3099_00212	108524_3325_00119	108528_3330_01177	108546_3348_00507	112371_CAM000139_1663_00488
g01238_00005__g01238	ispG	4-hydroxy-3-methylbut-2-en-1-yl diphosphate synthase (flavodoxin)	460	0	1	94	2	NA	NA		ispG(462)	315	1074	105577_PA010_00786	105578_PA017_01269	105579_PA026_00555	105580_PA028_00374	105581_PA029_00368	105583_PA031_00185;105583_PA031_01918	105584_PA032_00204	105585_PA033_00400	105586_PA034_00048	105587_PA040_00403	105590_PA048_00379	105593_PA061_00394	105594_PA062_00171	105597_PA065_00225	105601_PA070_01211	105614_PA093_00545	105616_PV004_00048	105636_PV086_00636	105640_PV091_01072	105642_PV093_00627	105746_cerdo_0_1_C1_00681	105747_cerdo_0_1_C2_00502	108479_3070_00048	108481_3072_00427	108483_3074_01148	108486_3077_00580	108491_3082_01160	108492_3083_01271	108494_3085_00455	108498_3089_01201	108504_3095_01055	108508_3099_00211	108524_3325_00120	108528_3330_01176	108546_3348_00506	112371_CAM000139_1663_00489
g00797_00003__g00797	NA	hypothetical protein	460	0	1	95	1	NA	NA		NA(461)	213	1101	105577_PA010_00438	105578_PA017_00677	105579_PA026_00967	105580_PA028_00683	105581_PA029_01030	105583_PA031_00686	105584_PA032_01116	105585_PA033_01311	105586_PA034_00335	105587_PA040_00860	105590_PA048_01238	105593_PA061_00937	105594_PA062_01027	105597_PA065_00714	105601_PA070_00999	105614_PA093_00251	105616_PV004_00321	105636_PV086_00826	105640_PV091_00447	105642_PV093_00954	105746_cerdo_0_1_C1_00808	105747_cerdo_0_1_C2_01019	108479_3070_00264	108481_3072_01368	108483_3074_00620	108486_3077_01005	108491_3082_00455	108492_3083_00574	108494_3085_00324	108498_3089_00586	108504_3095_00191	108508_3099_00112	108524_3325_00572	108528_3330_00527	108546_3348_00464	112371_CAM000139_1663_01135
g01277_00002__g01277	NA	Farnesyl diphosphate synthase	460	0	1	95	2	NA	NA		NA(461)	648	846	105577_PA010_00439	105578_PA017_00678	105579_PA026_00968	105580_PA028_00684	105581_PA029_01029	105583_PA031_00687	105584_PA032_01115	105585_PA033_01312	105586_PA034_00336	105587_PA040_00861	105590_PA048_01239	105593_PA061_00938	105594_PA062_01026	105597_PA065_00715	105601_PA070_01000	105614_PA093_00252	105616_PV004_00322	105636_PV086_00827	105640_PV091_00448	105642_PV093_00955	105746_cerdo_0_1_C1_00807	105747_cerdo_0_1_C2_01020	108479_3070_00265	108481_3072_01367	108483_3074_00621	108486_3077_01006	108491_3082_00456	108492_3083_00573	108494_3085_00323	108498_3089_00587	108504_3095_00190	108508_3099_00111	108524_3325_00573	108528_3330_00526	108546_3348_00463	112371_CAM000139_1663_01134
g00943_00005__g00943	ppk	Polyphosphate kinase	460	0	1	96	1	NA	NA		ppk(460):NA(1)	198	2085	105577_PA010_00601	105578_PA017_01203	105579_PA026_00667	105580_PA028_01554	105581_PA029_01551	105583_PA031_01379	105584_PA032_00559	105585_PA033_01393	105586_PA034_01115	105587_PA040_01332	105590_PA048_01231	105593_PA061_00324	105594_PA062_00367	105597_PA065_01513	105601_PA070_00442	105614_PA093_00973	105616_PV004_01392	105636_PV086_01205	105640_PV091_01126	105642_PV093_00466	105746_cerdo_0_1_C1_01272	105747_cerdo_0_1_C2_01249	108479_3070_01508	108481_3072_01137	108483_3074_01521	108486_3077_01354	108491_3082_01095	108492_3083_00057	108494_3085_00570	108498_3089_00243	108504_3095_00860	108508_3099_01014	108524_3325_00152	108528_3330_00792	108546_3348_01477	112371_CAM000139_1663_00886
g02058_00004__g02058	nrfH	Cytochrome c-type protein NrfH	460	0	1	96	2	NA	NA		nrfH(460)	351	492	105577_PA010_00602	105578_PA017_01204	105579_PA026_00668	105580_PA028_01555	105581_PA029_01552	105583_PA031_01378	105584_PA032_00558	105585_PA033_01392	105586_PA034_01116	105587_PA040_01331	105590_PA048_01232	105593_PA061_00325	105594_PA062_00368	105597_PA065_01514	105601_PA070_00443	105614_PA093_00974	105616_PV004_01393	105636_PV086_01206	105640_PV091_01125	105642_PV093_00467	105746_cerdo_0_1_C1_01271	105747_cerdo_0_1_C2_01248	108479_3070_01509	108481_3072_01138	108483_3074_01520	108486_3077_01540	108491_3082_01094	108492_3083_00056	108494_3085_00569	108498_3089_00244	108504_3095_00861	108508_3099_01015	108524_3325_00151	108528_3330_00793	108546_3348_01468	112371_CAM000139_1663_00887
g01790_00005__g01790	fliF	Flagellar M-ring protein	460	0	1	97	1	NA	NA		fliF(459):NA(1)	273	1683	105577_PA010_00903	105578_PA017_00515	105579_PA026_00222	105580_PA028_00274	105581_PA029_00551	105583_PA031_00360	105584_PA032_00552	105585_PA033_00306	105586_PA034_01509	105587_PA040_00282	105590_PA048_00266	105593_PA061_00510	105594_PA062_00586	105597_PA065_00112	105601_PA070_00561	105614_PA093_00493	105616_PV004_01352	105636_PV086_01428	105640_PV091_00066	105642_PV093_00068	105746_cerdo_0_1_C1_00985	105747_cerdo_0_1_C2_00842	108479_3070_00152	108481_3072_00179	108483_3074_01107	108486_3077_00525	108491_3082_00409	108492_3083_01134	108494_3085_00263	108498_3089_00561	108504_3095_00720	108508_3099_01019	108524_3325_00458	108528_3330_00055	108546_3348_00195	112371_CAM000139_1663_00975
g00017_00006__g00017	fliG	Flagellar motor switch protein FliG	460	0	1	97	2	NA	NA		fliG(460)	1029	1029	105577_PA010_00904	105578_PA017_00514	105579_PA026_00223	105580_PA028_00273	105581_PA029_00552	105583_PA031_00359	105584_PA032_00553	105585_PA033_00307	105586_PA034_01508	105587_PA040_00281	105590_PA048_00265	105593_PA061_00511	105594_PA062_00587	105597_PA065_00111	105601_PA070_00560	105614_PA093_00494	105616_PV004_01351	105636_PV086_01427	105640_PV091_00067	105642_PV093_00069	105746_cerdo_0_1_C1_00986	105747_cerdo_0_1_C2_00841	108479_3070_00153	108481_3072_00180	108483_3074_01106	108486_3077_00524	108491_3082_00410	108492_3083_01133	108494_3085_00262	108498_3089_00562	108504_3095_00721	108508_3099_01018	108524_3325_00459	108528_3330_00054	108546_3348_00196	112371_CAM000139_1663_00976
g00811_00004__g00811	aguA	Agmatine deiminase	460	0	1	98	1	NA	NA		aguA(460)	288	978	105577_PA010_01307	105578_PA017_01490	105579_PA026_01385	105580_PA028_01510	105581_PA029_01219	105583_PA031_01457	105584_PA032_01376	105585_PA033_01268	105586_PA034_01302	105587_PA040_00673	105590_PA048_01427	105593_PA061_00150	105594_PA062_01317	105597_PA065_01194	105601_PA070_01052	105614_PA093_01440	105616_PV004_01332	105636_PV086_00023	105640_PV091_01396	105642_PV093_01418	105746_cerdo_0_1_C1_00428	105747_cerdo_0_1_C2_00027	108479_3070_00918	108481_3072_01046	108483_3074_01313	108486_3077_01293	108491_3082_00417	108492_3083_00587	108494_3085_01084	108498_3089_01053	108504_3095_00398	108508_3099_00912	108524_3325_00429	108528_3330_00605	108546_3348_00446	112371_CAM000139_1663_00415
g01266_1_00004__g01266_1	fieF	Ferrous-iron efflux pump FieF	460	0	1	98	2	NA	NA		fieF(462)	285	888	105577_PA010_01306	105578_PA017_01489	105579_PA026_01386	105580_PA028_01511	105581_PA029_01220	105583_PA031_01458	105584_PA032_01375	105585_PA033_01269	105586_PA034_01303	105587_PA040_00672	105590_PA048_01426	105593_PA061_00151	105594_PA062_01318	105597_PA065_01193	105601_PA070_01053	105614_PA093_01441	105616_PV004_01331	105636_PV086_00024	105640_PV091_01395	105642_PV093_01417	105746_cerdo_0_1_C1_00427	105747_cerdo_0_1_C2_00028	108479_3070_00917	108481_3072_01045	108483_3074_01314	108486_3077_01294	108491_3082_00416	108492_3083_00588	108494_3085_01085;108494_3085_01086	108498_3089_01052	108504_3095_00399	108508_3099_00913	108524_3325_00430	108528_3330_00604	108546_3348_01553	112371_CAM000139_1663_00414
g00233_00002__g00233	NA	hypothetical protein	460	0	1	99	1	NA	NA		NA(460)	348	2088	105577_PA010_01675	105578_PA017_01702	105579_PA026_01562	105580_PA028_01595	105581_PA029_01359	105583_PA031_01409	105584_PA032_01363	105585_PA033_01576	105586_PA034_01562	105587_PA040_01596	105590_PA048_01606	105593_PA061_01622	105594_PA062_01586	105597_PA065_01736	105601_PA070_01654	105614_PA093_01568	105616_PV004_01536	105636_PV086_01808	105640_PV091_01565	105642_PV093_01561	105746_cerdo_0_1_C1_00742	105747_cerdo_0_1_C2_01742	108479_3070_01255	108481_3072_01516	108483_3074_01276	108486_3077_00965	108491_3082_00648	108492_3083_00698	108494_3085_00361	108498_3089_01522	108504_3095_00779	108508_3099_01364	108524_3325_01127	108528_3330_01366	108546_3348_00539	112371_CAM000139_1663_01663
g00271_1_00004__g00271_1	NA	hypothetical protein	460	0	1	99	2	NA	NA		NA(462)	255	891	105577_PA010_01676	105578_PA017_01701	105579_PA026_01561	105580_PA028_01594	105581_PA029_01358	105583_PA031_01408	105584_PA032_01364	105585_PA033_01577	105586_PA034_01563	105587_PA040_01595	105590_PA048_01607	105593_PA061_01621	105594_PA062_01585	105597_PA065_01735	105601_PA070_01653	105614_PA093_01567	105616_PV004_01535	105636_PV086_01809	105640_PV091_01564	105642_PV093_01562	105746_cerdo_0_1_C1_00743	105747_cerdo_0_1_C2_01743	108479_3070_01254	108481_3072_01517	108483_3074_01275	108486_3077_00966	108491_3082_00647	108492_3083_00699	108494_3085_00360	108498_3089_01523	108504_3095_00778	108508_3099_01365	108524_3325_01126	108528_3330_01365	108546_3348_00538	112371_CAM000139_1663_01664
g00013_00006__g00013	fur	Ferric uptake regulation protein	460	0	1	100	1	NA	NA		fur(460)	471	471	105577_PA010_00280	105578_PA017_00432	105579_PA026_01100	105580_PA028_00191	105581_PA029_01234	105583_PA031_01222	105584_PA032_00919	105585_PA033_00765	105586_PA034_00578	105587_PA040_00199	105590_PA048_00183	105593_PA061_00739	105594_PA062_01279	105597_PA065_00029	105601_PA070_00478	105614_PA093_00308	105616_PV004_01010	105636_PV086_01607	105640_PV091_00149	105642_PV093_00151	105746_cerdo_0_1_C1_01068	105747_cerdo_0_1_C2_00759	108479_3070_00677	108481_3072_00787	108483_3074_00382	108486_3077_00750	108491_3082_00174	108492_3083_00092	108494_3085_01069	108498_3089_00673	108504_3095_00269	108508_3099_01259	108524_3325_00689	108528_3330_00392	108546_3348_00964	112371_CAM000139_1663_01058
g00614_2_00010__g00614_2	lysS	Lysine--tRNA ligase	460	0	1	100	2	NA	NA		lysS(359):lysU(101)	291	1509	105577_PA010_00279	105578_PA017_00431	105579_PA026_01099	105580_PA028_00190	105581_PA029_01235	105583_PA031_01221	105584_PA032_00920	105585_PA033_00764	105586_PA034_00577	105587_PA040_00198	105590_PA048_00182	105593_PA061_00738	105594_PA062_01278	105597_PA065_00028	105601_PA070_00477	105614_PA093_00307	105616_PV004_01009	105636_PV086_01606	105640_PV091_00150	105642_PV093_00152	105746_cerdo_0_1_C1_01069	105747_cerdo_0_1_C2_00758	108479_3070_00676	108481_3072_00786	108483_3074_00383	108486_3077_00749	108491_3082_00173	108492_3083_00091	108494_3085_01070	108498_3089_00672	108504_3095_00270	108508_3099_01260	108524_3325_00688	108528_3330_00393	108546_3348_00965	112371_CAM000139_1663_01059
g00653_00003__g00653	mlaE	hypothetical protein	460	0	1	101	1	NA	NA		NA(470):mlaE(21)	222	1122	105577_PA010_00441	105578_PA017_00680	105579_PA026_00970	105580_PA028_00686	105581_PA029_01027	105583_PA031_00689;105583_PA031_00690	105584_PA032_01113	105585_PA033_01314;105585_PA033_01315	105586_PA034_00338	105587_PA040_00863;105587_PA040_00864	105590_PA048_01241	105593_PA061_00940	105594_PA062_01024	105597_PA065_00717	105601_PA070_01002	105614_PA093_00254	105616_PV004_00324	105636_PV086_00829	105640_PV091_00450	105642_PV093_00957	105746_cerdo_0_1_C1_00805	105747_cerdo_0_1_C2_01022	108479_3070_00267	108481_3072_01365	108483_3074_00623	108486_3077_01008	108491_3082_00458	108492_3083_00571	108494_3085_00321	108498_3089_00589	108504_3095_00188	108508_3099_00109	108524_3325_00575	108528_3330_00524	108546_3348_00461	112371_CAM000139_1663_01132
g00568_1_00007__g00568_1	mkl	putative ribonucleotide transport ATP-binding protein mkl	460	0	1	101	2	NA	NA		mkl(457):ecfA2(2):metN(1)	363	723	105577_PA010_00442	105578_PA017_00681	105579_PA026_00971	105580_PA028_00687	105581_PA029_01026	105583_PA031_00691	105584_PA032_01112	105585_PA033_01316	105586_PA034_00339	105587_PA040_00865	105590_PA048_01242	105593_PA061_00941	105594_PA062_01023	105597_PA065_00718	105601_PA070_01003	105614_PA093_00255	105616_PV004_00325	105636_PV086_00830	105640_PV091_00451	105642_PV093_00958	105746_cerdo_0_1_C1_00804	105747_cerdo_0_1_C2_01023	108479_3070_00268	108481_3072_01364	108483_3074_00624	108486_3077_01009	108491_3082_00459	108492_3083_00570	108494_3085_00320	108498_3089_00590	108504_3095_00187	108508_3099_00108	108524_3325_00576	108528_3330_00523	108546_3348_00460	112371_CAM000139_1663_01131
g01033_00004__g01033	dapB	4-hydroxy-tetrahydrodipicolinate reductase	460	0	1.01	102	1	NA	NA		dapB(463)	150	729	105577_PA010_01738	105578_PA017_01421	105579_PA026_01721	105580_PA028_01034	105581_PA029_01785	105583_PA031_01799;105583_PA031_01968	105584_PA032_01731	105585_PA033_01712	105586_PA034_01138	105587_PA040_01811	105590_PA048_01304	105593_PA061_01154	105594_PA062_01806	105597_PA065_01799	105601_PA070_01473	105614_PA093_01664	105616_PV004_01768	105636_PV086_01654	105640_PV091_01232	105642_PV093_01042;105642_PV093_01820	105746_cerdo_0_1_C1_01653	105747_cerdo_0_1_C2_01673	108479_3070_01294	108481_3072_00620	108483_3074_00529	108486_3077_01308	108491_3082_01321	108492_3083_01413	108494_3085_01125	108498_3089_00853	108504_3095_01332	108508_3099_01207	108524_3325_01397	108528_3330_01270	108546_3348_01226	112371_CAM000139_1663_01507
g01175_00005__g01175	purF	Amidophosphoribosyltransferase	460	0	1	102	2	NA	NA		purF(460)	570	1338	105577_PA010_01739	105578_PA017_01420	105579_PA026_01722	105580_PA028_01033	105581_PA029_01786	105583_PA031_01800	105584_PA032_01732	105585_PA033_01713	105586_PA034_01137	105587_PA040_01812	105590_PA048_01303	105593_PA061_01153	105594_PA062_01807	105597_PA065_01800	105601_PA070_01472	105614_PA093_01663	105616_PV004_01769	105636_PV086_01653	105640_PV091_01231	105642_PV093_01041	105746_cerdo_0_1_C1_01652	105747_cerdo_0_1_C2_01674	108479_3070_01293	108481_3072_00621	108483_3074_00530	108486_3077_01307	108491_3082_01322	108492_3083_01414	108494_3085_01124	108498_3089_00854	108504_3095_01331	108508_3099_01208	108524_3325_01398	108528_3330_01269	108546_3348_01227	112371_CAM000139_1663_01506
g00569_00005__g00569	queE	7-carboxy-7-deazaguanine synthase	460	0	1	103	1	NA	NA		queE(455):NA(5)	132	744	105577_PA010_01015	105578_PA017_01655	105579_PA026_01538	105580_PA028_01193	105581_PA029_01504	105583_PA031_00858	105584_PA032_00828	105585_PA033_01437	105586_PA034_01361	105587_PA040_00930	105590_PA048_01529	105593_PA061_01528	105594_PA062_00867	105597_PA065_01589	105601_PA070_01535	105614_PA093_01259	105616_PV004_00883	105636_PV086_01716	105640_PV091_01342	105642_PV093_01202	105746_cerdo_0_1_C1_01714	105747_cerdo_0_1_C2_01691	108479_3070_01269	108481_3072_00712	108483_3074_01080	108486_3077_00802	108491_3082_01189	108492_3083_00760	108494_3085_00783	108498_3089_00972	108504_3095_00915	108508_3099_00429	108524_3325_00712	108528_3330_00993	108546_3348_00054	112371_CAM000139_1663_01592
g02022_00005__g02022	NA	hypothetical protein	460	0	1	103	2	NA	NA		NA(460)	582	582	105577_PA010_01014	105578_PA017_01654	105579_PA026_01537	105580_PA028_01192	105581_PA029_01503	105583_PA031_00857	105584_PA032_00827	105585_PA033_01436	105586_PA034_01360	105587_PA040_00929	105590_PA048_01528	105593_PA061_01527	105594_PA062_00866	105597_PA065_01588	105601_PA070_01534	105614_PA093_01258	105616_PV004_00882	105636_PV086_01715	105640_PV091_01341	105642_PV093_01201	105746_cerdo_0_1_C1_01713	105747_cerdo_0_1_C2_01690	108479_3070_01270	108481_3072_00713	108483_3074_01079	108486_3077_00803	108491_3082_01190	108492_3083_00759	108494_3085_00784	108498_3089_00973	108504_3095_00914	108508_3099_00428	108524_3325_00713	108528_3330_00992	108546_3348_00053	112371_CAM000139_1663_01593
g00591_00005__g00591	NA	hypothetical protein	460	0	1	104	1	NA	NA		NA(460)	423	423	105577_PA010_00861	105578_PA017_00559	105579_PA026_00178	105580_PA028_00318	105581_PA029_00507	105583_PA031_00399	105584_PA032_00508	105585_PA033_00267	105586_PA034_00937	105587_PA040_00324	105590_PA048_00310	105593_PA061_00466	105594_PA062_00542	105597_PA065_00156	105601_PA070_00605	105614_PA093_00450	105616_PV004_00994	105636_PV086_01468	105640_PV091_00023	105642_PV093_00025	105746_cerdo_0_1_C1_00940	105747_cerdo_0_1_C2_00887	108479_3070_00107	108481_3072_00134	108483_3074_00730	108486_3077_01018	108491_3082_01379	108492_3083_00719	108494_3085_00365	108498_3089_00519	108504_3095_00096	108508_3099_00820	108524_3325_00198	108528_3330_01132	108546_3348_00951	112371_CAM000139_1663_00932
g01546_00005__g01546	tal	Transaldolase	460	0	1	104	2	NA	NA		tal(459):NA(1)	138	987	105577_PA010_00862	105578_PA017_00558	105579_PA026_00179	105580_PA028_00317	105581_PA029_00508	105583_PA031_00398	105584_PA032_00509	105585_PA033_00268	105586_PA034_00938	105587_PA040_00323	105590_PA048_00309	105593_PA061_00467	105594_PA062_00543	105597_PA065_00155	105601_PA070_00604	105614_PA093_00451	105616_PV004_00995	105636_PV086_01467	105640_PV091_00024	105642_PV093_00026	105746_cerdo_0_1_C1_00941	105747_cerdo_0_1_C2_00886	108479_3070_00108	108481_3072_00135	108483_3074_00729	108486_3077_01017	108491_3082_01378	108492_3083_00720	108494_3085_00366	108498_3089_00520	108504_3095_00095	108508_3099_00821	108524_3325_00197	108528_3330_01133	108546_3348_00952	112371_CAM000139_1663_00933
g00976_00005__g00976	gap	Glyceraldehyde-3-phosphate dehydrogenase	460	0	1	105	1	NA	NA		gap(355):gapA(105)	999	999	105577_PA010_00560	105578_PA017_01163	105579_PA026_00626	105580_PA028_01144	105581_PA029_00810	105583_PA031_00537	105584_PA032_00599	105585_PA033_00838	105586_PA034_01190	105587_PA040_01475	105590_PA048_01190	105593_PA061_00283	105594_PA062_00326	105597_PA065_00450	105601_PA070_00401	105614_PA093_00933	105616_PV004_00778	105636_PV086_01164	105640_PV091_01166	105642_PV093_00426	105746_cerdo_0_1_C1_01315	105747_cerdo_0_1_C2_01292	108479_3070_00867	108481_3072_00760	108483_3074_00236	108486_3077_00388	108491_3082_00532	108492_3083_00308	108494_3085_00867	108498_3089_00203	108504_3095_00257	108508_3099_01494	108524_3325_00640	108528_3330_00228	108546_3348_00737	112371_CAM000139_1663_00846
g00952_00005__g00952	pgk	Phosphoglycerate kinase	460	0	1	105	2	NA	NA		pgk(460)	1035	1203	105577_PA010_00561	105578_PA017_01164	105579_PA026_00627	105580_PA028_01145	105581_PA029_00811	105583_PA031_00536	105584_PA032_00598	105585_PA033_00837	105586_PA034_01189	105587_PA040_01476	105590_PA048_01191	105593_PA061_00284	105594_PA062_00327	105597_PA065_00451	105601_PA070_00402	105614_PA093_00934	105616_PV004_00779	105636_PV086_01165	105640_PV091_01165	105642_PV093_00427	105746_cerdo_0_1_C1_01314	105747_cerdo_0_1_C2_01291	108479_3070_00866	108481_3072_00759	108483_3074_00237	108486_3077_00387	108491_3082_00533	108492_3083_00309	108494_3085_00866	108498_3089_00204	108504_3095_00256	108508_3099_01495	108524_3325_00639	108528_3330_00229	108546_3348_00736	112371_CAM000139_1663_00847
g00045_00006__g00045	lutA	Lactate utilization protein A	460	0	1	106	1	NA	NA		lutA(460)	492	738	105577_PA010_01478	105578_PA017_00716	105579_PA026_01006	105580_PA028_00722	105581_PA029_01454	105583_PA031_00723	105584_PA032_01293	105585_PA033_01776	105586_PA034_00374	105587_PA040_00897	105590_PA048_01277	105593_PA061_00976	105594_PA062_01509	105597_PA065_01702	105601_PA070_01723	105614_PA093_01537	105616_PV004_00360	105636_PV086_00865	105640_PV091_00486	105642_PV093_01535	105746_cerdo_0_1_C1_00769	105747_cerdo_0_1_C2_01058	108479_3070_01576	108481_3072_01599	108483_3074_01024	108486_3077_01351	108491_3082_01251	108492_3083_00484	108494_3085_00912	108498_3089_01151	108504_3095_00598	108508_3099_00808	108524_3325_00951	108528_3330_01165	108546_3348_01385	112371_CAM000139_1663_01096
g00050_00006__g00050	lutB	Lactate utilization protein B	460	0	1	106	2	NA	NA		lutB(460)	1440	1440	105577_PA010_01479	105578_PA017_00717	105579_PA026_01007	105580_PA028_00723	105581_PA029_01455	105583_PA031_00724	105584_PA032_01294	105585_PA033_01777	105586_PA034_00375	105587_PA040_00898	105590_PA048_01278	105593_PA061_00977	105594_PA062_01510	105597_PA065_01703	105601_PA070_01724	105614_PA093_01538	105616_PV004_00361	105636_PV086_00866	105640_PV091_00487	105642_PV093_01536	105746_cerdo_0_1_C1_00768	105747_cerdo_0_1_C2_01059	108479_3070_01577	108481_3072_01598	108483_3074_01023	108486_3077_01352	108491_3082_01252	108492_3083_00483	108494_3085_00911	108498_3089_01150	108504_3095_00597	108508_3099_00807	108524_3325_00952	108528_3330_01166	108546_3348_01386	112371_CAM000139_1663_01095
g01557_00005__g01557	ilvE	Branched-chain-amino-acid aminotransferase	460	0	1	107	1	NA	NA		ilvE(460)	597	915	105577_PA010_00838	105578_PA017_01808	105579_PA026_00160	105580_PA028_00336	105581_PA029_00489	105583_PA031_01553	105584_PA032_00488	105585_PA033_00249	105586_PA034_00917	105587_PA040_00352	105590_PA048_00328	105593_PA061_00448	105594_PA062_00524	105597_PA065_00174	105601_PA070_00623	105614_PA093_00429	105616_PV004_00971	105636_PV086_01488	105640_PV091_00004	105642_PV093_00004	105746_cerdo_0_1_C1_00913	105747_cerdo_0_1_C2_00914	108479_3070_01410	108481_3072_01499	108483_3074_00750	108486_3077_01363	108491_3082_00892	108492_3083_01500	108494_3085_01290	108498_3089_01600	108504_3095_01343	108508_3099_01248	108524_3325_01361	108528_3330_01440	108546_3348_01423	112371_CAM000139_1663_00913
g00056_00006__g00056	NA	hypothetical protein	460	0	1	107	2	NA	NA		NA(460)	903	1083	105577_PA010_00837	105578_PA017_01807	105579_PA026_00159	105580_PA028_00337	105581_PA029_00488	105583_PA031_01552	105584_PA032_00487	105585_PA033_00248	105586_PA034_00916	105587_PA040_00353	105590_PA048_00329	105593_PA061_00447	105594_PA062_00523	105597_PA065_00175	105601_PA070_00624	105614_PA093_00428	105616_PV004_00970	105636_PV086_01489	105640_PV091_00003	105642_PV093_00003	105746_cerdo_0_1_C1_00912	105747_cerdo_0_1_C2_00915	108479_3070_01411	108481_3072_01498	108483_3074_00751	108486_3077_01362	108491_3082_00891	108492_3083_01499	108494_3085_01289	108498_3089_01601	108504_3095_01344	108508_3099_01247	108524_3325_01360	108528_3330_01441	108546_3348_01422	112371_CAM000139_1663_00912
g01762_00005__g01762	NA	hypothetical protein	460	0	1	108	1	NA	NA		NA(460)	210	210	105577_PA010_01040	105578_PA017_01401	105579_PA026_01494	105580_PA028_01217	105581_PA029_01158	105583_PA031_00881	105584_PA032_00852	105585_PA033_01412	105586_PA034_01450	105587_PA040_00955	105590_PA048_01586	105593_PA061_01581	105594_PA062_00891	105597_PA065_01643	105601_PA070_01559	105614_PA093_01283	105616_PV004_01517	105636_PV086_01740	105640_PV091_01366	105642_PV093_01226	105746_cerdo_0_1_C1_01738	105747_cerdo_0_1_C2_01715	108479_3070_01037	108481_3072_00688	108483_3074_00962	108486_3077_00369	108491_3082_00773	108492_3083_00360	108494_3085_00251	108498_3089_00950	108504_3095_00439	108508_3099_00834	108524_3325_00477	108528_3330_01116	108546_3348_00722	112371_CAM000139_1663_01568
g01224_00004__g01224	apaH	Bis(5'-nucleosyl)-tetraphosphatase%2C symmetrical	460	0	1	108	2	NA	NA		apaH(459):NA(2)	177	1185	105577_PA010_01039	105578_PA017_01400	105579_PA026_01495	105580_PA028_01216	105581_PA029_01159	105583_PA031_00880	105584_PA032_00851	105585_PA033_01413	105586_PA034_01451	105587_PA040_00954	105590_PA048_01587	105593_PA061_01582	105594_PA062_00890	105597_PA065_01644	105601_PA070_01558	105614_PA093_01282	105616_PV004_01518	105636_PV086_01739	105640_PV091_01365	105642_PV093_01225	105746_cerdo_0_1_C1_01737	105747_cerdo_0_1_C2_01714	108479_3070_01038	108481_3072_00689	108483_3074_00961	108486_3077_00370	108491_3082_00774	108492_3083_00361	108494_3085_00252	108498_3089_00951	108504_3095_00440	108508_3099_00833	108524_3325_00478	108528_3330_01117	108546_3348_00721	112371_CAM000139_1663_01569
g00182_00003__g00182	moaE	Molybdopterin synthase catalytic subunit	460	0	1	109	1	NA	NA		moaE(460)	225	447	105577_PA010_00473	105578_PA017_00923	105579_PA026_00432	105580_PA028_01234	105581_PA029_00562	105583_PA031_01639	105584_PA032_00265	105585_PA033_00673	105586_PA034_00403	105587_PA040_00579	105590_PA048_00800	105593_PA061_00635	105594_PA062_01774	105597_PA065_00353	105601_PA070_00304	105614_PA093_00600	105616_PV004_01149	105636_PV086_00933	105640_PV091_00728	105642_PV093_00684	105746_cerdo_0_1_C1_01518	105747_cerdo_0_1_C2_01508	108479_3070_01315	108481_3072_01686	108483_3074_01602	108486_3077_00978	108491_3082_01256	108492_3083_00905	108494_3085_01333	108498_3089_01126	108504_3095_01367	108508_3099_00475	108524_3325_00037	108528_3330_01434	108546_3348_01188	112371_CAM000139_1663_00750
g00301_00005__g00301	moeA	Molybdopterin molybdenumtransferase	460	0	1	109	2	NA	NA		moeA(459):NA(3)	294	1191	105577_PA010_00472	105578_PA017_00922	105579_PA026_00431	105580_PA028_01235	105581_PA029_00561	105583_PA031_01640	105584_PA032_00264	105585_PA033_00672	105586_PA034_00402	105587_PA040_00578	105590_PA048_00799	105593_PA061_00634	105594_PA062_01775	105597_PA065_00352	105601_PA070_00303	105614_PA093_00599	105616_PV004_01150	105636_PV086_00932	105640_PV091_00729	105642_PV093_00683	105746_cerdo_0_1_C1_01519	105747_cerdo_0_1_C2_01507	108479_3070_01314	108481_3072_01687	108483_3074_01603	108486_3077_00979	108491_3082_01257	108492_3083_00904	108494_3085_01463	108498_3089_01127	108504_3095_01368	108508_3099_00473;108508_3099_00474	108524_3325_00038	108528_3330_01435	108546_3348_01189	112371_CAM000139_1663_00749
g00935_00004__g00935	rocA	1-pyrroline-5-carboxylate dehydrogenase	460	0	1	110	1	NA	NA		rocA(454):putA(5):NA(1)	699	3507	105577_PA010_00487	105578_PA017_00938	105579_PA026_00446	105580_PA028_00984	105581_PA029_00576	105583_PA031_01385	105584_PA032_00279	105585_PA033_00688	105586_PA034_00417	105587_PA040_00594	105590_PA048_00814	105593_PA061_00649	105594_PA062_00395	105597_PA065_00367	105601_PA070_00318	105614_PA093_00615	105616_PV004_01135	105636_PV086_00947	105640_PV091_00713	105642_PV093_00699	105746_cerdo_0_1_C1_01503	105747_cerdo_0_1_C2_01523	108479_3070_01330	108481_3072_00531	108483_3074_00711	108486_3077_00322	108491_3082_00935	108492_3083_00740	108494_3085_00189	108498_3089_01491	108504_3095_00818	108508_3099_00489	108524_3325_00022	108528_3330_00775	108546_3348_01007	112371_CAM000139_1663_00764
g01803_00005__g01803	putP	High-affinity proline transporter PutP	460	0	1	110	2	NA	NA		putP(460)	324	1482	105577_PA010_00488	105578_PA017_00939	105579_PA026_00447	105580_PA028_00985	105581_PA029_00577	105583_PA031_01386	105584_PA032_00280	105585_PA033_00689	105586_PA034_00418	105587_PA040_00595	105590_PA048_00815	105593_PA061_00650	105594_PA062_00396	105597_PA065_00368	105601_PA070_00319	105614_PA093_00616	105616_PV004_01134	105636_PV086_00948	105640_PV091_00712	105642_PV093_00700	105746_cerdo_0_1_C1_01502	105747_cerdo_0_1_C2_01524	108479_3070_01329	108481_3072_00530	108483_3074_00710	108486_3077_00321	108491_3082_00936	108492_3083_00741	108494_3085_00188	108498_3089_01490	108504_3095_00819	108508_3099_00490	108524_3325_00021	108528_3330_00774	108546_3348_01006	112371_CAM000139_1663_00765
g00683_00004__g00683	surE	5'-nucleotidase SurE	460	0	1	111	1	NA	NA		surE(460)	477	780	105577_PA010_00878	105578_PA017_00542	105579_PA026_00196	105580_PA028_00300	105581_PA029_00525	105583_PA031_00385	105584_PA032_00526	105585_PA033_00281	105586_PA034_00955	105587_PA040_00307	105590_PA048_00292	105593_PA061_00484	105594_PA062_00560	105597_PA065_00138	105601_PA070_00587	105614_PA093_00468	105616_PV004_01479	105636_PV086_01454	105640_PV091_00040	105642_PV093_00042	105746_cerdo_0_1_C1_00956	105747_cerdo_0_1_C2_00871	108479_3070_00126	108481_3072_00153	108483_3074_01406	108486_3077_01134	108491_3082_01304	108492_3083_01380	108494_3085_01412	108498_3089_00535	108504_3095_00078	108508_3099_01191	108524_3325_01002	108528_3330_00762	108546_3348_01505	112371_CAM000139_1663_00949
g01324_00005__g01324	tcdA	tRNA threonylcarbamoyladenosine dehydratase	460	0	1	111	2	NA	NA		tcdA(458):NA(3)	288	657	105577_PA010_00879	105578_PA017_00541	105579_PA026_00197	105580_PA028_00299	105581_PA029_00526	105583_PA031_00384	105584_PA032_00527	105585_PA033_00282	105586_PA034_00956	105587_PA040_00306	105590_PA048_00291	105593_PA061_00485	105594_PA062_00561	105597_PA065_00137	105601_PA070_00586	105614_PA093_00469	105616_PV004_01478	105636_PV086_01453	105640_PV091_00041	105642_PV093_00043	105746_cerdo_0_1_C1_00957	105747_cerdo_0_1_C2_00870	108479_3070_00127	108481_3072_00154	108483_3074_01405	108486_3077_01133	108491_3082_01303	108492_3083_01379	108494_3085_01413	108498_3089_00536	108504_3095_00077	108508_3099_01190	108524_3325_01001	108528_3330_00763	108546_3348_01506	112371_CAM000139_1663_00950
g00804_1_00005__g00804_1	argC	N-acetyl-gamma-glutamyl-phosphate reductase	460	0	1	112	1	NA	NA		argC(462)	267	1029	105577_PA010_01263	105578_PA017_01433	105579_PA026_01262	105580_PA028_01047	105581_PA029_00854	105583_PA031_01323	105584_PA032_01264	105585_PA033_00545	105586_PA034_01151	105587_PA040_01702	105590_PA048_01317	105593_PA061_01167	105594_PA062_01157	105597_PA065_01379	105601_PA070_01486	105614_PA093_00391	105616_PV004_00567	105636_PV086_01667	105640_PV091_01246	105642_PV093_01056	105746_cerdo_0_1_C1_01664	105747_cerdo_0_1_C2_01662	108479_3070_00786	108481_3072_00607	108483_3074_00516	108486_3077_00549	108491_3082_00147	108492_3083_00291	108494_3085_00982	108498_3089_00840	108504_3095_00161	108508_3099_00273	108524_3325_01162	108528_3330_00159	108546_3348_00086	112371_CAM000139_1663_01520
g01691_00004__g01691	ypeA	Acetyltransferase YpeA	460	0	1	112	2	NA	NA		ypeA(459):NA(1)	297	447	105577_PA010_01264	105578_PA017_01434	105579_PA026_01263	105580_PA028_01048	105581_PA029_00855	105583_PA031_01322	105584_PA032_01265	105585_PA033_00546	105586_PA034_01152	105587_PA040_01703	105590_PA048_01318	105593_PA061_01168	105594_PA062_01158	105597_PA065_01380	105601_PA070_01487	105614_PA093_00392	105616_PV004_00568	105636_PV086_01668	105640_PV091_01247	105642_PV093_01057	105746_cerdo_0_1_C1_01665	105747_cerdo_0_1_C2_01661	108479_3070_00787	108481_3072_00606	108483_3074_00515	108486_3077_00550	108491_3082_00148	108492_3083_00290	108494_3085_00981	108498_3089_00839	108504_3095_00162	108508_3099_00272	108524_3325_01163	108528_3330_00160	108546_3348_00085	112371_CAM000139_1663_01521
g00925_00003__g00925	hemA	Glutamyl-tRNA reductase	460	0	1	113	1	NA	NA		hemA(462)	225	1299	105577_PA010_00233	105578_PA017_00296	105579_PA026_00727	105580_PA028_00597	105581_PA029_01187	105583_PA031_00093	105584_PA032_00059	105585_PA033_00649	105586_PA034_00156	105587_PA040_00062	105590_PA048_00593	105593_PA061_00851	105594_PA062_00107	105597_PA065_01458	105601_PA070_00724	105614_PA093_00057	105616_PV004_00846	105636_PV086_00536	105640_PV091_00237	105642_PV093_00913;105642_PV093_01837	105746_cerdo_0_1_C1_00563	105747_cerdo_0_1_C2_00620	108479_3070_00306	108481_3072_00018	108483_3074_00003	108486_3077_00219	108491_3082_00081	108492_3083_00659	108494_3085_00967	108498_3089_00004	108504_3095_01123	108508_3099_00039	108524_3325_00086	108528_3330_00082	108546_3348_01239	112371_CAM000139_1663_00597
g00508_00005__g00508	proS	Proline--tRNA ligase	460	0	1	113	2	NA	NA		proS(461)	438	1707	105577_PA010_00234	105578_PA017_00295	105579_PA026_00728	105580_PA028_00598	105581_PA029_01188	105583_PA031_00094	105584_PA032_00058	105585_PA033_00650	105586_PA034_00155	105587_PA040_00061	105590_PA048_00594	105593_PA061_00852	105594_PA062_00108	105597_PA065_01459	105601_PA070_00725	105614_PA093_00056	105616_PV004_00847	105636_PV086_00537	105640_PV091_00236	105642_PV093_00912	105746_cerdo_0_1_C1_00564	105747_cerdo_0_1_C2_00619	108479_3070_00307	108481_3072_00017	108483_3074_00002	108486_3077_00218	108491_3082_00082	108492_3083_00660	108494_3085_00968	108498_3089_00003	108504_3095_01124	108508_3099_00038	108524_3325_00087	108528_3330_00081	108546_3348_01240	112371_CAM000139_1663_00596
g01582_00005__g01582	btuF	Vitamin B12-binding protein	460	0	1	114	1	NA	NA		btuF(459):NA(3)	318	807	105577_PA010_00399	105578_PA017_00639	105579_PA026_01250	105580_PA028_00645	105581_PA029_00680	105583_PA031_01720	105584_PA032_01151	105585_PA033_01152	105586_PA034_00298	105587_PA040_01111	105590_PA048_01060	105593_PA061_00598	105594_PA062_00768	105597_PA065_00677	105601_PA070_00962	105614_PA093_00214	105616_PV004_00202	105636_PV086_00788	105640_PV091_00410	105642_PV093_01610	105746_cerdo_0_1_C1_00851	105747_cerdo_0_1_C2_00976	108479_3070_00226	108481_3072_00240	108483_3074_00549	108486_3077_00612	108491_3082_01044	108492_3083_01294	108494_3085_00586	108498_3089_00126	108504_3095_00239	108508_3099_00382	108524_3325_01271	108528_3330_00177	108546_3348_01150	112371_CAM000139_1663_01172
g00993_00005__g00993	moaA	GTP 3'%2C8-cyclase	460	0	1	114	2	NA	NA		moaA(433):NA(27)	534	915	105577_PA010_00400	105578_PA017_00640	105579_PA026_01251	105580_PA028_00646	105581_PA029_00681	105583_PA031_01721	105584_PA032_01152	105585_PA033_01153	105586_PA034_00299	105587_PA040_01112	105590_PA048_01061	105593_PA061_00599	105594_PA062_00769	105597_PA065_00678	105601_PA070_00963	105614_PA093_00215	105616_PV004_00203	105636_PV086_00789	105640_PV091_00411	105642_PV093_01611	105746_cerdo_0_1_C1_00850	105747_cerdo_0_1_C2_00977	108479_3070_00227	108481_3072_00239	108483_3074_00548	108486_3077_00613	108491_3082_01045	108492_3083_01293	108494_3085_00587	108498_3089_00125	108504_3095_00240	108508_3099_00383	108524_3325_01270	108528_3330_00176	108546_3348_01149	112371_CAM000139_1663_01171
g00423_00005__g00423	NA	hypothetical protein	460	0	1	115	1	NA	NA		NA(460)	870	1827	105577_PA010_00524	105578_PA017_00975	105579_PA026_00483	105580_PA028_01021	105581_PA029_00613	105583_PA031_01286	105584_PA032_00316	105585_PA033_00726	105586_PA034_00454	105587_PA040_00632	105590_PA048_00851	105593_PA061_00686	105594_PA062_00432	105597_PA065_00404	105601_PA070_00355	105614_PA093_00652	105616_PV004_01176	105636_PV086_00984	105640_PV091_00676	105642_PV093_00736	105746_cerdo_0_1_C1_01359	105747_cerdo_0_1_C2_01336	108479_3070_00726	108481_3072_00493	108483_3074_00892	108486_3077_00340	108491_3082_00475	108492_3083_01156	108494_3085_01065	108498_3089_01378	108504_3095_00691	108508_3099_01103	108524_3325_01102	108528_3330_00408	108546_3348_00794	112371_CAM000139_1663_00801
g00467_00004__g00467	NA	hypothetical protein	460	0	1	115	2	NA	NA		NA(461)	375	765	105577_PA010_00523	105578_PA017_00974	105579_PA026_00482	105580_PA028_01020	105581_PA029_00612	105583_PA031_01287	105584_PA032_00315	105585_PA033_00725	105586_PA034_00453	105587_PA040_00631	105590_PA048_00850	105593_PA061_00685	105594_PA062_00431	105597_PA065_00403	105601_PA070_00354	105614_PA093_00651	105616_PV004_01177	105636_PV086_00983	105640_PV091_00677	105642_PV093_00735	105746_cerdo_0_1_C1_01360	105747_cerdo_0_1_C2_01337	108479_3070_00727	108481_3072_00494	108483_3074_00893	108486_3077_00341	108491_3082_00476	108492_3083_01155	108494_3085_01066	108498_3089_01379	108504_3095_00690	108508_3099_01102	108524_3325_01101	108528_3330_00407	108546_3348_00793	112371_CAM000139_1663_00800
g00627_00005__g00627	tig	Trigger factor	460	0	1	116	1	NA	NA		tig(460)	1269	1335	105577_PA010_01052	105578_PA017_01412	105579_PA026_01483	105580_PA028_01228	105581_PA029_01147	105583_PA031_00889	105584_PA032_00863	105585_PA033_01404	105586_PA034_01439	105587_PA040_00963	105590_PA048_01575	105593_PA061_01570	105594_PA062_00902	105597_PA065_01632	105601_PA070_01570	105614_PA093_01294	105616_PV004_01505	105636_PV086_01751	105640_PV091_01378	105642_PV093_01238	105746_cerdo_0_1_C1_01749	105747_cerdo_0_1_C2_01726	108479_3070_01026	108481_3072_00677	108483_3074_00973	108486_3077_00358	108491_3082_01114	108492_3083_00349	108494_3085_00962	108498_3089_00938	108504_3095_00427	108508_3099_00845	108524_3325_00465	108528_3330_00888	108546_3348_00756	112371_CAM000139_1663_01557
g02018_00005__g02018	clpP	ATP-dependent Clp protease proteolytic subunit	460	0	1	116	2	NA	NA		clpP(460)	585	585	105577_PA010_01051	105578_PA017_01411	105579_PA026_01484	105580_PA028_01227	105581_PA029_01148	105583_PA031_00888	105584_PA032_00862	105585_PA033_01405	105586_PA034_01440	105587_PA040_00962	105590_PA048_01576	105593_PA061_01571	105594_PA062_00901	105597_PA065_01633	105601_PA070_01569	105614_PA093_01293	105616_PV004_01506	105636_PV086_01750	105640_PV091_01377	105642_PV093_01237	105746_cerdo_0_1_C1_01748	105747_cerdo_0_1_C2_01725	108479_3070_01027	108481_3072_00678	108483_3074_00972	108486_3077_00359	108491_3082_01115	108492_3083_00350	108494_3085_00963	108498_3089_00939	108504_3095_00428	108508_3099_00844	108524_3325_00466	108528_3330_00887	108546_3348_00757	112371_CAM000139_1663_01558
g01453_1_00005__g01453_1	thrC	Threonine synthase	460	0	1	117	1	NA	NA		thrC(456):NA(4)	252	1413	105577_PA010_00662	105578_PA017_01327	105579_PA026_00828	105580_PA028_00970	105581_PA029_00481	105583_PA031_00666	105584_PA032_01186	105585_PA033_00184	105586_PA034_00759	105587_PA040_01049	105590_PA048_00923	105593_PA061_00930	105594_PA062_00519	105597_PA065_00984	105601_PA070_01401	105614_PA093_00684	105616_PV004_00257	105636_PV086_01325	105640_PV091_00811	105642_PV093_00337	105746_cerdo_0_1_C1_01420	105747_cerdo_0_1_C2_01397	108479_3070_00433	108481_3072_00344	108483_3074_00989	108486_3077_00446	108491_3082_00628	108492_3083_00453	108494_3085_00687	108498_3089_00346	108504_3095_00901	108508_3099_01142	108524_3325_01277	108528_3330_01431	108546_3348_01362	112371_CAM000139_1663_01500
g01307_00004__g01307	kdsB	3-deoxy-manno-octulosonate cytidylyltransferase	460	0	1	117	2	NA	NA		kdsB(460)	360	720	105577_PA010_00661	105578_PA017_01326	105579_PA026_00829	105580_PA028_00971	105581_PA029_00482	105583_PA031_00665	105584_PA032_01185	105585_PA033_00183	105586_PA034_00760	105587_PA040_01050	105590_PA048_00922	105593_PA061_00931	105594_PA062_00520	105597_PA065_00983	105601_PA070_01402	105614_PA093_00683	105616_PV004_00256	105636_PV086_01324	105640_PV091_00810	105642_PV093_00336	105746_cerdo_0_1_C1_01419	105747_cerdo_0_1_C2_01396	108479_3070_00432	108481_3072_00345	108483_3074_00990	108486_3077_00447	108491_3082_00629	108492_3083_00452	108494_3085_00688	108498_3089_00347	108504_3095_00902	108508_3099_01143	108524_3325_01276	108528_3330_01432	108546_3348_01363	112371_CAM000139_1663_01501
g00505_1_00006__g00505_1	pbpF	hypothetical protein	460	0	2	118	1	NA	NA		NA(459):pbpF(456):ftsI(3):mrcA(3)	183	1932	105577_PA010_00202;105577_PA010_00215	105578_PA017_00314;105578_PA017_00327	105579_PA026_00696;105579_PA026_00709	105580_PA028_00566;105580_PA028_00579	105581_PA029_00302;105581_PA029_00315	105583_PA031_00062;105583_PA031_00075	105584_PA032_00077;105584_PA032_00090	105585_PA033_00618;105585_PA033_00631	105586_PA034_00174;105586_PA034_00187	105587_PA040_00080;105587_PA040_00093	105590_PA048_00562;105590_PA048_00575	105593_PA061_00820;105593_PA061_00833	105594_PA062_00076;105594_PA062_00089	105597_PA065_00826;105597_PA065_00839	105601_PA070_00693;105601_PA070_00706	105614_PA093_00075;105614_PA093_00088	105616_PV004_01037;105616_PV004_01050	105636_PV086_00505;105636_PV086_00518	105640_PV091_00255;105640_PV091_00268	105642_PV093_00561;105642_PV093_00574	105746_cerdo_0_1_C1_00532;105746_cerdo_0_1_C1_00545	105747_cerdo_0_1_C2_00638;105747_cerdo_0_1_C2_00651	108479_3070_00288;108479_3070_01284	108481_3072_00036;108481_3072_00049	108483_3074_00021;108483_3074_00034	108486_3077_00176;108486_3077_00189	108491_3082_00565;108491_3082_00997	108492_3083_00185;108492_3083_00198	108494_3085_00094;108494_3085_00095;108494_3085_00626	108498_3089_00022;108498_3089_00035	108504_3095_00487;108504_3095_01050	108508_3099_00057;108508_3099_00070	108524_3325_00400;108524_3325_00413	108528_3330_00356;108528_3330_01217	108546_3348_00291;108546_3348_00387	112371_CAM000139_1663_00615;112371_CAM000139_1663_00628
g01209_00005__g01209	acs	Acetyl-coenzyme A synthetase	460	0	1	119	1	NA	NA		acs(460):acsA(1)	708	1974	105577_PA010_01691	105578_PA017_00906	105579_PA026_00416	105580_PA028_01250	105581_PA029_01321	105583_PA031_00938	105584_PA032_00677	105585_PA033_00607	105586_PA034_01234	105587_PA040_01555	105590_PA048_00782	105593_PA061_01503	105594_PA062_01780	105597_PA065_01347	105601_PA070_00288	105614_PA093_01412	105616_PV004_00964	105636_PV086_00917	105640_PV091_00744	105642_PV093_01250;105642_PV093_01803	105746_cerdo_0_1_C1_01533	105747_cerdo_0_1_C2_01493	108479_3070_01485	108481_3072_01031	108483_3074_01209	108486_3077_00876	108491_3082_00357	108492_3083_01306	108494_3085_00534	108498_3089_01300	108504_3095_00310	108508_3099_01404	108524_3325_00662	108528_3330_01426	108546_3348_01130	112371_CAM000139_1663_00734
g01052_00005__g01052	rbr1	Rubrerythrin-1	460	0	1	120	1	NA	NA		rbr1(460):NA(1)	288	651	105577_PA010_00015	105578_PA017_00748	105579_PA026_00299	105580_PA028_01490	105581_PA029_00015	105583_PA031_00758	105584_PA032_01524	105585_PA033_00015	105586_PA034_00795	105587_PA040_01129	105590_PA048_00648	105593_PA061_00015	105594_PA062_00717	105597_PA065_00498	105601_PA070_00777	105614_PA093_01121	105616_PV004_01122	105636_PV086_01026	105640_PV091_01195	105642_PV093_01005	105746_cerdo_0_1_C1_01113	105747_cerdo_0_1_C2_01090	108479_3070_00939	108481_3072_00963	108483_3074_00924	108486_3077_00718	108491_3082_00263	108492_3083_01072	108494_3085_00176	108498_3089_00719	108504_3095_00413	108508_3099_00228	108524_3325_00186	108528_3330_00129	108546_3348_00891	112371_CAM000139_1663_01352
g00926_1_00006__g00926_1	NA	hypothetical protein	460	0	1	121	1	NA	NA		NA(460)	543	1296	105577_PA010_00455	105578_PA017_00694	105579_PA026_00984	105580_PA028_00700	105581_PA029_01013	105583_PA031_00704	105584_PA032_01099	105585_PA033_01329	105586_PA034_00352	105587_PA040_00878	105590_PA048_01255	105593_PA061_00954	105594_PA062_01010	105597_PA065_00731	105601_PA070_01016	105614_PA093_00268	105616_PV004_00338	105636_PV086_00843	105640_PV091_00464	105642_PV093_00971	105746_cerdo_0_1_C1_00791	105747_cerdo_0_1_C2_01036	108479_3070_01429	108481_3072_01420	108483_3074_00637	108486_3077_00511	108491_3082_01076	108492_3083_00822	108494_3085_00504	108498_3089_00603	108504_3095_01001	108508_3099_00095	108524_3325_00839	108528_3330_00744	108546_3348_01211	112371_CAM000139_1663_01118
g00844_00003__g00844	NA	hypothetical protein	460	0	1	122	1	NA	NA		NA(461)	339	732	105577_PA010_01697	105578_PA017_00912	105579_PA026_00422	105580_PA028_01244	105581_PA029_01792	105583_PA031_01815;105583_PA031_01937	105584_PA032_00254	105585_PA033_01692	105586_PA034_01240	105587_PA040_01529	105590_PA048_00788	105593_PA061_01509	105594_PA062_01824	105597_PA065_01341	105601_PA070_00294	105614_PA093_01418	105616_PV004_01728	105636_PV086_00923	105640_PV091_00738	105642_PV093_01244	105746_cerdo_0_1_C1_01527	105747_cerdo_0_1_C2_01499	108479_3070_01627	108481_3072_01601	108483_3074_01203	108486_3077_00870	108491_3082_01272	108492_3083_01345	108494_3085_01398	108498_3089_01306	108504_3095_00316	108508_3099_01594	108524_3325_01237	108528_3330_01447	108546_3348_01381	112371_CAM000139_1663_00740
g01835_00006__g01835	gyrA	DNA gyrase subunit A	460	0	1	123	1	NA	NA		gyrA(460)	252	2577	105577_PA010_00928	105578_PA017_00029	105579_PA026_00114	105580_PA028_00114	105581_PA029_01049	105583_PA031_00842	105584_PA032_01162	105585_PA033_01494	105586_PA034_00657	105587_PA040_01324	105590_PA048_00114	105593_PA061_01267	105594_PA062_00959	105597_PA065_01147	105601_PA070_00054	105614_PA093_00805	105616_PV004_00540	105636_PV086_00222	105640_PV091_00923	105642_PV093_00251	105746_cerdo_0_1_C1_00230	105747_cerdo_0_1_C2_00225	108479_3070_00830	108481_3072_01212	108483_3074_00658	108486_3077_00121	108491_3082_00378	108492_3083_00388	108494_3085_00441	108498_3089_00637	108504_3095_00020	108508_3099_00572	108524_3325_00239	108528_3330_00895	108546_3348_00764	112371_CAM000139_1663_00222
g00255_2_00001__g00255_2	glnQ	Glutamine transport ATP-binding protein GlnQ	460	0	1	124	1	NA	NA		glnQ(461):artM(1)	144	729	105577_PA010_01816	105578_PA017_01635	105579_PA026_01574	105580_PA028_01093	105581_PA029_01476	105583_PA031_01530	105584_PA032_01321	105585_PA033_01541	105586_PA034_01325	105587_PA040_00484	105590_PA048_01640	105593_PA061_00198	105594_PA062_00812	105597_PA065_01024	105601_PA070_01100	105614_PA093_01210	105616_PV004_01076	105636_PV086_00071	105640_PV091_01600	105642_PV093_01573	105746_cerdo_0_1_C1_00380	105747_cerdo_0_1_C2_00075	108479_3070_00984	108481_3072_00661	108483_3074_01051	108486_3077_00595	108491_3082_00501	108492_3083_01217	108494_3085_00602	108498_3089_01264	108504_3095_01173	108508_3099_00928	108524_3325_01134	108528_3330_01053	108546_3348_00924	112371_CAM000139_1663_00368
g00988_00005__g00988	cntB	Metal-staphylopine import system permease protein CntB	460	0	1	125	1	NA	NA		cntB(460)	945	963	105577_PA010_01446	105578_PA017_00597	105579_PA026_01209	105580_PA028_01440	105581_PA029_00639	105583_PA031_01244	105584_PA032_01493	105585_PA033_01024	105586_PA034_00256	105587_PA040_01069	105590_PA048_01019	105593_PA061_00557	105594_PA062_01544	105597_PA065_00636	105601_PA070_00921	105614_PA093_00173	105616_PV004_00159	105636_PV086_00747	105640_PV091_00368	105642_PV093_01439	105746_cerdo_0_1_C1_00890	105747_cerdo_0_1_C2_00937	108479_3070_01021	108481_3072_00281	108483_3074_00772	108486_3077_00941	108491_3082_01135	108492_3083_00945	108494_3085_00845	108498_3089_00168	108504_3095_00856	108508_3099_00995	108524_3325_00282	108528_3330_01024	108546_3348_00834	112371_CAM000139_1663_01207
g00579_00004__g00579	NA	hypothetical protein	460	0	1	126	1	NA	NA		NA(461)	216	603	105577_PA010_00444	105578_PA017_00683	105579_PA026_00973	105580_PA028_00689	105581_PA029_01024	105583_PA031_00693	105584_PA032_01110	105585_PA033_01318	105586_PA034_00341	105587_PA040_00867	105590_PA048_01244	105593_PA061_00943	105594_PA062_01021	105597_PA065_00720	105601_PA070_01005	105614_PA093_00257	105616_PV004_00327	105636_PV086_00832	105640_PV091_00453	105642_PV093_00960	105746_cerdo_0_1_C1_00802	105747_cerdo_0_1_C2_01025	108479_3070_00270	108481_3072_01362	108483_3074_00626	108486_3077_01011	108491_3082_00461	108492_3083_00568	108494_3085_00318	108498_3089_00592	108504_3095_00185	108508_3099_00106	108524_3325_00578	108528_3330_00521	108546_3348_00458	112371_CAM000139_1663_01129
g01365_00005__g01365	bcp	Putative peroxiredoxin bcp	460	0	1	127	1	NA	NA		bcp(461)	264	459	105577_PA010_00840	105578_PA017_01810	105579_PA026_00162	105580_PA028_00334	105581_PA029_00491	105583_PA031_01555	105584_PA032_00490	105585_PA033_00251	105586_PA034_00919	105587_PA040_00343	105590_PA048_00326	105593_PA061_00450	105594_PA062_00526	105597_PA065_00172	105601_PA070_00621	105614_PA093_00431	105616_PV004_00973	105636_PV086_01486	105640_PV091_00006	105642_PV093_00006	105746_cerdo_0_1_C1_00922	105747_cerdo_0_1_C2_00905	108479_3070_01408	108481_3072_01501	108483_3074_00748	108486_3077_01280	108491_3082_00894	108492_3083_01524	108494_3085_00696	108498_3089_01535	108504_3095_01341	108508_3099_01250	108524_3325_00219	108528_3330_01021	108546_3348_01033	112371_CAM000139_1663_00915
g01204_00004__g01204	bamA	Outer membrane protein assembly factor BamA	460	0	1	128	1	NA	NA		bamA(461)	435	2220	105577_PA010_00126	105578_PA017_00859	105579_PA026_01464	105580_PA028_00900	105581_PA029_00125	105583_PA031_00488;105583_PA031_01878	105584_PA032_00474	105585_PA033_00130	105586_PA034_00557	105587_PA040_00980	105590_PA048_00758	105593_PA061_00125	105594_PA062_00298	105597_PA065_00608	105601_PA070_00887	105614_PA093_00905	105616_PV004_00931	105636_PV086_01136	105640_PV091_01027	105642_PV093_00839	105746_cerdo_0_1_C1_01238	105747_cerdo_0_1_C2_01215	108479_3070_00353	108481_3072_00867	108483_3074_01189	108486_3077_00706	108491_3082_01033	108492_3083_00113	108494_3085_00243	108498_3089_00324	108504_3095_00671	108508_3099_01330	108524_3325_00791	108528_3330_00456	108546_3348_01139	112371_CAM000139_1663_01242
g00849_00003__g00849	NA	hypothetical protein	460	0	1	129	1	NA	NA		NA(460)	195	663	105577_PA010_01242	105578_PA017_01372	105579_PA026_00783	105580_PA028_00925	105581_PA029_00436	105583_PA031_01155	105584_PA032_01062	105585_PA033_00228	105586_PA034_00715	105587_PA040_01004	105590_PA048_00968	105593_PA061_00885	105594_PA062_00474	105597_PA065_01274	105601_PA070_01356	105614_PA093_00729	105616_PV004_00302	105636_PV086_01370	105640_PV091_00856	105642_PV093_00382	105746_cerdo_0_1_C1_01464	105747_cerdo_0_1_C2_01441	108479_3070_00478	108481_3072_00299	108483_3074_00472	108486_3077_01029	108491_3082_00240	108492_3083_00525	108494_3085_01176	108498_3089_01101	108504_3095_00334	108508_3099_01050	108524_3325_00588	108528_3330_00440	108546_3348_00677	112371_CAM000139_1663_01455
g00036_00006__g00036	fba	Fructose-bisphosphate aldolase	460	0	1	130	1	NA	NA		fba(460)	1065	1065	105577_PA010_00738	105578_PA017_01105	105579_PA026_00934	105580_PA028_01368	105581_PA029_00892	105583_PA031_00986	105584_PA032_00907	105585_PA033_01063	105586_PA034_00885	105587_PA040_01573	105590_PA048_01358	105593_PA061_01430	105594_PA062_01081	105597_PA065_01114	105601_PA070_01310	105614_PA093_01044	105616_PV004_00473	105636_PV086_01538	105640_PV091_00553	105642_PV093_01139	105746_cerdo_0_1_C1_01596	105747_cerdo_0_1_C2_01599	108479_3070_00506	108481_3072_01490	108483_3074_01391	108486_3077_00275	108491_3082_00971	108492_3083_01041	108494_3085_00609	108498_3089_00746	108504_3095_00959	108508_3099_01219	108524_3325_01097	108528_3330_00307	108546_3348_00140	112371_CAM000139_1663_01411
g00550_1_00004__g00550_1	NA	hypothetical protein	460	0	1	131	1	NA	NA		NA(461)	273	990	105577_PA010_00151	105578_PA017_00378	105579_PA026_01048	105580_PA028_00515	105581_PA029_00251	105583_PA031_00596	105584_PA032_00141	105585_PA033_00989	105586_PA034_00238	105587_PA040_00144	105590_PA048_00511	105593_PA061_01127	105594_PA062_00025	105597_PA065_00775	105601_PA070_00642	105614_PA093_00139	105616_PV004_00408	105636_PV086_00454	105640_PV091_00319	105642_PV093_00510	105746_cerdo_0_1_C1_00481	105747_cerdo_0_1_C2_00702	108479_3070_00602	108481_3072_00100	108483_3074_01226	108486_3077_01596	108491_3082_00942	108492_3083_00215	108494_3085_01263	108498_3089_00086	108504_3095_00520	108508_3099_00951	108524_3325_00959	108528_3330_00016	108546_3348_00112	112371_CAM000139_1663_00679
g00298_00003__g00298	NA	hypothetical protein	460	0	1	132	1	NA	NA		NA(557)	201	1341	105577_PA010_01467	105578_PA017_00276	105579_PA026_01156	105580_PA028_00463	105581_PA029_00720	105583_PA031_01024;105583_PA031_01359	105584_PA032_00040	105585_PA033_00893;105585_PA033_01618	105586_PA034_00137	105587_PA040_00038	105590_PA048_00468	105593_PA061_01030	105594_PA062_01128	105597_PA065_00314	105601_PA070_01443	105614_PA093_00037	105616_PV004_00136	105636_PV086_00725	105640_PV091_00217	105642_PV093_00413;105642_PV093_00893	105746_cerdo_0_1_C1_00584	105747_cerdo_0_1_C2_00599	108479_3070_00326	108481_3072_00534	108483_3074_00187	108486_3077_00409	108491_3082_01421	108492_3083_00017	108494_3085_01302	108498_3089_01216	108504_3095_00042	108508_3099_00019	108524_3325_00106	108528_3330_01199	108546_3348_00613	112371_CAM000139_1663_00577
g00761_00004__g00761	tdcG	L-serine dehydratase TdcG	460	0	1	133	1	NA	NA		tdcG(455):sdaB(3):sdaA(2)	798	1365	105577_PA010_00411	105578_PA017_00652	105579_PA026_01409	105580_PA028_00657	105581_PA029_01666	105583_PA031_01648	105584_PA032_01211	105585_PA033_01165	105586_PA034_00310	105587_PA040_00837	105590_PA048_01072	105593_PA061_00610	105594_PA062_00780	105597_PA065_00689	105601_PA070_00974	105614_PA093_00226	105616_PV004_00214	105636_PV086_00800	105640_PV091_00423	105642_PV093_00930	105746_cerdo_0_1_C1_00832	105747_cerdo_0_1_C2_00995	108479_3070_00238	108481_3072_00228	108483_3074_00537	108486_3077_00769	108491_3082_01438	108492_3083_01358	108494_3085_00350	108498_3089_00113	108504_3095_01116	108508_3099_01587	108524_3325_01444	108528_3330_01501	108546_3348_00873	112371_CAM000139_1663_01160
g02045_00005__g02045	infC	Translation initiation factor IF-3	460	0	1	134	1	NA	NA		infC(460)	519	519	105577_PA010_01261	105578_PA017_01431	105579_PA026_01260	105580_PA028_01045	105581_PA029_00852	105583_PA031_01325	105584_PA032_01262	105585_PA033_00543	105586_PA034_01149	105587_PA040_01700	105590_PA048_01315	105593_PA061_01165	105594_PA062_01155	105597_PA065_01377	105601_PA070_01484	105614_PA093_00389	105616_PV004_00565	105636_PV086_01665	105640_PV091_01244	105642_PV093_01054	105746_cerdo_0_1_C1_01662	105747_cerdo_0_1_C2_01664	108479_3070_00784	108481_3072_00609	108483_3074_00518	108486_3077_00547	108491_3082_00145	108492_3083_00293	108494_3085_01014	108498_3089_00842	108504_3095_00159	108508_3099_00275	108524_3325_01160	108528_3330_00157	108546_3348_00088	112371_CAM000139_1663_01518
g01363_00003__g01363	coaD	Phosphopantetheine adenylyltransferase	460	0	1	135	1	NA	NA		coaD(460)	423	477	105577_PA010_01244	105578_PA017_01374	105579_PA026_00781	105580_PA028_00923	105581_PA029_00434	105583_PA031_01157	105584_PA032_01060	105585_PA033_00230	105586_PA034_00713	105587_PA040_01002	105590_PA048_00970	105593_PA061_00883	105594_PA062_00472	105597_PA065_01272	105601_PA070_01354	105614_PA093_00731	105616_PV004_00304	105636_PV086_01372	105640_PV091_00858	105642_PV093_00384	105746_cerdo_0_1_C1_01466	105747_cerdo_0_1_C2_01443	108479_3070_00480	108481_3072_00297	108483_3074_00474	108486_3077_01031	108491_3082_00242	108492_3083_00523	108494_3085_01178	108498_3089_01099	108504_3095_00332	108508_3099_01052	108524_3325_00590	108528_3330_00442	108546_3348_00679	112371_CAM000139_1663_01453
g00676_00001__g00676	NA	hypothetical protein	460	0	1	136	1	NA	NA		NA(460)	522	825	105577_PA010_00080	105578_PA017_00814	105579_PA026_00364	105580_PA028_00855	105581_PA029_00080	105583_PA031_00438	105584_PA032_00429	105585_PA033_00080	105586_PA034_00512	105587_PA040_01194	105590_PA048_00713	105593_PA061_00080	105594_PA062_00253	105597_PA065_00563	105601_PA070_00842	105614_PA093_00858	105616_PV004_00634	105636_PV086_01091	105640_PV091_00982	105642_PV093_00794	105746_cerdo_0_1_C1_01179	105747_cerdo_0_1_C2_01156	108479_3070_00398	108481_3072_01431	108483_3074_00308	108486_3077_00028	108491_3082_00137	108492_3083_00668	108494_3085_00010	108498_3089_00279	108504_3095_00740	108508_3099_00290	108524_3325_01196	108528_3330_00243	108546_3348_00342	112371_CAM000139_1663_01287
g00034_00006__g00034	radA	DNA repair protein RadA	460	0	1	137	1	NA	NA		radA(460)	768	1341	105577_PA010_00971	105578_PA017_00208	105579_PA026_00875	105580_PA028_00764	105581_PA029_01122	105583_PA031_00288	105584_PA032_00799	105585_PA033_00501	105586_PA034_00978	105587_PA040_01378	105590_PA048_01124	105593_PA061_01213	105594_PA062_00670	105597_PA065_01224	105601_PA070_00225	105614_PA093_01166	105616_PV004_00718	105636_PV086_00398	105640_PV091_00626	105642_PV093_01122	105746_cerdo_0_1_C1_00046	105747_cerdo_0_1_C2_00409	108479_3070_00628	108481_3072_00370	108483_3074_00138	108486_3077_00488	108491_3082_00303	108492_3083_00244	108494_3085_00507	108498_3089_00888	108504_3095_00377	108508_3099_00166	108524_3325_00878	108528_3330_00566	108546_3348_00779	112371_CAM000139_1663_00046
g00598_00003__g00598	NA	hypothetical protein	460	0	1	138	1	NA	NA		NA(460)	339	372	105577_PA010_00238	105578_PA017_00291	105579_PA026_00732	105580_PA028_00602	105581_PA029_01192	105583_PA031_00098	105584_PA032_00054	105585_PA033_00654	105586_PA034_00151	105587_PA040_00057	105590_PA048_00598	105593_PA061_00856	105594_PA062_00112	105597_PA065_01463	105601_PA070_00729	105614_PA093_00052	105616_PV004_00851	105636_PV086_00541	105640_PV091_00232	105642_PV093_00908	105746_cerdo_0_1_C1_00568	105747_cerdo_0_1_C2_00615	108479_3070_00311	108481_3072_00013	108483_3074_00172	108486_3077_00214	108491_3082_00086	108492_3083_00002	108494_3085_00218	108498_3089_01231	108504_3095_01299	108508_3099_00034	108524_3325_00091	108528_3330_00077	108546_3348_01157	112371_CAM000139_1663_00592
g01153_00005__g01153	yidC	Membrane protein insertase YidC	460	0	1	139	1	NA	NA		yidC(460)	888	1596	105577_PA010_01315	105578_PA017_01498	105579_PA026_01377	105580_PA028_01502	105581_PA029_01211	105583_PA031_01449	105584_PA032_01384	105585_PA033_01260	105586_PA034_01294	105587_PA040_00681	105590_PA048_01435	105593_PA061_00142	105594_PA062_01309	105597_PA065_01202	105601_PA070_01044	105614_PA093_01432	105616_PV004_01340	105636_PV086_00015	105640_PV091_01404	105642_PV093_01426	105746_cerdo_0_1_C1_00436	105747_cerdo_0_1_C2_00019	108479_3070_00926	108481_3072_01054	108483_3074_01539	108486_3077_01066	108491_3082_00425	108492_3083_00579	108494_3085_00376	108498_3089_01061	108504_3095_00390	108508_3099_00904	108524_3325_00421	108528_3330_00623	108546_3348_00454	112371_CAM000139_1663_00423
g02194_00006__g02194	rpmB	50S ribosomal protein L28	460	0	1	140	1	NA	NA		rpmB(460)	159	195	105577_PA010_00145	105578_PA017_00384	105579_PA026_01054	105580_PA028_00509	105581_PA029_00245	105583_PA031_00602	105584_PA032_00147	105585_PA033_00995	105586_PA034_00244	105587_PA040_00150	105590_PA048_00505	105593_PA061_01133	105594_PA062_00019	105597_PA065_00769	105601_PA070_00636	105614_PA093_00145	105616_PV004_00414	105636_PV086_00448	105640_PV091_00325	105642_PV093_00504	105746_cerdo_0_1_C1_00475	105747_cerdo_0_1_C2_00708	108479_3070_00608	108481_3072_00106	108483_3074_01220	108486_3077_01315	108491_3082_00948	108492_3083_00221	108494_3085_01375	108498_3089_00092	108504_3095_00526	108508_3099_00957	108524_3325_00965	108528_3330_00010	108546_3348_00436	112371_CAM000139_1663_00685
g02067_00004__g02067	ilvH	Acetolactate synthase isozyme 3 small subunit	460	0	1	141	1	NA	NA		ilvH(460)	414	465	105577_PA010_00717	105578_PA017_01084	105579_PA026_00911	105580_PA028_01405	105581_PA029_00915	105583_PA031_01087	105584_PA032_00884	105585_PA033_01086	105586_PA034_00862	105587_PA040_01751	105590_PA048_01381	105593_PA061_01720	105594_PA062_01045	105597_PA065_01091	105601_PA070_01287	105614_PA093_01065	105616_PV004_00494	105636_PV086_01517	105640_PV091_00532	105642_PV093_01160	105746_cerdo_0_1_C1_01617	105747_cerdo_0_1_C2_01578	108479_3070_00527	108481_3072_01109	108483_3074_00858	108486_3077_00296	108491_3082_01089	108492_3083_00616	108494_3085_00818	108498_3089_00767	108504_3095_00995	108508_3099_01398	108524_3325_00674	108528_3330_00975	108546_3348_00653	112371_CAM000139_1663_01390
g00336_00004__g00336	rexB	hypothetical protein	460	0	1	142	1	NA	NA		NA(461):rexB(3)	255	2367	105577_PA010_00507	105578_PA017_00958	105579_PA026_00466	105580_PA028_01004	105581_PA029_00596	105583_PA031_01304	105584_PA032_00299	105585_PA033_00708	105586_PA034_00437	105587_PA040_00614	105590_PA048_00834	105593_PA061_00669	105594_PA062_00415	105597_PA065_00387	105601_PA070_00338	105614_PA093_00635	105616_PV004_01298	105636_PV086_00967	105640_PV091_00693	105642_PV093_00719	105746_cerdo_0_1_C1_01483;105746_cerdo_0_1_C1_01806	105747_cerdo_0_1_C2_01543	108479_3070_01189	108481_3072_00511	108483_3074_00691	108486_3077_00302	108491_3082_01340	108492_3083_00898	108494_3085_01082	108498_3089_01014	108504_3095_01263	108508_3099_00610	108524_3325_00002	108528_3330_00460	108546_3348_00559	112371_CAM000139_1663_00784
g00249_00004__g00249	pglI	GalNAc(5)-diNAcBac-PP-undecaprenol beta-1%2C3-glucosyltransferase	460	0	1	143	1	NA	NA		pglI(461)	177	942	105577_PA010_01124	105578_PA017_00140	105579_PA026_00010	105580_PA028_00010	105581_PA029_00144	105583_PA031_01041	105584_PA032_00623	105585_PA033_01114	105586_PA034_00841	105587_PA040_00823	105590_PA048_00010	105593_PA061_01093	105594_PA062_00599	105597_PA065_00883	105601_PA070_00158	105614_PA093_00985	105616_PV004_00741	105636_PV086_00327	105640_PV091_01471	105642_PV093_01331	105746_cerdo_0_1_C1_00122	105747_cerdo_0_1_C2_00333	108479_3070_01415	108481_3072_00982	108483_3074_00585	108486_3077_00731	108491_3082_00784	108492_3083_00493	108494_3085_01308	108498_3089_01041	108504_3095_00625	108508_3099_00892	108524_3325_00869	108528_3330_00679	108546_3348_01405	112371_CAM000139_1663_00117
g01525_00004__g01525	pstA	hypothetical protein	460	0	1	144	1	NA	NA		NA(459):pstA(3)	123	1089	105577_PA010_01340	105578_PA017_00241	105579_PA026_01121	105580_PA028_00428	105581_PA029_00685	105583_PA031_01761	105584_PA032_00005	105585_PA033_00858	105586_PA034_00102	105587_PA040_00003	105590_PA048_00433	105593_PA061_00995	105594_PA062_01417	105597_PA065_00279	105601_PA070_01408	105614_PA093_00002	105616_PV004_00101	105636_PV086_00690	105640_PV091_00182	105642_PV093_00858	105746_cerdo_0_1_C1_00619	105747_cerdo_0_1_C2_00564	108479_3070_01569	108481_3072_00569	108483_3074_00222	108486_3077_01345	108491_3082_00002	108492_3083_00052	108494_3085_01019	108498_3089_00818	108504_3095_01092	108508_3099_00737;108508_3099_00738	108524_3325_01393	108528_3330_01236	108546_3348_01302	112371_CAM000139_1663_00542
g00876_00002__g00876	NA	hypothetical protein	460	0	1	145	1	NA	NA		NA(461)	255	429	105577_PA010_00130	105578_PA017_00863	105579_PA026_01468	105580_PA028_00904	105581_PA029_00129	105583_PA031_00492	105584_PA032_00478	105585_PA033_00134	105586_PA034_00561	105587_PA040_00976	105590_PA048_00762	105593_PA061_00129	105594_PA062_00302	105597_PA065_00612	105601_PA070_00891	105614_PA093_00909	105616_PV004_00935	105636_PV086_01140	105640_PV091_01031	105642_PV093_00843	105746_cerdo_0_1_C1_01242	105747_cerdo_0_1_C2_01219	108479_3070_00349	108481_3072_00863	108483_3074_01193	108486_3077_00702	108491_3082_01060	108492_3083_01426	108494_3085_00239	108498_3089_00328	108504_3095_00667	108508_3099_01345	108524_3325_00787	108528_3330_00452	108546_3348_01378	112371_CAM000139_1663_01238
g00719_00003__g00719	aroK	Shikimate kinase	460	0	1	146	1	NA	NA		aroK(460):NA(1)	213	498	105577_PA010_00293	105578_PA017_00445	105579_PA026_01113	105580_PA028_00204	105581_PA029_01442	105583_PA031_01235	105584_PA032_00331	105585_PA033_00778	105586_PA034_00591	105587_PA040_00212	105590_PA048_00196	105593_PA061_00752	105594_PA062_01292	105597_PA065_00042	105601_PA070_00491	105614_PA093_00321	105616_PV004_01023	105636_PV086_01620	105640_PV091_00136	105642_PV093_00138	105746_cerdo_0_1_C1_01055	105747_cerdo_0_1_C2_00772	108479_3070_00690	108481_3072_00800	108483_3074_00369	108486_3077_00890	108491_3082_00187	108492_3083_00105	108494_3085_00276	108498_3089_00686	108504_3095_00733	108508_3099_00536	108524_3325_00559	108528_3330_00666	108546_3348_00430	112371_CAM000139_1663_01045
g00611_1_00006__g00611_1	recG	ATP-dependent DNA helicase RecG	460	0	1	147	1	NA	NA		recG(458):mfd(3):NA(2)	312	1815	105577_PA010_00159	105578_PA017_00370	105579_PA026_01040	105580_PA028_00523	105581_PA029_00259	105583_PA031_00588	105584_PA032_00133	105585_PA033_00981	105586_PA034_00230	105587_PA040_00136	105590_PA048_00519	105593_PA061_01119	105594_PA062_00033	105597_PA065_00783	105601_PA070_00650	105614_PA093_00131	105616_PV004_00400	105636_PV086_00462	105640_PV091_00311	105642_PV093_00518	105746_cerdo_0_1_C1_00489	105747_cerdo_0_1_C2_00694	108479_3070_00594	108481_3072_00092	108483_3074_00077	108486_3077_00093	108491_3082_01218	108492_3083_00207	108494_3085_01022	108498_3089_00078	108504_3095_00359	108508_3099_00348	108524_3325_01371	108528_3330_00024	108546_3348_00104	112371_CAM000139_1663_00671
g00618_00003__g00618	yojI	ABC transporter ATP-binding/permease protein YojI	460	0	1	148	1	NA	NA		yojI(461)	225	1632	105577_PA010_00361	105578_PA017_00602	105579_PA026_01214	105580_PA028_01445	105581_PA029_00644	105583_PA031_01249	105584_PA032_01498	105585_PA033_01029	105586_PA034_00261	105587_PA040_01074	105590_PA048_01024	105593_PA061_00562	105594_PA062_01549	105597_PA065_00641	105601_PA070_00926	105614_PA093_00178	105616_PV004_00164	105636_PV086_00752	105640_PV091_00373	105642_PV093_01444	105746_cerdo_0_1_C1_00886	105747_cerdo_0_1_C2_00941	108479_3070_01634	108481_3072_00276	108483_3074_00777	108486_3077_00936	108491_3082_01347	108492_3083_00950	108494_3085_01079	108498_3089_00163	108504_3095_00851	108508_3099_01000	108524_3325_01296	108528_3330_00939	108546_3348_00829	112371_CAM000139_1663_01202
g01745_00005__g01745	nfuA	hypothetical protein	460	0	1	149	1	NA	NA		NA(459):nfuA(1)	156	273	105577_PA010_00434	105578_PA017_00673	105579_PA026_00963	105580_PA028_00679	105581_PA029_01034	105583_PA031_00682	105584_PA032_01849	105585_PA033_01307	105586_PA034_00331	105587_PA040_00856	105590_PA048_01234	105593_PA061_00933	105594_PA062_01031	105597_PA065_00710	105601_PA070_00995	105614_PA093_00247	105616_PV004_00317	105636_PV086_00822	105640_PV091_00443	105642_PV093_00950	105746_cerdo_0_1_C1_00812	105747_cerdo_0_1_C2_01015	108479_3070_00260	108481_3072_01372	108483_3074_01606	108486_3077_01001	108491_3082_00451	108492_3083_00578	108494_3085_00328	108498_3089_00582	108504_3095_00195	108508_3099_00116	108524_3325_01263	108528_3330_01363	108546_3348_00468	112371_CAM000139_1663_01139
g00049_00006__g00049	tufA	Elongation factor Tu	460	0	1	150	1	NA	NA		tufA(459):tuf(1)	315	1200	105577_PA010_00165	105578_PA017_00364	105579_PA026_01034	105580_PA028_00529	105581_PA029_00265	105583_PA031_00582	105584_PA032_00127	105585_PA033_00975	105586_PA034_00224	105587_PA040_00130	105590_PA048_00525	105593_PA061_01113	105594_PA062_00039	105597_PA065_00789	105601_PA070_00656	105614_PA093_00125	105616_PV004_00394	105636_PV086_00468	105640_PV091_00305	105642_PV093_00524	105746_cerdo_0_1_C1_00495	105747_cerdo_0_1_C2_00688	108479_3070_00588	108481_3072_00086	108483_3074_00071	108486_3077_00087	108491_3082_00616	108492_3083_00510	108494_3085_00734	108498_3089_00072	108504_3095_00353	108508_3099_00342	108524_3325_00491	108528_3330_00030	108546_3348_00098	112371_CAM000139_1663_00665
g01801_00005__g01801	NA	hypothetical protein	460	0	1	151	1	NA	NA		NA(460)	210	1557	105577_PA010_01166	105578_PA017_00164	105579_PA026_01351	105580_PA028_00807	105581_PA029_01083	105583_PA031_00242	105584_PA032_00990	105585_PA033_00455	105586_PA034_01252	105587_PA040_01502	105590_PA048_01168	105593_PA061_01390	105594_PA062_01355	105597_PA065_00907	105601_PA070_00182	105614_PA093_01356	105616_PV004_00665	105636_PV086_00355	105640_PV091_01430	105642_PV093_01292	105746_cerdo_0_1_C1_00090	105747_cerdo_0_1_C2_00365	108479_3070_00751	108481_3072_01163	108483_3074_00094	108486_3077_00452	108491_3082_00040	108492_3083_00150	108494_3085_00061	108498_3089_00472	108504_3095_00468	108508_3099_00986	108524_3325_00053	108528_3330_00279	108546_3348_00246	112371_CAM000139_1663_00089
g01533_00005__g01533	NA	hypothetical protein	460	0	1	152	1	NA	NA		NA(460)	792	1032	105577_PA010_01483	105578_PA017_00721	105579_PA026_01011	105580_PA028_00727	105581_PA029_01459	105583_PA031_00728	105584_PA032_01298	105585_PA033_01624	105586_PA034_00379	105587_PA040_00902	105590_PA048_01282	105593_PA061_00981	105594_PA062_01514	105597_PA065_01707	105601_PA070_01728	105614_PA093_01542	105616_PV004_00365	105636_PV086_00870	105640_PV091_00491	105642_PV093_01540	105746_cerdo_0_1_C1_00764	105747_cerdo_0_1_C2_01063	108479_3070_01661	108481_3072_01594	108483_3074_01019	108486_3077_00864	108491_3082_01282	108492_3083_00479	108494_3085_00221	108498_3089_01146	108504_3095_00593	108508_3099_00803	108524_3325_00898	108528_3330_00555	108546_3348_00628	112371_CAM000139_1663_01091
g01940_00004__g01940	accD	Acetyl-coenzyme A carboxylase carboxyl transferase subunit beta	460	0	1	153	1	NA	NA		accD(460)	744	843	105577_PA010_00124	105578_PA017_00857	105579_PA026_01462	105580_PA028_00898	105581_PA029_00123	105583_PA031_00486	105584_PA032_00472	105585_PA033_00128	105586_PA034_00555	105587_PA040_00982	105590_PA048_00756	105593_PA061_00123	105594_PA062_00296	105597_PA065_00606	105601_PA070_00885	105614_PA093_00903	105616_PV004_00929	105636_PV086_01134	105640_PV091_01025	105642_PV093_00837	105746_cerdo_0_1_C1_01236	105747_cerdo_0_1_C2_01213	108479_3070_00355	108481_3072_00869	108483_3074_01187	108486_3077_00708	108491_3082_01031	108492_3083_00115	108494_3085_01118	108498_3089_00322	108504_3095_00673	108508_3099_01332	108524_3325_01417	108528_3330_01529	108546_3348_01137	112371_CAM000139_1663_01244
g01485_1_00010__g01485_1	alaS	Alanine--tRNA ligase	460	0	1	154	1	NA	NA		alaS(460):NA(1)	255	2562	105577_PA010_00200	105578_PA017_00329	105579_PA026_00694	105580_PA028_00564	105581_PA029_00300	105583_PA031_00060	105584_PA032_00092	105585_PA033_00616	105586_PA034_00189	105587_PA040_00095	105590_PA048_00560	105593_PA061_00818	105594_PA062_00074	105597_PA065_00824	105601_PA070_00691	105614_PA093_00090	105616_PV004_01035	105636_PV086_00503	105640_PV091_00270	105642_PV093_00559	105746_cerdo_0_1_C1_00530	105747_cerdo_0_1_C2_00653	108479_3070_01286	108481_3072_00051	108483_3074_00036	108486_3077_00191	108491_3082_00567	108492_3083_00200	108494_3085_00092	108498_3089_00037	108504_3095_01052	108508_3099_00072	108524_3325_00415	108528_3330_00354	108546_3348_00389	112371_CAM000139_1663_00630
g00982_00005__g00982	mnmA	tRNA-specific 2-thiouridylase MnmA	460	0	1	155	1	NA	NA		mnmA(393):thiI(66):NA(1)	945	984	105577_PA010_00420	105578_PA017_00660	105579_PA026_01416	105580_PA028_00665	105581_PA029_01531	105583_PA031_01675	105584_PA032_01218	105585_PA033_01173	105586_PA034_00317	105587_PA040_00845	105590_PA048_01079	105593_PA061_00617	105594_PA062_00787	105597_PA065_00696	105601_PA070_00981	105614_PA093_00234	105616_PV004_00223	105636_PV086_00808	105640_PV091_00430	105642_PV093_00937	105746_cerdo_0_1_C1_00824	105747_cerdo_0_1_C2_01003	108479_3070_00246	108481_3072_00220	108483_3074_01461	108486_3077_00761	108491_3082_01169	108492_3083_00779	108494_3085_01363	108498_3089_00569	108504_3095_00208	108508_3099_00128	108524_3325_01028	108528_3330_00731	108546_3348_01269	112371_CAM000139_1663_01152
g00086_1_00004__g00086_1	yfkO	hypothetical protein	460	0	1	156	1	NA	NA		NA(555):yfkO(401):phnO(50):rutE(1)	150	1008	105577_PA010_01211;105577_PA010_01212	105578_PA017_00064;105578_PA017_00065	105579_PA026_00075;105579_PA026_00076	105580_PA028_00075;105580_PA028_00076	105581_PA029_00209;105581_PA029_00210	105583_PA031_01586;105583_PA031_01587	105584_PA032_00751;105584_PA032_00752	105585_PA033_00948;105585_PA033_00949	105586_PA034_01038;105586_PA034_01039	105587_PA040_00753;105587_PA040_00754;105587_PA040_00755	105590_PA048_00075;105590_PA048_00076	105593_PA061_01314;105593_PA061_01315	105594_PA062_01460;105594_PA062_01461	105597_PA065_01324;105597_PA065_01325	105601_PA070_00092;105601_PA070_00093	105614_PA093_00761;105614_PA093_00762;105614_PA093_00763	105616_PV004_00818;105616_PV004_00819	105636_PV086_00261;105636_PV086_00262	105640_PV091_01314;105640_PV091_01315	105642_PV093_00211;105642_PV093_00212	105746_cerdo_0_1_C1_00187;105746_cerdo_0_1_C1_00188;105746_cerdo_0_1_C1_00189	105747_cerdo_0_1_C2_00266;105747_cerdo_0_1_C2_00267;105747_cerdo_0_1_C2_00268	108479_3070_00892;108479_3070_00893	108481_3072_01374;108481_3072_01375	108483_3074_00811;108483_3074_00812	108486_3077_00254;108486_3077_00255	108491_3082_00728;108491_3082_00729	108492_3083_00963;108492_3083_00964	108494_3085_00390;108494_3085_00391	108498_3089_00448;108498_3089_00449;108498_3089_00450	108504_3095_00975;108504_3095_00976	108508_3099_00771;108508_3099_00772;108508_3099_00773	108524_3325_00901;108524_3325_00902	108528_3330_01188;108528_3330_01189;108528_3330_01190	108546_3348_00187;108546_3348_00188	112371_CAM000139_1663_00183;112371_CAM000139_1663_00184
g00514_1_00019__g00514_1	ftsH	ATP-dependent zinc metalloprotease FtsH	460	0	1	157	1	NA	NA		ftsH(461)	345	1950	105577_PA010_01134	105578_PA017_00130	105579_PA026_00020	105580_PA028_00020	105581_PA029_00154	105583_PA031_01051	105584_PA032_00633	105585_PA033_01124	105586_PA034_00831	105587_PA040_00813	105590_PA048_00020	105593_PA061_01083	105594_PA062_00609	105597_PA065_00873	105601_PA070_00148	105614_PA093_00995	105616_PV004_00751	105636_PV086_00317	105640_PV091_01481	105642_PV093_01341	105746_cerdo_0_1_C1_00132	105747_cerdo_0_1_C2_00323	108479_3070_01049	108481_3072_00992	108483_3074_00595	108486_3077_00694	108491_3082_00554	108492_3083_01286	108494_3085_00333	108498_3089_01031	108504_3095_00577	108508_3099_01550	108524_3325_01343	108528_3330_00873	108546_3348_00513	112371_CAM000139_1663_00127
g00511_1_00003__g00511_1	rppH	RNA pyrophosphohydrolase	460	0	1	158	1	NA	NA		rppH(460):NA(454):lysC(5)	336	1641	105577_PA010_00723;105577_PA010_00724	105578_PA017_01090;105578_PA017_01091	105579_PA026_00917;105579_PA026_00918	105580_PA028_01398;105580_PA028_01399	105581_PA029_00908;105581_PA029_00909	105583_PA031_01080;105583_PA031_01081	105584_PA032_00890;105584_PA032_00891	105585_PA033_01079;105585_PA033_01080	105586_PA034_00868;105586_PA034_00869	105587_PA040_01744;105587_PA040_01745	105590_PA048_01374;105590_PA048_01375	105593_PA061_01713;105593_PA061_01714	105594_PA062_01038;105594_PA062_01039	105597_PA065_01097;105597_PA065_01098	105601_PA070_01293;105601_PA070_01294	105614_PA093_01058;105614_PA093_01059	105616_PV004_00487;105616_PV004_00488	105636_PV086_01523;105636_PV086_01524	105640_PV091_00538;105640_PV091_00539	105642_PV093_01153;105642_PV093_01154	105746_cerdo_0_1_C1_01610;105746_cerdo_0_1_C1_01611	105747_cerdo_0_1_C2_01584;105747_cerdo_0_1_C2_01585	108479_3070_00520;108479_3070_00521	108481_3072_01102;108481_3072_01103	108483_3074_00851;108483_3074_00852	108486_3077_00289;108486_3077_00290	108491_3082_01427	108492_3083_00609;108492_3083_00610	108494_3085_01198;108494_3085_01199	108498_3089_00760;108498_3089_00761	108504_3095_00988;108504_3095_00989	108508_3099_01421;108508_3099_01422	108524_3325_00667;108524_3325_00668	108528_3330_00290;108528_3330_00291	108546_3348_01424;108546_3348_01425	112371_CAM000139_1663_01396;112371_CAM000139_1663_01397
g00053_00006__g00053	trxB	Thioredoxin reductase	460	0	1	159	1	NA	NA		trxB(460)	939	939	105577_PA010_01001	105578_PA017_01641	105579_PA026_01825	105580_PA028_01179	105581_PA029_01490	105583_PA031_00844	105584_PA032_00814	105585_PA033_01423	105586_PA034_01347	105587_PA040_00916	105590_PA048_01515	105593_PA061_01514	105594_PA062_00853	105597_PA065_01575	105601_PA070_01521	105614_PA093_01245	105616_PV004_00869	105636_PV086_01702	105640_PV091_01777	105642_PV093_01188	105746_cerdo_0_1_C1_01700	105747_cerdo_0_1_C2_01677	108479_3070_01624	108481_3072_00726	108483_3074_01066	108486_3077_01445	108491_3082_00823	108492_3083_01471	108494_3085_01244	108498_3089_01383	108504_3095_01390	108508_3099_00415	108524_3325_01431	108528_3330_00663	108546_3348_00040	112371_CAM000139_1663_01606
g00294_00004__g00294	NA	hypothetical protein	460	0	1	160	1	NA	NA		NA(463)	207	1395	105577_PA010_00615	105578_PA017_01217	105579_PA026_00681	105580_PA028_01737	105581_PA029_01709	105583_PA031_01365	105584_PA032_01423	105585_PA033_01379	105586_PA034_01129	105587_PA040_01734	105590_PA048_01675	105593_PA061_00338	105594_PA062_00381	105597_PA065_01527	105601_PA070_01687	105614_PA093_01674	105616_PV004_01688	105636_PV086_01276	105640_PV091_01633	105642_PV093_00480	105746_cerdo_0_1_C1_01764	105747_cerdo_0_1_C2_01758	108479_3070_01239	108481_3072_01151	108483_3074_01131	108486_3077_01083	108491_3082_01101	108492_3083_01111	108494_3085_00702	108498_3089_01565	108504_3095_01129	108508_3099_01434	108524_3325_01114	108528_3330_00881	108546_3348_00277	112371_CAM000139_1663_00900
[truncated: 3,225 more rows]
[truncated: 424 more columns]

## Sheet: Table_S4_pangenome_summary
Supplementary table S4: Summary of the number of gene families included in the core, accessory and pangenome
# 3611 gene families in 460 genomes.
# 307 contain greater than one allele at the thresholds analysed.
# 758 contain fission/fusion events.
# 241 contain duplication/loss.
%isolates	#clusters	>1 allele	fission/fusion	multicopy
0-10%	1488	41	72	7
10-25%	310	75	75	22
25-50%	195	92	72	43
50-75%	84	33	48	36
75-90%	46	9	23	10
90-95%	59	12	36	18
95-100%	1429	45	432	105

## Sheet: Table_S5_Iquitos
Supplementary table S5: Estiamted population growth of Iquitos, Peru
year	ST1150_mean Ne	Human pop
2020	0.397	500000
2019	1.43
2018	3.73
[truncated: 309 more rows]

## Sheet: Table_S6_poultry
Supplementary table S6: Estiamted poultry production numbers for Iquitos, Peru (1999-2025)
[truncated: 28 more rows]

[truncated: 3 more sheets: Table_S7_phen_AMR, Table_S8_geno_AMR, Table_S9_virulence]
